# Supplementary material for: Graph-based Pangenome Analysis Reveals the Genetic Control of Root Development in Cynanchum Species
Source: Research Square preprint supplement (doi:10.21203/rs.3.rs-7014984/v1), 2025-07-30
Supplement: Supplementary file 1 [file 9e4ecb240156d18cd85687bd.xlsx]

## Sheet: Supplementary Table
Supplementary Table 1. Oligo-FISH primer information.
Chromosome	5' Adaptor Sequence	5' Adaptor Fluorochromes	3' Adaptor Sequence	3' Adaptor Fluorochromes	Color
chr01	CCACAAAGGGCCGAGTTAAG	Texas Red	AGAGAATCCTCTCGCCATCC	Texas Red	Red
chr02	TGTGACAGTAGCTCCGAACC	Texas Red	AACCTGGGGAGTCGTAGTTC	Alexa Fluor	Yellow
chr03	TCTAGACGTCTCATGCCTCC	Cy3	TGCTCAGAAGTCGCCCATTA	Cy3	Red-orange
chr04	CCACAAAGGGCCGAGTTAAG	Texas Red	AGAGAATCCTCTCGCCATCC	Texas Red	Red
chr05	GCCTATAGACGCTTCCACCT	Cy3	ACCTCACAATCGCGAATCCT	Cy3	Red-orange
chr06	CGTCAACATCGACAACCCTC	Atto425	TTCACTGCGCATTCTGCAAG	Atto425	Blue
chr07	GCCTATAGACGCTTCCACCT	Cy3	ACCTCACAATCGCGAATCCT	Cy3	Red-orange
chr08	TCTAGACGTCTCATGCCTCC	Cy3	TGCTCAGAAGTCGCCCATTA	Cy3	Red-orange
chr09	CTGCGCAGTGTGCTTTTACA	Cy5	ACAAACCGTGTCTACAGCCA	Cy5	Far-red
chr10	CTGCGCAGTGTGCTTTTACA	Cy5	ACAAACCGTGTCTACAGCCA	Cy5	Far-red
chr11	CGTCAACATCGACAACCCTC	Atto425	TTCACTGCGCATTCTGCAAG	Atto425	Blue

## Sheet: Supplementary table 1 chr1
Supplementary Table 1. Oligo-FISH primer information.
No.	Target Sequence	5' Adaptor Sequence	3' Adaptor Sequence	Oligo Sequence
1	GTAGGTCAGAAGATTAGGCATCAGAACAATAAAATTATGAAGATCATCGA	CCACAAAGGGCCGAGTTAAG	AGAGAATCCTCTCGCCATCC	CCACAAAGGGCCGAGTTAAGGTAGGTCAGAAGATTAGGCATCAGAACAATAAAATTATGAAGATCATCGAAGAGAATCCTCTCGCCATCC
2	TCTTCTAATCAGGTAGGGTATGCCAAGGTATTTTCCATCTCCAGAACCAA	CCACAAAGGGCCGAGTTAAG	AGAGAATCCTCTCGCCATCC	CCACAAAGGGCCGAGTTAAGTCTTCTAATCAGGTAGGGTATGCCAAGGTATTTTCCATCTCCAGAACCAAAGAGAATCCTCTCGCCATCC
3	TCCGTGGCTGCCTTCATCTGGAACTTTCAAACCCATTACTCCACTATGCT	CCACAAAGGGCCGAGTTAAG	AGAGAATCCTCTCGCCATCC	CCACAAAGGGCCGAGTTAAGTCCGTGGCTGCCTTCATCTGGAACTTTCAAACCCATTACTCCACTATGCTAGAGAATCCTCTCGCCATCC
4	CTTCTCTATGAGCATTATCAACACCCAATTTATACGCAGATGATATCGTG	CCACAAAGGGCCGAGTTAAG	AGAGAATCCTCTCGCCATCC	CCACAAAGGGCCGAGTTAAGCTTCTCTATGAGCATTATCAACACCCAATTTATACGCAGATGATATCGTGAGAGAATCCTCTCGCCATCC
5	GATTCCCTCTAAACTCAACGTTAAAATGCAGTTATAACCTGTCAAATATT	CCACAAAGGGCCGAGTTAAG	AGAGAATCCTCTCGCCATCC	CCACAAAGGGCCGAGTTAAGGATTCCCTCTAAACTCAACGTTAAAATGCAGTTATAACCTGTCAAATATTAGAGAATCCTCTCGCCATCC
6	TTCTCCAAGCTGAACTCTTTCTTGAGGCCTTGGATAGTTGTCAAACACTT	CCACAAAGGGCCGAGTTAAG	AGAGAATCCTCTCGCCATCC	CCACAAAGGGCCGAGTTAAGTTCTCCAAGCTGAACTCTTTCTTGAGGCCTTGGATAGTTGTCAAACACTTAGAGAATCCTCTCGCCATCC
7	AACATGAACTAAAAGAATTGGCAAAATATGTAGCACAATGAACTAAAAGA	CCACAAAGGGCCGAGTTAAG	AGAGAATCCTCTCGCCATCC	CCACAAAGGGCCGAGTTAAGAACATGAACTAAAAGAATTGGCAAAATATGTAGCACAATGAACTAAAAGAAGAGAATCCTCTCGCCATCC
8	AGCTTTGAACCAAGTCGAGCTAGTCCCGTCTTCAGTTCTTCATATGTGAT	CCACAAAGGGCCGAGTTAAG	AGAGAATCCTCTCGCCATCC	CCACAAAGGGCCGAGTTAAGAGCTTTGAACCAAGTCGAGCTAGTCCCGTCTTCAGTTCTTCATATGTGATAGAGAATCCTCTCGCCATCC
9	TAGGACTGCACTATCTATTGGTTTATCAGATGCATCTCCTCCTTCCTTAA	CCACAAAGGGCCGAGTTAAG	AGAGAATCCTCTCGCCATCC	CCACAAAGGGCCGAGTTAAGTAGGACTGCACTATCTATTGGTTTATCAGATGCATCTCCTCCTTCCTTAAAGAGAATCCTCTCGCCATCC
10	ACAGTAGATTAATCTTATGTTGAAGCCAAGATCATTCATTACCTGCCCAG	CCACAAAGGGCCGAGTTAAG	AGAGAATCCTCTCGCCATCC	CCACAAAGGGCCGAGTTAAGACAGTAGATTAATCTTATGTTGAAGCCAAGATCATTCATTACCTGCCCAGAGAGAATCCTCTCGCCATCC
11	GAAATGGAAGCAATCACACCTTGTAAATCTCCTAACGGTACTGCAGATTA	CCACAAAGGGCCGAGTTAAG	AGAGAATCCTCTCGCCATCC	CCACAAAGGGCCGAGTTAAGGAAATGGAAGCAATCACACCTTGTAAATCTCCTAACGGTACTGCAGATTAAGAGAATCCTCTCGCCATCC
12	AGTGAAAATGCAGCCCTAAAAGCAACTGACTTTGGATTATCTGTATTCAT	CCACAAAGGGCCGAGTTAAG	AGAGAATCCTCTCGCCATCC	CCACAAAGGGCCGAGTTAAGAGTGAAAATGCAGCCCTAAAAGCAACTGACTTTGGATTATCTGTATTCATAGAGAATCCTCTCGCCATCC
13	TACTTTCTTTAGCTTAAGAATGTTGATTTTGCTTCTGGGTTGGTCCAATT	CCACAAAGGGCCGAGTTAAG	AGAGAATCCTCTCGCCATCC	CCACAAAGGGCCGAGTTAAGTACTTTCTTTAGCTTAAGAATGTTGATTTTGCTTCTGGGTTGGTCCAATTAGAGAATCCTCTCGCCATCC
14	ATTTCGTCAATCAAACTGAAACGCCGTAAGAAACAAATACTAGTAGTAGA	CCACAAAGGGCCGAGTTAAG	AGAGAATCCTCTCGCCATCC	CCACAAAGGGCCGAGTTAAGATTTCGTCAATCAAACTGAAACGCCGTAAGAAACAAATACTAGTAGTAGAAGAGAATCCTCTCGCCATCC
15	AATAAATAAAATTATACAGTGAAGCAAGCAGGCCGGTATACACAAATCAA	CCACAAAGGGCCGAGTTAAG	AGAGAATCCTCTCGCCATCC	CCACAAAGGGCCGAGTTAAGAATAAATAAAATTATACAGTGAAGCAAGCAGGCCGGTATACACAAATCAAAGAGAATCCTCTCGCCATCC
16	TTGTTCTAGTAGAGAAGTCCATTTCTAATTAAAACCACATATACATATAT	CCACAAAGGGCCGAGTTAAG	AGAGAATCCTCTCGCCATCC	CCACAAAGGGCCGAGTTAAGTTGTTCTAGTAGAGAAGTCCATTTCTAATTAAAACCACATATACATATATAGAGAATCCTCTCGCCATCC
17	CTCCATGCTGAGACCTTTGGCCTGAACCTTGTGATGATGCAGAATTCTGT	CCACAAAGGGCCGAGTTAAG	AGAGAATCCTCTCGCCATCC	CCACAAAGGGCCGAGTTAAGCTCCATGCTGAGACCTTTGGCCTGAACCTTGTGATGATGCAGAATTCTGTAGAGAATCCTCTCGCCATCC
18	CAGTACAACCGTCCTTTAAAACTTCATGGCTAACACTTTCTGCATCTGTC	CCACAAAGGGCCGAGTTAAG	AGAGAATCCTCTCGCCATCC	CCACAAAGGGCCGAGTTAAGCAGTACAACCGTCCTTTAAAACTTCATGGCTAACACTTTCTGCATCTGTCAGAGAATCCTCTCGCCATCC
19	TCCTGTTCAAACATTGCTGGATCAGTTCTCAGATTATTTATTTGTGCGGT	CCACAAAGGGCCGAGTTAAG	AGAGAATCCTCTCGCCATCC	CCACAAAGGGCCGAGTTAAGTCCTGTTCAAACATTGCTGGATCAGTTCTCAGATTATTTATTTGTGCGGTAGAGAATCCTCTCGCCATCC
20	TGTTGAATGACATAAATAATTGCTGAACATTTTGCTCTTGAACTCACTTC	CCACAAAGGGCCGAGTTAAG	AGAGAATCCTCTCGCCATCC	CCACAAAGGGCCGAGTTAAGTGTTGAATGACATAAATAATTGCTGAACATTTTGCTCTTGAACTCACTTCAGAGAATCCTCTCGCCATCC
21	GTTGAGAAACTGTTTTCCAAGAGAACATTTCAATTCTTAGTTGTATTTGG	CCACAAAGGGCCGAGTTAAG	AGAGAATCCTCTCGCCATCC	CCACAAAGGGCCGAGTTAAGGTTGAGAAACTGTTTTCCAAGAGAACATTTCAATTCTTAGTTGTATTTGGAGAGAATCCTCTCGCCATCC
22	AACAGCAAGAACACAAATTCGATAAAGTGGAGCTATAATTAAGAACATGC	CCACAAAGGGCCGAGTTAAG	AGAGAATCCTCTCGCCATCC	CCACAAAGGGCCGAGTTAAGAACAGCAAGAACACAAATTCGATAAAGTGGAGCTATAATTAAGAACATGCAGAGAATCCTCTCGCCATCC
23	CTGCAATATCGTGTATCATAATTTTGGTGTCAGTTTCTATATATCTCTTT	CCACAAAGGGCCGAGTTAAG	AGAGAATCCTCTCGCCATCC	CCACAAAGGGCCGAGTTAAGCTGCAATATCGTGTATCATAATTTTGGTGTCAGTTTCTATATATCTCTTTAGAGAATCCTCTCGCCATCC
24	CCTCCTTTACAAGACATGTCGATGAGAAGCGAAACCTGCCAATCAAGCGT	CCACAAAGGGCCGAGTTAAG	AGAGAATCCTCTCGCCATCC	CCACAAAGGGCCGAGTTAAGCCTCCTTTACAAGACATGTCGATGAGAAGCGAAACCTGCCAATCAAGCGTAGAGAATCCTCTCGCCATCC
25	TCTCTAACCTCACTTATGTCAGGAGAGCTTCTTATCAATTCACTTATACC	CCACAAAGGGCCGAGTTAAG	AGAGAATCCTCTCGCCATCC	CCACAAAGGGCCGAGTTAAGTCTCTAACCTCACTTATGTCAGGAGAGCTTCTTATCAATTCACTTATACCAGAGAATCCTCTCGCCATCC
26	AGATAATTAAAGTTGTGAAAAGTCATATTGAGATGAGAATTAGACAGAAA	CCACAAAGGGCCGAGTTAAG	AGAGAATCCTCTCGCCATCC	CCACAAAGGGCCGAGTTAAGAGATAATTAAAGTTGTGAAAAGTCATATTGAGATGAGAATTAGACAGAAAAGAGAATCCTCTCGCCATCC
27	TCTGGTGAAGAGATTTGCTTTCTTTCTACTTACCTTCGTCATGGTTCTAG	CCACAAAGGGCCGAGTTAAG	AGAGAATCCTCTCGCCATCC	CCACAAAGGGCCGAGTTAAGTCTGGTGAAGAGATTTGCTTTCTTTCTACTTACCTTCGTCATGGTTCTAGAGAGAATCCTCTCGCCATCC
28	CTCTGGGAAAGAATGCAAAGCTGGAACCTAAGAAATACTTTGATCTATTC	CCACAAAGGGCCGAGTTAAG	AGAGAATCCTCTCGCCATCC	CCACAAAGGGCCGAGTTAAGCTCTGGGAAAGAATGCAAAGCTGGAACCTAAGAAATACTTTGATCTATTCAGAGAATCCTCTCGCCATCC
29	GAGAGGCAGAATGTTGAAGTATATTCAGAAACAGCCACACACATGATTGT	CCACAAAGGGCCGAGTTAAG	AGAGAATCCTCTCGCCATCC	CCACAAAGGGCCGAGTTAAGGAGAGGCAGAATGTTGAAGTATATTCAGAAACAGCCACACACATGATTGTAGAGAATCCTCTCGCCATCC
30	AAGAATCCTACTTTCCATTATCAGTCTGGTTGTAAAATGAGAATTATGCA	CCACAAAGGGCCGAGTTAAG	AGAGAATCCTCTCGCCATCC	CCACAAAGGGCCGAGTTAAGAAGAATCCTACTTTCCATTATCAGTCTGGTTGTAAAATGAGAATTATGCAAGAGAATCCTCTCGCCATCC
31	TTATGATGGGTGCAAAGAGTTTAGGAATCTTTCATTAGGTTTCTCCAATC	CCACAAAGGGCCGAGTTAAG	AGAGAATCCTCTCGCCATCC	CCACAAAGGGCCGAGTTAAGTTATGATGGGTGCAAAGAGTTTAGGAATCTTTCATTAGGTTTCTCCAATCAGAGAATCCTCTCGCCATCC
32	TGAGGGGTGTTAAAGTCTCTATTAATAGAACTTCTAATGAGGTGAAAATT	CCACAAAGGGCCGAGTTAAG	AGAGAATCCTCTCGCCATCC	CCACAAAGGGCCGAGTTAAGTGAGGGGTGTTAAAGTCTCTATTAATAGAACTTCTAATGAGGTGAAAATTAGAGAATCCTCTCGCCATCC
33	TGTTCATCAATATTTGTATTTGTTTGAGCCTGTTAATTCTTGTGAAAGCT	CCACAAAGGGCCGAGTTAAG	AGAGAATCCTCTCGCCATCC	CCACAAAGGGCCGAGTTAAGTGTTCATCAATATTTGTATTTGTTTGAGCCTGTTAATTCTTGTGAAAGCTAGAGAATCCTCTCGCCATCC
34	TGTTCTTAGAACACTCCACTAAACTAAACTAGAACTAAAACTAAAACGTT	CCACAAAGGGCCGAGTTAAG	AGAGAATCCTCTCGCCATCC	CCACAAAGGGCCGAGTTAAGTGTTCTTAGAACACTCCACTAAACTAAACTAGAACTAAAACTAAAACGTTAGAGAATCCTCTCGCCATCC
35	AGGTTATTCGTATAAAGAAACTTTGACAAGACACAAGTTATAATTAATAT	CCACAAAGGGCCGAGTTAAG	AGAGAATCCTCTCGCCATCC	CCACAAAGGGCCGAGTTAAGAGGTTATTCGTATAAAGAAACTTTGACAAGACACAAGTTATAATTAATATAGAGAATCCTCTCGCCATCC
36	ATGATAGTCTACTTTTAGTGTGACATGTTGAACAATCCTACATCTAGATA	CCACAAAGGGCCGAGTTAAG	AGAGAATCCTCTCGCCATCC	CCACAAAGGGCCGAGTTAAGATGATAGTCTACTTTTAGTGTGACATGTTGAACAATCCTACATCTAGATAAGAGAATCCTCTCGCCATCC
37	TTCAGACAATAGTTGTTTATTCAATGCCGTTGGGTAAATTTTCTTTTCCC	CCACAAAGGGCCGAGTTAAG	AGAGAATCCTCTCGCCATCC	CCACAAAGGGCCGAGTTAAGTTCAGACAATAGTTGTTTATTCAATGCCGTTGGGTAAATTTTCTTTTCCCAGAGAATCCTCTCGCCATCC
38	TGTGAGATATTTGAACAGCAGGACAGGACAGGACCGGACCACCCACCAGT	CCACAAAGGGCCGAGTTAAG	AGAGAATCCTCTCGCCATCC	CCACAAAGGGCCGAGTTAAGTGTGAGATATTTGAACAGCAGGACAGGACAGGACCGGACCACCCACCAGTAGAGAATCCTCTCGCCATCC
39	CCATACTAATCTCATTCAAGTCCCAGATTTTAAACTCTAACTCAAATTAT	CCACAAAGGGCCGAGTTAAG	AGAGAATCCTCTCGCCATCC	CCACAAAGGGCCGAGTTAAGCCATACTAATCTCATTCAAGTCCCAGATTTTAAACTCTAACTCAAATTATAGAGAATCCTCTCGCCATCC
40	AGCATTTTGCACCCTATTTTAAGGAGTGTAAGAAAATTTTGTTTGCTCTT	CCACAAAGGGCCGAGTTAAG	AGAGAATCCTCTCGCCATCC	CCACAAAGGGCCGAGTTAAGAGCATTTTGCACCCTATTTTAAGGAGTGTAAGAAAATTTTGTTTGCTCTTAGAGAATCCTCTCGCCATCC
41	AGCAGACTTCACTGATCTCTGTAATAGGGGTCCCATCATCTCCATTTCCT	CCACAAAGGGCCGAGTTAAG	AGAGAATCCTCTCGCCATCC	CCACAAAGGGCCGAGTTAAGAGCAGACTTCACTGATCTCTGTAATAGGGGTCCCATCATCTCCATTTCCTAGAGAATCCTCTCGCCATCC
42	CCACTTTTGCATCAACAAGCTTCATCTGAACCCTTTCCTCACGCCAGACC	CCACAAAGGGCCGAGTTAAG	AGAGAATCCTCTCGCCATCC	CCACAAAGGGCCGAGTTAAGCCACTTTTGCATCAACAAGCTTCATCTGAACCCTTTCCTCACGCCAGACCAGAGAATCCTCTCGCCATCC
43	CTTCAACTTCAGCTTTGTCTTCTGCAATTTCCTTAGCAAGTTCATCGCAT	CCACAAAGGGCCGAGTTAAG	AGAGAATCCTCTCGCCATCC	CCACAAAGGGCCGAGTTAAGCTTCAACTTCAGCTTTGTCTTCTGCAATTTCCTTAGCAAGTTCATCGCATAGAGAATCCTCTCGCCATCC
44	TATTGATGACATAAAATCTGACTTGAGTAGGGAGAGGAAAACTCGGCAAA	CCACAAAGGGCCGAGTTAAG	AGAGAATCCTCTCGCCATCC	CCACAAAGGGCCGAGTTAAGTATTGATGACATAAAATCTGACTTGAGTAGGGAGAGGAAAACTCGGCAAAAGAGAATCCTCTCGCCATCC
45	ACGTGCAATGTAATTATGAACTTCCTGTCCAAATTTAAGTGCTAACAAAA	CCACAAAGGGCCGAGTTAAG	AGAGAATCCTCTCGCCATCC	CCACAAAGGGCCGAGTTAAGACGTGCAATGTAATTATGAACTTCCTGTCCAAATTTAAGTGCTAACAAAAAGAGAATCCTCTCGCCATCC
46	GAAGCTCAGTTTTCCCACCAGTGATCTTCATTGTCTCCCAGATTCAGCCA	CCACAAAGGGCCGAGTTAAG	AGAGAATCCTCTCGCCATCC	CCACAAAGGGCCGAGTTAAGGAAGCTCAGTTTTCCCACCAGTGATCTTCATTGTCTCCCAGATTCAGCCAAGAGAATCCTCTCGCCATCC
47	CTCTGTAAATAAGGTTTTCTTCCATCCTTGCTCTTTCGTGGTTTAAGGTT	CCACAAAGGGCCGAGTTAAG	AGAGAATCCTCTCGCCATCC	CCACAAAGGGCCGAGTTAAGCTCTGTAAATAAGGTTTTCTTCCATCCTTGCTCTTTCGTGGTTTAAGGTTAGAGAATCCTCTCGCCATCC
48	TATTAATTAATTAACACAGATTCATGCATGTTTCAAACTGTCAATATATA	CCACAAAGGGCCGAGTTAAG	AGAGAATCCTCTCGCCATCC	CCACAAAGGGCCGAGTTAAGTATTAATTAATTAACACAGATTCATGCATGTTTCAAACTGTCAATATATAAGAGAATCCTCTCGCCATCC
49	ATATAGATATGACTTAAAGATGCTATCTATAATTAGAATTTATTCAATAC	CCACAAAGGGCCGAGTTAAG	AGAGAATCCTCTCGCCATCC	CCACAAAGGGCCGAGTTAAGATATAGATATGACTTAAAGATGCTATCTATAATTAGAATTTATTCAATACAGAGAATCCTCTCGCCATCC
50	ATTCTCTCTATACACTCATAAATCTTTTATACACTTTTAATATAATATAT	CCACAAAGGGCCGAGTTAAG	AGAGAATCCTCTCGCCATCC	CCACAAAGGGCCGAGTTAAGATTCTCTCTATACACTCATAAATCTTTTATACACTTTTAATATAATATATAGAGAATCCTCTCGCCATCC
51	GCTTATTGCTCCTTTCTATCTTTATCTGCATGAGTTTGACCATTCTCTTT	CCACAAAGGGCCGAGTTAAG	AGAGAATCCTCTCGCCATCC	CCACAAAGGGCCGAGTTAAGGCTTATTGCTCCTTTCTATCTTTATCTGCATGAGTTTGACCATTCTCTTTAGAGAATCCTCTCGCCATCC
52	TTCCTAGTACAATTTCAATCATACTTATCATTCTTTTATATATTTTCTTT	CCACAAAGGGCCGAGTTAAG	AGAGAATCCTCTCGCCATCC	CCACAAAGGGCCGAGTTAAGTTCCTAGTACAATTTCAATCATACTTATCATTCTTTTATATATTTTCTTTAGAGAATCCTCTCGCCATCC
53	TTAATATGAATCTCTCGAGAATAATAAGTAAAGTTATTATCAACTAAAAT	CCACAAAGGGCCGAGTTAAG	AGAGAATCCTCTCGCCATCC	CCACAAAGGGCCGAGTTAAGTTAATATGAATCTCTCGAGAATAATAAGTAAAGTTATTATCAACTAAAATAGAGAATCCTCTCGCCATCC
54	CCAAAATTTGAAACTCATGATTAAGCACTACTAAGCAAGTTATCAACGAT	CCACAAAGGGCCGAGTTAAG	AGAGAATCCTCTCGCCATCC	CCACAAAGGGCCGAGTTAAGCCAAAATTTGAAACTCATGATTAAGCACTACTAAGCAAGTTATCAACGATAGAGAATCCTCTCGCCATCC
55	GGATCTGCGGGTCATTGGTATACATCTGATGGAAGGAGAGTAAGTTCTCA	CCACAAAGGGCCGAGTTAAG	AGAGAATCCTCTCGCCATCC	CCACAAAGGGCCGAGTTAAGGGATCTGCGGGTCATTGGTATACATCTGATGGAAGGAGAGTAAGTTCTCAAGAGAATCCTCTCGCCATCC
56	TTTTCTTCTTTTCCGGTCCATGTGCTGCAGACTAACTAGTTTTACACTAC	CCACAAAGGGCCGAGTTAAG	AGAGAATCCTCTCGCCATCC	CCACAAAGGGCCGAGTTAAGTTTTCTTCTTTTCCGGTCCATGTGCTGCAGACTAACTAGTTTTACACTACAGAGAATCCTCTCGCCATCC
57	CAAACATTTATCATTGTGATCTTTGGACCTCCTTGTTCTCACTGCCTTCT	CCACAAAGGGCCGAGTTAAG	AGAGAATCCTCTCGCCATCC	CCACAAAGGGCCGAGTTAAGCAAACATTTATCATTGTGATCTTTGGACCTCCTTGTTCTCACTGCCTTCTAGAGAATCCTCTCGCCATCC
58	TATTTTGATGCTAGCTCCGGGACAGGGTTAAACTTTTCAGGGCAGTGTGA	CCACAAAGGGCCGAGTTAAG	AGAGAATCCTCTCGCCATCC	CCACAAAGGGCCGAGTTAAGTATTTTGATGCTAGCTCCGGGACAGGGTTAAACTTTTCAGGGCAGTGTGAAGAGAATCCTCTCGCCATCC
59	GTATGTGTTCTCCTGATTGTGTTTGCTGGATATGGAAATTTGCATTAAAA	CCACAAAGGGCCGAGTTAAG	AGAGAATCCTCTCGCCATCC	CCACAAAGGGCCGAGTTAAGGTATGTGTTCTCCTGATTGTGTTTGCTGGATATGGAAATTTGCATTAAAAAGAGAATCCTCTCGCCATCC
60	TGGCACCATCTCTGTCTTCGATGTAATCCGTGAGAAGTTTCTGTATCACC	CCACAAAGGGCCGAGTTAAG	AGAGAATCCTCTCGCCATCC	CCACAAAGGGCCGAGTTAAGTGGCACCATCTCTGTCTTCGATGTAATCCGTGAGAAGTTTCTGTATCACCAGAGAATCCTCTCGCCATCC
61	ATTATAGTTGTCTGTTTCCCATGTATACCTGACAGTCCGTTACTTTAAAC	CCACAAAGGGCCGAGTTAAG	AGAGAATCCTCTCGCCATCC	CCACAAAGGGCCGAGTTAAGATTATAGTTGTCTGTTTCCCATGTATACCTGACAGTCCGTTACTTTAAACAGAGAATCCTCTCGCCATCC
62	GATTTTGGTTGTTTTCCTATTAGTGATTTCTCTTTTATGAATCCTGAATA	CCACAAAGGGCCGAGTTAAG	AGAGAATCCTCTCGCCATCC	CCACAAAGGGCCGAGTTAAGGATTTTGGTTGTTTTCCTATTAGTGATTTCTCTTTTATGAATCCTGAATAAGAGAATCCTCTCGCCATCC
63	TTCCACCATCTTTGCTTCCATGCTAACATCAACAGAGGAAATTGTTTCAA	CCACAAAGGGCCGAGTTAAG	AGAGAATCCTCTCGCCATCC	CCACAAAGGGCCGAGTTAAGTTCCACCATCTTTGCTTCCATGCTAACATCAACAGAGGAAATTGTTTCAAAGAGAATCCTCTCGCCATCC
64	TCATGACTTCCATAATATTTGCTTCATGTTTCAGTTTGATTTTCCTGTTA	CCACAAAGGGCCGAGTTAAG	AGAGAATCCTCTCGCCATCC	CCACAAAGGGCCGAGTTAAGTCATGACTTCCATAATATTTGCTTCATGTTTCAGTTTGATTTTCCTGTTAAGAGAATCCTCTCGCCATCC
65	TACATATACTTTAGGTTTTGGTCTTTTAAATTGAGAGTTATCACAACCAA	CCACAAAGGGCCGAGTTAAG	AGAGAATCCTCTCGCCATCC	CCACAAAGGGCCGAGTTAAGTACATATACTTTAGGTTTTGGTCTTTTAAATTGAGAGTTATCACAACCAAAGAGAATCCTCTCGCCATCC
66	GCAAATGGGTCAGATTCTATTTTACCTAGTAAAGAAGAGAAATGCATTAG	CCACAAAGGGCCGAGTTAAG	AGAGAATCCTCTCGCCATCC	CCACAAAGGGCCGAGTTAAGGCAAATGGGTCAGATTCTATTTTACCTAGTAAAGAAGAGAAATGCATTAGAGAGAATCCTCTCGCCATCC
67	AGAACGAACCATCTTGCAGTCGACCAATTGGAGCTTTATGGGGTAATGGT	CCACAAAGGGCCGAGTTAAG	AGAGAATCCTCTCGCCATCC	CCACAAAGGGCCGAGTTAAGAGAACGAACCATCTTGCAGTCGACCAATTGGAGCTTTATGGGGTAATGGTAGAGAATCCTCTCGCCATCC
68	CATCTTTAGTTTTCTTTGATAATGGCAATTGACTGAACTTTACACAGCCG	CCACAAAGGGCCGAGTTAAG	AGAGAATCCTCTCGCCATCC	CCACAAAGGGCCGAGTTAAGCATCTTTAGTTTTCTTTGATAATGGCAATTGACTGAACTTTACACAGCCGAGAGAATCCTCTCGCCATCC
69	AAAATTAGTTACCTGGAGTTGCAGCCACATATTTTAGTTATTTATGAAGT	CCACAAAGGGCCGAGTTAAG	AGAGAATCCTCTCGCCATCC	CCACAAAGGGCCGAGTTAAGAAAATTAGTTACCTGGAGTTGCAGCCACATATTTTAGTTATTTATGAAGTAGAGAATCCTCTCGCCATCC
70	GACAATCTGTGGCATTTCTTCTTAGGTTCTGGAGAAGTTGTACAAAGCTA	CCACAAAGGGCCGAGTTAAG	AGAGAATCCTCTCGCCATCC	CCACAAAGGGCCGAGTTAAGGACAATCTGTGGCATTTCTTCTTAGGTTCTGGAGAAGTTGTACAAAGCTAAGAGAATCCTCTCGCCATCC
71	CTTTACGCCCACCAATAAGAAGTCCAGCACTAAAATTGTGATATTTCCCA	CCACAAAGGGCCGAGTTAAG	AGAGAATCCTCTCGCCATCC	CCACAAAGGGCCGAGTTAAGCTTTACGCCCACCAATAAGAAGTCCAGCACTAAAATTGTGATATTTCCCAAGAGAATCCTCTCGCCATCC
72	TCTTCAGCACATGGACGAGACAGAAAATTTTGATTGTTCACAGCTTCAGG	CCACAAAGGGCCGAGTTAAG	AGAGAATCCTCTCGCCATCC	CCACAAAGGGCCGAGTTAAGTCTTCAGCACATGGACGAGACAGAAAATTTTGATTGTTCACAGCTTCAGGAGAGAATCCTCTCGCCATCC
73	AATCCACCTGCAAGTACATGAATTGGAACATTAATAACCATTTTCACAAG	CCACAAAGGGCCGAGTTAAG	AGAGAATCCTCTCGCCATCC	CCACAAAGGGCCGAGTTAAGAATCCACCTGCAAGTACATGAATTGGAACATTAATAACCATTTTCACAAGAGAGAATCCTCTCGCCATCC
74	AATAATCACTAAATGACTACACAACACCTAATTGGCCATGATATGCAGGC	CCACAAAGGGCCGAGTTAAG	AGAGAATCCTCTCGCCATCC	CCACAAAGGGCCGAGTTAAGAATAATCACTAAATGACTACACAACACCTAATTGGCCATGATATGCAGGCAGAGAATCCTCTCGCCATCC
75	TTGGATGCATGCTCTTGAAATTTTGAGGCAATCTTCTTATTGGGAGGAAT	CCACAAAGGGCCGAGTTAAG	AGAGAATCCTCTCGCCATCC	CCACAAAGGGCCGAGTTAAGTTGGATGCATGCTCTTGAAATTTTGAGGCAATCTTCTTATTGGGAGGAATAGAGAATCCTCTCGCCATCC
76	TCCAAATCTAAATGTACATCTAGCCCGGCCCAAATTCCTGCATAACTAGA	CCACAAAGGGCCGAGTTAAG	AGAGAATCCTCTCGCCATCC	CCACAAAGGGCCGAGTTAAGTCCAAATCTAAATGTACATCTAGCCCGGCCCAAATTCCTGCATAACTAGAAGAGAATCCTCTCGCCATCC
77	GCACGGAGAAACTGAAACAAAGAGAAATTTTGAAGGATATATGGCAGGGT	CCACAAAGGGCCGAGTTAAG	AGAGAATCCTCTCGCCATCC	CCACAAAGGGCCGAGTTAAGGCACGGAGAAACTGAAACAAAGAGAAATTTTGAAGGATATATGGCAGGGTAGAGAATCCTCTCGCCATCC
78	TTGCGAGAAAATGCTAGTCAGATAATTCTCATCCATCCAGTACTGCAAGT	CCACAAAGGGCCGAGTTAAG	AGAGAATCCTCTCGCCATCC	CCACAAAGGGCCGAGTTAAGTTGCGAGAAAATGCTAGTCAGATAATTCTCATCCATCCAGTACTGCAAGTAGAGAATCCTCTCGCCATCC
79	AACATTAACCAAGCTTATGACATAAACAAATTAACTGACCTAAAAGGAGG	CCACAAAGGGCCGAGTTAAG	AGAGAATCCTCTCGCCATCC	CCACAAAGGGCCGAGTTAAGAACATTAACCAAGCTTATGACATAAACAAATTAACTGACCTAAAAGGAGGAGAGAATCCTCTCGCCATCC
80	TTTTGTAAATCCAATAGCCCACGTACTTTGTAGAGATCAATTCCTTGTTA	CCACAAAGGGCCGAGTTAAG	AGAGAATCCTCTCGCCATCC	CCACAAAGGGCCGAGTTAAGTTTTGTAAATCCAATAGCCCACGTACTTTGTAGAGATCAATTCCTTGTTAAGAGAATCCTCTCGCCATCC
81	ACAATAGAGTGCATAGCCAAAAGCAACAAAATTGACAAGATCTTAGAGAT	CCACAAAGGGCCGAGTTAAG	AGAGAATCCTCTCGCCATCC	CCACAAAGGGCCGAGTTAAGACAATAGAGTGCATAGCCAAAAGCAACAAAATTGACAAGATCTTAGAGATAGAGAATCCTCTCGCCATCC
82	TACACAGGAAGTACATGAACACCACTACTCAACTAACGGAGAGGATAAAA	CCACAAAGGGCCGAGTTAAG	AGAGAATCCTCTCGCCATCC	CCACAAAGGGCCGAGTTAAGTACACAGGAAGTACATGAACACCACTACTCAACTAACGGAGAGGATAAAAAGAGAATCCTCTCGCCATCC
83	CCAATCCAATTACCATTAACTGCCAGCAACTACTAAATAAAGAAAAGCTC	CCACAAAGGGCCGAGTTAAG	AGAGAATCCTCTCGCCATCC	CCACAAAGGGCCGAGTTAAGCCAATCCAATTACCATTAACTGCCAGCAACTACTAAATAAAGAAAAGCTCAGAGAATCCTCTCGCCATCC
84	AACTAATATTATCTATAGTTTCTGTATTGTGGATGTGGAATGTTGTTTCT	CCACAAAGGGCCGAGTTAAG	AGAGAATCCTCTCGCCATCC	CCACAAAGGGCCGAGTTAAGAACTAATATTATCTATAGTTTCTGTATTGTGGATGTGGAATGTTGTTTCTAGAGAATCCTCTCGCCATCC
85	AAATTCAGTTTGAAGGTTCTGCTTTAGCTATTCATAAATGTACACCTAAA	CCACAAAGGGCCGAGTTAAG	AGAGAATCCTCTCGCCATCC	CCACAAAGGGCCGAGTTAAGAAATTCAGTTTGAAGGTTCTGCTTTAGCTATTCATAAATGTACACCTAAAAGAGAATCCTCTCGCCATCC
86	GCTTGTAAATCCATTGAATTAATAAATGTCATTGAATAGTCATTATTATC	CCACAAAGGGCCGAGTTAAG	AGAGAATCCTCTCGCCATCC	CCACAAAGGGCCGAGTTAAGGCTTGTAAATCCATTGAATTAATAAATGTCATTGAATAGTCATTATTATCAGAGAATCCTCTCGCCATCC
87	ACAAGATTGCAACTTTATCACTAACCCTTATCCAGAAACAATCAGAAAAT	CCACAAAGGGCCGAGTTAAG	AGAGAATCCTCTCGCCATCC	CCACAAAGGGCCGAGTTAAGACAAGATTGCAACTTTATCACTAACCCTTATCCAGAAACAATCAGAAAATAGAGAATCCTCTCGCCATCC
88	AAAGATAAGAGGACATTCCATGACATTTGTGTTTTGGCATAAAACCTCAT	CCACAAAGGGCCGAGTTAAG	AGAGAATCCTCTCGCCATCC	CCACAAAGGGCCGAGTTAAGAAAGATAAGAGGACATTCCATGACATTTGTGTTTTGGCATAAAACCTCATAGAGAATCCTCTCGCCATCC
89	CTCTCCTTTTGGTCCCGGCCGCCTTGATCGAAAATGGACAGGGACATGTG	CCACAAAGGGCCGAGTTAAG	AGAGAATCCTCTCGCCATCC	CCACAAAGGGCCGAGTTAAGCTCTCCTTTTGGTCCCGGCCGCCTTGATCGAAAATGGACAGGGACATGTGAGAGAATCCTCTCGCCATCC
90	AAAAGGTACCTTCTTTGAGCCCTTTAGCGGCACAGACAGAAACCACGGGT	CCACAAAGGGCCGAGTTAAG	AGAGAATCCTCTCGCCATCC	CCACAAAGGGCCGAGTTAAGAAAAGGTACCTTCTTTGAGCCCTTTAGCGGCACAGACAGAAACCACGGGTAGAGAATCCTCTCGCCATCC
91	TTACATGAGGCAAAAGCTTCAACCAAGGATTCTCATTGTACATTCTCTTT	CCACAAAGGGCCGAGTTAAG	AGAGAATCCTCTCGCCATCC	CCACAAAGGGCCGAGTTAAGTTACATGAGGCAAAAGCTTCAACCAAGGATTCTCATTGTACATTCTCTTTAGAGAATCCTCTCGCCATCC
92	AGGAACCATATTGTAGCATCCGTATCTGTAGCAGCATTGACTCAAAATCA	CCACAAAGGGCCGAGTTAAG	AGAGAATCCTCTCGCCATCC	CCACAAAGGGCCGAGTTAAGAGGAACCATATTGTAGCATCCGTATCTGTAGCAGCATTGACTCAAAATCAAGAGAATCCTCTCGCCATCC
93	ACAACCTTTACTATCTTTTGTTTTGTCGATGTAAGTATACAGAGTTTGAC	CCACAAAGGGCCGAGTTAAG	AGAGAATCCTCTCGCCATCC	CCACAAAGGGCCGAGTTAAGACAACCTTTACTATCTTTTGTTTTGTCGATGTAAGTATACAGAGTTTGACAGAGAATCCTCTCGCCATCC
94	GTTTATTTCCTGCAAAATATCTATCTGTCTCGAAGGAATTATTTTGAATA	CCACAAAGGGCCGAGTTAAG	AGAGAATCCTCTCGCCATCC	CCACAAAGGGCCGAGTTAAGGTTTATTTCCTGCAAAATATCTATCTGTCTCGAAGGAATTATTTTGAATAAGAGAATCCTCTCGCCATCC
95	TGAAGAAGTCAAGCACCACATAAAGTTGCACTGGGAAGGCAAGAATAATG	CCACAAAGGGCCGAGTTAAG	AGAGAATCCTCTCGCCATCC	CCACAAAGGGCCGAGTTAAGTGAAGAAGTCAAGCACCACATAAAGTTGCACTGGGAAGGCAAGAATAATGAGAGAATCCTCTCGCCATCC
96	CATTTTGATAAGAACTTTCAAGAATTATAACAGAGTGATTTTGAGGGGTG	CCACAAAGGGCCGAGTTAAG	AGAGAATCCTCTCGCCATCC	CCACAAAGGGCCGAGTTAAGCATTTTGATAAGAACTTTCAAGAATTATAACAGAGTGATTTTGAGGGGTGAGAGAATCCTCTCGCCATCC
97	CACGGTTAGTCTGTCTTGAGAGTATTTCTTTTGTCGGTATCCTTGTTGTG	CCACAAAGGGCCGAGTTAAG	AGAGAATCCTCTCGCCATCC	CCACAAAGGGCCGAGTTAAGCACGGTTAGTCTGTCTTGAGAGTATTTCTTTTGTCGGTATCCTTGTTGTGAGAGAATCCTCTCGCCATCC
98	GGAAGTGACATCTAGATACACACCTTGAAGACAATTATATTTATCATATT	CCACAAAGGGCCGAGTTAAG	AGAGAATCCTCTCGCCATCC	CCACAAAGGGCCGAGTTAAGGGAAGTGACATCTAGATACACACCTTGAAGACAATTATATTTATCATATTAGAGAATCCTCTCGCCATCC
99	TAATCAACTCCTACAAATTTGTTCATGTTATATTTCTGGCTGTACCTGTA	CCACAAAGGGCCGAGTTAAG	AGAGAATCCTCTCGCCATCC	CCACAAAGGGCCGAGTTAAGTAATCAACTCCTACAAATTTGTTCATGTTATATTTCTGGCTGTACCTGTAAGAGAATCCTCTCGCCATCC
100	ATGGGATGAGTGGTGGAACTTTGAACAAACAAAAGATGATTCCAATCCAC	CCACAAAGGGCCGAGTTAAG	AGAGAATCCTCTCGCCATCC	CCACAAAGGGCCGAGTTAAGATGGGATGAGTGGTGGAACTTTGAACAAACAAAAGATGATTCCAATCCACAGAGAATCCTCTCGCCATCC
101	CTTTTCATTTTCATTTGATATGTAAGAGGGATACTTGAAGGAAACTTAAC	CCACAAAGGGCCGAGTTAAG	AGAGAATCCTCTCGCCATCC	CCACAAAGGGCCGAGTTAAGCTTTTCATTTTCATTTGATATGTAAGAGGGATACTTGAAGGAAACTTAACAGAGAATCCTCTCGCCATCC
102	GAAGCTACCATATCTGACAAGAGACATGCAGTAGAGATTAAAGCAATGTA	CCACAAAGGGCCGAGTTAAG	AGAGAATCCTCTCGCCATCC	CCACAAAGGGCCGAGTTAAGGAAGCTACCATATCTGACAAGAGACATGCAGTAGAGATTAAAGCAATGTAAGAGAATCCTCTCGCCATCC
103	TACTAAATGGGGAGAGAACTCAAATATTCAGTTTCTGGAGAATCATATGG	CCACAAAGGGCCGAGTTAAG	AGAGAATCCTCTCGCCATCC	CCACAAAGGGCCGAGTTAAGTACTAAATGGGGAGAGAACTCAAATATTCAGTTTCTGGAGAATCATATGGAGAGAATCCTCTCGCCATCC
104	GTCTTTGAAAGGAAAGGCGTAACCCAGAAATAGATGCTTTCGATTGCTTG	CCACAAAGGGCCGAGTTAAG	AGAGAATCCTCTCGCCATCC	CCACAAAGGGCCGAGTTAAGGTCTTTGAAAGGAAAGGCGTAACCCAGAAATAGATGCTTTCGATTGCTTGAGAGAATCCTCTCGCCATCC
105	TCATATACATCTTCGCTTATTCATTCAATATTGTCAAACACTAGCTAGCT	CCACAAAGGGCCGAGTTAAG	AGAGAATCCTCTCGCCATCC	CCACAAAGGGCCGAGTTAAGTCATATACATCTTCGCTTATTCATTCAATATTGTCAAACACTAGCTAGCTAGAGAATCCTCTCGCCATCC
106	AGGAACGAAACCTGGCTCTGATTTGAGAGTAAAAGCTTCTTATGCCATTC	CCACAAAGGGCCGAGTTAAG	AGAGAATCCTCTCGCCATCC	CCACAAAGGGCCGAGTTAAGAGGAACGAAACCTGGCTCTGATTTGAGAGTAAAAGCTTCTTATGCCATTCAGAGAATCCTCTCGCCATCC
107	AATAATCCGTTTACTATAAAATAATAAACCATAAGAACCACCACAACCTA	CCACAAAGGGCCGAGTTAAG	AGAGAATCCTCTCGCCATCC	CCACAAAGGGCCGAGTTAAGAATAATCCGTTTACTATAAAATAATAAACCATAAGAACCACCACAACCTAAGAGAATCCTCTCGCCATCC
108	GCCCTGTACATTTAAGATATTAATTACATTGCAACAAATAGTAGATATGG	CCACAAAGGGCCGAGTTAAG	AGAGAATCCTCTCGCCATCC	CCACAAAGGGCCGAGTTAAGGCCCTGTACATTTAAGATATTAATTACATTGCAACAAATAGTAGATATGGAGAGAATCCTCTCGCCATCC
109	AAATATTTTACAAACTAACTAGACCGAATCTAATTCCGAAATATAGAGCT	CCACAAAGGGCCGAGTTAAG	AGAGAATCCTCTCGCCATCC	CCACAAAGGGCCGAGTTAAGAAATATTTTACAAACTAACTAGACCGAATCTAATTCCGAAATATAGAGCTAGAGAATCCTCTCGCCATCC
110	TCAATTGCATTTGGGAGTTGGTCGACATTTTGCGGTTGATTCAGGTGGGA	CCACAAAGGGCCGAGTTAAG	AGAGAATCCTCTCGCCATCC	CCACAAAGGGCCGAGTTAAGTCAATTGCATTTGGGAGTTGGTCGACATTTTGCGGTTGATTCAGGTGGGAAGAGAATCCTCTCGCCATCC
111	AAATACAACTGAAGATACAAACTGGGAAGCTGAGGGTGATAAATTTAGGT	CCACAAAGGGCCGAGTTAAG	AGAGAATCCTCTCGCCATCC	CCACAAAGGGCCGAGTTAAGAAATACAACTGAAGATACAAACTGGGAAGCTGAGGGTGATAAATTTAGGTAGAGAATCCTCTCGCCATCC
112	AAATAACCTGTAAATATGATTTATGCAAGTGTTTGTTCGGTAAGCTGTAG	CCACAAAGGGCCGAGTTAAG	AGAGAATCCTCTCGCCATCC	CCACAAAGGGCCGAGTTAAGAAATAACCTGTAAATATGATTTATGCAAGTGTTTGTTCGGTAAGCTGTAGAGAGAATCCTCTCGCCATCC
113	TATTTATTTTCACCTGGTCAACTTTTGGATTTGGCAAATTGACTTTTCTT	CCACAAAGGGCCGAGTTAAG	AGAGAATCCTCTCGCCATCC	CCACAAAGGGCCGAGTTAAGTATTTATTTTCACCTGGTCAACTTTTGGATTTGGCAAATTGACTTTTCTTAGAGAATCCTCTCGCCATCC
114	ATTGTCAGCAGAATCTTTTATGTCGTCTATTAGATTTAGTATTGCAATAG	CCACAAAGGGCCGAGTTAAG	AGAGAATCCTCTCGCCATCC	CCACAAAGGGCCGAGTTAAGATTGTCAGCAGAATCTTTTATGTCGTCTATTAGATTTAGTATTGCAATAGAGAGAATCCTCTCGCCATCC
115	GTCAGTAATGTAACAAACCTAATTGATCTTCTTAATCATCTTACATTAAG	CCACAAAGGGCCGAGTTAAG	AGAGAATCCTCTCGCCATCC	CCACAAAGGGCCGAGTTAAGGTCAGTAATGTAACAAACCTAATTGATCTTCTTAATCATCTTACATTAAGAGAGAATCCTCTCGCCATCC
116	CAGAAAAGAAAGGTTTACTCAAGACGGAGAAGGAAGGTGATACCGGTGGT	CCACAAAGGGCCGAGTTAAG	AGAGAATCCTCTCGCCATCC	CCACAAAGGGCCGAGTTAAGCAGAAAAGAAAGGTTTACTCAAGACGGAGAAGGAAGGTGATACCGGTGGTAGAGAATCCTCTCGCCATCC
117	AAGGATAATATGCAGAGAACAGTTTACAAGTAACAATAATACACCAGAAA	CCACAAAGGGCCGAGTTAAG	AGAGAATCCTCTCGCCATCC	CCACAAAGGGCCGAGTTAAGAAGGATAATATGCAGAGAACAGTTTACAAGTAACAATAATACACCAGAAAAGAGAATCCTCTCGCCATCC
118	AGGAACTGTATACCCCTTGGTTTGCCATTTCTGATCATCCAAATTTGTCT	CCACAAAGGGCCGAGTTAAG	AGAGAATCCTCTCGCCATCC	CCACAAAGGGCCGAGTTAAGAGGAACTGTATACCCCTTGGTTTGCCATTTCTGATCATCCAAATTTGTCTAGAGAATCCTCTCGCCATCC
119	ACCACGCTAATTGAAGGCATATATTGAAGCAAGTCGAGAAGTAAAGGGAG	CCACAAAGGGCCGAGTTAAG	AGAGAATCCTCTCGCCATCC	CCACAAAGGGCCGAGTTAAGACCACGCTAATTGAAGGCATATATTGAAGCAAGTCGAGAAGTAAAGGGAGAGAGAATCCTCTCGCCATCC
120	GAGTGGCTATGCAGTTTGGATTTGATCAAGACATTCCCGGCCGGATTCGT	CCACAAAGGGCCGAGTTAAG	AGAGAATCCTCTCGCCATCC	CCACAAAGGGCCGAGTTAAGGAGTGGCTATGCAGTTTGGATTTGATCAAGACATTCCCGGCCGGATTCGTAGAGAATCCTCTCGCCATCC
121	AATTGATCTCCTAGTACTATTAATCTGTTCGAGACTGTCAAAACTGTAAC	CCACAAAGGGCCGAGTTAAG	AGAGAATCCTCTCGCCATCC	CCACAAAGGGCCGAGTTAAGAATTGATCTCCTAGTACTATTAATCTGTTCGAGACTGTCAAAACTGTAACAGAGAATCCTCTCGCCATCC
122	AGTTAGGTGTCTAAATGTGCCCCAATACAAACAAACATGAAAATAGCATG	CCACAAAGGGCCGAGTTAAG	AGAGAATCCTCTCGCCATCC	CCACAAAGGGCCGAGTTAAGAGTTAGGTGTCTAAATGTGCCCCAATACAAACAAACATGAAAATAGCATGAGAGAATCCTCTCGCCATCC
123	CAAATGGAAAGTTGAAGATGTTGGGGAGGTTATTGATGCTGCTGGTGATG	CCACAAAGGGCCGAGTTAAG	AGAGAATCCTCTCGCCATCC	CCACAAAGGGCCGAGTTAAGCAAATGGAAAGTTGAAGATGTTGGGGAGGTTATTGATGCTGCTGGTGATGAGAGAATCCTCTCGCCATCC
124	TTGATCTACTAACATGACCCGGAAGATCTTGATCATATCCAAATTGTAAT	CCACAAAGGGCCGAGTTAAG	AGAGAATCCTCTCGCCATCC	CCACAAAGGGCCGAGTTAAGTTGATCTACTAACATGACCCGGAAGATCTTGATCATATCCAAATTGTAATAGAGAATCCTCTCGCCATCC
125	TAAAGGTTAAGGATCAGGCTCGTGTCAACTATCTTGCTACCTTCACCCAA	CCACAAAGGGCCGAGTTAAG	AGAGAATCCTCTCGCCATCC	CCACAAAGGGCCGAGTTAAGTAAAGGTTAAGGATCAGGCTCGTGTCAACTATCTTGCTACCTTCACCCAAAGAGAATCCTCTCGCCATCC
126	TATCTTTGCTTTCAAGATATCCTTTATATACTTTTCCAAAACCTCCTTCT	CCACAAAGGGCCGAGTTAAG	AGAGAATCCTCTCGCCATCC	CCACAAAGGGCCGAGTTAAGTATCTTTGCTTTCAAGATATCCTTTATATACTTTTCCAAAACCTCCTTCTAGAGAATCCTCTCGCCATCC
127	GCACCTCTATCTCTCTCTCGATTTTGCCTTTGTGTTTCCATTTGATGAAG	CCACAAAGGGCCGAGTTAAG	AGAGAATCCTCTCGCCATCC	CCACAAAGGGCCGAGTTAAGGCACCTCTATCTCTCTCTCGATTTTGCCTTTGTGTTTCCATTTGATGAAGAGAGAATCCTCTCGCCATCC
128	AATAACATCTTACCTACTCAAAACCCAACGGATAAATTTGTGGGAGGTCT	CCACAAAGGGCCGAGTTAAG	AGAGAATCCTCTCGCCATCC	CCACAAAGGGCCGAGTTAAGAATAACATCTTACCTACTCAAAACCCAACGGATAAATTTGTGGGAGGTCTAGAGAATCCTCTCGCCATCC
129	AACCGGTCAGTTAACAACAAAATCCGATGTCTATAGCTTTGGAGTTGTGT	CCACAAAGGGCCGAGTTAAG	AGAGAATCCTCTCGCCATCC	CCACAAAGGGCCGAGTTAAGAACCGGTCAGTTAACAACAAAATCCGATGTCTATAGCTTTGGAGTTGTGTAGAGAATCCTCTCGCCATCC
130	TGGTGTTATTTACAATAATGTTCTTATAATAGACAATGCCTCTATTGCTG	CCACAAAGGGCCGAGTTAAG	AGAGAATCCTCTCGCCATCC	CCACAAAGGGCCGAGTTAAGTGGTGTTATTTACAATAATGTTCTTATAATAGACAATGCCTCTATTGCTGAGAGAATCCTCTCGCCATCC
131	AATAGCCAATCCATAACTCGCGCTTTTCATTTTGCAATTCTTCAACGGAA	CCACAAAGGGCCGAGTTAAG	AGAGAATCCTCTCGCCATCC	CCACAAAGGGCCGAGTTAAGAATAGCCAATCCATAACTCGCGCTTTTCATTTTGCAATTCTTCAACGGAAAGAGAATCCTCTCGCCATCC
132	ATATTGATATAGGTTAGTAGTTATAGAAATTTCTGTAGAGTTCTATCTGC	CCACAAAGGGCCGAGTTAAG	AGAGAATCCTCTCGCCATCC	CCACAAAGGGCCGAGTTAAGATATTGATATAGGTTAGTAGTTATAGAAATTTCTGTAGAGTTCTATCTGCAGAGAATCCTCTCGCCATCC
133	ATGTTATTTGTAGAACCGATGCTGCTAGATTTTGTGTGTGTTTCCTTTTA	CCACAAAGGGCCGAGTTAAG	AGAGAATCCTCTCGCCATCC	CCACAAAGGGCCGAGTTAAGATGTTATTTGTAGAACCGATGCTGCTAGATTTTGTGTGTGTTTCCTTTTAAGAGAATCCTCTCGCCATCC
134	CCTCCAAAGGTTGTAGTTATTGTCAAGAACCATTGTGGGAACTAGTCAAC	CCACAAAGGGCCGAGTTAAG	AGAGAATCCTCTCGCCATCC	CCACAAAGGGCCGAGTTAAGCCTCCAAAGGTTGTAGTTATTGTCAAGAACCATTGTGGGAACTAGTCAACAGAGAATCCTCTCGCCATCC
135	GCATAAAACAACATCATAAAAGACACAAACACAATTACTGCTACACTAAT	CCACAAAGGGCCGAGTTAAG	AGAGAATCCTCTCGCCATCC	CCACAAAGGGCCGAGTTAAGGCATAAAACAACATCATAAAAGACACAAACACAATTACTGCTACACTAATAGAGAATCCTCTCGCCATCC
136	GAGCACTAAACACAAGTTCTAGATAATCATTAGTGGACTTCTTTGATGAA	CCACAAAGGGCCGAGTTAAG	AGAGAATCCTCTCGCCATCC	CCACAAAGGGCCGAGTTAAGGAGCACTAAACACAAGTTCTAGATAATCATTAGTGGACTTCTTTGATGAAAGAGAATCCTCTCGCCATCC
137	TTGTCGTTCTTCAACTTCACATACTGAGAGAACTTTTGATTGTTTCAAAT	CCACAAAGGGCCGAGTTAAG	AGAGAATCCTCTCGCCATCC	CCACAAAGGGCCGAGTTAAGTTGTCGTTCTTCAACTTCACATACTGAGAGAACTTTTGATTGTTTCAAATAGAGAATCCTCTCGCCATCC
138	TCCATTCCAGGACAGCAATGAACATGTATCCACATATTCGTAAAGCCATT	CCACAAAGGGCCGAGTTAAG	AGAGAATCCTCTCGCCATCC	CCACAAAGGGCCGAGTTAAGTCCATTCCAGGACAGCAATGAACATGTATCCACATATTCGTAAAGCCATTAGAGAATCCTCTCGCCATCC
139	GTATAAAATAGGGTTGAAGAGCAAATTTTGTCAGAGATATAGGGAACTGT	CCACAAAGGGCCGAGTTAAG	AGAGAATCCTCTCGCCATCC	CCACAAAGGGCCGAGTTAAGGTATAAAATAGGGTTGAAGAGCAAATTTTGTCAGAGATATAGGGAACTGTAGAGAATCCTCTCGCCATCC
140	TCTGCAGGTATTTACTTCAACACTGTCAGTAACATCCAGTAGAATCTTTT	CCACAAAGGGCCGAGTTAAG	AGAGAATCCTCTCGCCATCC	CCACAAAGGGCCGAGTTAAGTCTGCAGGTATTTACTTCAACACTGTCAGTAACATCCAGTAGAATCTTTTAGAGAATCCTCTCGCCATCC
141	ACTTGTTTAAAGGCACCAGAGAAAGTCCCCTGCTTTTCAAGAAATGTTTC	CCACAAAGGGCCGAGTTAAG	AGAGAATCCTCTCGCCATCC	CCACAAAGGGCCGAGTTAAGACTTGTTTAAAGGCACCAGAGAAAGTCCCCTGCTTTTCAAGAAATGTTTCAGAGAATCCTCTCGCCATCC
142	ATGAGGTAGTTATCGAGGTTTTACATGCCATTTCACAATTTCTGCTGGAA	CCACAAAGGGCCGAGTTAAG	AGAGAATCCTCTCGCCATCC	CCACAAAGGGCCGAGTTAAGATGAGGTAGTTATCGAGGTTTTACATGCCATTTCACAATTTCTGCTGGAAAGAGAATCCTCTCGCCATCC
143	ATCCCCAGTTGACAAAACATCAGCAAAAGCTGTGTCCATATCACCAACAT	CCACAAAGGGCCGAGTTAAG	AGAGAATCCTCTCGCCATCC	CCACAAAGGGCCGAGTTAAGATCCCCAGTTGACAAAACATCAGCAAAAGCTGTGTCCATATCACCAACATAGAGAATCCTCTCGCCATCC
144	AGTTCGAGCAGCTACATTGTCTTCACCAGCCACACGAATTGCTTCCAAGG	CCACAAAGGGCCGAGTTAAG	AGAGAATCCTCTCGCCATCC	CCACAAAGGGCCGAGTTAAGAGTTCGAGCAGCTACATTGTCTTCACCAGCCACACGAATTGCTTCCAAGGAGAGAATCCTCTCGCCATCC
145	CCTCTCTCCAAAGGAAACACGTCCATCATTCCCAATCCCTAACTTGGCAC	CCACAAAGGGCCGAGTTAAG	AGAGAATCCTCTCGCCATCC	CCACAAAGGGCCGAGTTAAGCCTCTCTCCAAAGGAAACACGTCCATCATTCCCAATCCCTAACTTGGCACAGAGAATCCTCTCGCCATCC
146	TTATGGGTGGATTTGATGGGTCTTCTTCTAATAGAACCATAGGTAAGTAC	CCACAAAGGGCCGAGTTAAG	AGAGAATCCTCTCGCCATCC	CCACAAAGGGCCGAGTTAAGTTATGGGTGGATTTGATGGGTCTTCTTCTAATAGAACCATAGGTAAGTACAGAGAATCCTCTCGCCATCC
147	GAGTTGTTGAAGACATGGCACGCGATTTGTCAATATCTACAGGTCGAAGA	CCACAAAGGGCCGAGTTAAG	AGAGAATCCTCTCGCCATCC	CCACAAAGGGCCGAGTTAAGGAGTTGTTGAAGACATGGCACGCGATTTGTCAATATCTACAGGTCGAAGAAGAGAATCCTCTCGCCATCC
148	AAGAACTCTGGGTTTAATTCCTTATCAGTTAATGCTGGTGTCTTCTTCCT	CCACAAAGGGCCGAGTTAAG	AGAGAATCCTCTCGCCATCC	CCACAAAGGGCCGAGTTAAGAAGAACTCTGGGTTTAATTCCTTATCAGTTAATGCTGGTGTCTTCTTCCTAGAGAATCCTCTCGCCATCC
149	TTCATTATCACCCTTGTTATATATGACTTCTTGTTCATATCTAGTTCATA	CCACAAAGGGCCGAGTTAAG	AGAGAATCCTCTCGCCATCC	CCACAAAGGGCCGAGTTAAGTTCATTATCACCCTTGTTATATATGACTTCTTGTTCATATCTAGTTCATAAGAGAATCCTCTCGCCATCC
150	GTCTTTTGCCAAAATAAGAGTATCCTAGTTAGAGCCAAAGTAGCAAAACT	CCACAAAGGGCCGAGTTAAG	AGAGAATCCTCTCGCCATCC	CCACAAAGGGCCGAGTTAAGGTCTTTTGCCAAAATAAGAGTATCCTAGTTAGAGCCAAAGTAGCAAAACTAGAGAATCCTCTCGCCATCC
151	CATGTCAATTTCAATTATCTTATCTTTCAAAGTTATTTAACCAGAATAAA	CCACAAAGGGCCGAGTTAAG	AGAGAATCCTCTCGCCATCC	CCACAAAGGGCCGAGTTAAGCATGTCAATTTCAATTATCTTATCTTTCAAAGTTATTTAACCAGAATAAAAGAGAATCCTCTCGCCATCC
152	TAAACCCGCTGTCAGAAAAGAATCTCTCCGTCTCCTTGCCCTCCTCTGTG	CCACAAAGGGCCGAGTTAAG	AGAGAATCCTCTCGCCATCC	CCACAAAGGGCCGAGTTAAGTAAACCCGCTGTCAGAAAAGAATCTCTCCGTCTCCTTGCCCTCCTCTGTGAGAGAATCCTCTCGCCATCC
153	AATTATAGCATCCAATCCATCCCTATCAAAGCCCAAAACATACAAAATTC	CCACAAAGGGCCGAGTTAAG	AGAGAATCCTCTCGCCATCC	CCACAAAGGGCCGAGTTAAGAATTATAGCATCCAATCCATCCCTATCAAAGCCCAAAACATACAAAATTCAGAGAATCCTCTCGCCATCC
154	AAGCTTTGACTTGACTGGGTATTATTCAATTACAATAATAGTTTAAAGAT	CCACAAAGGGCCGAGTTAAG	AGAGAATCCTCTCGCCATCC	CCACAAAGGGCCGAGTTAAGAAGCTTTGACTTGACTGGGTATTATTCAATTACAATAATAGTTTAAAGATAGAGAATCCTCTCGCCATCC
155	AAAAGTTTTACTTCAACTACATATGATTTATTACCATCCAATTCAAGGTT	CCACAAAGGGCCGAGTTAAG	AGAGAATCCTCTCGCCATCC	CCACAAAGGGCCGAGTTAAGAAAAGTTTTACTTCAACTACATATGATTTATTACCATCCAATTCAAGGTTAGAGAATCCTCTCGCCATCC
156	TGGTTTCTGTTTTGGTTGCGTCAATTGAAGGTGGAGAGATGGAAACGAAA	CCACAAAGGGCCGAGTTAAG	AGAGAATCCTCTCGCCATCC	CCACAAAGGGCCGAGTTAAGTGGTTTCTGTTTTGGTTGCGTCAATTGAAGGTGGAGAGATGGAAACGAAAAGAGAATCCTCTCGCCATCC
157	TATATATTTAAATCAGTTGTTCCATTTAGATTTATGTAAGTTGCTTCAAA	CCACAAAGGGCCGAGTTAAG	AGAGAATCCTCTCGCCATCC	CCACAAAGGGCCGAGTTAAGTATATATTTAAATCAGTTGTTCCATTTAGATTTATGTAAGTTGCTTCAAAAGAGAATCCTCTCGCCATCC
158	AGAAACTTCAAGAACAGCCAAGAACGCAACCAACACCACCGTCACAATCG	CCACAAAGGGCCGAGTTAAG	AGAGAATCCTCTCGCCATCC	CCACAAAGGGCCGAGTTAAGAGAAACTTCAAGAACAGCCAAGAACGCAACCAACACCACCGTCACAATCGAGAGAATCCTCTCGCCATCC
159	ACATTGCCTCTGCTGCTGCTGCTCCTCCTGCTGGTGTTGTTGGTTAACGT	CCACAAAGGGCCGAGTTAAG	AGAGAATCCTCTCGCCATCC	CCACAAAGGGCCGAGTTAAGACATTGCCTCTGCTGCTGCTGCTCCTCCTGCTGGTGTTGTTGGTTAACGTAGAGAATCCTCTCGCCATCC
160	GGGACAGCAAGGACAAGAAGGACAGCAGGGACGACAGGGACAGGAGCAAC	CCACAAAGGGCCGAGTTAAG	AGAGAATCCTCTCGCCATCC	CCACAAAGGGCCGAGTTAAGGGGACAGCAAGGACAAGAAGGACAGCAGGGACGACAGGGACAGGAGCAACAGAGAATCCTCTCGCCATCC
161	AATAATTTTGTTGCTTATGTTAATCTATTTGGATTTTAGCATTGATATTA	CCACAAAGGGCCGAGTTAAG	AGAGAATCCTCTCGCCATCC	CCACAAAGGGCCGAGTTAAGAATAATTTTGTTGCTTATGTTAATCTATTTGGATTTTAGCATTGATATTAAGAGAATCCTCTCGCCATCC
162	TGACCCAATAGAATGTGAATATGGATTAATTAGGGGTGAATTACAATGCA	CCACAAAGGGCCGAGTTAAG	AGAGAATCCTCTCGCCATCC	CCACAAAGGGCCGAGTTAAGTGACCCAATAGAATGTGAATATGGATTAATTAGGGGTGAATTACAATGCAAGAGAATCCTCTCGCCATCC
163	ACATCATCTACCATCATAATTTAAATAAACCAAGAATAATATTCCCTCCA	CCACAAAGGGCCGAGTTAAG	AGAGAATCCTCTCGCCATCC	CCACAAAGGGCCGAGTTAAGACATCATCTACCATCATAATTTAAATAAACCAAGAATAATATTCCCTCCAAGAGAATCCTCTCGCCATCC
164	TGCGTACACTTTCCAGAATATCAGGGGAAGAAATAGTAGAAAATTGAACT	CCACAAAGGGCCGAGTTAAG	AGAGAATCCTCTCGCCATCC	CCACAAAGGGCCGAGTTAAGTGCGTACACTTTCCAGAATATCAGGGGAAGAAATAGTAGAAAATTGAACTAGAGAATCCTCTCGCCATCC
165	TAAGATATTGTGTTGTAGCTTTCAAAACTTTACCTATAAATTGAATTAAC	CCACAAAGGGCCGAGTTAAG	AGAGAATCCTCTCGCCATCC	CCACAAAGGGCCGAGTTAAGTAAGATATTGTGTTGTAGCTTTCAAAACTTTACCTATAAATTGAATTAACAGAGAATCCTCTCGCCATCC
166	TGTTTGGCACTTATTATAAACAATGTCATGTATAAGATAAAATAGATTTT	CCACAAAGGGCCGAGTTAAG	AGAGAATCCTCTCGCCATCC	CCACAAAGGGCCGAGTTAAGTGTTTGGCACTTATTATAAACAATGTCATGTATAAGATAAAATAGATTTTAGAGAATCCTCTCGCCATCC
167	TGTATATGTATGTATAGTATTGATGATAGATATTTTGAACTATGTTGTTG	CCACAAAGGGCCGAGTTAAG	AGAGAATCCTCTCGCCATCC	CCACAAAGGGCCGAGTTAAGTGTATATGTATGTATAGTATTGATGATAGATATTTTGAACTATGTTGTTGAGAGAATCCTCTCGCCATCC
168	AGGGTAAAGAAGGGTATCTATTCTACAATGGCCACACAATTGGAATCAAT	CCACAAAGGGCCGAGTTAAG	AGAGAATCCTCTCGCCATCC	CCACAAAGGGCCGAGTTAAGAGGGTAAAGAAGGGTATCTATTCTACAATGGCCACACAATTGGAATCAATAGAGAATCCTCTCGCCATCC
169	AAATATAATAGTTAAGAGACTTAGGACAAATGTAATAGAACATCACCAAT	CCACAAAGGGCCGAGTTAAG	AGAGAATCCTCTCGCCATCC	CCACAAAGGGCCGAGTTAAGAAATATAATAGTTAAGAGACTTAGGACAAATGTAATAGAACATCACCAATAGAGAATCCTCTCGCCATCC
170	ATGTAAAATTTACAAGGGTATTATAGTTATTTGCAAATTACTCGCTCAAA	CCACAAAGGGCCGAGTTAAG	AGAGAATCCTCTCGCCATCC	CCACAAAGGGCCGAGTTAAGATGTAAAATTTACAAGGGTATTATAGTTATTTGCAAATTACTCGCTCAAAAGAGAATCCTCTCGCCATCC
171	TTAAGTAACTATTGTAAACATGATATTCGAAAAGTATGCCAATATATAGT	CCACAAAGGGCCGAGTTAAG	AGAGAATCCTCTCGCCATCC	CCACAAAGGGCCGAGTTAAGTTAAGTAACTATTGTAAACATGATATTCGAAAAGTATGCCAATATATAGTAGAGAATCCTCTCGCCATCC
172	TTCTTTTCTTGTTCATCTCCTACATACTTTACCTACAAAATACATAAATA	CCACAAAGGGCCGAGTTAAG	AGAGAATCCTCTCGCCATCC	CCACAAAGGGCCGAGTTAAGTTCTTTTCTTGTTCATCTCCTACATACTTTACCTACAAAATACATAAATAAGAGAATCCTCTCGCCATCC
173	TTTGTGTTTCATTTTCCCCTTTCTTTGGCTTGATTGCAGTGTAATTGGAT	CCACAAAGGGCCGAGTTAAG	AGAGAATCCTCTCGCCATCC	CCACAAAGGGCCGAGTTAAGTTTGTGTTTCATTTTCCCCTTTCTTTGGCTTGATTGCAGTGTAATTGGATAGAGAATCCTCTCGCCATCC
174	GTTGATGATTATGTGGTTTTAATACCTGATTCCACTTTCTTGCTTCACTG	CCACAAAGGGCCGAGTTAAG	AGAGAATCCTCTCGCCATCC	CCACAAAGGGCCGAGTTAAGGTTGATGATTATGTGGTTTTAATACCTGATTCCACTTTCTTGCTTCACTGAGAGAATCCTCTCGCCATCC
175	TCCGAAACAGAGGTGTAATTGTAAATGTTTGTAATAATTTCAAAAGAGGG	CCACAAAGGGCCGAGTTAAG	AGAGAATCCTCTCGCCATCC	CCACAAAGGGCCGAGTTAAGTCCGAAACAGAGGTGTAATTGTAAATGTTTGTAATAATTTCAAAAGAGGGAGAGAATCCTCTCGCCATCC
176	GTGGACTGTTCAACGCAATTTGACTATTGGTGAACCCATTATTGACTTCT	CCACAAAGGGCCGAGTTAAG	AGAGAATCCTCTCGCCATCC	CCACAAAGGGCCGAGTTAAGGTGGACTGTTCAACGCAATTTGACTATTGGTGAACCCATTATTGACTTCTAGAGAATCCTCTCGCCATCC
177	AAATGGGCAAGAGAAATTGACTGGCTGCTTGGAGTGATTTTGAGATTCAA	CCACAAAGGGCCGAGTTAAG	AGAGAATCCTCTCGCCATCC	CCACAAAGGGCCGAGTTAAGAAATGGGCAAGAGAAATTGACTGGCTGCTTGGAGTGATTTTGAGATTCAAAGAGAATCCTCTCGCCATCC
178	AAAATTAAGAGACATGGACAGTTTATTATCTTAACTCAACCATTGTGTAA	CCACAAAGGGCCGAGTTAAG	AGAGAATCCTCTCGCCATCC	CCACAAAGGGCCGAGTTAAGAAAATTAAGAGACATGGACAGTTTATTATCTTAACTCAACCATTGTGTAAAGAGAATCCTCTCGCCATCC
179	TTGGCTACATTATGAATATGAATTTCCTAGAGAAGATGTGTTTCTTTGTG	CCACAAAGGGCCGAGTTAAG	AGAGAATCCTCTCGCCATCC	CCACAAAGGGCCGAGTTAAGTTGGCTACATTATGAATATGAATTTCCTAGAGAAGATGTGTTTCTTTGTGAGAGAATCCTCTCGCCATCC
180	AAGAATCAATTCAATGAAAACCAGCGAAAAGTGATTCCATTTGGCTACTT	CCACAAAGGGCCGAGTTAAG	AGAGAATCCTCTCGCCATCC	CCACAAAGGGCCGAGTTAAGAAGAATCAATTCAATGAAAACCAGCGAAAAGTGATTCCATTTGGCTACTTAGAGAATCCTCTCGCCATCC
181	AAAGTGCCAAACAGAACACGAATTAGTTATGAAAGGATGAAGGACGAATA	CCACAAAGGGCCGAGTTAAG	AGAGAATCCTCTCGCCATCC	CCACAAAGGGCCGAGTTAAGAAAGTGCCAAACAGAACACGAATTAGTTATGAAAGGATGAAGGACGAATAAGAGAATCCTCTCGCCATCC
182	AGTGCTAATTTTCTATTGCTTACTTTGTTTCATAGCTCCCTCATTGGAAC	CCACAAAGGGCCGAGTTAAG	AGAGAATCCTCTCGCCATCC	CCACAAAGGGCCGAGTTAAGAGTGCTAATTTTCTATTGCTTACTTTGTTTCATAGCTCCCTCATTGGAACAGAGAATCCTCTCGCCATCC
183	TATCGTTCTTCAGTGAGAGAGAAACAAAATAATCATACTAGGTCGCCAAG	CCACAAAGGGCCGAGTTAAG	AGAGAATCCTCTCGCCATCC	CCACAAAGGGCCGAGTTAAGTATCGTTCTTCAGTGAGAGAGAAACAAAATAATCATACTAGGTCGCCAAGAGAGAATCCTCTCGCCATCC
184	TTGGTGCATATATCCTCAGCTTCACTTGTAAACAATATATTTCCTCTCCT	CCACAAAGGGCCGAGTTAAG	AGAGAATCCTCTCGCCATCC	CCACAAAGGGCCGAGTTAAGTTGGTGCATATATCCTCAGCTTCACTTGTAAACAATATATTTCCTCTCCTAGAGAATCCTCTCGCCATCC
185	GAGGTAAACTATTATAGTTACATATAAACTATGCTAAAATCTACCTTTTG	CCACAAAGGGCCGAGTTAAG	AGAGAATCCTCTCGCCATCC	CCACAAAGGGCCGAGTTAAGGAGGTAAACTATTATAGTTACATATAAACTATGCTAAAATCTACCTTTTGAGAGAATCCTCTCGCCATCC
186	ATCATGGATAATATAATTAGACTATTTATAATATTATAAGAATATTCAAA	CCACAAAGGGCCGAGTTAAG	AGAGAATCCTCTCGCCATCC	CCACAAAGGGCCGAGTTAAGATCATGGATAATATAATTAGACTATTTATAATATTATAAGAATATTCAAAAGAGAATCCTCTCGCCATCC
187	TGTGCACCTGTGTGATTTAGATCTTCCCTCTTAAAGAAAATATGTGGCCC	CCACAAAGGGCCGAGTTAAG	AGAGAATCCTCTCGCCATCC	CCACAAAGGGCCGAGTTAAGTGTGCACCTGTGTGATTTAGATCTTCCCTCTTAAAGAAAATATGTGGCCCAGAGAATCCTCTCGCCATCC
188	ACTGATTGAATGAGGCTCAATTATCTGCCCATCATCATCCTGTAACAAAT	CCACAAAGGGCCGAGTTAAG	AGAGAATCCTCTCGCCATCC	CCACAAAGGGCCGAGTTAAGACTGATTGAATGAGGCTCAATTATCTGCCCATCATCATCCTGTAACAAATAGAGAATCCTCTCGCCATCC
189	CATCATCTGTGACACTATAATACTCAGCACGCCCCATATCCTTCAGAAAA	CCACAAAGGGCCGAGTTAAG	AGAGAATCCTCTCGCCATCC	CCACAAAGGGCCGAGTTAAGCATCATCTGTGACACTATAATACTCAGCACGCCCCATATCCTTCAGAAAAAGAGAATCCTCTCGCCATCC
190	CCTACGAAACCTAGATGAACCATATTTTCTTAATTGCAGAACCAAAACAG	CCACAAAGGGCCGAGTTAAG	AGAGAATCCTCTCGCCATCC	CCACAAAGGGCCGAGTTAAGCCTACGAAACCTAGATGAACCATATTTTCTTAATTGCAGAACCAAAACAGAGAGAATCCTCTCGCCATCC
191	AAGTTACACCTTCCTCAGCCCTCTTCTGTTTTCTCATTGCTTTGCCTGTA	CCACAAAGGGCCGAGTTAAG	AGAGAATCCTCTCGCCATCC	CCACAAAGGGCCGAGTTAAGAAGTTACACCTTCCTCAGCCCTCTTCTGTTTTCTCATTGCTTTGCCTGTAAGAGAATCCTCTCGCCATCC
192	TTAACTATTGGAAAGGTAAGTTAAGGCAAATGATATCTCAATTCAGGGAA	CCACAAAGGGCCGAGTTAAG	AGAGAATCCTCTCGCCATCC	CCACAAAGGGCCGAGTTAAGTTAACTATTGGAAAGGTAAGTTAAGGCAAATGATATCTCAATTCAGGGAAAGAGAATCCTCTCGCCATCC
193	TTTATTTGAGAAAACTTGTTATTGGTCTCCATTACATTCTTTCCCAAAGG	CCACAAAGGGCCGAGTTAAG	AGAGAATCCTCTCGCCATCC	CCACAAAGGGCCGAGTTAAGTTTATTTGAGAAAACTTGTTATTGGTCTCCATTACATTCTTTCCCAAAGGAGAGAATCCTCTCGCCATCC
194	GATCCAAGGTTTTCAGACACAAAGAGATCTCGAGGTTTTCCCAAGAATTT	CCACAAAGGGCCGAGTTAAG	AGAGAATCCTCTCGCCATCC	CCACAAAGGGCCGAGTTAAGGATCCAAGGTTTTCAGACACAAAGAGATCTCGAGGTTTTCCCAAGAATTTAGAGAATCCTCTCGCCATCC
195	CTCTGTAGAAAACCAAACCAACCAACCACTACCACTTTGTGATTATAGTT	CCACAAAGGGCCGAGTTAAG	AGAGAATCCTCTCGCCATCC	CCACAAAGGGCCGAGTTAAGCTCTGTAGAAAACCAAACCAACCAACCACTACCACTTTGTGATTATAGTTAGAGAATCCTCTCGCCATCC
196	TTCGACAACAAAATTTCCAATTGTAAATGGGACAGAATCTTTGTTTGGCA	CCACAAAGGGCCGAGTTAAG	AGAGAATCCTCTCGCCATCC	CCACAAAGGGCCGAGTTAAGTTCGACAACAAAATTTCCAATTGTAAATGGGACAGAATCTTTGTTTGGCAAGAGAATCCTCTCGCCATCC
197	GAAATGAAAATCTAAAGTACTAAGTAACTCATACCTCAATAGTGCTGTTA	CCACAAAGGGCCGAGTTAAG	AGAGAATCCTCTCGCCATCC	CCACAAAGGGCCGAGTTAAGGAAATGAAAATCTAAAGTACTAAGTAACTCATACCTCAATAGTGCTGTTAAGAGAATCCTCTCGCCATCC
198	TCAGTAATGAGGGAATACAAATTGTAATGCTCTTCAGTTCTATCCAATTG	CCACAAAGGGCCGAGTTAAG	AGAGAATCCTCTCGCCATCC	CCACAAAGGGCCGAGTTAAGTCAGTAATGAGGGAATACAAATTGTAATGCTCTTCAGTTCTATCCAATTGAGAGAATCCTCTCGCCATCC
199	TTAGTCTCGGAAAAGAAATGTGTCCAGGAAGCTGAAGAACACCATTCATA	CCACAAAGGGCCGAGTTAAG	AGAGAATCCTCTCGCCATCC	CCACAAAGGGCCGAGTTAAGTTAGTCTCGGAAAAGAAATGTGTCCAGGAAGCTGAAGAACACCATTCATAAGAGAATCCTCTCGCCATCC
200	ATATTATCAAGAAGATGGAGATATCTCTGGACTGGTATTCCTGTTCTGGA	CCACAAAGGGCCGAGTTAAG	AGAGAATCCTCTCGCCATCC	CCACAAAGGGCCGAGTTAAGATATTATCAAGAAGATGGAGATATCTCTGGACTGGTATTCCTGTTCTGGAAGAGAATCCTCTCGCCATCC
201	TTAGTTTGATCATGAAGTAGCATTTCAATTAGTCAGAAAATGTAGGTTTT	CCACAAAGGGCCGAGTTAAG	AGAGAATCCTCTCGCCATCC	CCACAAAGGGCCGAGTTAAGTTAGTTTGATCATGAAGTAGCATTTCAATTAGTCAGAAAATGTAGGTTTTAGAGAATCCTCTCGCCATCC
202	CAAGATTGGATGCGGCAAACAACTAAACATAGAAGCATGAATTACTGAAA	CCACAAAGGGCCGAGTTAAG	AGAGAATCCTCTCGCCATCC	CCACAAAGGGCCGAGTTAAGCAAGATTGGATGCGGCAAACAACTAAACATAGAAGCATGAATTACTGAAAAGAGAATCCTCTCGCCATCC
203	TCATTCTACAACATGAGAATTTGAATTTTCCTGTGCTGATAGTTAGCCAT	CCACAAAGGGCCGAGTTAAG	AGAGAATCCTCTCGCCATCC	CCACAAAGGGCCGAGTTAAGTCATTCTACAACATGAGAATTTGAATTTTCCTGTGCTGATAGTTAGCCATAGAGAATCCTCTCGCCATCC
204	AAAATGTAGGTCGCAAATTTTACACTCAACACCTTGGGAAAATTCAGCTT	CCACAAAGGGCCGAGTTAAG	AGAGAATCCTCTCGCCATCC	CCACAAAGGGCCGAGTTAAGAAAATGTAGGTCGCAAATTTTACACTCAACACCTTGGGAAAATTCAGCTTAGAGAATCCTCTCGCCATCC
205	ATAATTTTATTGTTTCTTCATGTTTGGCAATCCTGAGCTCTTTGAGGTGG	CCACAAAGGGCCGAGTTAAG	AGAGAATCCTCTCGCCATCC	CCACAAAGGGCCGAGTTAAGATAATTTTATTGTTTCTTCATGTTTGGCAATCCTGAGCTCTTTGAGGTGGAGAGAATCCTCTCGCCATCC
206	CTATTTTGTTCTTCATCTTTATTCATCAGAGTTGTCAGTGTAGGTTTTCT	CCACAAAGGGCCGAGTTAAG	AGAGAATCCTCTCGCCATCC	CCACAAAGGGCCGAGTTAAGCTATTTTGTTCTTCATCTTTATTCATCAGAGTTGTCAGTGTAGGTTTTCTAGAGAATCCTCTCGCCATCC
207	CTAGCTTGAAGAGGGTGGACTTCCTTAACTTCTCTGGGAATGACAGTGAA	CCACAAAGGGCCGAGTTAAG	AGAGAATCCTCTCGCCATCC	CCACAAAGGGCCGAGTTAAGCTAGCTTGAAGAGGGTGGACTTCCTTAACTTCTCTGGGAATGACAGTGAAAGAGAATCCTCTCGCCATCC
208	CAAATGGCTGTGAAATCAAGATCAATGCTGCAAAACTTTCATCCTTCAGG	CCACAAAGGGCCGAGTTAAG	AGAGAATCCTCTCGCCATCC	CCACAAAGGGCCGAGTTAAGCAAATGGCTGTGAAATCAAGATCAATGCTGCAAAACTTTCATCCTTCAGGAGAGAATCCTCTCGCCATCC
209	AATAGTAGCACTCTTCAGTTCTATCCAGTCACAATCTAATATATCTAATT	CCACAAAGGGCCGAGTTAAG	AGAGAATCCTCTCGCCATCC	CCACAAAGGGCCGAGTTAAGAATAGTAGCACTCTTCAGTTCTATCCAGTCACAATCTAATATATCTAATTAGAGAATCCTCTCGCCATCC
210	ATCAGAGATAGGATCAAAAGGAATGAAATAGCAAATAGGGCCAGTAACTA	CCACAAAGGGCCGAGTTAAG	AGAGAATCCTCTCGCCATCC	CCACAAAGGGCCGAGTTAAGATCAGAGATAGGATCAAAAGGAATGAAATAGCAAATAGGGCCAGTAACTAAGAGAATCCTCTCGCCATCC
211	CACCATAGCTTTCTAATTTGAGGTTAAATTTCGCTCATTTCTCCTTTCTT	CCACAAAGGGCCGAGTTAAG	AGAGAATCCTCTCGCCATCC	CCACAAAGGGCCGAGTTAAGCACCATAGCTTTCTAATTTGAGGTTAAATTTCGCTCATTTCTCCTTTCTTAGAGAATCCTCTCGCCATCC
212	TAGCCATCAAAGCAAGCGAGAAGGAAATCCAAACGGTACCATGCATAGTG	CCACAAAGGGCCGAGTTAAG	AGAGAATCCTCTCGCCATCC	CCACAAAGGGCCGAGTTAAGTAGCCATCAAAGCAAGCGAGAAGGAAATCCAAACGGTACCATGCATAGTGAGAGAATCCTCTCGCCATCC
213	TCTAGGTGTGCAAATTTTACCCCAGCTTAAGAAGATCCACCTATTGAAGT	CCACAAAGGGCCGAGTTAAG	AGAGAATCCTCTCGCCATCC	CCACAAAGGGCCGAGTTAAGTCTAGGTGTGCAAATTTTACCCCAGCTTAAGAAGATCCACCTATTGAAGTAGAGAATCCTCTCGCCATCC
214	AACTTCTTGATTTGGCTAGTTATTTATGTAAATTTTAAATGACATGTTTT	CCACAAAGGGCCGAGTTAAG	AGAGAATCCTCTCGCCATCC	CCACAAAGGGCCGAGTTAAGAACTTCTTGATTTGGCTAGTTATTTATGTAAATTTTAAATGACATGTTTTAGAGAATCCTCTCGCCATCC
215	TCCCTCCGAGAGTTGAATGTTTTCTTTGTGCATGGGTTCTAGTTTGAGGT	CCACAAAGGGCCGAGTTAAG	AGAGAATCCTCTCGCCATCC	CCACAAAGGGCCGAGTTAAGTCCCTCCGAGAGTTGAATGTTTTCTTTGTGCATGGGTTCTAGTTTGAGGTAGAGAATCCTCTCGCCATCC
216	TGAACTTTCTACTATACGTGTTTCTCGGTTGTTTTCTTATTGTCTATCAT	CCACAAAGGGCCGAGTTAAG	AGAGAATCCTCTCGCCATCC	CCACAAAGGGCCGAGTTAAGTGAACTTTCTACTATACGTGTTTCTCGGTTGTTTTCTTATTGTCTATCATAGAGAATCCTCTCGCCATCC
217	ATGTCTAATAACGAAACATTTCCAGTATTCAAAGCACAATTCCTATACCG	CCACAAAGGGCCGAGTTAAG	AGAGAATCCTCTCGCCATCC	CCACAAAGGGCCGAGTTAAGATGTCTAATAACGAAACATTTCCAGTATTCAAAGCACAATTCCTATACCGAGAGAATCCTCTCGCCATCC
218	TGTAATGATTCCACAACAACAACAAAGAGGACTGGTATACGACGGGAGAC	CCACAAAGGGCCGAGTTAAG	AGAGAATCCTCTCGCCATCC	CCACAAAGGGCCGAGTTAAGTGTAATGATTCCACAACAACAACAAAGAGGACTGGTATACGACGGGAGACAGAGAATCCTCTCGCCATCC
219	TCGACTAAGTTTGTCTAGTGATGTTCTTTGAGTTGAGTATGCTGCCCTTT	CCACAAAGGGCCGAGTTAAG	AGAGAATCCTCTCGCCATCC	CCACAAAGGGCCGAGTTAAGTCGACTAAGTTTGTCTAGTGATGTTCTTTGAGTTGAGTATGCTGCCCTTTAGAGAATCCTCTCGCCATCC
220	AATAAATAATTGGGAGTAGATATATACTTCTTGAAAATAAGGTTATATTT	CCACAAAGGGCCGAGTTAAG	AGAGAATCCTCTCGCCATCC	CCACAAAGGGCCGAGTTAAGAATAAATAATTGGGAGTAGATATATACTTCTTGAAAATAAGGTTATATTTAGAGAATCCTCTCGCCATCC
221	AACAAGGACAAATGAAGTAGTTACAGCAGTTAATACATTCTTCTTGACCA	CCACAAAGGGCCGAGTTAAG	AGAGAATCCTCTCGCCATCC	CCACAAAGGGCCGAGTTAAGAACAAGGACAAATGAAGTAGTTACAGCAGTTAATACATTCTTCTTGACCAAGAGAATCCTCTCGCCATCC
222	CAATCTACTTCTTTCTTTTGTAAGCTTTAAGTGAGGATGTTAATTTAACT	CCACAAAGGGCCGAGTTAAG	AGAGAATCCTCTCGCCATCC	CCACAAAGGGCCGAGTTAAGCAATCTACTTCTTTCTTTTGTAAGCTTTAAGTGAGGATGTTAATTTAACTAGAGAATCCTCTCGCCATCC
223	ATCCATTTTCCAGTTTGAAATATGCACTTATTTTACATTAAAGGCACAGA	CCACAAAGGGCCGAGTTAAG	AGAGAATCCTCTCGCCATCC	CCACAAAGGGCCGAGTTAAGATCCATTTTCCAGTTTGAAATATGCACTTATTTTACATTAAAGGCACAGAAGAGAATCCTCTCGCCATCC
224	CACTCGTACAACTAAACACAATCACATTAACATCTGTCTCTAATGAACTC	CCACAAAGGGCCGAGTTAAG	AGAGAATCCTCTCGCCATCC	CCACAAAGGGCCGAGTTAAGCACTCGTACAACTAAACACAATCACATTAACATCTGTCTCTAATGAACTCAGAGAATCCTCTCGCCATCC
225	TTTTGTGAAACCTGGTATGCTTTATTCTTTAGGATTTGTTTGTTTCTTAC	CCACAAAGGGCCGAGTTAAG	AGAGAATCCTCTCGCCATCC	CCACAAAGGGCCGAGTTAAGTTTTGTGAAACCTGGTATGCTTTATTCTTTAGGATTTGTTTGTTTCTTACAGAGAATCCTCTCGCCATCC
226	AAGCAACATGATTCTGAATAAAGAGGTTCCATAATTTAGTACATGTTTTG	CCACAAAGGGCCGAGTTAAG	AGAGAATCCTCTCGCCATCC	CCACAAAGGGCCGAGTTAAGAAGCAACATGATTCTGAATAAAGAGGTTCCATAATTTAGTACATGTTTTGAGAGAATCCTCTCGCCATCC
227	GAATGGCCAAGACAAATTGAAATAAGTAACTTCAGTAATCATCTCCCTAG	CCACAAAGGGCCGAGTTAAG	AGAGAATCCTCTCGCCATCC	CCACAAAGGGCCGAGTTAAGGAATGGCCAAGACAAATTGAAATAAGTAACTTCAGTAATCATCTCCCTAGAGAGAATCCTCTCGCCATCC
228	TCCTCTAATTGTATCTACAGACAGAATTAGCATTACAACTATGTTGGGCC	CCACAAAGGGCCGAGTTAAG	AGAGAATCCTCTCGCCATCC	CCACAAAGGGCCGAGTTAAGTCCTCTAATTGTATCTACAGACAGAATTAGCATTACAACTATGTTGGGCCAGAGAATCCTCTCGCCATCC
229	AGCCCCAATTTCACTAATTTACCTAACTAGTTTCAAAGTTCAGTTTATAC	CCACAAAGGGCCGAGTTAAG	AGAGAATCCTCTCGCCATCC	CCACAAAGGGCCGAGTTAAGAGCCCCAATTTCACTAATTTACCTAACTAGTTTCAAAGTTCAGTTTATACAGAGAATCCTCTCGCCATCC
230	TCATGTGTGCCGTACCTCTATCATCTTTTGGTTCTGTAGATTGGTGAAAT	CCACAAAGGGCCGAGTTAAG	AGAGAATCCTCTCGCCATCC	CCACAAAGGGCCGAGTTAAGTCATGTGTGCCGTACCTCTATCATCTTTTGGTTCTGTAGATTGGTGAAATAGAGAATCCTCTCGCCATCC
231	GGAATCTTCTTCCCACTAATAAAGCCACCACAGTTATAATAAGAATCCTG	CCACAAAGGGCCGAGTTAAG	AGAGAATCCTCTCGCCATCC	CCACAAAGGGCCGAGTTAAGGGAATCTTCTTCCCACTAATAAAGCCACCACAGTTATAATAAGAATCCTGAGAGAATCCTCTCGCCATCC
232	CCCTTTTCTATTGGCGGCATTAACAACACATAGAAGAATTATTAATGAGA	CCACAAAGGGCCGAGTTAAG	AGAGAATCCTCTCGCCATCC	CCACAAAGGGCCGAGTTAAGCCCTTTTCTATTGGCGGCATTAACAACACATAGAAGAATTATTAATGAGAAGAGAATCCTCTCGCCATCC
233	TATTTTATATAGGCATAAGGATTAAGAATTTGCTTAGTTAGTTAGTTAGT	CCACAAAGGGCCGAGTTAAG	AGAGAATCCTCTCGCCATCC	CCACAAAGGGCCGAGTTAAGTATTTTATATAGGCATAAGGATTAAGAATTTGCTTAGTTAGTTAGTTAGTAGAGAATCCTCTCGCCATCC
234	TCAATAAATTGTTCTTATCCATTAACAAAATTGAAAAGTTTATACATTTT	CCACAAAGGGCCGAGTTAAG	AGAGAATCCTCTCGCCATCC	CCACAAAGGGCCGAGTTAAGTCAATAAATTGTTCTTATCCATTAACAAAATTGAAAAGTTTATACATTTTAGAGAATCCTCTCGCCATCC
235	TGGGATGACAATATTGATTCATGGACGAAATGGATAAGAAAGGAAGACTG	CCACAAAGGGCCGAGTTAAG	AGAGAATCCTCTCGCCATCC	CCACAAAGGGCCGAGTTAAGTGGGATGACAATATTGATTCATGGACGAAATGGATAAGAAAGGAAGACTGAGAGAATCCTCTCGCCATCC
236	CAAGGTTAGTTTGGTCATTTTCTTCCCGTTCTTTGTAGCTACTTATATAA	CCACAAAGGGCCGAGTTAAG	AGAGAATCCTCTCGCCATCC	CCACAAAGGGCCGAGTTAAGCAAGGTTAGTTTGGTCATTTTCTTCCCGTTCTTTGTAGCTACTTATATAAAGAGAATCCTCTCGCCATCC
237	GAATTGAAGAAGAAAGGTCTATGCTTAGTTCCGGTCTCTATGTTGGCTAA	CCACAAAGGGCCGAGTTAAG	AGAGAATCCTCTCGCCATCC	CCACAAAGGGCCGAGTTAAGGAATTGAAGAAGAAAGGTCTATGCTTAGTTCCGGTCTCTATGTTGGCTAAAGAGAATCCTCTCGCCATCC
238	GCAGGCCAATTTATGCTGGAAATGCTCTTTGTACTGTCCGATATACTGGA	CCACAAAGGGCCGAGTTAAG	AGAGAATCCTCTCGCCATCC	CCACAAAGGGCCGAGTTAAGGCAGGCCAATTTATGCTGGAAATGCTCTTTGTACTGTCCGATATACTGGAAGAGAATCCTCTCGCCATCC
239	ATCTGAATCAGCCAAAAGAACCTACAGAAGAAATTACAGAATCAGACTTC	CCACAAAGGGCCGAGTTAAG	AGAGAATCCTCTCGCCATCC	CCACAAAGGGCCGAGTTAAGATCTGAATCAGCCAAAAGAACCTACAGAAGAAATTACAGAATCAGACTTCAGAGAATCCTCTCGCCATCC
240	AGAAGCTGCAAAGTCATTGGGTGAAGAAAATCCTATCTCTCTGCTACTTG	CCACAAAGGGCCGAGTTAAG	AGAGAATCCTCTCGCCATCC	CCACAAAGGGCCGAGTTAAGAGAAGCTGCAAAGTCATTGGGTGAAGAAAATCCTATCTCTCTGCTACTTGAGAGAATCCTCTCGCCATCC
241	AGAATGGAGAAGAAAAGAACTGATTTCTGTAATTAATTCGGCATTATATT	CCACAAAGGGCCGAGTTAAG	AGAGAATCCTCTCGCCATCC	CCACAAAGGGCCGAGTTAAGAGAATGGAGAAGAAAAGAACTGATTTCTGTAATTAATTCGGCATTATATTAGAGAATCCTCTCGCCATCC
242	ACTGGAAAAGTCGAGAAAGTATGTATTGCTTTGGGAATTTGATTATTCTG	CCACAAAGGGCCGAGTTAAG	AGAGAATCCTCTCGCCATCC	CCACAAAGGGCCGAGTTAAGACTGGAAAAGTCGAGAAAGTATGTATTGCTTTGGGAATTTGATTATTCTGAGAGAATCCTCTCGCCATCC
243	TTGATGCTCAACTCTATGTCATGACCGTGAGTGGCTAATTCCTCGAACGC	CCACAAAGGGCCGAGTTAAG	AGAGAATCCTCTCGCCATCC	CCACAAAGGGCCGAGTTAAGTTGATGCTCAACTCTATGTCATGACCGTGAGTGGCTAATTCCTCGAACGCAGAGAATCCTCTCGCCATCC
244	AACACATAAAATAAAGAATTTACATTTACATTCTGCTTGAAAGGTTTTCA	CCACAAAGGGCCGAGTTAAG	AGAGAATCCTCTCGCCATCC	CCACAAAGGGCCGAGTTAAGAACACATAAAATAAAGAATTTACATTTACATTCTGCTTGAAAGGTTTTCAAGAGAATCCTCTCGCCATCC
245	GCTATTGAGGTAAGGATTCTCTTTAATTTCATTAGTTTCGCCATTTCATG	CCACAAAGGGCCGAGTTAAG	AGAGAATCCTCTCGCCATCC	CCACAAAGGGCCGAGTTAAGGCTATTGAGGTAAGGATTCTCTTTAATTTCATTAGTTTCGCCATTTCATGAGAGAATCCTCTCGCCATCC
246	TTATACACAGATAACGTCCTTACCACAAAAGAACTTTATTGATAAATATT	CCACAAAGGGCCGAGTTAAG	AGAGAATCCTCTCGCCATCC	CCACAAAGGGCCGAGTTAAGTTATACACAGATAACGTCCTTACCACAAAAGAACTTTATTGATAAATATTAGAGAATCCTCTCGCCATCC
247	CAAGTGGATTGCAGAAGGAATACTTAAAGAACTGAATGCTAAAAGTGCAG	CCACAAAGGGCCGAGTTAAG	AGAGAATCCTCTCGCCATCC	CCACAAAGGGCCGAGTTAAGCAAGTGGATTGCAGAAGGAATACTTAAAGAACTGAATGCTAAAAGTGCAGAGAGAATCCTCTCGCCATCC
248	ATCTAACCTTCTGGACCAAGTATTTCAGGTTTCAGTGCGGATGGAAAGTG	CCACAAAGGGCCGAGTTAAG	AGAGAATCCTCTCGCCATCC	CCACAAAGGGCCGAGTTAAGATCTAACCTTCTGGACCAAGTATTTCAGGTTTCAGTGCGGATGGAAAGTGAGAGAATCCTCTCGCCATCC
249	AACAGGTGCACAAAAGGACTCTAGAGGTTTCATTGAGGAAATTCTTCACA	CCACAAAGGGCCGAGTTAAG	AGAGAATCCTCTCGCCATCC	CCACAAAGGGCCGAGTTAAGAACAGGTGCACAAAAGGACTCTAGAGGTTTCATTGAGGAAATTCTTCACAAGAGAATCCTCTCGCCATCC
250	GGAATGGGATCGTATATAAATAACCAAAGGAACTAGTTACAAAAGAGGCA	CCACAAAGGGCCGAGTTAAG	AGAGAATCCTCTCGCCATCC	CCACAAAGGGCCGAGTTAAGGGAATGGGATCGTATATAAATAACCAAAGGAACTAGTTACAAAAGAGGCAAGAGAATCCTCTCGCCATCC
251	AATCAATTAACCTTCTCGAGCGAAAATAATTGTAACATTGAAGATAAAGA	CCACAAAGGGCCGAGTTAAG	AGAGAATCCTCTCGCCATCC	CCACAAAGGGCCGAGTTAAGAATCAATTAACCTTCTCGAGCGAAAATAATTGTAACATTGAAGATAAAGAAGAGAATCCTCTCGCCATCC
252	CAATGTTTTCATACTTTTAAATGATCCACCCATTGAAAATCGAGCTTTGG	CCACAAAGGGCCGAGTTAAG	AGAGAATCCTCTCGCCATCC	CCACAAAGGGCCGAGTTAAGCAATGTTTTCATACTTTTAAATGATCCACCCATTGAAAATCGAGCTTTGGAGAGAATCCTCTCGCCATCC
253	TGTTGGTTTATATGATTTGCCTTTGAATCTGAAGTATGAAGGTTGGCATT	CCACAAAGGGCCGAGTTAAG	AGAGAATCCTCTCGCCATCC	CCACAAAGGGCCGAGTTAAGTGTTGGTTTATATGATTTGCCTTTGAATCTGAAGTATGAAGGTTGGCATTAGAGAATCCTCTCGCCATCC
254	GACAGATGAATGGAGATAATGATGGTAGATTAAGCTCCTTCAAGAGAAAT	CCACAAAGGGCCGAGTTAAG	AGAGAATCCTCTCGCCATCC	CCACAAAGGGCCGAGTTAAGGACAGATGAATGGAGATAATGATGGTAGATTAAGCTCCTTCAAGAGAAATAGAGAATCCTCTCGCCATCC
255	TCTAGACAATAGGTTAATTGATCTTCAAATGGTTCTTCTATCAGCATGGA	CCACAAAGGGCCGAGTTAAG	AGAGAATCCTCTCGCCATCC	CCACAAAGGGCCGAGTTAAGTCTAGACAATAGGTTAATTGATCTTCAAATGGTTCTTCTATCAGCATGGAAGAGAATCCTCTCGCCATCC
256	AGACCCTGATCTGATTCGTTATGTGTATGAAAGGGAGGGACAAGAAGAAG	CCACAAAGGGCCGAGTTAAG	AGAGAATCCTCTCGCCATCC	CCACAAAGGGCCGAGTTAAGAGACCCTGATCTGATTCGTTATGTGTATGAAAGGGAGGGACAAGAAGAAGAGAGAATCCTCTCGCCATCC
257	AGTACCTTCTACACAATTCATTTTCTAGAGTGCAGTCCACCTTTCCCAAA	CCACAAAGGGCCGAGTTAAG	AGAGAATCCTCTCGCCATCC	CCACAAAGGGCCGAGTTAAGAGTACCTTCTACACAATTCATTTTCTAGAGTGCAGTCCACCTTTCCCAAAAGAGAATCCTCTCGCCATCC
258	ACTGTTAAGTTTTGAATGACCATATCCCCAACTTTCTTCATTTGAAACCA	CCACAAAGGGCCGAGTTAAG	AGAGAATCCTCTCGCCATCC	CCACAAAGGGCCGAGTTAAGACTGTTAAGTTTTGAATGACCATATCCCCAACTTTCTTCATTTGAAACCAAGAGAATCCTCTCGCCATCC
259	AGCAGTTTAGTTCATAGTATCCACATTCCAGTTGCGAAATTTCATTTTGA	CCACAAAGGGCCGAGTTAAG	AGAGAATCCTCTCGCCATCC	CCACAAAGGGCCGAGTTAAGAGCAGTTTAGTTCATAGTATCCACATTCCAGTTGCGAAATTTCATTTTGAAGAGAATCCTCTCGCCATCC
260	AATCCAAGAACTTAGATAGGTAGATGCTTATGTTGAATTTATAAGTCATT	CCACAAAGGGCCGAGTTAAG	AGAGAATCCTCTCGCCATCC	CCACAAAGGGCCGAGTTAAGAATCCAAGAACTTAGATAGGTAGATGCTTATGTTGAATTTATAAGTCATTAGAGAATCCTCTCGCCATCC
261	TTCAAATAATAATAATGGAACTGCTGCACCGCCTCCTTCTAACGACACCA	CCACAAAGGGCCGAGTTAAG	AGAGAATCCTCTCGCCATCC	CCACAAAGGGCCGAGTTAAGTTCAAATAATAATAATGGAACTGCTGCACCGCCTCCTTCTAACGACACCAAGAGAATCCTCTCGCCATCC
262	ATATAACTCTAGCTACTGATCCCTACATAGATTTGGTTGAACTCTCTTTG	CCACAAAGGGCCGAGTTAAG	AGAGAATCCTCTCGCCATCC	CCACAAAGGGCCGAGTTAAGATATAACTCTAGCTACTGATCCCTACATAGATTTGGTTGAACTCTCTTTGAGAGAATCCTCTCGCCATCC
263	TTTCAATGAGGAGCCAAGAAGACAACTAGTTAAGTGACCCAAAAGGGAAA	CCACAAAGGGCCGAGTTAAG	AGAGAATCCTCTCGCCATCC	CCACAAAGGGCCGAGTTAAGTTTCAATGAGGAGCCAAGAAGACAACTAGTTAAGTGACCCAAAAGGGAAAAGAGAATCCTCTCGCCATCC
264	AAAGGTATGAGTTCCATAATGATCGAGCGGCTTACTTTATTGGGCTTTCG	CCACAAAGGGCCGAGTTAAG	AGAGAATCCTCTCGCCATCC	CCACAAAGGGCCGAGTTAAGAAAGGTATGAGTTCCATAATGATCGAGCGGCTTACTTTATTGGGCTTTCGAGAGAATCCTCTCGCCATCC
265	CTTTGTACATAAGATAAAGAATCATTTTAAACGCAATATAATAATAATAT	CCACAAAGGGCCGAGTTAAG	AGAGAATCCTCTCGCCATCC	CCACAAAGGGCCGAGTTAAGCTTTGTACATAAGATAAAGAATCATTTTAAACGCAATATAATAATAATATAGAGAATCCTCTCGCCATCC
266	ATTTTGGTTACAATCATGATTAGATGTTCCACATTCCCTGGCATAAAAGG	CCACAAAGGGCCGAGTTAAG	AGAGAATCCTCTCGCCATCC	CCACAAAGGGCCGAGTTAAGATTTTGGTTACAATCATGATTAGATGTTCCACATTCCCTGGCATAAAAGGAGAGAATCCTCTCGCCATCC
267	ACGTGACTTATTTTACAAAGTATTATATATTTATTAGCCCATCATTGTTA	CCACAAAGGGCCGAGTTAAG	AGAGAATCCTCTCGCCATCC	CCACAAAGGGCCGAGTTAAGACGTGACTTATTTTACAAAGTATTATATATTTATTAGCCCATCATTGTTAAGAGAATCCTCTCGCCATCC
268	AGTTAGAGAATATAGATTAAGAGATTAAAGTGTACTTAACTCAATATAAT	CCACAAAGGGCCGAGTTAAG	AGAGAATCCTCTCGCCATCC	CCACAAAGGGCCGAGTTAAGAGTTAGAGAATATAGATTAAGAGATTAAAGTGTACTTAACTCAATATAATAGAGAATCCTCTCGCCATCC
269	AAAATTTGCATTCGTTTTAAGTAATGTGATTTCTTATAAAAGTCAAAGTT	CCACAAAGGGCCGAGTTAAG	AGAGAATCCTCTCGCCATCC	CCACAAAGGGCCGAGTTAAGAAAATTTGCATTCGTTTTAAGTAATGTGATTTCTTATAAAAGTCAAAGTTAGAGAATCCTCTCGCCATCC
270	TTTTCACCCGAATTGAATTGAGGAATAATGTCCAAATAATATAATAGTCA	CCACAAAGGGCCGAGTTAAG	AGAGAATCCTCTCGCCATCC	CCACAAAGGGCCGAGTTAAGTTTTCACCCGAATTGAATTGAGGAATAATGTCCAAATAATATAATAGTCAAGAGAATCCTCTCGCCATCC
271	GAAAATCATTAGGTGGTGGCTGTGGCGGGAATGGTGGTGGTAGGCGGTGG	CCACAAAGGGCCGAGTTAAG	AGAGAATCCTCTCGCCATCC	CCACAAAGGGCCGAGTTAAGGAAAATCATTAGGTGGTGGCTGTGGCGGGAATGGTGGTGGTAGGCGGTGGAGAGAATCCTCTCGCCATCC
272	CTTTCCTTGTTTGAGTTTCTGTGAAGGTAAATGGAGTGGACTATTGATTA	CCACAAAGGGCCGAGTTAAG	AGAGAATCCTCTCGCCATCC	CCACAAAGGGCCGAGTTAAGCTTTCCTTGTTTGAGTTTCTGTGAAGGTAAATGGAGTGGACTATTGATTAAGAGAATCCTCTCGCCATCC
273	GAGCATCTACAATTAGAAGATTCAAGACAAGATGGTAAGTTGCATGAGTT	CCACAAAGGGCCGAGTTAAG	AGAGAATCCTCTCGCCATCC	CCACAAAGGGCCGAGTTAAGGAGCATCTACAATTAGAAGATTCAAGACAAGATGGTAAGTTGCATGAGTTAGAGAATCCTCTCGCCATCC
274	GTTTGTTGCTTACACAGTCTATATTCCATAATTTTGTTCATTCACTTATA	CCACAAAGGGCCGAGTTAAG	AGAGAATCCTCTCGCCATCC	CCACAAAGGGCCGAGTTAAGGTTTGTTGCTTACACAGTCTATATTCCATAATTTTGTTCATTCACTTATAAGAGAATCCTCTCGCCATCC
275	CTGCTGATAGATTTTATTCTTGCCACAAAAGATAGTTCTCCAAAATAGTA	CCACAAAGGGCCGAGTTAAG	AGAGAATCCTCTCGCCATCC	CCACAAAGGGCCGAGTTAAGCTGCTGATAGATTTTATTCTTGCCACAAAAGATAGTTCTCCAAAATAGTAAGAGAATCCTCTCGCCATCC
276	AACAAACGTGACAACAAGTAAACATAAGAGAATCAAAAGGTTAAAGCTTT	CCACAAAGGGCCGAGTTAAG	AGAGAATCCTCTCGCCATCC	CCACAAAGGGCCGAGTTAAGAACAAACGTGACAACAAGTAAACATAAGAGAATCAAAAGGTTAAAGCTTTAGAGAATCCTCTCGCCATCC
277	CATTTCCAGTCTTCTTTGATTAGTACTGATGTTAATTCTATTGGTTCCTT	CCACAAAGGGCCGAGTTAAG	AGAGAATCCTCTCGCCATCC	CCACAAAGGGCCGAGTTAAGCATTTCCAGTCTTCTTTGATTAGTACTGATGTTAATTCTATTGGTTCCTTAGAGAATCCTCTCGCCATCC
278	CTACCATGTTATTTACCTAATACAGTTTCCATTTTACCCTTGCATATTAT	CCACAAAGGGCCGAGTTAAG	AGAGAATCCTCTCGCCATCC	CCACAAAGGGCCGAGTTAAGCTACCATGTTATTTACCTAATACAGTTTCCATTTTACCCTTGCATATTATAGAGAATCCTCTCGCCATCC
279	TTTTCTAAGGTTGATCTTTGAGGATTTATCTCTTGAATCTTCTACATAAA	CCACAAAGGGCCGAGTTAAG	AGAGAATCCTCTCGCCATCC	CCACAAAGGGCCGAGTTAAGTTTTCTAAGGTTGATCTTTGAGGATTTATCTCTTGAATCTTCTACATAAAAGAGAATCCTCTCGCCATCC
280	CCCTGCAACATCACTAAGCCTAAACCAAAGCAAGCTAAATGTTGTGTTTC	CCACAAAGGGCCGAGTTAAG	AGAGAATCCTCTCGCCATCC	CCACAAAGGGCCGAGTTAAGCCCTGCAACATCACTAAGCCTAAACCAAAGCAAGCTAAATGTTGTGTTTCAGAGAATCCTCTCGCCATCC
281	CAATGGAACCTGACTTGGGAGTGGATGAGGAATGAATTCATATACAACAT	CCACAAAGGGCCGAGTTAAG	AGAGAATCCTCTCGCCATCC	CCACAAAGGGCCGAGTTAAGCAATGGAACCTGACTTGGGAGTGGATGAGGAATGAATTCATATACAACATAGAGAATCCTCTCGCCATCC
282	AGCAGAGACCAATAGCTCGTTGTATTGAAAATGAACGCTAGCCATCCATG	CCACAAAGGGCCGAGTTAAG	AGAGAATCCTCTCGCCATCC	CCACAAAGGGCCGAGTTAAGAGCAGAGACCAATAGCTCGTTGTATTGAAAATGAACGCTAGCCATCCATGAGAGAATCCTCTCGCCATCC
283	AAAAGATATATCCACATCTTAAGAACGCATCAGCACAACCCTGGTCCTTT	CCACAAAGGGCCGAGTTAAG	AGAGAATCCTCTCGCCATCC	CCACAAAGGGCCGAGTTAAGAAAAGATATATCCACATCTTAAGAACGCATCAGCACAACCCTGGTCCTTTAGAGAATCCTCTCGCCATCC
284	TGACAATTTGAGGGATTTTAGCAAAGGCCCAAGAGAAACAATACACCTAG	CCACAAAGGGCCGAGTTAAG	AGAGAATCCTCTCGCCATCC	CCACAAAGGGCCGAGTTAAGTGACAATTTGAGGGATTTTAGCAAAGGCCCAAGAGAAACAATACACCTAGAGAGAATCCTCTCGCCATCC
285	CAAGGTCGTAATCATCCTCAAAATATCTACAACTATGATCTGGTTTCAAC	CCACAAAGGGCCGAGTTAAG	AGAGAATCCTCTCGCCATCC	CCACAAAGGGCCGAGTTAAGCAAGGTCGTAATCATCCTCAAAATATCTACAACTATGATCTGGTTTCAACAGAGAATCCTCTCGCCATCC
286	TATTTCTTCAACGCTGCTAATCTCTTCAACAAACTGGGATTTCGGTTCCA	CCACAAAGGGCCGAGTTAAG	AGAGAATCCTCTCGCCATCC	CCACAAAGGGCCGAGTTAAGTATTTCTTCAACGCTGCTAATCTCTTCAACAAACTGGGATTTCGGTTCCAAGAGAATCCTCTCGCCATCC
287	ATTTACTCCCCATTACATCCATTACTCTAGATTTCAATAATAACTGACAG	CCACAAAGGGCCGAGTTAAG	AGAGAATCCTCTCGCCATCC	CCACAAAGGGCCGAGTTAAGATTTACTCCCCATTACATCCATTACTCTAGATTTCAATAATAACTGACAGAGAGAATCCTCTCGCCATCC
288	GGAGGATCTTAGCATCTAGAAAAGAGTGATCAATAGGTAGAAAATGCTAT	CCACAAAGGGCCGAGTTAAG	AGAGAATCCTCTCGCCATCC	CCACAAAGGGCCGAGTTAAGGGAGGATCTTAGCATCTAGAAAAGAGTGATCAATAGGTAGAAAATGCTATAGAGAATCCTCTCGCCATCC
289	CAAGTTTCAGAAGAAGTGATTTATATAGAAGTAGTTTGTCAAATTCATCT	CCACAAAGGGCCGAGTTAAG	AGAGAATCCTCTCGCCATCC	CCACAAAGGGCCGAGTTAAGCAAGTTTCAGAAGAAGTGATTTATATAGAAGTAGTTTGTCAAATTCATCTAGAGAATCCTCTCGCCATCC
290	CAGAGAAGCCTTTTAACTCTTAGAAAGCCTAACACTACAAATAGAAGGGC	CCACAAAGGGCCGAGTTAAG	AGAGAATCCTCTCGCCATCC	CCACAAAGGGCCGAGTTAAGCAGAGAAGCCTTTTAACTCTTAGAAAGCCTAACACTACAAATAGAAGGGCAGAGAATCCTCTCGCCATCC
291	ACAAAGTCATAGACCTAAAGAGATGCATAACGACTGACCTAAAACTATAG	CCACAAAGGGCCGAGTTAAG	AGAGAATCCTCTCGCCATCC	CCACAAAGGGCCGAGTTAAGACAAAGTCATAGACCTAAAGAGATGCATAACGACTGACCTAAAACTATAGAGAGAATCCTCTCGCCATCC
292	ATGCGACGAGATCCTGTGGCCCTTACTACTGTTTCTCTCTGCCTAGCCTG	CCACAAAGGGCCGAGTTAAG	AGAGAATCCTCTCGCCATCC	CCACAAAGGGCCGAGTTAAGATGCGACGAGATCCTGTGGCCCTTACTACTGTTTCTCTCTGCCTAGCCTGAGAGAATCCTCTCGCCATCC
293	TATATATATTCAGTAATGTACATAAATAAGAAAGAGGAAAAGTGCCAAAG	CCACAAAGGGCCGAGTTAAG	AGAGAATCCTCTCGCCATCC	CCACAAAGGGCCGAGTTAAGTATATATATTCAGTAATGTACATAAATAAGAAAGAGGAAAAGTGCCAAAGAGAGAATCCTCTCGCCATCC
294	TGCAAGCTCCAGGTCCATGATTGAAATACTCACCAAAATAGCATGTCTTC	CCACAAAGGGCCGAGTTAAG	AGAGAATCCTCTCGCCATCC	CCACAAAGGGCCGAGTTAAGTGCAAGCTCCAGGTCCATGATTGAAATACTCACCAAAATAGCATGTCTTCAGAGAATCCTCTCGCCATCC
295	CATCTTCGGCAACGCAGCAGTGGTTCTACAAAATTGCAAAATAGTAGCCA	CCACAAAGGGCCGAGTTAAG	AGAGAATCCTCTCGCCATCC	CCACAAAGGGCCGAGTTAAGCATCTTCGGCAACGCAGCAGTGGTTCTACAAAATTGCAAAATAGTAGCCAAGAGAATCCTCTCGCCATCC
296	ATAAGTTCCAAGCAGTCTTCAATCGGACCTAGCTCATTATAGCCATTGAT	CCACAAAGGGCCGAGTTAAG	AGAGAATCCTCTCGCCATCC	CCACAAAGGGCCGAGTTAAGATAAGTTCCAAGCAGTCTTCAATCGGACCTAGCTCATTATAGCCATTGATAGAGAATCCTCTCGCCATCC
297	AGCTCTAATCAATCATTATTATTTCCTTAAACCAATTTGTCTGTAGGAAA	CCACAAAGGGCCGAGTTAAG	AGAGAATCCTCTCGCCATCC	CCACAAAGGGCCGAGTTAAGAGCTCTAATCAATCATTATTATTTCCTTAAACCAATTTGTCTGTAGGAAAAGAGAATCCTCTCGCCATCC
298	AACAGTTTATAACGTGGTTAAGTGATAAGAGAATCCAACATTATGCCCAC	CCACAAAGGGCCGAGTTAAG	AGAGAATCCTCTCGCCATCC	CCACAAAGGGCCGAGTTAAGAACAGTTTATAACGTGGTTAAGTGATAAGAGAATCCAACATTATGCCCACAGAGAATCCTCTCGCCATCC
299	ACATCATCATACAAGTAATCAACTAATCATAGCAATTTAAACGTCCAAAA	CCACAAAGGGCCGAGTTAAG	AGAGAATCCTCTCGCCATCC	CCACAAAGGGCCGAGTTAAGACATCATCATACAAGTAATCAACTAATCATAGCAATTTAAACGTCCAAAAAGAGAATCCTCTCGCCATCC
300	ACACAAACTATTATTACCACTCAAACTAATATTATTCGCACAAATAGTAG	CCACAAAGGGCCGAGTTAAG	AGAGAATCCTCTCGCCATCC	CCACAAAGGGCCGAGTTAAGACACAAACTATTATTACCACTCAAACTAATATTATTCGCACAAATAGTAGAGAGAATCCTCTCGCCATCC
301	GATATATAATAAATAATAGGGTCCGTCTCATTTCTCCTTTCTTCCTTGCG	CCACAAAGGGCCGAGTTAAG	AGAGAATCCTCTCGCCATCC	CCACAAAGGGCCGAGTTAAGGATATATAATAAATAATAGGGTCCGTCTCATTTCTCCTTTCTTCCTTGCGAGAGAATCCTCTCGCCATCC
302	TTAATAATGCAAAGAACCTCAAGCCTCAAGGACAGTGAAGTTTCTTGGAT	CCACAAAGGGCCGAGTTAAG	AGAGAATCCTCTCGCCATCC	CCACAAAGGGCCGAGTTAAGTTAATAATGCAAAGAACCTCAAGCCTCAAGGACAGTGAAGTTTCTTGGATAGAGAATCCTCTCGCCATCC
303	AGCAGCTAAGAACACAAGAGGGTCAATGGTGTACAAACGAAGAGGAACTG	CCACAAAGGGCCGAGTTAAG	AGAGAATCCTCTCGCCATCC	CCACAAAGGGCCGAGTTAAGAGCAGCTAAGAACACAAGAGGGTCAATGGTGTACAAACGAAGAGGAACTGAGAGAATCCTCTCGCCATCC
304	TATTTTAATGATGATATTACTAAGACAAATAAGCCTAAACTGTGAGATAA	CCACAAAGGGCCGAGTTAAG	AGAGAATCCTCTCGCCATCC	CCACAAAGGGCCGAGTTAAGTATTTTAATGATGATATTACTAAGACAAATAAGCCTAAACTGTGAGATAAAGAGAATCCTCTCGCCATCC
305	GTTCATCTTCTGTCTCCATGGGATAAAGCTAGCTTGCCAATCTCCAACAA	CCACAAAGGGCCGAGTTAAG	AGAGAATCCTCTCGCCATCC	CCACAAAGGGCCGAGTTAAGGTTCATCTTCTGTCTCCATGGGATAAAGCTAGCTTGCCAATCTCCAACAAAGAGAATCCTCTCGCCATCC
306	GTCTAGTAACCTTGAATTTGGGACTGAAGATAGAGAGACCTAAATCGGGG	CCACAAAGGGCCGAGTTAAG	AGAGAATCCTCTCGCCATCC	CCACAAAGGGCCGAGTTAAGGTCTAGTAACCTTGAATTTGGGACTGAAGATAGAGAGACCTAAATCGGGGAGAGAATCCTCTCGCCATCC
307	GGCGTTTTCCATTGGTTCTCCTCATTGATCACACTCAGTTGACTCAATGA	CCACAAAGGGCCGAGTTAAG	AGAGAATCCTCTCGCCATCC	CCACAAAGGGCCGAGTTAAGGGCGTTTTCCATTGGTTCTCCTCATTGATCACACTCAGTTGACTCAATGAAGAGAATCCTCTCGCCATCC
308	CGGGTTATAGTACATCTTTTCTTTAGAACCTTTCGCCTCTTTCTTTTCTT	CCACAAAGGGCCGAGTTAAG	AGAGAATCCTCTCGCCATCC	CCACAAAGGGCCGAGTTAAGCGGGTTATAGTACATCTTTTCTTTAGAACCTTTCGCCTCTTTCTTTTCTTAGAGAATCCTCTCGCCATCC
309	AATCACATTTGGGAATTATTGAGATTCAGAATTGTTTCTCCATTTTCAAA	CCACAAAGGGCCGAGTTAAG	AGAGAATCCTCTCGCCATCC	CCACAAAGGGCCGAGTTAAGAATCACATTTGGGAATTATTGAGATTCAGAATTGTTTCTCCATTTTCAAAAGAGAATCCTCTCGCCATCC
310	CTCTCTCTCAAAAGCCAAAAGTTTTAGTTTAATGGAGTGTTGTAAGAACA	CCACAAAGGGCCGAGTTAAG	AGAGAATCCTCTCGCCATCC	CCACAAAGGGCCGAGTTAAGCTCTCTCTCAAAAGCCAAAAGTTTTAGTTTAATGGAGTGTTGTAAGAACAAGAGAATCCTCTCGCCATCC
311	TTTTAAACCAAACAACTAAGCTATAACCTCCTTTAATATAATAAGCAAAC	CCACAAAGGGCCGAGTTAAG	AGAGAATCCTCTCGCCATCC	CCACAAAGGGCCGAGTTAAGTTTTAAACCAAACAACTAAGCTATAACCTCCTTTAATATAATAAGCAAACAGAGAATCCTCTCGCCATCC
312	TTGAAATGACTAAAACGATCACCTGAATATAATATGGGGATCAAAAGAAA	CCACAAAGGGCCGAGTTAAG	AGAGAATCCTCTCGCCATCC	CCACAAAGGGCCGAGTTAAGTTGAAATGACTAAAACGATCACCTGAATATAATATGGGGATCAAAAGAAAAGAGAATCCTCTCGCCATCC
313	TATTCTACTTATTTGATTGATGAATGCCTGATTACTAATATGTCTATTTT	CCACAAAGGGCCGAGTTAAG	AGAGAATCCTCTCGCCATCC	CCACAAAGGGCCGAGTTAAGTATTCTACTTATTTGATTGATGAATGCCTGATTACTAATATGTCTATTTTAGAGAATCCTCTCGCCATCC
314	GATGTAAACCATGTTAGCTATTTGGCCATTACTATGTAAATGACAAGAAT	CCACAAAGGGCCGAGTTAAG	AGAGAATCCTCTCGCCATCC	CCACAAAGGGCCGAGTTAAGGATGTAAACCATGTTAGCTATTTGGCCATTACTATGTAAATGACAAGAATAGAGAATCCTCTCGCCATCC
315	ATCAAACTAGAAGTATTTCACAAATGAAACGAACCTGTCATTATCATACT	CCACAAAGGGCCGAGTTAAG	AGAGAATCCTCTCGCCATCC	CCACAAAGGGCCGAGTTAAGATCAAACTAGAAGTATTTCACAAATGAAACGAACCTGTCATTATCATACTAGAGAATCCTCTCGCCATCC
316	TTAGATGACCTAAATGCTTGAAAGTGTAAAAGTTGATGAAGTAGGGGAAT	CCACAAAGGGCCGAGTTAAG	AGAGAATCCTCTCGCCATCC	CCACAAAGGGCCGAGTTAAGTTAGATGACCTAAATGCTTGAAAGTGTAAAAGTTGATGAAGTAGGGGAATAGAGAATCCTCTCGCCATCC
317	ATTTCAAGGAAACAGCTGAAGTCATTGCAAAGGTCTCTTTCTCTTGTTTT	CCACAAAGGGCCGAGTTAAG	AGAGAATCCTCTCGCCATCC	CCACAAAGGGCCGAGTTAAGATTTCAAGGAAACAGCTGAAGTCATTGCAAAGGTCTCTTTCTCTTGTTTTAGAGAATCCTCTCGCCATCC
318	TATGGGAAGATTATTATAATTAGTGTTGTTGGGACTGTAATAGAAAGTGA	CCACAAAGGGCCGAGTTAAG	AGAGAATCCTCTCGCCATCC	CCACAAAGGGCCGAGTTAAGTATGGGAAGATTATTATAATTAGTGTTGTTGGGACTGTAATAGAAAGTGAAGAGAATCCTCTCGCCATCC
319	AGATTTTATGACCCTCTTAATGGACAAGTTCTTATTGATGAAAGGGATAT	CCACAAAGGGCCGAGTTAAG	AGAGAATCCTCTCGCCATCC	CCACAAAGGGCCGAGTTAAGAGATTTTATGACCCTCTTAATGGACAAGTTCTTATTGATGAAAGGGATATAGAGAATCCTCTCGCCATCC
320	TGCATTGGATCTTCATCATCACTGTCATAATCAAATTGCACTGAGTAAGG	CCACAAAGGGCCGAGTTAAG	AGAGAATCCTCTCGCCATCC	CCACAAAGGGCCGAGTTAAGTGCATTGGATCTTCATCATCACTGTCATAATCAAATTGCACTGAGTAAGGAGAGAATCCTCTCGCCATCC
321	TAACTTCTAGACATCTCTACCGCAAATTTTAAATCTAAATTATCTAAATC	CCACAAAGGGCCGAGTTAAG	AGAGAATCCTCTCGCCATCC	CCACAAAGGGCCGAGTTAAGTAACTTCTAGACATCTCTACCGCAAATTTTAAATCTAAATTATCTAAATCAGAGAATCCTCTCGCCATCC
322	TTTGCTACATCAATAAAAGAGAACATTTTGTTTGGAAAAGAAGGAGCTTC	CCACAAAGGGCCGAGTTAAG	AGAGAATCCTCTCGCCATCC	CCACAAAGGGCCGAGTTAAGTTTGCTACATCAATAAAAGAGAACATTTTGTTTGGAAAAGAAGGAGCTTCAGAGAATCCTCTCGCCATCC
323	CCTACAGTTTTGCCTGCTGGAAAACGAAGATTTAGGCCTTGTAGAATTGG	CCACAAAGGGCCGAGTTAAG	AGAGAATCCTCTCGCCATCC	CCACAAAGGGCCGAGTTAAGCCTACAGTTTTGCCTGCTGGAAAACGAAGATTTAGGCCTTGTAGAATTGGAGAGAATCCTCTCGCCATCC
324	GGAGAAATTGAATTCAATGGTGTCTATTTCAACTACCCATCAAGACCTGA	CCACAAAGGGCCGAGTTAAG	AGAGAATCCTCTCGCCATCC	CCACAAAGGGCCGAGTTAAGGGAGAAATTGAATTCAATGGTGTCTATTTCAACTACCCATCAAGACCTGAAGAGAATCCTCTCGCCATCC
325	AAAAGCCCAGCTAAAGTAGATAATTCCCATGGAACCCATCATCAATCCTC	CCACAAAGGGCCGAGTTAAG	AGAGAATCCTCTCGCCATCC	CCACAAAGGGCCGAGTTAAGAAAAGCCCAGCTAAAGTAGATAATTCCCATGGAACCCATCATCAATCCTCAGAGAATCCTCTCGCCATCC
326	ATATCTATAAATTCGAAGGAACATTATATTGCCGGCCGTTTTAACGTTTG	CCACAAAGGGCCGAGTTAAG	AGAGAATCCTCTCGCCATCC	CCACAAAGGGCCGAGTTAAGATATCTATAAATTCGAAGGAACATTATATTGCCGGCCGTTTTAACGTTTGAGAGAATCCTCTCGCCATCC
327	AAACTTGTGTAATTGTATGTTATTCACCTCCTTATATAAGATAGTTTAGT	CCACAAAGGGCCGAGTTAAG	AGAGAATCCTCTCGCCATCC	CCACAAAGGGCCGAGTTAAGAAACTTGTGTAATTGTATGTTATTCACCTCCTTATATAAGATAGTTTAGTAGAGAATCCTCTCGCCATCC
328	GTCATTTACTTATAATAGCACAAAACAGCAATTTAAAACTAATTAAAGGA	CCACAAAGGGCCGAGTTAAG	AGAGAATCCTCTCGCCATCC	CCACAAAGGGCCGAGTTAAGGTCATTTACTTATAATAGCACAAAACAGCAATTTAAAACTAATTAAAGGAAGAGAATCCTCTCGCCATCC
329	TCGTGTTTAATTATTTCGTTTAGATGCGTTTGAAGTATTTGAGCGTACCA	CCACAAAGGGCCGAGTTAAG	AGAGAATCCTCTCGCCATCC	CCACAAAGGGCCGAGTTAAGTCGTGTTTAATTATTTCGTTTAGATGCGTTTGAAGTATTTGAGCGTACCAAGAGAATCCTCTCGCCATCC
330	TTTAATAACGAAGATATCTCCCCAAATAGCCGCTTTGAAGATTCCTCTGC	CCACAAAGGGCCGAGTTAAG	AGAGAATCCTCTCGCCATCC	CCACAAAGGGCCGAGTTAAGTTTAATAACGAAGATATCTCCCCAAATAGCCGCTTTGAAGATTCCTCTGCAGAGAATCCTCTCGCCATCC
331	AACCAAAACTAAAATATAAGATATGTAAAATTACTCAACCAATTACTTAA	CCACAAAGGGCCGAGTTAAG	AGAGAATCCTCTCGCCATCC	CCACAAAGGGCCGAGTTAAGAACCAAAACTAAAATATAAGATATGTAAAATTACTCAACCAATTACTTAAAGAGAATCCTCTCGCCATCC
332	GATTTATTCAACTACGTATTAACAGCTTAAACTTTTCCTTCCTTCCATGC	CCACAAAGGGCCGAGTTAAG	AGAGAATCCTCTCGCCATCC	CCACAAAGGGCCGAGTTAAGGATTTATTCAACTACGTATTAACAGCTTAAACTTTTCCTTCCTTCCATGCAGAGAATCCTCTCGCCATCC
333	TAGAAAGAAAATCTTTGATAGGAATTTTCATCTTTGATAAGTTCACAAAA	CCACAAAGGGCCGAGTTAAG	AGAGAATCCTCTCGCCATCC	CCACAAAGGGCCGAGTTAAGTAGAAAGAAAATCTTTGATAGGAATTTTCATCTTTGATAAGTTCACAAAAAGAGAATCCTCTCGCCATCC
334	TGAACTAAACAAAAGGAAATGTATTGCCTATCTCAAACGAATTACAAACC	CCACAAAGGGCCGAGTTAAG	AGAGAATCCTCTCGCCATCC	CCACAAAGGGCCGAGTTAAGTGAACTAAACAAAAGGAAATGTATTGCCTATCTCAAACGAATTACAAACCAGAGAATCCTCTCGCCATCC
335	GTTTCAACTTATTAGCTGTAATTTCCTAGAAGATGACTATGATATGTTAA	CCACAAAGGGCCGAGTTAAG	AGAGAATCCTCTCGCCATCC	CCACAAAGGGCCGAGTTAAGGTTTCAACTTATTAGCTGTAATTTCCTAGAAGATGACTATGATATGTTAAAGAGAATCCTCTCGCCATCC
336	CTGGATCTAAAAGTCAATGGTAAACTCCTAATCCATCTTTTCTCATGATA	CCACAAAGGGCCGAGTTAAG	AGAGAATCCTCTCGCCATCC	CCACAAAGGGCCGAGTTAAGCTGGATCTAAAAGTCAATGGTAAACTCCTAATCCATCTTTTCTCATGATAAGAGAATCCTCTCGCCATCC
337	CTTTCATGTGAGTCGATCATATATTTTCTTAACAAGACCCAATACATTTT	CCACAAAGGGCCGAGTTAAG	AGAGAATCCTCTCGCCATCC	CCACAAAGGGCCGAGTTAAGCTTTCATGTGAGTCGATCATATATTTTCTTAACAAGACCCAATACATTTTAGAGAATCCTCTCGCCATCC
338	TTAACATTAGCATCTTCCATTCGTTTGAGTGTACCCAATGCACCACTAAT	CCACAAAGGGCCGAGTTAAG	AGAGAATCCTCTCGCCATCC	CCACAAAGGGCCGAGTTAAGTTAACATTAGCATCTTCCATTCGTTTGAGTGTACCCAATGCACCACTAATAGAGAATCCTCTCGCCATCC
339	CGTTCTTCTTGCTAAGATTGTTCATATGCTACATGCTTCATATAGCTGAT	CCACAAAGGGCCGAGTTAAG	AGAGAATCCTCTCGCCATCC	CCACAAAGGGCCGAGTTAAGCGTTCTTCTTGCTAAGATTGTTCATATGCTACATGCTTCATATAGCTGATAGAGAATCCTCTCGCCATCC
340	GCTTATTTTATTGTCACTATAAATAGCTAATTGATATAGGCCTTTCGTTA	CCACAAAGGGCCGAGTTAAG	AGAGAATCCTCTCGCCATCC	CCACAAAGGGCCGAGTTAAGGCTTATTTTATTGTCACTATAAATAGCTAATTGATATAGGCCTTTCGTTAAGAGAATCCTCTCGCCATCC
341	CTCCCTATTTATAAGTATTAACCTGAAAATAGTATAAATCTTACACAAAT	CCACAAAGGGCCGAGTTAAG	AGAGAATCCTCTCGCCATCC	CCACAAAGGGCCGAGTTAAGCTCCCTATTTATAAGTATTAACCTGAAAATAGTATAAATCTTACACAAATAGAGAATCCTCTCGCCATCC
342	AGCAAAGGAGTCCATGGAAAGGCAGAAATCTCAAAGAAATTACAGTGAAG	CCACAAAGGGCCGAGTTAAG	AGAGAATCCTCTCGCCATCC	CCACAAAGGGCCGAGTTAAGAGCAAAGGAGTCCATGGAAAGGCAGAAATCTCAAAGAAATTACAGTGAAGAGAGAATCCTCTCGCCATCC
343	TCAAACATATAGCAAGGATGTAAAACAAGGATAGGTGATACTTCTTTTCA	CCACAAAGGGCCGAGTTAAG	AGAGAATCCTCTCGCCATCC	CCACAAAGGGCCGAGTTAAGTCAAACATATAGCAAGGATGTAAAACAAGGATAGGTGATACTTCTTTTCAAGAGAATCCTCTCGCCATCC
344	CTAAAGAGTTTGTTCTTAACCATTTGCTTGCCTCTTCTGCTGTTTAATGT	CCACAAAGGGCCGAGTTAAG	AGAGAATCCTCTCGCCATCC	CCACAAAGGGCCGAGTTAAGCTAAAGAGTTTGTTCTTAACCATTTGCTTGCCTCTTCTGCTGTTTAATGTAGAGAATCCTCTCGCCATCC
345	GCTTTTAGAGATCATGGTACAGGCCTCCATTTCCATTTTGTAGTTCCAAA	CCACAAAGGGCCGAGTTAAG	AGAGAATCCTCTCGCCATCC	CCACAAAGGGCCGAGTTAAGGCTTTTAGAGATCATGGTACAGGCCTCCATTTCCATTTTGTAGTTCCAAAAGAGAATCCTCTCGCCATCC
346	AAATCCTTGATTTTCTTCTTACTGCTTGTGTTAATGCTAACGATTTGAAA	CCACAAAGGGCCGAGTTAAG	AGAGAATCCTCTCGCCATCC	CCACAAAGGGCCGAGTTAAGAAATCCTTGATTTTCTTCTTACTGCTTGTGTTAATGCTAACGATTTGAAAAGAGAATCCTCTCGCCATCC
347	ACTGTACAAGTTTGAGAGCGCAAAATCAGTGGGATTGGATTGGACTCATT	CCACAAAGGGCCGAGTTAAG	AGAGAATCCTCTCGCCATCC	CCACAAAGGGCCGAGTTAAGACTGTACAAGTTTGAGAGCGCAAAATCAGTGGGATTGGATTGGACTCATTAGAGAATCCTCTCGCCATCC
348	TTTCATTCAGAATACGAGTGGCAGATTTATGATCTCCTAGAGCCAGAAGT	CCACAAAGGGCCGAGTTAAG	AGAGAATCCTCTCGCCATCC	CCACAAAGGGCCGAGTTAAGTTTCATTCAGAATACGAGTGGCAGATTTATGATCTCCTAGAGCCAGAAGTAGAGAATCCTCTCGCCATCC
349	AATTAAAAGAATCAAAGGGTTCTACTTAATTAAAATATGTCTGTAGTCAT	CCACAAAGGGCCGAGTTAAG	AGAGAATCCTCTCGCCATCC	CCACAAAGGGCCGAGTTAAGAATTAAAAGAATCAAAGGGTTCTACTTAATTAAAATATGTCTGTAGTCATAGAGAATCCTCTCGCCATCC
350	TACTATAATGATGAACAATAGTATGCAATTAGTTTTGTTTCTTTCTCTTA	CCACAAAGGGCCGAGTTAAG	AGAGAATCCTCTCGCCATCC	CCACAAAGGGCCGAGTTAAGTACTATAATGATGAACAATAGTATGCAATTAGTTTTGTTTCTTTCTCTTAAGAGAATCCTCTCGCCATCC
351	AGACTCACTTTCGCCATCACTCTTCCGCTACTCACTGAAAACTCCCTTCT	CCACAAAGGGCCGAGTTAAG	AGAGAATCCTCTCGCCATCC	CCACAAAGGGCCGAGTTAAGAGACTCACTTTCGCCATCACTCTTCCGCTACTCACTGAAAACTCCCTTCTAGAGAATCCTCTCGCCATCC
352	AAAGCTAGATCAGAAACTATTGAAATACAGAAACAATGGCGGTAATTGAG	CCACAAAGGGCCGAGTTAAG	AGAGAATCCTCTCGCCATCC	CCACAAAGGGCCGAGTTAAGAAAGCTAGATCAGAAACTATTGAAATACAGAAACAATGGCGGTAATTGAGAGAGAATCCTCTCGCCATCC
353	ACTTTGCTTGCAGATACAATAAGTGATGGTTTTAGAGTCTGAGTCCGCAT	CCACAAAGGGCCGAGTTAAG	AGAGAATCCTCTCGCCATCC	CCACAAAGGGCCGAGTTAAGACTTTGCTTGCAGATACAATAAGTGATGGTTTTAGAGTCTGAGTCCGCATAGAGAATCCTCTCGCCATCC
354	AAATTTTGCACAGCAGTAAGTCTTGATAAAACTTAGGGTTAATATATATA	CCACAAAGGGCCGAGTTAAG	AGAGAATCCTCTCGCCATCC	CCACAAAGGGCCGAGTTAAGAAATTTTGCACAGCAGTAAGTCTTGATAAAACTTAGGGTTAATATATATAAGAGAATCCTCTCGCCATCC
355	TTCGTGATCTTTCCTTCAAAATTTGGTTGAGTTCCGCCTCCTGTCTCAGC	CCACAAAGGGCCGAGTTAAG	AGAGAATCCTCTCGCCATCC	CCACAAAGGGCCGAGTTAAGTTCGTGATCTTTCCTTCAAAATTTGGTTGAGTTCCGCCTCCTGTCTCAGCAGAGAATCCTCTCGCCATCC
356	TAGATAAATGCCATAGGTGAGGGTGAAGTTGTTTAATAGGAAAATGCTAT	CCACAAAGGGCCGAGTTAAG	AGAGAATCCTCTCGCCATCC	CCACAAAGGGCCGAGTTAAGTAGATAAATGCCATAGGTGAGGGTGAAGTTGTTTAATAGGAAAATGCTATAGAGAATCCTCTCGCCATCC
357	AGCATATAGGTGCCAGATAGGTGCGAAAACATATCTAATGAATTTGAATG	CCACAAAGGGCCGAGTTAAG	AGAGAATCCTCTCGCCATCC	CCACAAAGGGCCGAGTTAAGAGCATATAGGTGCCAGATAGGTGCGAAAACATATCTAATGAATTTGAATGAGAGAATCCTCTCGCCATCC
358	CATACTTGATATTGTCTTCCTATATCTGCATGTTCTCTCAAACTGTTCAA	CCACAAAGGGCCGAGTTAAG	AGAGAATCCTCTCGCCATCC	CCACAAAGGGCCGAGTTAAGCATACTTGATATTGTCTTCCTATATCTGCATGTTCTCTCAAACTGTTCAAAGAGAATCCTCTCGCCATCC
359	TCTCCTGTGGACCTTCAAGAGCAAATAACCAGTCTTTCAACTCAATTAAT	CCACAAAGGGCCGAGTTAAG	AGAGAATCCTCTCGCCATCC	CCACAAAGGGCCGAGTTAAGTCTCCTGTGGACCTTCAAGAGCAAATAACCAGTCTTTCAACTCAATTAATAGAGAATCCTCTCGCCATCC
360	GGGTTTGAATAATAGGAGGTGAGAAAAGCCAGAGACAAAATTAAAGAGCT	CCACAAAGGGCCGAGTTAAG	AGAGAATCCTCTCGCCATCC	CCACAAAGGGCCGAGTTAAGGGGTTTGAATAATAGGAGGTGAGAAAAGCCAGAGACAAAATTAAAGAGCTAGAGAATCCTCTCGCCATCC
361	CATGTGTGTCTTCAGGTTTGTGGCGGTGTGTTGAGTTGAAAGGCACTTGC	CCACAAAGGGCCGAGTTAAG	AGAGAATCCTCTCGCCATCC	CCACAAAGGGCCGAGTTAAGCATGTGTGTCTTCAGGTTTGTGGCGGTGTGTTGAGTTGAAAGGCACTTGCAGAGAATCCTCTCGCCATCC
362	TTACCTGTTTATAAAACAAAGAGAAAGTATTAAATTCAAGTAACACAAGT	CCACAAAGGGCCGAGTTAAG	AGAGAATCCTCTCGCCATCC	CCACAAAGGGCCGAGTTAAGTTACCTGTTTATAAAACAAAGAGAAAGTATTAAATTCAAGTAACACAAGTAGAGAATCCTCTCGCCATCC
363	TAAAAGCTACAATAGGTAAGGTCCAAATAATCTGGTGAAAAGGTTAGCGC	CCACAAAGGGCCGAGTTAAG	AGAGAATCCTCTCGCCATCC	CCACAAAGGGCCGAGTTAAGTAAAAGCTACAATAGGTAAGGTCCAAATAATCTGGTGAAAAGGTTAGCGCAGAGAATCCTCTCGCCATCC
364	TGTAAAACTGGGTCTGGATATATTAAATAAAGAAACTTACAACCATCACC	CCACAAAGGGCCGAGTTAAG	AGAGAATCCTCTCGCCATCC	CCACAAAGGGCCGAGTTAAGTGTAAAACTGGGTCTGGATATATTAAATAAAGAAACTTACAACCATCACCAGAGAATCCTCTCGCCATCC
365	TCTAAAGTCCAACATGAAAGGGCTAGACAAATGTTTTGTAGACTCCTACT	CCACAAAGGGCCGAGTTAAG	AGAGAATCCTCTCGCCATCC	CCACAAAGGGCCGAGTTAAGTCTAAAGTCCAACATGAAAGGGCTAGACAAATGTTTTGTAGACTCCTACTAGAGAATCCTCTCGCCATCC
366	ATATTCTTAGAATCAGATAAGTTAACGGGAAGGGAGCTTTGGACCAAAAC	CCACAAAGGGCCGAGTTAAG	AGAGAATCCTCTCGCCATCC	CCACAAAGGGCCGAGTTAAGATATTCTTAGAATCAGATAAGTTAACGGGAAGGGAGCTTTGGACCAAAACAGAGAATCCTCTCGCCATCC
367	TTTTCTTGTGGTTGCAGAAACTTGAATGGGAATCTCTATCTATTGATCTT	CCACAAAGGGCCGAGTTAAG	AGAGAATCCTCTCGCCATCC	CCACAAAGGGCCGAGTTAAGTTTTCTTGTGGTTGCAGAAACTTGAATGGGAATCTCTATCTATTGATCTTAGAGAATCCTCTCGCCATCC
368	GCAGAAGATTGCGGATGGTTATTGATGCCATTGGTGACGCCCTGGTTAAT	CCACAAAGGGCCGAGTTAAG	AGAGAATCCTCTCGCCATCC	CCACAAAGGGCCGAGTTAAGGCAGAAGATTGCGGATGGTTATTGATGCCATTGGTGACGCCCTGGTTAATAGAGAATCCTCTCGCCATCC
369	CCAAATACTCTATGATAATCAAGCAATAACTTAACAGATTATACAAATAT	CCACAAAGGGCCGAGTTAAG	AGAGAATCCTCTCGCCATCC	CCACAAAGGGCCGAGTTAAGCCAAATACTCTATGATAATCAAGCAATAACTTAACAGATTATACAAATATAGAGAATCCTCTCGCCATCC
370	GTACAAATTCGATGCTTTGAAACATTTACTCAGATGAAAGAACCATAACC	CCACAAAGGGCCGAGTTAAG	AGAGAATCCTCTCGCCATCC	CCACAAAGGGCCGAGTTAAGGTACAAATTCGATGCTTTGAAACATTTACTCAGATGAAAGAACCATAACCAGAGAATCCTCTCGCCATCC
371	TAACCATAATCTAGAAGATCTTGGGAAAATCAAAACTCTACATTCCTAGA	CCACAAAGGGCCGAGTTAAG	AGAGAATCCTCTCGCCATCC	CCACAAAGGGCCGAGTTAAGTAACCATAATCTAGAAGATCTTGGGAAAATCAAAACTCTACATTCCTAGAAGAGAATCCTCTCGCCATCC
372	TATTTTATCTTTTAGAGTCCTAATCATTTCAGAAAATTGACTGTTAGTAA	CCACAAAGGGCCGAGTTAAG	AGAGAATCCTCTCGCCATCC	CCACAAAGGGCCGAGTTAAGTATTTTATCTTTTAGAGTCCTAATCATTTCAGAAAATTGACTGTTAGTAAAGAGAATCCTCTCGCCATCC
373	ACTGCTATTATATACTGGATAGATTACGTTGTCATTATTCCATTATCGAA	CCACAAAGGGCCGAGTTAAG	AGAGAATCCTCTCGCCATCC	CCACAAAGGGCCGAGTTAAGACTGCTATTATATACTGGATAGATTACGTTGTCATTATTCCATTATCGAAAGAGAATCCTCTCGCCATCC
374	CCCTGCTTAACTTAGAGACATAAATATGGAATTTTGTCGCTATGATAGAG	CCACAAAGGGCCGAGTTAAG	AGAGAATCCTCTCGCCATCC	CCACAAAGGGCCGAGTTAAGCCCTGCTTAACTTAGAGACATAAATATGGAATTTTGTCGCTATGATAGAGAGAGAATCCTCTCGCCATCC
375	GAAAGGGTGTGAACTTATAGATCTTGAGGAGGGATTCTTCGTGGTTAGAT	CCACAAAGGGCCGAGTTAAG	AGAGAATCCTCTCGCCATCC	CCACAAAGGGCCGAGTTAAGGAAAGGGTGTGAACTTATAGATCTTGAGGAGGGATTCTTCGTGGTTAGATAGAGAATCCTCTCGCCATCC
376	GTCCACAACAGGTTCCGAAGTGTATAACTGTCTGTAGAACTCACATGTCA	CCACAAAGGGCCGAGTTAAG	AGAGAATCCTCTCGCCATCC	CCACAAAGGGCCGAGTTAAGGTCCACAACAGGTTCCGAAGTGTATAACTGTCTGTAGAACTCACATGTCAAGAGAATCCTCTCGCCATCC
377	ACTGTGCATGGACTTCTGAGACACACATGGATACAAGCGACCTGTTGCCG	CCACAAAGGGCCGAGTTAAG	AGAGAATCCTCTCGCCATCC	CCACAAAGGGCCGAGTTAAGACTGTGCATGGACTTCTGAGACACACATGGATACAAGCGACCTGTTGCCGAGAGAATCCTCTCGCCATCC
378	GAATCAGCTGGACACGTCTGTTTGGACTTTGACCTCTTCTGGACAGTTTT	CCACAAAGGGCCGAGTTAAG	AGAGAATCCTCTCGCCATCC	CCACAAAGGGCCGAGTTAAGGAATCAGCTGGACACGTCTGTTTGGACTTTGACCTCTTCTGGACAGTTTTAGAGAATCCTCTCGCCATCC
379	GGATTACGTTTAGAATTTAGATAAATGATGACAAAGAAGACCGGAATTTC	CCACAAAGGGCCGAGTTAAG	AGAGAATCCTCTCGCCATCC	CCACAAAGGGCCGAGTTAAGGGATTACGTTTAGAATTTAGATAAATGATGACAAAGAAGACCGGAATTTCAGAGAATCCTCTCGCCATCC
380	TTTTCCCTTCCTGCAAATGAAATTGTAAATTCTTTGATGTATCTAGGTTT	CCACAAAGGGCCGAGTTAAG	AGAGAATCCTCTCGCCATCC	CCACAAAGGGCCGAGTTAAGTTTTCCCTTCCTGCAAATGAAATTGTAAATTCTTTGATGTATCTAGGTTTAGAGAATCCTCTCGCCATCC
381	GGTGTCATCATTTTCTGCTTCCAACACCGAAAGCATCCAAAACAGTGCAA	CCACAAAGGGCCGAGTTAAG	AGAGAATCCTCTCGCCATCC	CCACAAAGGGCCGAGTTAAGGGTGTCATCATTTTCTGCTTCCAACACCGAAAGCATCCAAAACAGTGCAAAGAGAATCCTCTCGCCATCC
382	TTATTCGTGGTGGATGATTTGCTTAATAGTAGTATCTGGAATGATGTTAG	CCACAAAGGGCCGAGTTAAG	AGAGAATCCTCTCGCCATCC	CCACAAAGGGCCGAGTTAAGTTATTCGTGGTGGATGATTTGCTTAATAGTAGTATCTGGAATGATGTTAGAGAGAATCCTCTCGCCATCC
383	AAACTTACACCTTCTTCTAGTTTTCCAAGTCCAGCTTCTAATGGGAGCTT	CCACAAAGGGCCGAGTTAAG	AGAGAATCCTCTCGCCATCC	CCACAAAGGGCCGAGTTAAGAAACTTACACCTTCTTCTAGTTTTCCAAGTCCAGCTTCTAATGGGAGCTTAGAGAATCCTCTCGCCATCC
384	ACTAGTTTAAAGGCCAATTTGAGCTTCAGTTTTGATTATTCTTTCTTACC	CCACAAAGGGCCGAGTTAAG	AGAGAATCCTCTCGCCATCC	CCACAAAGGGCCGAGTTAAGACTAGTTTAAAGGCCAATTTGAGCTTCAGTTTTGATTATTCTTTCTTACCAGAGAATCCTCTCGCCATCC
385	GTTATACAGGACATCAGTTTCAGTAGAGATAGTCAATGGATTATGATAAG	CCACAAAGGGCCGAGTTAAG	AGAGAATCCTCTCGCCATCC	CCACAAAGGGCCGAGTTAAGGTTATACAGGACATCAGTTTCAGTAGAGATAGTCAATGGATTATGATAAGAGAGAATCCTCTCGCCATCC
386	AGGAGTCTGCAATTGTTTTCGTGGCTTTATTTTAGTAGTTTGGCTTGGTT	CCACAAAGGGCCGAGTTAAG	AGAGAATCCTCTCGCCATCC	CCACAAAGGGCCGAGTTAAGAGGAGTCTGCAATTGTTTTCGTGGCTTTATTTTAGTAGTTTGGCTTGGTTAGAGAATCCTCTCGCCATCC
387	TGTAGATATCTGAAGAGGTTATGCACTAAGGTTAGATTCATGTTTTGGAT	CCACAAAGGGCCGAGTTAAG	AGAGAATCCTCTCGCCATCC	CCACAAAGGGCCGAGTTAAGTGTAGATATCTGAAGAGGTTATGCACTAAGGTTAGATTCATGTTTTGGATAGAGAATCCTCTCGCCATCC
388	CTTGCTAATTATTATGCAGTAATGTAATTCATCAGCTTTTGACACTTTGC	CCACAAAGGGCCGAGTTAAG	AGAGAATCCTCTCGCCATCC	CCACAAAGGGCCGAGTTAAGCTTGCTAATTATTATGCAGTAATGTAATTCATCAGCTTTTGACACTTTGCAGAGAATCCTCTCGCCATCC
389	CCACGTGGCGGTACAGGTATTCTTGAATTTTCGCATTCCTTGTCCTCTGT	CCACAAAGGGCCGAGTTAAG	AGAGAATCCTCTCGCCATCC	CCACAAAGGGCCGAGTTAAGCCACGTGGCGGTACAGGTATTCTTGAATTTTCGCATTCCTTGTCCTCTGTAGAGAATCCTCTCGCCATCC
390	AATCAGCACATGTTTACTTTCATATCATGGGTATTATAGTATTTGTATTC	CCACAAAGGGCCGAGTTAAG	AGAGAATCCTCTCGCCATCC	CCACAAAGGGCCGAGTTAAGAATCAGCACATGTTTACTTTCATATCATGGGTATTATAGTATTTGTATTCAGAGAATCCTCTCGCCATCC
391	GCACTATCTTCCACCTTAGAGAAGCCCTTAAACAACCCCAAACTAGCTGG	CCACAAAGGGCCGAGTTAAG	AGAGAATCCTCTCGCCATCC	CCACAAAGGGCCGAGTTAAGGCACTATCTTCCACCTTAGAGAAGCCCTTAAACAACCCCAAACTAGCTGGAGAGAATCCTCTCGCCATCC
392	AGCCTATAACATCACATAGATTAAGAAAGCAGGTTATACATTATATATAG	CCACAAAGGGCCGAGTTAAG	AGAGAATCCTCTCGCCATCC	CCACAAAGGGCCGAGTTAAGAGCCTATAACATCACATAGATTAAGAAAGCAGGTTATACATTATATATAGAGAGAATCCTCTCGCCATCC
393	ATGATAGGTGGTGTTACGGCATTATAGGGATTTTCTTTCTTTTATTGGGC	CCACAAAGGGCCGAGTTAAG	AGAGAATCCTCTCGCCATCC	CCACAAAGGGCCGAGTTAAGATGATAGGTGGTGTTACGGCATTATAGGGATTTTCTTTCTTTTATTGGGCAGAGAATCCTCTCGCCATCC
394	ATACTCTGATCTTTGACTGGGAAGCGATGAGTAGTATTTTCCTTCTTTAA	CCACAAAGGGCCGAGTTAAG	AGAGAATCCTCTCGCCATCC	CCACAAAGGGCCGAGTTAAGATACTCTGATCTTTGACTGGGAAGCGATGAGTAGTATTTTCCTTCTTTAAAGAGAATCCTCTCGCCATCC
395	GGGTTTCTACTGGGTTGAAAATGCTACGGTTCCGATACTGCCAGAGTGAC	CCACAAAGGGCCGAGTTAAG	AGAGAATCCTCTCGCCATCC	CCACAAAGGGCCGAGTTAAGGGGTTTCTACTGGGTTGAAAATGCTACGGTTCCGATACTGCCAGAGTGACAGAGAATCCTCTCGCCATCC
396	AAGAATAGTTGCAGTGTCTTGATAATAGGATTTTGTTTGAGGAAGATTCT	CCACAAAGGGCCGAGTTAAG	AGAGAATCCTCTCGCCATCC	CCACAAAGGGCCGAGTTAAGAAGAATAGTTGCAGTGTCTTGATAATAGGATTTTGTTTGAGGAAGATTCTAGAGAATCCTCTCGCCATCC
397	CTACCTTAAGAAAATTTGTATAGTGGATGGAAGAAACCCCTGTGACATAT	CCACAAAGGGCCGAGTTAAG	AGAGAATCCTCTCGCCATCC	CCACAAAGGGCCGAGTTAAGCTACCTTAAGAAAATTTGTATAGTGGATGGAAGAAACCCCTGTGACATATAGAGAATCCTCTCGCCATCC
398	TTAGAAAAGTTGTGTGTTATATATAATACTACACCCACCCCACCCAAGTG	CCACAAAGGGCCGAGTTAAG	AGAGAATCCTCTCGCCATCC	CCACAAAGGGCCGAGTTAAGTTAGAAAAGTTGTGTGTTATATATAATACTACACCCACCCCACCCAAGTGAGAGAATCCTCTCGCCATCC
399	TTGCGTTTCTTTCAAGCGATCCCCTGTAGATCCACTCTTAGAGAGACGTT	CCACAAAGGGCCGAGTTAAG	AGAGAATCCTCTCGCCATCC	CCACAAAGGGCCGAGTTAAGTTGCGTTTCTTTCAAGCGATCCCCTGTAGATCCACTCTTAGAGAGACGTTAGAGAATCCTCTCGCCATCC
400	GAGTCAAAGGTCCATTAGTTTATCACCAAGTTGAAATAGAGATGTATGCC	CCACAAAGGGCCGAGTTAAG	AGAGAATCCTCTCGCCATCC	CCACAAAGGGCCGAGTTAAGGAGTCAAAGGTCCATTAGTTTATCACCAAGTTGAAATAGAGATGTATGCCAGAGAATCCTCTCGCCATCC
401	TTAATGAAAGGTTGAAAATTAAGAACAAATTCAATTACAAGGTTAGTCTG	CCACAAAGGGCCGAGTTAAG	AGAGAATCCTCTCGCCATCC	CCACAAAGGGCCGAGTTAAGTTAATGAAAGGTTGAAAATTAAGAACAAATTCAATTACAAGGTTAGTCTGAGAGAATCCTCTCGCCATCC
402	ATACTTGCTCTGAAAATTTCAACAAAAGCATCCGCATAAACAAGTAAATA	CCACAAAGGGCCGAGTTAAG	AGAGAATCCTCTCGCCATCC	CCACAAAGGGCCGAGTTAAGATACTTGCTCTGAAAATTTCAACAAAAGCATCCGCATAAACAAGTAAATAAGAGAATCCTCTCGCCATCC
403	TCTTCTACTCCAATTTCTCCTAATGTAAGCCCGCCTCTCTTTTCCTTTCC	CCACAAAGGGCCGAGTTAAG	AGAGAATCCTCTCGCCATCC	CCACAAAGGGCCGAGTTAAGTCTTCTACTCCAATTTCTCCTAATGTAAGCCCGCCTCTCTTTTCCTTTCCAGAGAATCCTCTCGCCATCC
404	CTAACTTTTATATTTGTTAAACCCAGACTATTTGGATCTTTTGTTCGTTT	CCACAAAGGGCCGAGTTAAG	AGAGAATCCTCTCGCCATCC	CCACAAAGGGCCGAGTTAAGCTAACTTTTATATTTGTTAAACCCAGACTATTTGGATCTTTTGTTCGTTTAGAGAATCCTCTCGCCATCC
405	TATTTTCCATTCTGCTACTAATGCACGGTAAATCATTCCTGGCCTTCCTT	CCACAAAGGGCCGAGTTAAG	AGAGAATCCTCTCGCCATCC	CCACAAAGGGCCGAGTTAAGTATTTTCCATTCTGCTACTAATGCACGGTAAATCATTCCTGGCCTTCCTTAGAGAATCCTCTCGCCATCC
406	TATATATTTGTAACTCAATTTTAATTAGTCTGAGTTGCCCCTAACTAAAA	CCACAAAGGGCCGAGTTAAG	AGAGAATCCTCTCGCCATCC	CCACAAAGGGCCGAGTTAAGTATATATTTGTAACTCAATTTTAATTAGTCTGAGTTGCCCCTAACTAAAAAGAGAATCCTCTCGCCATCC
407	TAAACCTCCTTCTTAACTCTCACTAGCTTTAAGTATTAGAAAGTCTAAGA	CCACAAAGGGCCGAGTTAAG	AGAGAATCCTCTCGCCATCC	CCACAAAGGGCCGAGTTAAGTAAACCTCCTTCTTAACTCTCACTAGCTTTAAGTATTAGAAAGTCTAAGAAGAGAATCCTCTCGCCATCC
408	TGACAATTATAACAAAGTATCGAAATATCTATGCTCGTAAATGTCAATGA	CCACAAAGGGCCGAGTTAAG	AGAGAATCCTCTCGCCATCC	CCACAAAGGGCCGAGTTAAGTGACAATTATAACAAAGTATCGAAATATCTATGCTCGTAAATGTCAATGAAGAGAATCCTCTCGCCATCC
409	CCAAACGTATAGTTGAAGTGTGAGGACAGTCAAAGATAAAGAAAGGCACT	CCACAAAGGGCCGAGTTAAG	AGAGAATCCTCTCGCCATCC	CCACAAAGGGCCGAGTTAAGCCAAACGTATAGTTGAAGTGTGAGGACAGTCAAAGATAAAGAAAGGCACTAGAGAATCCTCTCGCCATCC
410	TCAGCTGTGTACATACTATTATGGGATGATGATGATGTTACAGAATTCAC	CCACAAAGGGCCGAGTTAAG	AGAGAATCCTCTCGCCATCC	CCACAAAGGGCCGAGTTAAGTCAGCTGTGTACATACTATTATGGGATGATGATGATGTTACAGAATTCACAGAGAATCCTCTCGCCATCC
411	CATTTTATGTGGAAATAAATTGAGAGAAGAAAAGTGAACAAAAGGACCCC	CCACAAAGGGCCGAGTTAAG	AGAGAATCCTCTCGCCATCC	CCACAAAGGGCCGAGTTAAGCATTTTATGTGGAAATAAATTGAGAGAAGAAAAGTGAACAAAAGGACCCCAGAGAATCCTCTCGCCATCC
412	CTCGCTCGAATTTCAGTTACAGCATCGCCAGCCAGATTTGAATCCTGTTT	CCACAAAGGGCCGAGTTAAG	AGAGAATCCTCTCGCCATCC	CCACAAAGGGCCGAGTTAAGCTCGCTCGAATTTCAGTTACAGCATCGCCAGCCAGATTTGAATCCTGTTTAGAGAATCCTCTCGCCATCC
413	AAAATGAATATTTGTCACCACTCAAGCTTACGACTTTGAACTTGGTATTA	CCACAAAGGGCCGAGTTAAG	AGAGAATCCTCTCGCCATCC	CCACAAAGGGCCGAGTTAAGAAAATGAATATTTGTCACCACTCAAGCTTACGACTTTGAACTTGGTATTAAGAGAATCCTCTCGCCATCC
414	ATTGATTACTATTATTTCTATGGAAGGTGATAATATATTATAGTAAAAGT	CCACAAAGGGCCGAGTTAAG	AGAGAATCCTCTCGCCATCC	CCACAAAGGGCCGAGTTAAGATTGATTACTATTATTTCTATGGAAGGTGATAATATATTATAGTAAAAGTAGAGAATCCTCTCGCCATCC
415	GGCTGGAATACTTTATATATCTCTTAAGTTAAGTTAGGAAGCAGGATACA	CCACAAAGGGCCGAGTTAAG	AGAGAATCCTCTCGCCATCC	CCACAAAGGGCCGAGTTAAGGGCTGGAATACTTTATATATCTCTTAAGTTAAGTTAGGAAGCAGGATACAAGAGAATCCTCTCGCCATCC
416	CCCCATGCTTGTTGTCTCCTATGGTATCGGCTCAGAAATTCAACTGTACT	CCACAAAGGGCCGAGTTAAG	AGAGAATCCTCTCGCCATCC	CCACAAAGGGCCGAGTTAAGCCCCATGCTTGTTGTCTCCTATGGTATCGGCTCAGAAATTCAACTGTACTAGAGAATCCTCTCGCCATCC
417	TGAATATACTGACTAGAAGGATCTTGGGATGAGAAGTCCTTTGCCTTGTT	CCACAAAGGGCCGAGTTAAG	AGAGAATCCTCTCGCCATCC	CCACAAAGGGCCGAGTTAAGTGAATATACTGACTAGAAGGATCTTGGGATGAGAAGTCCTTTGCCTTGTTAGAGAATCCTCTCGCCATCC
418	CTGAGGTGTTACAGCGGTGATCTTTCTCGTCTTGGGACAGCAGAACGGTT	CCACAAAGGGCCGAGTTAAG	AGAGAATCCTCTCGCCATCC	CCACAAAGGGCCGAGTTAAGCTGAGGTGTTACAGCGGTGATCTTTCTCGTCTTGGGACAGCAGAACGGTTAGAGAATCCTCTCGCCATCC
419	TGAAATTATGTCATTTAAACTGAACTAATACAATAGATCGCTTTCTATAT	CCACAAAGGGCCGAGTTAAG	AGAGAATCCTCTCGCCATCC	CCACAAAGGGCCGAGTTAAGTGAAATTATGTCATTTAAACTGAACTAATACAATAGATCGCTTTCTATATAGAGAATCCTCTCGCCATCC
420	CTTGTAGAGGAAAAGATATCATAACAGATTTTGCAATACATACCCCTGAG	CCACAAAGGGCCGAGTTAAG	AGAGAATCCTCTCGCCATCC	CCACAAAGGGCCGAGTTAAGCTTGTAGAGGAAAAGATATCATAACAGATTTTGCAATACATACCCCTGAGAGAGAATCCTCTCGCCATCC
421	ATTTATCCATTGAAGTTTTATATTCATGGCTGGGGATGTTTATATGACCT	CCACAAAGGGCCGAGTTAAG	AGAGAATCCTCTCGCCATCC	CCACAAAGGGCCGAGTTAAGATTTATCCATTGAAGTTTTATATTCATGGCTGGGGATGTTTATATGACCTAGAGAATCCTCTCGCCATCC
422	CTTATTACAACATATCAGGAATGTCAGTTTCAGCGTTTGTGTAAAGGGCG	CCACAAAGGGCCGAGTTAAG	AGAGAATCCTCTCGCCATCC	CCACAAAGGGCCGAGTTAAGCTTATTACAACATATCAGGAATGTCAGTTTCAGCGTTTGTGTAAAGGGCGAGAGAATCCTCTCGCCATCC
423	ATGTCCCTTAGATCCCTAATTACTCAGGTGTTTATTTAGTTATTCCAGAG	CCACAAAGGGCCGAGTTAAG	AGAGAATCCTCTCGCCATCC	CCACAAAGGGCCGAGTTAAGATGTCCCTTAGATCCCTAATTACTCAGGTGTTTATTTAGTTATTCCAGAGAGAGAATCCTCTCGCCATCC
424	ACTATTGAAAGTATAGTGATCCTCTGGAGAACTTTATAAACTAATTATTT	CCACAAAGGGCCGAGTTAAG	AGAGAATCCTCTCGCCATCC	CCACAAAGGGCCGAGTTAAGACTATTGAAAGTATAGTGATCCTCTGGAGAACTTTATAAACTAATTATTTAGAGAATCCTCTCGCCATCC
425	ATTAGATGTTGCATTCAAGCGTAAAGTCTTAGAAAGTGTTGTTGATTTTC	CCACAAAGGGCCGAGTTAAG	AGAGAATCCTCTCGCCATCC	CCACAAAGGGCCGAGTTAAGATTAGATGTTGCATTCAAGCGTAAAGTCTTAGAAAGTGTTGTTGATTTTCAGAGAATCCTCTCGCCATCC
426	ACTCCCTCAAAATTGTTTCCACATGATTCTTGATTTGAGAAATTTGATCA	CCACAAAGGGCCGAGTTAAG	AGAGAATCCTCTCGCCATCC	CCACAAAGGGCCGAGTTAAGACTCCCTCAAAATTGTTTCCACATGATTCTTGATTTGAGAAATTTGATCAAGAGAATCCTCTCGCCATCC
427	TGCAGAAGAAAATTTCCTGCAACCAATAAGAGGGACAATTGAGATTTCTG	CCACAAAGGGCCGAGTTAAG	AGAGAATCCTCTCGCCATCC	CCACAAAGGGCCGAGTTAAGTGCAGAAGAAAATTTCCTGCAACCAATAAGAGGGACAATTGAGATTTCTGAGAGAATCCTCTCGCCATCC
428	CTAGATTCTGTAAGTTGACAATAGATGATGGTAAAGCTATCAAGTTTCCT	CCACAAAGGGCCGAGTTAAG	AGAGAATCCTCTCGCCATCC	CCACAAAGGGCCGAGTTAAGCTAGATTCTGTAAGTTGACAATAGATGATGGTAAAGCTATCAAGTTTCCTAGAGAATCCTCTCGCCATCC
429	TGGTGCAATTCATCTACTGCCAATTCAGCTAGGGATATTGAGGAAGAACA	CCACAAAGGGCCGAGTTAAG	AGAGAATCCTCTCGCCATCC	CCACAAAGGGCCGAGTTAAGTGGTGCAATTCATCTACTGCCAATTCAGCTAGGGATATTGAGGAAGAACAAGAGAATCCTCTCGCCATCC
430	GTGTTCAAATTCATTAAATAATTATGCCTAGTGTCACCCATTGTTATCGC	CCACAAAGGGCCGAGTTAAG	AGAGAATCCTCTCGCCATCC	CCACAAAGGGCCGAGTTAAGGTGTTCAAATTCATTAAATAATTATGCCTAGTGTCACCCATTGTTATCGCAGAGAATCCTCTCGCCATCC
431	ATGTAATGATCCCTCTGTAATTTACTTATTAATCGACAAATATATATATA	CCACAAAGGGCCGAGTTAAG	AGAGAATCCTCTCGCCATCC	CCACAAAGGGCCGAGTTAAGATGTAATGATCCCTCTGTAATTTACTTATTAATCGACAAATATATATATAAGAGAATCCTCTCGCCATCC
432	AATATTAAACATGAACTATATAATGGTTAAAATCTATAGAAATATAATAC	CCACAAAGGGCCGAGTTAAG	AGAGAATCCTCTCGCCATCC	CCACAAAGGGCCGAGTTAAGAATATTAAACATGAACTATATAATGGTTAAAATCTATAGAAATATAATACAGAGAATCCTCTCGCCATCC
433	CATCTGTCTTTATTTCAAAGATGCAGTAGTTTGTCTGTTTCTGAAAATCA	CCACAAAGGGCCGAGTTAAG	AGAGAATCCTCTCGCCATCC	CCACAAAGGGCCGAGTTAAGCATCTGTCTTTATTTCAAAGATGCAGTAGTTTGTCTGTTTCTGAAAATCAAGAGAATCCTCTCGCCATCC
434	ATTAACTTTCCTATTTCTAATTCTATTAAGTCTACCAAAGCTTCTCTTGA	CCACAAAGGGCCGAGTTAAG	AGAGAATCCTCTCGCCATCC	CCACAAAGGGCCGAGTTAAGATTAACTTTCCTATTTCTAATTCTATTAAGTCTACCAAAGCTTCTCTTGAAGAGAATCCTCTCGCCATCC
435	CCACGAGGAAGGAACTCAAAGGCGGAATAGGGGTTTTCACGACTTCCACT	CCACAAAGGGCCGAGTTAAG	AGAGAATCCTCTCGCCATCC	CCACAAAGGGCCGAGTTAAGCCACGAGGAAGGAACTCAAAGGCGGAATAGGGGTTTTCACGACTTCCACTAGAGAATCCTCTCGCCATCC
436	TCCGCTGCATCCAGAGGAATAAATGGAATATCTTTGGCTGGAGTAGTATC	CCACAAAGGGCCGAGTTAAG	AGAGAATCCTCTCGCCATCC	CCACAAAGGGCCGAGTTAAGTCCGCTGCATCCAGAGGAATAAATGGAATATCTTTGGCTGGAGTAGTATCAGAGAATCCTCTCGCCATCC
437	GTTTTCTACTTAAACAAATTACAAACAATCTGGACGAAATTTAACTCTAC	CCACAAAGGGCCGAGTTAAG	AGAGAATCCTCTCGCCATCC	CCACAAAGGGCCGAGTTAAGGTTTTCTACTTAAACAAATTACAAACAATCTGGACGAAATTTAACTCTACAGAGAATCCTCTCGCCATCC
438	GTCAAGAACAGTTAATGAAGGGATTAAAGGTGCGGATAAATCAATCTCCA	CCACAAAGGGCCGAGTTAAG	AGAGAATCCTCTCGCCATCC	CCACAAAGGGCCGAGTTAAGGTCAAGAACAGTTAATGAAGGGATTAAAGGTGCGGATAAATCAATCTCCAAGAGAATCCTCTCGCCATCC
439	AGTTCTCTAGGTCCATCTAAGGATCCCCAGCCACATAATTCCAGAAATAC	CCACAAAGGGCCGAGTTAAG	AGAGAATCCTCTCGCCATCC	CCACAAAGGGCCGAGTTAAGAGTTCTCTAGGTCCATCTAAGGATCCCCAGCCACATAATTCCAGAAATACAGAGAATCCTCTCGCCATCC
440	AACAGCTTAGATCATCACATCTTGAGAGGCTAGAGGAACAACTACAGGTA	CCACAAAGGGCCGAGTTAAG	AGAGAATCCTCTCGCCATCC	CCACAAAGGGCCGAGTTAAGAACAGCTTAGATCATCACATCTTGAGAGGCTAGAGGAACAACTACAGGTAAGAGAATCCTCTCGCCATCC
441	CACCGTCACAGCTTAAACAATTCCGCCCCATTTCGTTGTGCAATGTCTTG	CCACAAAGGGCCGAGTTAAG	AGAGAATCCTCTCGCCATCC	CCACAAAGGGCCGAGTTAAGCACCGTCACAGCTTAAACAATTCCGCCCCATTTCGTTGTGCAATGTCTTGAGAGAATCCTCTCGCCATCC
442	GGGGATTCTCTCAGGTTTGATGAATTTTGATATGAAACTGTGTCTGTATT	CCACAAAGGGCCGAGTTAAG	AGAGAATCCTCTCGCCATCC	CCACAAAGGGCCGAGTTAAGGGGGATTCTCTCAGGTTTGATGAATTTTGATATGAAACTGTGTCTGTATTAGAGAATCCTCTCGCCATCC
443	ACATTGCCATCTTAGGAAAAGAATCGAACCCATCAATTCAATTCAAGAAC	CCACAAAGGGCCGAGTTAAG	AGAGAATCCTCTCGCCATCC	CCACAAAGGGCCGAGTTAAGACATTGCCATCTTAGGAAAAGAATCGAACCCATCAATTCAATTCAAGAACAGAGAATCCTCTCGCCATCC
444	AATATATATATTCGAAATTACTATATTCATTAATTCACCTTCAATTTAAG	CCACAAAGGGCCGAGTTAAG	AGAGAATCCTCTCGCCATCC	CCACAAAGGGCCGAGTTAAGAATATATATATTCGAAATTACTATATTCATTAATTCACCTTCAATTTAAGAGAGAATCCTCTCGCCATCC
445	TCTTCTCTCTTTCTTTAATCACTTTCTTCCAATTCTCTGCACTGTCAATG	CCACAAAGGGCCGAGTTAAG	AGAGAATCCTCTCGCCATCC	CCACAAAGGGCCGAGTTAAGTCTTCTCTCTTTCTTTAATCACTTTCTTCCAATTCTCTGCACTGTCAATGAGAGAATCCTCTCGCCATCC
446	ATACAGTCAAAATCATATCTGGGCGTGACAAAGGTAAAATTGGAGAAATC	CCACAAAGGGCCGAGTTAAG	AGAGAATCCTCTCGCCATCC	CCACAAAGGGCCGAGTTAAGATACAGTCAAAATCATATCTGGGCGTGACAAAGGTAAAATTGGAGAAATCAGAGAATCCTCTCGCCATCC
447	CCATCGCTTAAGCTGCACAAGGATAAAAGAATCGTTAGTAAATGATATTT	CCACAAAGGGCCGAGTTAAG	AGAGAATCCTCTCGCCATCC	CCACAAAGGGCCGAGTTAAGCCATCGCTTAAGCTGCACAAGGATAAAAGAATCGTTAGTAAATGATATTTAGAGAATCCTCTCGCCATCC
448	TTGAACAAAGTTAGACATGGTAGTCATCCTTTTGATAATTTCTTTGCATG	CCACAAAGGGCCGAGTTAAG	AGAGAATCCTCTCGCCATCC	CCACAAAGGGCCGAGTTAAGTTGAACAAAGTTAGACATGGTAGTCATCCTTTTGATAATTTCTTTGCATGAGAGAATCCTCTCGCCATCC
449	AAGAAGAAGAAGATATACAATACTAGCTATCTAATTTAAGCACTTTGAAG	CCACAAAGGGCCGAGTTAAG	AGAGAATCCTCTCGCCATCC	CCACAAAGGGCCGAGTTAAGAAGAAGAAGAAGATATACAATACTAGCTATCTAATTTAAGCACTTTGAAGAGAGAATCCTCTCGCCATCC
450	CAGATACTAATTAAATGACAGATTATCTCTTGAACGATGTTCATTGAAAT	CCACAAAGGGCCGAGTTAAG	AGAGAATCCTCTCGCCATCC	CCACAAAGGGCCGAGTTAAGCAGATACTAATTAAATGACAGATTATCTCTTGAACGATGTTCATTGAAATAGAGAATCCTCTCGCCATCC
451	CTGGATTTCTATTTGTGTGACTTGTGAAATATTAAACAGAAAGCTTGATT	CCACAAAGGGCCGAGTTAAG	AGAGAATCCTCTCGCCATCC	CCACAAAGGGCCGAGTTAAGCTGGATTTCTATTTGTGTGACTTGTGAAATATTAAACAGAAAGCTTGATTAGAGAATCCTCTCGCCATCC
452	AATGTGAACTAAACTTGGACCATGACTTAGAATATCAACTTATGCGTTTT	CCACAAAGGGCCGAGTTAAG	AGAGAATCCTCTCGCCATCC	CCACAAAGGGCCGAGTTAAGAATGTGAACTAAACTTGGACCATGACTTAGAATATCAACTTATGCGTTTTAGAGAATCCTCTCGCCATCC
453	ATCTTCTTCTGTTTCTCTATTTTCTAGTTCGTTCTTTCACTAAGCTGACA	CCACAAAGGGCCGAGTTAAG	AGAGAATCCTCTCGCCATCC	CCACAAAGGGCCGAGTTAAGATCTTCTTCTGTTTCTCTATTTTCTAGTTCGTTCTTTCACTAAGCTGACAAGAGAATCCTCTCGCCATCC
454	GTCGTTGAGTTCTTGCAGATCAAATTTACCCTCCAGACGTGAATCAACAA	CCACAAAGGGCCGAGTTAAG	AGAGAATCCTCTCGCCATCC	CCACAAAGGGCCGAGTTAAGGTCGTTGAGTTCTTGCAGATCAAATTTACCCTCCAGACGTGAATCAACAAAGAGAATCCTCTCGCCATCC
455	TCATTTATATAGTAAGTTGTGGAAACTCTAAATTAAGAAATCTTTGTTTT	CCACAAAGGGCCGAGTTAAG	AGAGAATCCTCTCGCCATCC	CCACAAAGGGCCGAGTTAAGTCATTTATATAGTAAGTTGTGGAAACTCTAAATTAAGAAATCTTTGTTTTAGAGAATCCTCTCGCCATCC
456	ATATATTCTATATTAATAAACAACGTTGGAGTATAACAAATTTTCAAACG	CCACAAAGGGCCGAGTTAAG	AGAGAATCCTCTCGCCATCC	CCACAAAGGGCCGAGTTAAGATATATTCTATATTAATAAACAACGTTGGAGTATAACAAATTTTCAAACGAGAGAATCCTCTCGCCATCC
457	TTTAGGAGTAGCATTTGTTAAGAATTATATAAATATAAAGGGTATTAATA	CCACAAAGGGCCGAGTTAAG	AGAGAATCCTCTCGCCATCC	CCACAAAGGGCCGAGTTAAGTTTAGGAGTAGCATTTGTTAAGAATTATATAAATATAAAGGGTATTAATAAGAGAATCCTCTCGCCATCC
458	AATTTCTTCATTTTCTTAACCATAAATCGTTTATTAACAAGCTAAAGTAG	CCACAAAGGGCCGAGTTAAG	AGAGAATCCTCTCGCCATCC	CCACAAAGGGCCGAGTTAAGAATTTCTTCATTTTCTTAACCATAAATCGTTTATTAACAAGCTAAAGTAGAGAGAATCCTCTCGCCATCC
459	AGAAATACCACTATTTATATGAAATTATTACTTTCTTAAATTACTTTTGA	CCACAAAGGGCCGAGTTAAG	AGAGAATCCTCTCGCCATCC	CCACAAAGGGCCGAGTTAAGAGAAATACCACTATTTATATGAAATTATTACTTTCTTAAATTACTTTTGAAGAGAATCCTCTCGCCATCC
460	ATCATTACACCCAAAGCAGTCTCCACACGAAACGACAACCTACCTATAAA	CCACAAAGGGCCGAGTTAAG	AGAGAATCCTCTCGCCATCC	CCACAAAGGGCCGAGTTAAGATCATTACACCCAAAGCAGTCTCCACACGAAACGACAACCTACCTATAAAAGAGAATCCTCTCGCCATCC
461	TTTACAGAGGTAGACATATATGATGAAAATGACTTTATTATTGTGATGTC	CCACAAAGGGCCGAGTTAAG	AGAGAATCCTCTCGCCATCC	CCACAAAGGGCCGAGTTAAGTTTACAGAGGTAGACATATATGATGAAAATGACTTTATTATTGTGATGTCAGAGAATCCTCTCGCCATCC
462	GAAAACTTTACTTAATTTGACGAAGTTGACAGCATTACCACTTACAACAA	CCACAAAGGGCCGAGTTAAG	AGAGAATCCTCTCGCCATCC	CCACAAAGGGCCGAGTTAAGGAAAACTTTACTTAATTTGACGAAGTTGACAGCATTACCACTTACAACAAAGAGAATCCTCTCGCCATCC
463	CTAATCAAATATCTCAAAATGCACAAAATCACCACCAAATCACTATTTAT	CCACAAAGGGCCGAGTTAAG	AGAGAATCCTCTCGCCATCC	CCACAAAGGGCCGAGTTAAGCTAATCAAATATCTCAAAATGCACAAAATCACCACCAAATCACTATTTATAGAGAATCCTCTCGCCATCC
464	ATGTCCATGAACTAGAAAGTCGATCGAAGCCAATTCATCCAATATATCTT	CCACAAAGGGCCGAGTTAAG	AGAGAATCCTCTCGCCATCC	CCACAAAGGGCCGAGTTAAGATGTCCATGAACTAGAAAGTCGATCGAAGCCAATTCATCCAATATATCTTAGAGAATCCTCTCGCCATCC
465	GGCAGGCCTATATTCATTTTCAACAATCATGGACTAGACTTATATTCATT	CCACAAAGGGCCGAGTTAAG	AGAGAATCCTCTCGCCATCC	CCACAAAGGGCCGAGTTAAGGGCAGGCCTATATTCATTTTCAACAATCATGGACTAGACTTATATTCATTAGAGAATCCTCTCGCCATCC
466	GGAATTTCTATTATTATGATAAACTGAGTACTATTATACTTAAGTGGATT	CCACAAAGGGCCGAGTTAAG	AGAGAATCCTCTCGCCATCC	CCACAAAGGGCCGAGTTAAGGGAATTTCTATTATTATGATAAACTGAGTACTATTATACTTAAGTGGATTAGAGAATCCTCTCGCCATCC
467	GGAATGGAGATTTGATTTTATATATAGAGGAGAAAGGAAGAAAGAGGAGG	CCACAAAGGGCCGAGTTAAG	AGAGAATCCTCTCGCCATCC	CCACAAAGGGCCGAGTTAAGGGAATGGAGATTTGATTTTATATATAGAGGAGAAAGGAAGAAAGAGGAGGAGAGAATCCTCTCGCCATCC
468	TATTATTATTTTAGGGTAGAGAGTGATGTAAATATTTTGTCTTAGCTTTG	CCACAAAGGGCCGAGTTAAG	AGAGAATCCTCTCGCCATCC	CCACAAAGGGCCGAGTTAAGTATTATTATTTTAGGGTAGAGAGTGATGTAAATATTTTGTCTTAGCTTTGAGAGAATCCTCTCGCCATCC
469	TTGACTCTTGGTTTTAGATTAAATATGGGATTGATATGGAAGTATTTGAT	CCACAAAGGGCCGAGTTAAG	AGAGAATCCTCTCGCCATCC	CCACAAAGGGCCGAGTTAAGTTGACTCTTGGTTTTAGATTAAATATGGGATTGATATGGAAGTATTTGATAGAGAATCCTCTCGCCATCC
470	CTATCAGAGTTTCAGACTATCCTCCCAACCCAAGAGAAGCTTTTAAATTT	CCACAAAGGGCCGAGTTAAG	AGAGAATCCTCTCGCCATCC	CCACAAAGGGCCGAGTTAAGCTATCAGAGTTTCAGACTATCCTCCCAACCCAAGAGAAGCTTTTAAATTTAGAGAATCCTCTCGCCATCC
471	AAATGTTAGATCCACTAGTTTCTCTCTTTATCTTATACTATCTTTTGCAA	CCACAAAGGGCCGAGTTAAG	AGAGAATCCTCTCGCCATCC	CCACAAAGGGCCGAGTTAAGAAATGTTAGATCCACTAGTTTCTCTCTTTATCTTATACTATCTTTTGCAAAGAGAATCCTCTCGCCATCC
472	ACAGAAAATTTAACGTGGGGTTGAGTTCAAGAAGACAGATTACATATGAT	CCACAAAGGGCCGAGTTAAG	AGAGAATCCTCTCGCCATCC	CCACAAAGGGCCGAGTTAAGACAGAAAATTTAACGTGGGGTTGAGTTCAAGAAGACAGATTACATATGATAGAGAATCCTCTCGCCATCC
473	TCTTCTATTTATAGACGAAGGAGTAATCAAAACGATAAATAATCATTATT	CCACAAAGGGCCGAGTTAAG	AGAGAATCCTCTCGCCATCC	CCACAAAGGGCCGAGTTAAGTCTTCTATTTATAGACGAAGGAGTAATCAAAACGATAAATAATCATTATTAGAGAATCCTCTCGCCATCC
474	ATTTAACAAATAATGAACAATCTATTTAAGTGCCTTATTCAAAATTAATG	CCACAAAGGGCCGAGTTAAG	AGAGAATCCTCTCGCCATCC	CCACAAAGGGCCGAGTTAAGATTTAACAAATAATGAACAATCTATTTAAGTGCCTTATTCAAAATTAATGAGAGAATCCTCTCGCCATCC
475	ATTAATACTAATACTCCCTTACTCTTTAATTTCGTTACTACACTTTTATT	CCACAAAGGGCCGAGTTAAG	AGAGAATCCTCTCGCCATCC	CCACAAAGGGCCGAGTTAAGATTAATACTAATACTCCCTTACTCTTTAATTTCGTTACTACACTTTTATTAGAGAATCCTCTCGCCATCC
476	AGTCCAGTAGTCCGGAGAAACTGCTGTTAGACTACCAAAGATTGTACTAA	CCACAAAGGGCCGAGTTAAG	AGAGAATCCTCTCGCCATCC	CCACAAAGGGCCGAGTTAAGAGTCCAGTAGTCCGGAGAAACTGCTGTTAGACTACCAAAGATTGTACTAAAGAGAATCCTCTCGCCATCC
477	AAACACACCCATAATGCCGCAAATAGTTTGGACCACCTTCAACGATTCGT	CCACAAAGGGCCGAGTTAAG	AGAGAATCCTCTCGCCATCC	CCACAAAGGGCCGAGTTAAGAAACACACCCATAATGCCGCAAATAGTTTGGACCACCTTCAACGATTCGTAGAGAATCCTCTCGCCATCC
478	AACTCGTCGTCTCGTAGTTAAATTGTATGGTAAAATATTACAAATGATGA	CCACAAAGGGCCGAGTTAAG	AGAGAATCCTCTCGCCATCC	CCACAAAGGGCCGAGTTAAGAACTCGTCGTCTCGTAGTTAAATTGTATGGTAAAATATTACAAATGATGAAGAGAATCCTCTCGCCATCC
479	TTGTTAGTTGGGCTGCATAATTTTCATTAATAATTCGTTACTTTGTTCAA	CCACAAAGGGCCGAGTTAAG	AGAGAATCCTCTCGCCATCC	CCACAAAGGGCCGAGTTAAGTTGTTAGTTGGGCTGCATAATTTTCATTAATAATTCGTTACTTTGTTCAAAGAGAATCCTCTCGCCATCC
480	TAATTTGAAAATTTGTTATTGGAATTGAATTGTCTCTCCTTACTATATTT	CCACAAAGGGCCGAGTTAAG	AGAGAATCCTCTCGCCATCC	CCACAAAGGGCCGAGTTAAGTAATTTGAAAATTTGTTATTGGAATTGAATTGTCTCTCCTTACTATATTTAGAGAATCCTCTCGCCATCC
481	AAAAGGCAAGAGATGGACTAAAATGGCATAAAGATTAAGGACTATATTGG	CCACAAAGGGCCGAGTTAAG	AGAGAATCCTCTCGCCATCC	CCACAAAGGGCCGAGTTAAGAAAAGGCAAGAGATGGACTAAAATGGCATAAAGATTAAGGACTATATTGGAGAGAATCCTCTCGCCATCC
482	AAGACGTTACTTCAAATAGATAAATCCTAACAAATTATTTTCCCAACCCA	CCACAAAGGGCCGAGTTAAG	AGAGAATCCTCTCGCCATCC	CCACAAAGGGCCGAGTTAAGAAGACGTTACTTCAAATAGATAAATCCTAACAAATTATTTTCCCAACCCAAGAGAATCCTCTCGCCATCC
483	TTTTAACTTATATATCACAGCTTTCTTTGACCATTTGTAATTTGGGAGTA	CCACAAAGGGCCGAGTTAAG	AGAGAATCCTCTCGCCATCC	CCACAAAGGGCCGAGTTAAGTTTTAACTTATATATCACAGCTTTCTTTGACCATTTGTAATTTGGGAGTAAGAGAATCCTCTCGCCATCC
484	GGTGTCTTATCAGAGGGAAGATGAACGAAGCCATGACTATAATGCAAAAG	CCACAAAGGGCCGAGTTAAG	AGAGAATCCTCTCGCCATCC	CCACAAAGGGCCGAGTTAAGGGTGTCTTATCAGAGGGAAGATGAACGAAGCCATGACTATAATGCAAAAGAGAGAATCCTCTCGCCATCC
485	CGGGACATTTCATCATGTTACAACAAAATATGTATATAATTACCGTCACG	CCACAAAGGGCCGAGTTAAG	AGAGAATCCTCTCGCCATCC	CCACAAAGGGCCGAGTTAAGCGGGACATTTCATCATGTTACAACAAAATATGTATATAATTACCGTCACGAGAGAATCCTCTCGCCATCC
486	TCTTCTAGGAATTTTCAGCATATATGTGGTCGAGAAGGTACATAAAAGAT	CCACAAAGGGCCGAGTTAAG	AGAGAATCCTCTCGCCATCC	CCACAAAGGGCCGAGTTAAGTCTTCTAGGAATTTTCAGCATATATGTGGTCGAGAAGGTACATAAAAGATAGAGAATCCTCTCGCCATCC
487	ATTATAGAGAGGTTTGGAATATCTTAGACAAGCGACTTGGGCATCTACCT	CCACAAAGGGCCGAGTTAAG	AGAGAATCCTCTCGCCATCC	CCACAAAGGGCCGAGTTAAGATTATAGAGAGGTTTGGAATATCTTAGACAAGCGACTTGGGCATCTACCTAGAGAATCCTCTCGCCATCC
488	AGATGATGATGAACCACAACACGACACGAGTTCTAACAGAAACTTCATAC	CCACAAAGGGCCGAGTTAAG	AGAGAATCCTCTCGCCATCC	CCACAAAGGGCCGAGTTAAGAGATGATGATGAACCACAACACGACACGAGTTCTAACAGAAACTTCATACAGAGAATCCTCTCGCCATCC
489	TGAATTACAAATAATTTCATTAGAAGTAGGTATGGTCTATTTATGAACCA	CCACAAAGGGCCGAGTTAAG	AGAGAATCCTCTCGCCATCC	CCACAAAGGGCCGAGTTAAGTGAATTACAAATAATTTCATTAGAAGTAGGTATGGTCTATTTATGAACCAAGAGAATCCTCTCGCCATCC
490	ACTTTATGTAAGAAGTTAAGATTGTTGTGTTTCCATGTGCAAATGATTTG	CCACAAAGGGCCGAGTTAAG	AGAGAATCCTCTCGCCATCC	CCACAAAGGGCCGAGTTAAGACTTTATGTAAGAAGTTAAGATTGTTGTGTTTCCATGTGCAAATGATTTGAGAGAATCCTCTCGCCATCC
491	CCATTACTCTTTCTGTAGCATAGGGAAATTTATTAAAGCTTAATTGGCAA	CCACAAAGGGCCGAGTTAAG	AGAGAATCCTCTCGCCATCC	CCACAAAGGGCCGAGTTAAGCCATTACTCTTTCTGTAGCATAGGGAAATTTATTAAAGCTTAATTGGCAAAGAGAATCCTCTCGCCATCC
492	AAGCCTGTCTAAGTCCGTCTGTTGTTGTTCGCTTGCTAAGGCCTGAAAGT	CCACAAAGGGCCGAGTTAAG	AGAGAATCCTCTCGCCATCC	CCACAAAGGGCCGAGTTAAGAAGCCTGTCTAAGTCCGTCTGTTGTTGTTCGCTTGCTAAGGCCTGAAAGTAGAGAATCCTCTCGCCATCC
493	TTCCAAAACTAGAAATCAATAACCAACAACACAATTATGAAAGACTCCGA	CCACAAAGGGCCGAGTTAAG	AGAGAATCCTCTCGCCATCC	CCACAAAGGGCCGAGTTAAGTTCCAAAACTAGAAATCAATAACCAACAACACAATTATGAAAGACTCCGAAGAGAATCCTCTCGCCATCC
494	TTCTACAGAAAAGTTATAAAATTTTAAAGCCGAGAAAGTTGCTCCCTTTT	CCACAAAGGGCCGAGTTAAG	AGAGAATCCTCTCGCCATCC	CCACAAAGGGCCGAGTTAAGTTCTACAGAAAAGTTATAAAATTTTAAAGCCGAGAAAGTTGCTCCCTTTTAGAGAATCCTCTCGCCATCC
495	AAAACTTACACCACAACTGTAACTTCTTAGAAATAAAATAGTTTCAATAA	CCACAAAGGGCCGAGTTAAG	AGAGAATCCTCTCGCCATCC	CCACAAAGGGCCGAGTTAAGAAAACTTACACCACAACTGTAACTTCTTAGAAATAAAATAGTTTCAATAAAGAGAATCCTCTCGCCATCC
496	AGTTAAAGATTTTGGAAGCGAACAATACTGTAGTACTAAATTTTGTTTGG	CCACAAAGGGCCGAGTTAAG	AGAGAATCCTCTCGCCATCC	CCACAAAGGGCCGAGTTAAGAGTTAAAGATTTTGGAAGCGAACAATACTGTAGTACTAAATTTTGTTTGGAGAGAATCCTCTCGCCATCC
497	ATACAGCTTTTCACAGTCAATGATAACAATATTATTAAATTCTAGGAAGC	CCACAAAGGGCCGAGTTAAG	AGAGAATCCTCTCGCCATCC	CCACAAAGGGCCGAGTTAAGATACAGCTTTTCACAGTCAATGATAACAATATTATTAAATTCTAGGAAGCAGAGAATCCTCTCGCCATCC
498	TGTTAGGGCTGTATTGTAATGAAATTCCGTAAAACTTTTCTTTCTTCAAA	CCACAAAGGGCCGAGTTAAG	AGAGAATCCTCTCGCCATCC	CCACAAAGGGCCGAGTTAAGTGTTAGGGCTGTATTGTAATGAAATTCCGTAAAACTTTTCTTTCTTCAAAAGAGAATCCTCTCGCCATCC
499	AAAGAAGATTCTTGGGATATGATTCTGCTTGCATGCTGAAGAAGTAGACT	CCACAAAGGGCCGAGTTAAG	AGAGAATCCTCTCGCCATCC	CCACAAAGGGCCGAGTTAAGAAAGAAGATTCTTGGGATATGATTCTGCTTGCATGCTGAAGAAGTAGACTAGAGAATCCTCTCGCCATCC
500	AGAAGGTCAAGAAAATGTTGGTGGTGTCATTGATTTTGAAGATATAGAAT	CCACAAAGGGCCGAGTTAAG	AGAGAATCCTCTCGCCATCC	CCACAAAGGGCCGAGTTAAGAGAAGGTCAAGAAAATGTTGGTGGTGTCATTGATTTTGAAGATATAGAATAGAGAATCCTCTCGCCATCC
501	GCACAGATTTCCATACCTTTGACCATAGTTCAAAATATCATTGCCCATAC	CCACAAAGGGCCGAGTTAAG	AGAGAATCCTCTCGCCATCC	CCACAAAGGGCCGAGTTAAGGCACAGATTTCCATACCTTTGACCATAGTTCAAAATATCATTGCCCATACAGAGAATCCTCTCGCCATCC
502	GTGATAGAAAGTCCAGATATGAACATAAGCCTTAGAGAAATATTGAATTA	CCACAAAGGGCCGAGTTAAG	AGAGAATCCTCTCGCCATCC	CCACAAAGGGCCGAGTTAAGGTGATAGAAAGTCCAGATATGAACATAAGCCTTAGAGAAATATTGAATTAAGAGAATCCTCTCGCCATCC
503	TGTGGCTAATAAAACTCCATATATTAATACTGTCTCTACTATTGTTTTGG	CCACAAAGGGCCGAGTTAAG	AGAGAATCCTCTCGCCATCC	CCACAAAGGGCCGAGTTAAGTGTGGCTAATAAAACTCCATATATTAATACTGTCTCTACTATTGTTTTGGAGAGAATCCTCTCGCCATCC
504	AAGAATGAATGAGTTCGATTAATTTATTTGTTTATCTTAAGGTATCATTA	CCACAAAGGGCCGAGTTAAG	AGAGAATCCTCTCGCCATCC	CCACAAAGGGCCGAGTTAAGAAGAATGAATGAGTTCGATTAATTTATTTGTTTATCTTAAGGTATCATTAAGAGAATCCTCTCGCCATCC
505	TTGGTAGAAGTTAGTCGAAGAAGGGGAGAGAGGTTGGAAGTTAAAGCTTA	CCACAAAGGGCCGAGTTAAG	AGAGAATCCTCTCGCCATCC	CCACAAAGGGCCGAGTTAAGTTGGTAGAAGTTAGTCGAAGAAGGGGAGAGAGGTTGGAAGTTAAAGCTTAAGAGAATCCTCTCGCCATCC
506	ATATATATGATGAAATTACAATTATAAACCTGGTAACTTTATGAAGGTAT	CCACAAAGGGCCGAGTTAAG	AGAGAATCCTCTCGCCATCC	CCACAAAGGGCCGAGTTAAGATATATATGATGAAATTACAATTATAAACCTGGTAACTTTATGAAGGTATAGAGAATCCTCTCGCCATCC
507	CATCGATTTAAGGTCATCTTTTCTCAGCATAAGTAACTTTCATTAGTTTT	CCACAAAGGGCCGAGTTAAG	AGAGAATCCTCTCGCCATCC	CCACAAAGGGCCGAGTTAAGCATCGATTTAAGGTCATCTTTTCTCAGCATAAGTAACTTTCATTAGTTTTAGAGAATCCTCTCGCCATCC
508	AATTAAAATATTAAAATGGCACTTTAGTCAATTAATTATTTCCTTATCAG	CCACAAAGGGCCGAGTTAAG	AGAGAATCCTCTCGCCATCC	CCACAAAGGGCCGAGTTAAGAATTAAAATATTAAAATGGCACTTTAGTCAATTAATTATTTCCTTATCAGAGAGAATCCTCTCGCCATCC
509	CTAAGGAACCTCTGAGGAATTGTGATACATTAGGACTGATCTTTGGCAGT	CCACAAAGGGCCGAGTTAAG	AGAGAATCCTCTCGCCATCC	CCACAAAGGGCCGAGTTAAGCTAAGGAACCTCTGAGGAATTGTGATACATTAGGACTGATCTTTGGCAGTAGAGAATCCTCTCGCCATCC
510	TTTTCATTTCAATTCTAGCACGCAGGCATGGAAAAGCTATTGGGGAAAGT	CCACAAAGGGCCGAGTTAAG	AGAGAATCCTCTCGCCATCC	CCACAAAGGGCCGAGTTAAGTTTTCATTTCAATTCTAGCACGCAGGCATGGAAAAGCTATTGGGGAAAGTAGAGAATCCTCTCGCCATCC
511	TAACCCCTCACATCACATTTATCTTCCCTGCAATTAAATTAATCAATCAA	CCACAAAGGGCCGAGTTAAG	AGAGAATCCTCTCGCCATCC	CCACAAAGGGCCGAGTTAAGTAACCCCTCACATCACATTTATCTTCCCTGCAATTAAATTAATCAATCAAAGAGAATCCTCTCGCCATCC
512	ATCATAAGATTTATTGAAGATAGTAAGAAAGAAAATATTCATTTCAAACT	CCACAAAGGGCCGAGTTAAG	AGAGAATCCTCTCGCCATCC	CCACAAAGGGCCGAGTTAAGATCATAAGATTTATTGAAGATAGTAAGAAAGAAAATATTCATTTCAAACTAGAGAATCCTCTCGCCATCC
513	AATTGAAGCTATCAGATGTCACAAACAAGTCATATCCTTTGGCTTATATT	CCACAAAGGGCCGAGTTAAG	AGAGAATCCTCTCGCCATCC	CCACAAAGGGCCGAGTTAAGAATTGAAGCTATCAGATGTCACAAACAAGTCATATCCTTTGGCTTATATTAGAGAATCCTCTCGCCATCC
514	AAATTTACATTTCCTGCAAAACTCTTGTGTGGAGATTGTTATGAGGTATG	CCACAAAGGGCCGAGTTAAG	AGAGAATCCTCTCGCCATCC	CCACAAAGGGCCGAGTTAAGAAATTTACATTTCCTGCAAAACTCTTGTGTGGAGATTGTTATGAGGTATGAGAGAATCCTCTCGCCATCC
515	TTCTTCAATAAAATATGGACTACAAGGGATAACACAGGTACAACAGGCAA	CCACAAAGGGCCGAGTTAAG	AGAGAATCCTCTCGCCATCC	CCACAAAGGGCCGAGTTAAGTTCTTCAATAAAATATGGACTACAAGGGATAACACAGGTACAACAGGCAAAGAGAATCCTCTCGCCATCC
516	GTTACAGTATTAAGATCCTGAACTTCTTCTAAATTTGCAGTTTGCCTTGC	CCACAAAGGGCCGAGTTAAG	AGAGAATCCTCTCGCCATCC	CCACAAAGGGCCGAGTTAAGGTTACAGTATTAAGATCCTGAACTTCTTCTAAATTTGCAGTTTGCCTTGCAGAGAATCCTCTCGCCATCC
517	TGATCAAGGCATAGAACTATAGAAAATAAATAACAAACTTGATTGCAATG	CCACAAAGGGCCGAGTTAAG	AGAGAATCCTCTCGCCATCC	CCACAAAGGGCCGAGTTAAGTGATCAAGGCATAGAACTATAGAAAATAAATAACAAACTTGATTGCAATGAGAGAATCCTCTCGCCATCC
518	TACTTGTATCTGGCATTTGTTTTAAGAAAGGTAGATCACATACACTCACT	CCACAAAGGGCCGAGTTAAG	AGAGAATCCTCTCGCCATCC	CCACAAAGGGCCGAGTTAAGTACTTGTATCTGGCATTTGTTTTAAGAAAGGTAGATCACATACACTCACTAGAGAATCCTCTCGCCATCC
519	GCTGTCATTCCTTCTTTTAACAAAATTGATTGATCACCAACTTGAATCTG	CCACAAAGGGCCGAGTTAAG	AGAGAATCCTCTCGCCATCC	CCACAAAGGGCCGAGTTAAGGCTGTCATTCCTTCTTTTAACAAAATTGATTGATCACCAACTTGAATCTGAGAGAATCCTCTCGCCATCC
520	GCATATCTCATTGTAAAATTTTATTTTCAGCAAACTTAAATAATAGAGTT	CCACAAAGGGCCGAGTTAAG	AGAGAATCCTCTCGCCATCC	CCACAAAGGGCCGAGTTAAGGCATATCTCATTGTAAAATTTTATTTTCAGCAAACTTAAATAATAGAGTTAGAGAATCCTCTCGCCATCC
521	TACCAATACTATATTGATGCACAAGATCCCATTACAATTATTATATTATT	CCACAAAGGGCCGAGTTAAG	AGAGAATCCTCTCGCCATCC	CCACAAAGGGCCGAGTTAAGTACCAATACTATATTGATGCACAAGATCCCATTACAATTATTATATTATTAGAGAATCCTCTCGCCATCC
522	TATATATTAATGAATAAAGTGGATTTCACAATAATAATGCAAAGTTAAAT	CCACAAAGGGCCGAGTTAAG	AGAGAATCCTCTCGCCATCC	CCACAAAGGGCCGAGTTAAGTATATATTAATGAATAAAGTGGATTTCACAATAATAATGCAAAGTTAAATAGAGAATCCTCTCGCCATCC
523	ATAAAATTGTCTAGCATTCACTATATATAGGAATTTCTCTTCAGGTGATT	CCACAAAGGGCCGAGTTAAG	AGAGAATCCTCTCGCCATCC	CCACAAAGGGCCGAGTTAAGATAAAATTGTCTAGCATTCACTATATATAGGAATTTCTCTTCAGGTGATTAGAGAATCCTCTCGCCATCC
524	TCTTATGATATCGAAGTCAATATAAACCATTCCAAATTGTGATTGCTTAA	CCACAAAGGGCCGAGTTAAG	AGAGAATCCTCTCGCCATCC	CCACAAAGGGCCGAGTTAAGTCTTATGATATCGAAGTCAATATAAACCATTCCAAATTGTGATTGCTTAAAGAGAATCCTCTCGCCATCC
525	AATAAATTTTGATTTTAAATTGTTGTAAATACAAGTATAGATTCCATGTG	CCACAAAGGGCCGAGTTAAG	AGAGAATCCTCTCGCCATCC	CCACAAAGGGCCGAGTTAAGAATAAATTTTGATTTTAAATTGTTGTAAATACAAGTATAGATTCCATGTGAGAGAATCCTCTCGCCATCC
526	CATTAGCGTCTGAAAACCAAATACGAAAGAAAATTTATTATTATAGCTTC	CCACAAAGGGCCGAGTTAAG	AGAGAATCCTCTCGCCATCC	CCACAAAGGGCCGAGTTAAGCATTAGCGTCTGAAAACCAAATACGAAAGAAAATTTATTATTATAGCTTCAGAGAATCCTCTCGCCATCC
527	CAATGATAAAAGGTCTAGTAATTGAACTAAAGAAAATCCATGTGTAACCC	CCACAAAGGGCCGAGTTAAG	AGAGAATCCTCTCGCCATCC	CCACAAAGGGCCGAGTTAAGCAATGATAAAAGGTCTAGTAATTGAACTAAAGAAAATCCATGTGTAACCCAGAGAATCCTCTCGCCATCC
528	CGAGTACAGAAACTTCACTGGAAAAGGAACTTGTAGAACTACTTTCGGAA	CCACAAAGGGCCGAGTTAAG	AGAGAATCCTCTCGCCATCC	CCACAAAGGGCCGAGTTAAGCGAGTACAGAAACTTCACTGGAAAAGGAACTTGTAGAACTACTTTCGGAAAGAGAATCCTCTCGCCATCC
529	TCTCATTTGGTAAGATTTTGCTATGGAACTTATTATCAAGATGCACTTCA	CCACAAAGGGCCGAGTTAAG	AGAGAATCCTCTCGCCATCC	CCACAAAGGGCCGAGTTAAGTCTCATTTGGTAAGATTTTGCTATGGAACTTATTATCAAGATGCACTTCAAGAGAATCCTCTCGCCATCC
530	CCTATAGGGTCCTGCATTTGTGACTACTCTGGTTATAGAAATTATATTCT	CCACAAAGGGCCGAGTTAAG	AGAGAATCCTCTCGCCATCC	CCACAAAGGGCCGAGTTAAGCCTATAGGGTCCTGCATTTGTGACTACTCTGGTTATAGAAATTATATTCTAGAGAATCCTCTCGCCATCC
531	TTACTAGATAAGTGGAAATGATGAGTAGGAGATAGGATCTTCATGTAAAC	CCACAAAGGGCCGAGTTAAG	AGAGAATCCTCTCGCCATCC	CCACAAAGGGCCGAGTTAAGTTACTAGATAAGTGGAAATGATGAGTAGGAGATAGGATCTTCATGTAAACAGAGAATCCTCTCGCCATCC
532	GTTAGCCATGATTTTCCAACTATTGCTCTGGTACCAAGCTAAAGAGAAGA	CCACAAAGGGCCGAGTTAAG	AGAGAATCCTCTCGCCATCC	CCACAAAGGGCCGAGTTAAGGTTAGCCATGATTTTCCAACTATTGCTCTGGTACCAAGCTAAAGAGAAGAAGAGAATCCTCTCGCCATCC
533	GAGAAATCTGAGCATTACAACATTCCCAAATAAGTTTTACTATATCTACT	CCACAAAGGGCCGAGTTAAG	AGAGAATCCTCTCGCCATCC	CCACAAAGGGCCGAGTTAAGGAGAAATCTGAGCATTACAACATTCCCAAATAAGTTTTACTATATCTACTAGAGAATCCTCTCGCCATCC
534	TACTACTGGGTATACAAGATTTCTGAACTACTACAGCTAAGCCTTCCCTT	CCACAAAGGGCCGAGTTAAG	AGAGAATCCTCTCGCCATCC	CCACAAAGGGCCGAGTTAAGTACTACTGGGTATACAAGATTTCTGAACTACTACAGCTAAGCCTTCCCTTAGAGAATCCTCTCGCCATCC
535	GATATGATTGCACATCCAGGTTAGTTGACATTGAACGGGGAACAGAGACT	CCACAAAGGGCCGAGTTAAG	AGAGAATCCTCTCGCCATCC	CCACAAAGGGCCGAGTTAAGGATATGATTGCACATCCAGGTTAGTTGACATTGAACGGGGAACAGAGACTAGAGAATCCTCTCGCCATCC
536	AGAATGTTATGATCCGACACTTACTTTTCTTACAATTGGAAGACAGTAAA	CCACAAAGGGCCGAGTTAAG	AGAGAATCCTCTCGCCATCC	CCACAAAGGGCCGAGTTAAGAGAATGTTATGATCCGACACTTACTTTTCTTACAATTGGAAGACAGTAAAAGAGAATCCTCTCGCCATCC
537	CCTCTAATCATAGCATATGTGGAAATTCAGTGAAGGGTTTGGGAGGAGAG	CCACAAAGGGCCGAGTTAAG	AGAGAATCCTCTCGCCATCC	CCACAAAGGGCCGAGTTAAGCCTCTAATCATAGCATATGTGGAAATTCAGTGAAGGGTTTGGGAGGAGAGAGAGAATCCTCTCGCCATCC
538	TATTATTATTTAGTAATTTTCTAGAATAACGAATGTAATTAATTATTAAT	CCACAAAGGGCCGAGTTAAG	AGAGAATCCTCTCGCCATCC	CCACAAAGGGCCGAGTTAAGTATTATTATTTAGTAATTTTCTAGAATAACGAATGTAATTAATTATTAATAGAGAATCCTCTCGCCATCC
539	AATAATTGTATCTTCTTAATAGTACACATAAATAGTAAAATTCATTATCT	CCACAAAGGGCCGAGTTAAG	AGAGAATCCTCTCGCCATCC	CCACAAAGGGCCGAGTTAAGAATAATTGTATCTTCTTAATAGTACACATAAATAGTAAAATTCATTATCTAGAGAATCCTCTCGCCATCC
540	ATCTTGCACAAAGTTTATCTGGAGGGGAATATCTTTAGAATGACCCTCGC	CCACAAAGGGCCGAGTTAAG	AGAGAATCCTCTCGCCATCC	CCACAAAGGGCCGAGTTAAGATCTTGCACAAAGTTTATCTGGAGGGGAATATCTTTAGAATGACCCTCGCAGAGAATCCTCTCGCCATCC
541	TCATATTTATTTAACATTTAATGATTCCAACTATTAGTACTATTTAAATA	CCACAAAGGGCCGAGTTAAG	AGAGAATCCTCTCGCCATCC	CCACAAAGGGCCGAGTTAAGTCATATTTATTTAACATTTAATGATTCCAACTATTAGTACTATTTAAATAAGAGAATCCTCTCGCCATCC
542	ACCAAATGACATGATATTGTAGAGCATTAAAATGAGTTTGTCGATCACTT	CCACAAAGGGCCGAGTTAAG	AGAGAATCCTCTCGCCATCC	CCACAAAGGGCCGAGTTAAGACCAAATGACATGATATTGTAGAGCATTAAAATGAGTTTGTCGATCACTTAGAGAATCCTCTCGCCATCC
543	TATTTGGACAATAAATTTTGGGACAAGACTTTCACATTTTACCTGGAAAT	CCACAAAGGGCCGAGTTAAG	AGAGAATCCTCTCGCCATCC	CCACAAAGGGCCGAGTTAAGTATTTGGACAATAAATTTTGGGACAAGACTTTCACATTTTACCTGGAAATAGAGAATCCTCTCGCCATCC
544	GTCCCTAATCATATATGTTTCCTTTCATGTATGGCAAAGAGAAAGATAAA	CCACAAAGGGCCGAGTTAAG	AGAGAATCCTCTCGCCATCC	CCACAAAGGGCCGAGTTAAGGTCCCTAATCATATATGTTTCCTTTCATGTATGGCAAAGAGAAAGATAAAAGAGAATCCTCTCGCCATCC
545	CAATATTTTGTGTATTCAATAAAAGTTTCTAATTATAGAGTTGAAAAGGA	CCACAAAGGGCCGAGTTAAG	AGAGAATCCTCTCGCCATCC	CCACAAAGGGCCGAGTTAAGCAATATTTTGTGTATTCAATAAAAGTTTCTAATTATAGAGTTGAAAAGGAAGAGAATCCTCTCGCCATCC
546	AAGAAGATATGTATTTCTCTGGTAAAAGATGTATATTTCTGGAAAGGAAA	CCACAAAGGGCCGAGTTAAG	AGAGAATCCTCTCGCCATCC	CCACAAAGGGCCGAGTTAAGAAGAAGATATGTATTTCTCTGGTAAAAGATGTATATTTCTGGAAAGGAAAAGAGAATCCTCTCGCCATCC
547	TTGAGCTCAGGTTTTCATCGCACAAATTCAAATTATACAATTCAAGACGT	CCACAAAGGGCCGAGTTAAG	AGAGAATCCTCTCGCCATCC	CCACAAAGGGCCGAGTTAAGTTGAGCTCAGGTTTTCATCGCACAAATTCAAATTATACAATTCAAGACGTAGAGAATCCTCTCGCCATCC
548	AAGTGCAAATAATTAAGGAAGTGATCTTGATTCTACTTGTAGGAATTTGG	CCACAAAGGGCCGAGTTAAG	AGAGAATCCTCTCGCCATCC	CCACAAAGGGCCGAGTTAAGAAGTGCAAATAATTAAGGAAGTGATCTTGATTCTACTTGTAGGAATTTGGAGAGAATCCTCTCGCCATCC
549	TAGGGATAGATGACAGTTTATGATGGAGGAAGAGGAGTTAGATAAGAAAG	CCACAAAGGGCCGAGTTAAG	AGAGAATCCTCTCGCCATCC	CCACAAAGGGCCGAGTTAAGTAGGGATAGATGACAGTTTATGATGGAGGAAGAGGAGTTAGATAAGAAAGAGAGAATCCTCTCGCCATCC
550	CTCTCTTTTGGACCTCATCAGCGTTACCAGTGACATCTTCAATAAACTGA	CCACAAAGGGCCGAGTTAAG	AGAGAATCCTCTCGCCATCC	CCACAAAGGGCCGAGTTAAGCTCTCTTTTGGACCTCATCAGCGTTACCAGTGACATCTTCAATAAACTGAAGAGAATCCTCTCGCCATCC
551	GCAGTGACCCATCTCTTACCTTTTGATGCACAACTCACCGAGTACACCAG	CCACAAAGGGCCGAGTTAAG	AGAGAATCCTCTCGCCATCC	CCACAAAGGGCCGAGTTAAGGCAGTGACCCATCTCTTACCTTTTGATGCACAACTCACCGAGTACACCAGAGAGAATCCTCTCGCCATCC
552	GTTTCAAATCAATTTCAGTTGATGTTGTTGGTCCATTGCTTATGACCGGG	CCACAAAGGGCCGAGTTAAG	AGAGAATCCTCTCGCCATCC	CCACAAAGGGCCGAGTTAAGGTTTCAAATCAATTTCAGTTGATGTTGTTGGTCCATTGCTTATGACCGGGAGAGAATCCTCTCGCCATCC
553	ATGTATGGATGGAAGGATAGATATTCTCAGTTTGTGTAGCATCTTTGAAG	CCACAAAGGGCCGAGTTAAG	AGAGAATCCTCTCGCCATCC	CCACAAAGGGCCGAGTTAAGATGTATGGATGGAAGGATAGATATTCTCAGTTTGTGTAGCATCTTTGAAGAGAGAATCCTCTCGCCATCC
554	TGAGTTATGATTGATTACAAGGTAATTGGGAAAAGATTTGGAGCTTTGTG	CCACAAAGGGCCGAGTTAAG	AGAGAATCCTCTCGCCATCC	CCACAAAGGGCCGAGTTAAGTGAGTTATGATTGATTACAAGGTAATTGGGAAAAGATTTGGAGCTTTGTGAGAGAATCCTCTCGCCATCC
555	AAGATCTCTCACTTAGAAAATCAAAATCAGATAGAGACAGACAATTAAAA	CCACAAAGGGCCGAGTTAAG	AGAGAATCCTCTCGCCATCC	CCACAAAGGGCCGAGTTAAGAAGATCTCTCACTTAGAAAATCAAAATCAGATAGAGACAGACAATTAAAAAGAGAATCCTCTCGCCATCC
556	CCTTCAAATAACTGTGCTCCCGGAAATCATATCTTAATTAATGTTATTTT	CCACAAAGGGCCGAGTTAAG	AGAGAATCCTCTCGCCATCC	CCACAAAGGGCCGAGTTAAGCCTTCAAATAACTGTGCTCCCGGAAATCATATCTTAATTAATGTTATTTTAGAGAATCCTCTCGCCATCC
557	CCATTCATCTAACATTTCACGTGATTTATTCAATTTCCTTTGGCCATTTT	CCACAAAGGGCCGAGTTAAG	AGAGAATCCTCTCGCCATCC	CCACAAAGGGCCGAGTTAAGCCATTCATCTAACATTTCACGTGATTTATTCAATTTCCTTTGGCCATTTTAGAGAATCCTCTCGCCATCC
558	AAACCTGTTGTGGGATTCAATTGCAGTCTCCAAAATATGAGGTGAGCTGG	CCACAAAGGGCCGAGTTAAG	AGAGAATCCTCTCGCCATCC	CCACAAAGGGCCGAGTTAAGAAACCTGTTGTGGGATTCAATTGCAGTCTCCAAAATATGAGGTGAGCTGGAGAGAATCCTCTCGCCATCC
559	CCACCCAGAGTCAAACAAAGGTGATTTCCTAGTCATTCCCCAAGCTTGAC	CCACAAAGGGCCGAGTTAAG	AGAGAATCCTCTCGCCATCC	CCACAAAGGGCCGAGTTAAGCCACCCAGAGTCAAACAAAGGTGATTTCCTAGTCATTCCCCAAGCTTGACAGAGAATCCTCTCGCCATCC
560	AGTTTAAATAATGTTTCTGTGATTATTATAGTATAGGACACATAATATAG	CCACAAAGGGCCGAGTTAAG	AGAGAATCCTCTCGCCATCC	CCACAAAGGGCCGAGTTAAGAGTTTAAATAATGTTTCTGTGATTATTATAGTATAGGACACATAATATAGAGAGAATCCTCTCGCCATCC
561	TTCTTCTGTTAGATCTCTTGGCCAGTATTCATTTTCAGAGGCTGCAATTT	CCACAAAGGGCCGAGTTAAG	AGAGAATCCTCTCGCCATCC	CCACAAAGGGCCGAGTTAAGTTCTTCTGTTAGATCTCTTGGCCAGTATTCATTTTCAGAGGCTGCAATTTAGAGAATCCTCTCGCCATCC
562	CAAAAGGTACAATTCATAGGTCTAGTACACAATACTTAATAAAAGAATGA	CCACAAAGGGCCGAGTTAAG	AGAGAATCCTCTCGCCATCC	CCACAAAGGGCCGAGTTAAGCAAAAGGTACAATTCATAGGTCTAGTACACAATACTTAATAAAAGAATGAAGAGAATCCTCTCGCCATCC
563	AAATGAGAATGGAATAAGTCATTTTGGTCCTACATATGATTTTCTTTCTT	CCACAAAGGGCCGAGTTAAG	AGAGAATCCTCTCGCCATCC	CCACAAAGGGCCGAGTTAAGAAATGAGAATGGAATAAGTCATTTTGGTCCTACATATGATTTTCTTTCTTAGAGAATCCTCTCGCCATCC
564	TTAGAGTGTTTCTGCAGAATTGGTGAGATGAATTAAGAAGGGGAAAAGGG	CCACAAAGGGCCGAGTTAAG	AGAGAATCCTCTCGCCATCC	CCACAAAGGGCCGAGTTAAGTTAGAGTGTTTCTGCAGAATTGGTGAGATGAATTAAGAAGGGGAAAAGGGAGAGAATCCTCTCGCCATCC
565	TACATCCCATTATGAGATCTGTTAACCTATAAATCCATATATTTGTCTTT	CCACAAAGGGCCGAGTTAAG	AGAGAATCCTCTCGCCATCC	CCACAAAGGGCCGAGTTAAGTACATCCCATTATGAGATCTGTTAACCTATAAATCCATATATTTGTCTTTAGAGAATCCTCTCGCCATCC
566	TATATATATAAGCTTAATTGTATCTCTTCAAAATAGTCACATAGATTCCT	CCACAAAGGGCCGAGTTAAG	AGAGAATCCTCTCGCCATCC	CCACAAAGGGCCGAGTTAAGTATATATATAAGCTTAATTGTATCTCTTCAAAATAGTCACATAGATTCCTAGAGAATCCTCTCGCCATCC
567	TTAAAACACACACGAGAACAGAAAAGGGTTTTGCTTTGGTGGTAAGGTAA	CCACAAAGGGCCGAGTTAAG	AGAGAATCCTCTCGCCATCC	CCACAAAGGGCCGAGTTAAGTTAAAACACACACGAGAACAGAAAAGGGTTTTGCTTTGGTGGTAAGGTAAAGAGAATCCTCTCGCCATCC
568	CATTCCGAGACCTTTTATTTGATGCTTCTGTATTGGTACTGCTTTTCTTT	CCACAAAGGGCCGAGTTAAG	AGAGAATCCTCTCGCCATCC	CCACAAAGGGCCGAGTTAAGCATTCCGAGACCTTTTATTTGATGCTTCTGTATTGGTACTGCTTTTCTTTAGAGAATCCTCTCGCCATCC
569	ATTTCAGATTCCTCATGAGAAATCTAATAATAAAGATCCAGAAGGACCTA	CCACAAAGGGCCGAGTTAAG	AGAGAATCCTCTCGCCATCC	CCACAAAGGGCCGAGTTAAGATTTCAGATTCCTCATGAGAAATCTAATAATAAAGATCCAGAAGGACCTAAGAGAATCCTCTCGCCATCC
570	AAGGAGGGGCATCTATGTATCTATTCAATGATAATAATTATTCTTGTCAA	CCACAAAGGGCCGAGTTAAG	AGAGAATCCTCTCGCCATCC	CCACAAAGGGCCGAGTTAAGAAGGAGGGGCATCTATGTATCTATTCAATGATAATAATTATTCTTGTCAAAGAGAATCCTCTCGCCATCC
571	ATATGTATATAAAACAAATCTAAAGTTACTTCTTCTACATTCTTCTTTGT	CCACAAAGGGCCGAGTTAAG	AGAGAATCCTCTCGCCATCC	CCACAAAGGGCCGAGTTAAGATATGTATATAAAACAAATCTAAAGTTACTTCTTCTACATTCTTCTTTGTAGAGAATCCTCTCGCCATCC
572	AGAGATAACCCCTGGAATTTGGTATCAGTATCATACACAATTAAACAAAG	CCACAAAGGGCCGAGTTAAG	AGAGAATCCTCTCGCCATCC	CCACAAAGGGCCGAGTTAAGAGAGATAACCCCTGGAATTTGGTATCAGTATCATACACAATTAAACAAAGAGAGAATCCTCTCGCCATCC
573	GCAACCTGCGCCGAACACCGAAAAGGATTATTATTCAAATTAATAAGATT	CCACAAAGGGCCGAGTTAAG	AGAGAATCCTCTCGCCATCC	CCACAAAGGGCCGAGTTAAGGCAACCTGCGCCGAACACCGAAAAGGATTATTATTCAAATTAATAAGATTAGAGAATCCTCTCGCCATCC
574	CGTACATGGAGTAGTACCTGTGAAGCAAATGGAGTTGACTTACCAATTCA	CCACAAAGGGCCGAGTTAAG	AGAGAATCCTCTCGCCATCC	CCACAAAGGGCCGAGTTAAGCGTACATGGAGTAGTACCTGTGAAGCAAATGGAGTTGACTTACCAATTCAAGAGAATCCTCTCGCCATCC
575	CATTGTTTCCAGAATACGCTTGCTTTTCTTATTGTTGCCCATCTTTTGAT	CCACAAAGGGCCGAGTTAAG	AGAGAATCCTCTCGCCATCC	CCACAAAGGGCCGAGTTAAGCATTGTTTCCAGAATACGCTTGCTTTTCTTATTGTTGCCCATCTTTTGATAGAGAATCCTCTCGCCATCC
576	TGAGCCACCACCACGTTTCAGGTTATATATAATGAAAATAGCAAGTAAAC	CCACAAAGGGCCGAGTTAAG	AGAGAATCCTCTCGCCATCC	CCACAAAGGGCCGAGTTAAGTGAGCCACCACCACGTTTCAGGTTATATATAATGAAAATAGCAAGTAAACAGAGAATCCTCTCGCCATCC
577	CTCCCTCTGTCTCAACAATGATAGATCCATGCCCATTTTAACGTATCCAA	CCACAAAGGGCCGAGTTAAG	AGAGAATCCTCTCGCCATCC	CCACAAAGGGCCGAGTTAAGCTCCCTCTGTCTCAACAATGATAGATCCATGCCCATTTTAACGTATCCAAAGAGAATCCTCTCGCCATCC
578	GTGGCAACCAGGTCCAGATCACTTGAATTTTACATGTAATTATCGTATTT	CCACAAAGGGCCGAGTTAAG	AGAGAATCCTCTCGCCATCC	CCACAAAGGGCCGAGTTAAGGTGGCAACCAGGTCCAGATCACTTGAATTTTACATGTAATTATCGTATTTAGAGAATCCTCTCGCCATCC
579	AAAGTTCTTTAATGCTAGAGAATATATTTTCTAAATGTGTAAATTGGAAA	CCACAAAGGGCCGAGTTAAG	AGAGAATCCTCTCGCCATCC	CCACAAAGGGCCGAGTTAAGAAAGTTCTTTAATGCTAGAGAATATATTTTCTAAATGTGTAAATTGGAAAAGAGAATCCTCTCGCCATCC
580	AAGAGGAAATTACTCATCAGTTATTCTTTTATTTGTTTTCATTCCATTTT	CCACAAAGGGCCGAGTTAAG	AGAGAATCCTCTCGCCATCC	CCACAAAGGGCCGAGTTAAGAAGAGGAAATTACTCATCAGTTATTCTTTTATTTGTTTTCATTCCATTTTAGAGAATCCTCTCGCCATCC
581	TTTATTTTGTGTGTGTTTGACAATAGCTGCCAGTTCATTTCCATGTTTCA	CCACAAAGGGCCGAGTTAAG	AGAGAATCCTCTCGCCATCC	CCACAAAGGGCCGAGTTAAGTTTATTTTGTGTGTGTTTGACAATAGCTGCCAGTTCATTTCCATGTTTCAAGAGAATCCTCTCGCCATCC
582	GGCATTGCTCCTTAGGCCCTAGTGCTTCTAAAACTAATCAACTTTCCAAT	CCACAAAGGGCCGAGTTAAG	AGAGAATCCTCTCGCCATCC	CCACAAAGGGCCGAGTTAAGGGCATTGCTCCTTAGGCCCTAGTGCTTCTAAAACTAATCAACTTTCCAATAGAGAATCCTCTCGCCATCC
583	TTTCCTAAATCTAAAAGCAGCATACTAGAATTTCAGCTTCTTCTAATAAC	CCACAAAGGGCCGAGTTAAG	AGAGAATCCTCTCGCCATCC	CCACAAAGGGCCGAGTTAAGTTTCCTAAATCTAAAAGCAGCATACTAGAATTTCAGCTTCTTCTAATAACAGAGAATCCTCTCGCCATCC
584	AGCTATTGATGGATAGTGATAAAGGGGTTATTACGTTCGAGAGTCTGAAG	CCACAAAGGGCCGAGTTAAG	AGAGAATCCTCTCGCCATCC	CCACAAAGGGCCGAGTTAAGAGCTATTGATGGATAGTGATAAAGGGGTTATTACGTTCGAGAGTCTGAAGAGAGAATCCTCTCGCCATCC
585	ACAGTTAAATTCTTGATTGTAGATATTGTTAAACTCATAGTCATACATGA	CCACAAAGGGCCGAGTTAAG	AGAGAATCCTCTCGCCATCC	CCACAAAGGGCCGAGTTAAGACAGTTAAATTCTTGATTGTAGATATTGTTAAACTCATAGTCATACATGAAGAGAATCCTCTCGCCATCC
586	AAAAGATAAAATTATGTTGCTAGCTCCAAAATAGAAGATCTAGATATTAA	CCACAAAGGGCCGAGTTAAG	AGAGAATCCTCTCGCCATCC	CCACAAAGGGCCGAGTTAAGAAAAGATAAAATTATGTTGCTAGCTCCAAAATAGAAGATCTAGATATTAAAGAGAATCCTCTCGCCATCC
587	GTAATATTTTACTAGATATTGATATGGAACCTAAGATATCAGACTTTGGC	CCACAAAGGGCCGAGTTAAG	AGAGAATCCTCTCGCCATCC	CCACAAAGGGCCGAGTTAAGGTAATATTTTACTAGATATTGATATGGAACCTAAGATATCAGACTTTGGCAGAGAATCCTCTCGCCATCC
588	CAGATGAAGGCCTATATTGTACCTGGAAGTCTCTAGATCCGCTCTCCCAT	CCACAAAGGGCCGAGTTAAG	AGAGAATCCTCTCGCCATCC	CCACAAAGGGCCGAGTTAAGCAGATGAAGGCCTATATTGTACCTGGAAGTCTCTAGATCCGCTCTCCCATAGAGAATCCTCTCGCCATCC
589	TGATTTATTTTGGCCTCCCCTCCAGTCTTTAGTGACCTTGAACACAGCCG	CCACAAAGGGCCGAGTTAAG	AGAGAATCCTCTCGCCATCC	CCACAAAGGGCCGAGTTAAGTGATTTATTTTGGCCTCCCCTCCAGTCTTTAGTGACCTTGAACACAGCCGAGAGAATCCTCTCGCCATCC
590	TAAAAGGTGTCGGTATCATGTATTTTCAATATACAATTACAACAACGGGG	CCACAAAGGGCCGAGTTAAG	AGAGAATCCTCTCGCCATCC	CCACAAAGGGCCGAGTTAAGTAAAAGGTGTCGGTATCATGTATTTTCAATATACAATTACAACAACGGGGAGAGAATCCTCTCGCCATCC
591	AATGGATTCTTTACCTAACTGCACCAAATGATAATTGTGATTCTTATGCA	CCACAAAGGGCCGAGTTAAG	AGAGAATCCTCTCGCCATCC	CCACAAAGGGCCGAGTTAAGAATGGATTCTTTACCTAACTGCACCAAATGATAATTGTGATTCTTATGCAAGAGAATCCTCTCGCCATCC
592	ATAAAGATCTAACATAGTCCTACCATTGTATTAATCTTGGTGTATAAAAT	CCACAAAGGGCCGAGTTAAG	AGAGAATCCTCTCGCCATCC	CCACAAAGGGCCGAGTTAAGATAAAGATCTAACATAGTCCTACCATTGTATTAATCTTGGTGTATAAAATAGAGAATCCTCTCGCCATCC
593	TGTCATTTAAATTGAAGCATACTAATTGTAGAAGCAGAAATGATAAATTG	CCACAAAGGGCCGAGTTAAG	AGAGAATCCTCTCGCCATCC	CCACAAAGGGCCGAGTTAAGTGTCATTTAAATTGAAGCATACTAATTGTAGAAGCAGAAATGATAAATTGAGAGAATCCTCTCGCCATCC
594	TAAAAGATTTTATCAGAAAAGTCCTCAAGTGCCCTAAAGCTATAAATGAA	CCACAAAGGGCCGAGTTAAG	AGAGAATCCTCTCGCCATCC	CCACAAAGGGCCGAGTTAAGTAAAAGATTTTATCAGAAAAGTCCTCAAGTGCCCTAAAGCTATAAATGAAAGAGAATCCTCTCGCCATCC
595	TTAGCATCTCTAATTTGTAAACCACCATGCTCCTTGGGTTTAATAATAGT	CCACAAAGGGCCGAGTTAAG	AGAGAATCCTCTCGCCATCC	CCACAAAGGGCCGAGTTAAGTTAGCATCTCTAATTTGTAAACCACCATGCTCCTTGGGTTTAATAATAGTAGAGAATCCTCTCGCCATCC
596	AAAACCAAGCTCTACTTTCCAACCTCTCCTGGCGTTTTCTTACTAGAGAT	CCACAAAGGGCCGAGTTAAG	AGAGAATCCTCTCGCCATCC	CCACAAAGGGCCGAGTTAAGAAAACCAAGCTCTACTTTCCAACCTCTCCTGGCGTTTTCTTACTAGAGATAGAGAATCCTCTCGCCATCC
597	AAATTGCTTTCATTATCTCATTTTGTTGATGTAATATTTATACACGTATC	CCACAAAGGGCCGAGTTAAG	AGAGAATCCTCTCGCCATCC	CCACAAAGGGCCGAGTTAAGAAATTGCTTTCATTATCTCATTTTGTTGATGTAATATTTATACACGTATCAGAGAATCCTCTCGCCATCC
598	AAAGCTGCCATCCATTTGTTTTGCCTTGCATTATTATATTCCTTAATTAC	CCACAAAGGGCCGAGTTAAG	AGAGAATCCTCTCGCCATCC	CCACAAAGGGCCGAGTTAAGAAAGCTGCCATCCATTTGTTTTGCCTTGCATTATTATATTCCTTAATTACAGAGAATCCTCTCGCCATCC
599	CACTTCAAATGAGTGATAAGAATTCATTTCGAAATTCTTTTACCCTTTCT	CCACAAAGGGCCGAGTTAAG	AGAGAATCCTCTCGCCATCC	CCACAAAGGGCCGAGTTAAGCACTTCAAATGAGTGATAAGAATTCATTTCGAAATTCTTTTACCCTTTCTAGAGAATCCTCTCGCCATCC
600	GGGTTTCGGTTAACATCTGCAAACGTGATAACTATTCTGGTTTTGGGCTC	CCACAAAGGGCCGAGTTAAG	AGAGAATCCTCTCGCCATCC	CCACAAAGGGCCGAGTTAAGGGGTTTCGGTTAACATCTGCAAACGTGATAACTATTCTGGTTTTGGGCTCAGAGAATCCTCTCGCCATCC
601	TAATAAATATGTGGTGAAAGTTTGTAACAATAATATTACTCTCTCTCTCT	CCACAAAGGGCCGAGTTAAG	AGAGAATCCTCTCGCCATCC	CCACAAAGGGCCGAGTTAAGTAATAAATATGTGGTGAAAGTTTGTAACAATAATATTACTCTCTCTCTCTAGAGAATCCTCTCGCCATCC
602	CCTTCTCTACTTTGAAACATGTATATGAGAGTCATTTTCTTCAATTCTTT	CCACAAAGGGCCGAGTTAAG	AGAGAATCCTCTCGCCATCC	CCACAAAGGGCCGAGTTAAGCCTTCTCTACTTTGAAACATGTATATGAGAGTCATTTTCTTCAATTCTTTAGAGAATCCTCTCGCCATCC
603	TCAAGCTACTGTGTTGTTGCCACCGTGTTGTAGTTGTTGCCGCCACTCCG	CCACAAAGGGCCGAGTTAAG	AGAGAATCCTCTCGCCATCC	CCACAAAGGGCCGAGTTAAGTCAAGCTACTGTGTTGTTGCCACCGTGTTGTAGTTGTTGCCGCCACTCCGAGAGAATCCTCTCGCCATCC
604	AAGTGATGAGTCCTATGCTTACATCCATTAATAGTCAAATCCCGTTACAC	CCACAAAGGGCCGAGTTAAG	AGAGAATCCTCTCGCCATCC	CCACAAAGGGCCGAGTTAAGAAGTGATGAGTCCTATGCTTACATCCATTAATAGTCAAATCCCGTTACACAGAGAATCCTCTCGCCATCC
605	GAAAAGGAGCATCTTTCTTCTGGGACTGCATGATCTCAGAGACGAAGAAC	CCACAAAGGGCCGAGTTAAG	AGAGAATCCTCTCGCCATCC	CCACAAAGGGCCGAGTTAAGGAAAAGGAGCATCTTTCTTCTGGGACTGCATGATCTCAGAGACGAAGAACAGAGAATCCTCTCGCCATCC
606	TCTCTCTCTCTCTGTCACTATATCTATTTGAATCTCTAGACGCTTCTTTT	CCACAAAGGGCCGAGTTAAG	AGAGAATCCTCTCGCCATCC	CCACAAAGGGCCGAGTTAAGTCTCTCTCTCTCTGTCACTATATCTATTTGAATCTCTAGACGCTTCTTTTAGAGAATCCTCTCGCCATCC
607	CCCCACCAACTACTCTTCGATATATTATATCTGTATCCACCTTTACATGT	CCACAAAGGGCCGAGTTAAG	AGAGAATCCTCTCGCCATCC	CCACAAAGGGCCGAGTTAAGCCCCACCAACTACTCTTCGATATATTATATCTGTATCCACCTTTACATGTAGAGAATCCTCTCGCCATCC
608	TCTGTTTCCCTTTCTGTGTCTCTGTTTCTCTCTCTATCCGGAGTCTGGAC	CCACAAAGGGCCGAGTTAAG	AGAGAATCCTCTCGCCATCC	CCACAAAGGGCCGAGTTAAGTCTGTTTCCCTTTCTGTGTCTCTGTTTCTCTCTCTATCCGGAGTCTGGACAGAGAATCCTCTCGCCATCC
609	CTGCTGCAGAAGAACAGAACAGAGCCATGGAATTGAAGATGTCGAGAAGA	CCACAAAGGGCCGAGTTAAG	AGAGAATCCTCTCGCCATCC	CCACAAAGGGCCGAGTTAAGCTGCTGCAGAAGAACAGAACAGAGCCATGGAATTGAAGATGTCGAGAAGAAGAGAATCCTCTCGCCATCC
610	AGCCAAACTTCAGAAAACCTATATGAAACCCAATTAATCCGTTGTGGCAT	CCACAAAGGGCCGAGTTAAG	AGAGAATCCTCTCGCCATCC	CCACAAAGGGCCGAGTTAAGAGCCAAACTTCAGAAAACCTATATGAAACCCAATTAATCCGTTGTGGCATAGAGAATCCTCTCGCCATCC
611	TGATCCATCTCTGTTGGTTCAAGCTGTTACTGAATTTGCTTATAGTCCCT	CCACAAAGGGCCGAGTTAAG	AGAGAATCCTCTCGCCATCC	CCACAAAGGGCCGAGTTAAGTGATCCATCTCTGTTGGTTCAAGCTGTTACTGAATTTGCTTATAGTCCCTAGAGAATCCTCTCGCCATCC
612	CAAATAATTTTACCAAAATGTTGTCGATCTTAGAAAACTGCCAAATATAC	CCACAAAGGGCCGAGTTAAG	AGAGAATCCTCTCGCCATCC	CCACAAAGGGCCGAGTTAAGCAAATAATTTTACCAAAATGTTGTCGATCTTAGAAAACTGCCAAATATACAGAGAATCCTCTCGCCATCC
613	TTCTTTATTGCTATATAACAATGAATAACTTTTATCCATGGTGAAAACTA	CCACAAAGGGCCGAGTTAAG	AGAGAATCCTCTCGCCATCC	CCACAAAGGGCCGAGTTAAGTTCTTTATTGCTATATAACAATGAATAACTTTTATCCATGGTGAAAACTAAGAGAATCCTCTCGCCATCC
614	TTACATACTTAACATTTTGTATACCTTGTTCAGAACTTTTGCTCATTATA	CCACAAAGGGCCGAGTTAAG	AGAGAATCCTCTCGCCATCC	CCACAAAGGGCCGAGTTAAGTTACATACTTAACATTTTGTATACCTTGTTCAGAACTTTTGCTCATTATAAGAGAATCCTCTCGCCATCC
615	AGATATCTTTCACAAATTACAGAGAATAAACGATGGTGACTAAAATGCAC	CCACAAAGGGCCGAGTTAAG	AGAGAATCCTCTCGCCATCC	CCACAAAGGGCCGAGTTAAGAGATATCTTTCACAAATTACAGAGAATAAACGATGGTGACTAAAATGCACAGAGAATCCTCTCGCCATCC
616	ATTCGCCTTCCCTTGTTTTCCTGCTATAGTTGTTCACTTGGTGTTTATGA	CCACAAAGGGCCGAGTTAAG	AGAGAATCCTCTCGCCATCC	CCACAAAGGGCCGAGTTAAGATTCGCCTTCCCTTGTTTTCCTGCTATAGTTGTTCACTTGGTGTTTATGAAGAGAATCCTCTCGCCATCC
617	TACCTTCCTTCCATTCTCAACTCGCCATTGTAATCCATTAACTTGCAATT	CCACAAAGGGCCGAGTTAAG	AGAGAATCCTCTCGCCATCC	CCACAAAGGGCCGAGTTAAGTACCTTCCTTCCATTCTCAACTCGCCATTGTAATCCATTAACTTGCAATTAGAGAATCCTCTCGCCATCC
618	GATCACCCGTCATTATGATATTGTTCCAATCTTCCACCATTAGCATGAAG	CCACAAAGGGCCGAGTTAAG	AGAGAATCCTCTCGCCATCC	CCACAAAGGGCCGAGTTAAGGATCACCCGTCATTATGATATTGTTCCAATCTTCCACCATTAGCATGAAGAGAGAATCCTCTCGCCATCC
619	CAATTTGGGAAGTGGCATAACATGAGGATAAATATGTTCTAGGAAGCAGA	CCACAAAGGGCCGAGTTAAG	AGAGAATCCTCTCGCCATCC	CCACAAAGGGCCGAGTTAAGCAATTTGGGAAGTGGCATAACATGAGGATAAATATGTTCTAGGAAGCAGAAGAGAATCCTCTCGCCATCC
620	ACCTTCTTCTACAGATAAACCCAATACCAATCTATCTTCCATTGAGTATT	CCACAAAGGGCCGAGTTAAG	AGAGAATCCTCTCGCCATCC	CCACAAAGGGCCGAGTTAAGACCTTCTTCTACAGATAAACCCAATACCAATCTATCTTCCATTGAGTATTAGAGAATCCTCTCGCCATCC
621	CTCAAACAAGGAAGTCATTGATGGAAATATCTCTACAAAGGAACAACTAG	CCACAAAGGGCCGAGTTAAG	AGAGAATCCTCTCGCCATCC	CCACAAAGGGCCGAGTTAAGCTCAAACAAGGAAGTCATTGATGGAAATATCTCTACAAAGGAACAACTAGAGAGAATCCTCTCGCCATCC
622	TTTATATAATATGGATCAAAACATTCATCTAAATTTTCATTACATTACAT	CCACAAAGGGCCGAGTTAAG	AGAGAATCCTCTCGCCATCC	CCACAAAGGGCCGAGTTAAGTTTATATAATATGGATCAAAACATTCATCTAAATTTTCATTACATTACATAGAGAATCCTCTCGCCATCC
623	GATCTAAGTGCGTTTAGGAAGAGAAAACCAAACCAGAAACTACAGCTGAG	CCACAAAGGGCCGAGTTAAG	AGAGAATCCTCTCGCCATCC	CCACAAAGGGCCGAGTTAAGGATCTAAGTGCGTTTAGGAAGAGAAAACCAAACCAGAAACTACAGCTGAGAGAGAATCCTCTCGCCATCC
624	GCACGAAACAGGGCAAGCGTAAGTGTACCTCCGAGAAATGCTACTTAAAG	CCACAAAGGGCCGAGTTAAG	AGAGAATCCTCTCGCCATCC	CCACAAAGGGCCGAGTTAAGGCACGAAACAGGGCAAGCGTAAGTGTACCTCCGAGAAATGCTACTTAAAGAGAGAATCCTCTCGCCATCC
625	TCCCCAAGTTTCCCTCATCCTTTATCATTTCCACCCTACCCCTTCACCCT	CCACAAAGGGCCGAGTTAAG	AGAGAATCCTCTCGCCATCC	CCACAAAGGGCCGAGTTAAGTCCCCAAGTTTCCCTCATCCTTTATCATTTCCACCCTACCCCTTCACCCTAGAGAATCCTCTCGCCATCC
626	TTTTAGTTAATGTCCAGATTGACTCCCATATAAAATTCATACTTACAGCA	CCACAAAGGGCCGAGTTAAG	AGAGAATCCTCTCGCCATCC	CCACAAAGGGCCGAGTTAAGTTTTAGTTAATGTCCAGATTGACTCCCATATAAAATTCATACTTACAGCAAGAGAATCCTCTCGCCATCC
627	AGTCATCAGTAATTTCATTAAACTGCAAACTAGGAATTACATCACTTTAG	CCACAAAGGGCCGAGTTAAG	AGAGAATCCTCTCGCCATCC	CCACAAAGGGCCGAGTTAAGAGTCATCAGTAATTTCATTAAACTGCAAACTAGGAATTACATCACTTTAGAGAGAATCCTCTCGCCATCC
628	AATTAAGGTTTCTATTTTACTGTATGATATTGATTCTTAAATTCAATTGA	CCACAAAGGGCCGAGTTAAG	AGAGAATCCTCTCGCCATCC	CCACAAAGGGCCGAGTTAAGAATTAAGGTTTCTATTTTACTGTATGATATTGATTCTTAAATTCAATTGAAGAGAATCCTCTCGCCATCC
629	CCACTTTCGTCTTCGTGTTCCTACTCCTTGGCCTCGACAATTTAGCTAAG	CCACAAAGGGCCGAGTTAAG	AGAGAATCCTCTCGCCATCC	CCACAAAGGGCCGAGTTAAGCCACTTTCGTCTTCGTGTTCCTACTCCTTGGCCTCGACAATTTAGCTAAGAGAGAATCCTCTCGCCATCC
630	TAGAAACGGGAGATGGAATAGAAGAGAATGGATTTCGGCCTTTCCTGAGG	CCACAAAGGGCCGAGTTAAG	AGAGAATCCTCTCGCCATCC	CCACAAAGGGCCGAGTTAAGTAGAAACGGGAGATGGAATAGAAGAGAATGGATTTCGGCCTTTCCTGAGGAGAGAATCCTCTCGCCATCC
631	AACAATTTGATCATCGACCGTAAGTAGTTCAATATGTAAGGAATTGGAAT	CCACAAAGGGCCGAGTTAAG	AGAGAATCCTCTCGCCATCC	CCACAAAGGGCCGAGTTAAGAACAATTTGATCATCGACCGTAAGTAGTTCAATATGTAAGGAATTGGAATAGAGAATCCTCTCGCCATCC
632	GGGCCCCGGTTACACTTTCCTGTACCAAGTCCTTTGTAGATGTCATAAGA	CCACAAAGGGCCGAGTTAAG	AGAGAATCCTCTCGCCATCC	CCACAAAGGGCCGAGTTAAGGGGCCCCGGTTACACTTTCCTGTACCAAGTCCTTTGTAGATGTCATAAGAAGAGAATCCTCTCGCCATCC
633	AATGCCAGCGGTAATTTGGGGTTGGTCCAGAAGTTAGCTCAGCTGCGAGA	CCACAAAGGGCCGAGTTAAG	AGAGAATCCTCTCGCCATCC	CCACAAAGGGCCGAGTTAAGAATGCCAGCGGTAATTTGGGGTTGGTCCAGAAGTTAGCTCAGCTGCGAGAAGAGAATCCTCTCGCCATCC
634	GAAATCTCGTTTATGGTTTTCTCCGAATACACCTTGCTACTTACGACATT	CCACAAAGGGCCGAGTTAAG	AGAGAATCCTCTCGCCATCC	CCACAAAGGGCCGAGTTAAGGAAATCTCGTTTATGGTTTTCTCCGAATACACCTTGCTACTTACGACATTAGAGAATCCTCTCGCCATCC
635	AAGGAAGAGAGGGAGGAGGAGAAAGATGGGAATTGTTCGAGTCCTAAAGG	CCACAAAGGGCCGAGTTAAG	AGAGAATCCTCTCGCCATCC	CCACAAAGGGCCGAGTTAAGAAGGAAGAGAGGGAGGAGGAGAAAGATGGGAATTGTTCGAGTCCTAAAGGAGAGAATCCTCTCGCCATCC
636	CATGTGAAGTCCAATGGTTTCATTATTTGTTTAAAGACTTGCAAGTTCCT	CCACAAAGGGCCGAGTTAAG	AGAGAATCCTCTCGCCATCC	CCACAAAGGGCCGAGTTAAGCATGTGAAGTCCAATGGTTTCATTATTTGTTTAAAGACTTGCAAGTTCCTAGAGAATCCTCTCGCCATCC
637	CTCGTAATTGCTTTCTCCACTGTAAAAGTTAACCTAGTTGTGTTGTGTGA	CCACAAAGGGCCGAGTTAAG	AGAGAATCCTCTCGCCATCC	CCACAAAGGGCCGAGTTAAGCTCGTAATTGCTTTCTCCACTGTAAAAGTTAACCTAGTTGTGTTGTGTGAAGAGAATCCTCTCGCCATCC
638	AAGGACATATTACTCACAAAACAATAACAGTTGCTTAAAGTAATCAAACT	CCACAAAGGGCCGAGTTAAG	AGAGAATCCTCTCGCCATCC	CCACAAAGGGCCGAGTTAAGAAGGACATATTACTCACAAAACAATAACAGTTGCTTAAAGTAATCAAACTAGAGAATCCTCTCGCCATCC
639	TCCTTTTATTCACGGTTAGTTTATACTGTTCCATATTGGCTTTGTTTTAA	CCACAAAGGGCCGAGTTAAG	AGAGAATCCTCTCGCCATCC	CCACAAAGGGCCGAGTTAAGTCCTTTTATTCACGGTTAGTTTATACTGTTCCATATTGGCTTTGTTTTAAAGAGAATCCTCTCGCCATCC
640	TCAATCTTTGAGTTGGGAGGTGAACAAGATTTAATTATATTCAAGAGAAA	CCACAAAGGGCCGAGTTAAG	AGAGAATCCTCTCGCCATCC	CCACAAAGGGCCGAGTTAAGTCAATCTTTGAGTTGGGAGGTGAACAAGATTTAATTATATTCAAGAGAAAAGAGAATCCTCTCGCCATCC
641	AGTCTTCAGTCATACCATTACTTCTACACGACTTCTTAGTTTATTGACAA	CCACAAAGGGCCGAGTTAAG	AGAGAATCCTCTCGCCATCC	CCACAAAGGGCCGAGTTAAGAGTCTTCAGTCATACCATTACTTCTACACGACTTCTTAGTTTATTGACAAAGAGAATCCTCTCGCCATCC
642	AAACTTGGTATATTATATAATTTCTTTTGAGATTGATGGCAAGTGGTCAT	CCACAAAGGGCCGAGTTAAG	AGAGAATCCTCTCGCCATCC	CCACAAAGGGCCGAGTTAAGAAACTTGGTATATTATATAATTTCTTTTGAGATTGATGGCAAGTGGTCATAGAGAATCCTCTCGCCATCC
643	CTCAAAACCATACGTTACTAAGCCTTCTCTTATAAAAGTTAAAATTGTAC	CCACAAAGGGCCGAGTTAAG	AGAGAATCCTCTCGCCATCC	CCACAAAGGGCCGAGTTAAGCTCAAAACCATACGTTACTAAGCCTTCTCTTATAAAAGTTAAAATTGTACAGAGAATCCTCTCGCCATCC
644	TGGACAGTTACGCTAAGCAAATGTCTGATCCAAAGCTCATTATCTTCTAA	CCACAAAGGGCCGAGTTAAG	AGAGAATCCTCTCGCCATCC	CCACAAAGGGCCGAGTTAAGTGGACAGTTACGCTAAGCAAATGTCTGATCCAAAGCTCATTATCTTCTAAAGAGAATCCTCTCGCCATCC
645	ACCTCCCACCTACGGAATTTTCTATTGAAAGGGATAAAGATCTTCAAAAT	CCACAAAGGGCCGAGTTAAG	AGAGAATCCTCTCGCCATCC	CCACAAAGGGCCGAGTTAAGACCTCCCACCTACGGAATTTTCTATTGAAAGGGATAAAGATCTTCAAAATAGAGAATCCTCTCGCCATCC
646	TGATTCCGACAGATGACCATTGTCTCATTACTCCTTGTAGAGATCTTCTT	CCACAAAGGGCCGAGTTAAG	AGAGAATCCTCTCGCCATCC	CCACAAAGGGCCGAGTTAAGTGATTCCGACAGATGACCATTGTCTCATTACTCCTTGTAGAGATCTTCTTAGAGAATCCTCTCGCCATCC
647	GTAGCCTCATTATTTTCTGTAGATGGGACGGCGACATGGTGTTTGATGAA	CCACAAAGGGCCGAGTTAAG	AGAGAATCCTCTCGCCATCC	CCACAAAGGGCCGAGTTAAGGTAGCCTCATTATTTTCTGTAGATGGGACGGCGACATGGTGTTTGATGAAAGAGAATCCTCTCGCCATCC
648	TAAACATGTATTTATGGAATTGATGTAACTGAAAGACCTTCGTTGGTGTC	CCACAAAGGGCCGAGTTAAG	AGAGAATCCTCTCGCCATCC	CCACAAAGGGCCGAGTTAAGTAAACATGTATTTATGGAATTGATGTAACTGAAAGACCTTCGTTGGTGTCAGAGAATCCTCTCGCCATCC
649	TTTCTCAGTTGTTCCTCTGTTATTATAATCTTCTCTGTTTATCAATAAGC	CCACAAAGGGCCGAGTTAAG	AGAGAATCCTCTCGCCATCC	CCACAAAGGGCCGAGTTAAGTTTCTCAGTTGTTCCTCTGTTATTATAATCTTCTCTGTTTATCAATAAGCAGAGAATCCTCTCGCCATCC
650	CGACAATTTTATCTGCCAAGTTATACACAGAAGTTATACACAATACATCT	CCACAAAGGGCCGAGTTAAG	AGAGAATCCTCTCGCCATCC	CCACAAAGGGCCGAGTTAAGCGACAATTTTATCTGCCAAGTTATACACAGAAGTTATACACAATACATCTAGAGAATCCTCTCGCCATCC
651	AAGAAAAGAAAGCCATTACGCTAAGAAATTATGAAGCCACTTTCTAATGG	CCACAAAGGGCCGAGTTAAG	AGAGAATCCTCTCGCCATCC	CCACAAAGGGCCGAGTTAAGAAGAAAAGAAAGCCATTACGCTAAGAAATTATGAAGCCACTTTCTAATGGAGAGAATCCTCTCGCCATCC
652	ACAAACATATAAATAGACAACATTTAGAAAGAAGTACAGAAGTGCACATA	CCACAAAGGGCCGAGTTAAG	AGAGAATCCTCTCGCCATCC	CCACAAAGGGCCGAGTTAAGACAAACATATAAATAGACAACATTTAGAAAGAAGTACAGAAGTGCACATAAGAGAATCCTCTCGCCATCC
653	AGACAGAGTCACCTTACTGGAGTTCTTTAAAGCTGTTGCACTTCGAGATG	CCACAAAGGGCCGAGTTAAG	AGAGAATCCTCTCGCCATCC	CCACAAAGGGCCGAGTTAAGAGACAGAGTCACCTTACTGGAGTTCTTTAAAGCTGTTGCACTTCGAGATGAGAGAATCCTCTCGCCATCC
654	CTCTCAAGAATAAAATCAACCCCTCTAACAGAAATAAAATCAATGAACTG	CCACAAAGGGCCGAGTTAAG	AGAGAATCCTCTCGCCATCC	CCACAAAGGGCCGAGTTAAGCTCTCAAGAATAAAATCAACCCCTCTAACAGAAATAAAATCAATGAACTGAGAGAATCCTCTCGCCATCC
655	ATGATTGGAAAATTAGGATTTCTTATGATGTTGTTTTGATAGATGAAACA	CCACAAAGGGCCGAGTTAAG	AGAGAATCCTCTCGCCATCC	CCACAAAGGGCCGAGTTAAGATGATTGGAAAATTAGGATTTCTTATGATGTTGTTTTGATAGATGAAACAAGAGAATCCTCTCGCCATCC
656	AGGAATAAGTGGACAACTGGCCGATGGGAAATTAATCATAAACAGAGGGC	CCACAAAGGGCCGAGTTAAG	AGAGAATCCTCTCGCCATCC	CCACAAAGGGCCGAGTTAAGAGGAATAAGTGGACAACTGGCCGATGGGAAATTAATCATAAACAGAGGGCAGAGAATCCTCTCGCCATCC
657	TGTTTGAAAACTGCTGTGATTTCATTGGTGGAGATTAATCGGTTCATGAG	CCACAAAGGGCCGAGTTAAG	AGAGAATCCTCTCGCCATCC	CCACAAAGGGCCGAGTTAAGTGTTTGAAAACTGCTGTGATTTCATTGGTGGAGATTAATCGGTTCATGAGAGAGAATCCTCTCGCCATCC
658	GGATCTAGCTACAGAAGAAACGGAGTTGGAAGAAGAAGAGCGAGAATCGG	CCACAAAGGGCCGAGTTAAG	AGAGAATCCTCTCGCCATCC	CCACAAAGGGCCGAGTTAAGGGATCTAGCTACAGAAGAAACGGAGTTGGAAGAAGAAGAGCGAGAATCGGAGAGAATCCTCTCGCCATCC
659	TTGAATTTATTTACTTTGTCGAAAATGAAGATGAACCGGGTAAACAGGTG	CCACAAAGGGCCGAGTTAAG	AGAGAATCCTCTCGCCATCC	CCACAAAGGGCCGAGTTAAGTTGAATTTATTTACTTTGTCGAAAATGAAGATGAACCGGGTAAACAGGTGAGAGAATCCTCTCGCCATCC
660	TATGGAGTATTTTCTTATCTTTCATTGGCTTTTAATCAATTCATTCTGTA	CCACAAAGGGCCGAGTTAAG	AGAGAATCCTCTCGCCATCC	CCACAAAGGGCCGAGTTAAGTATGGAGTATTTTCTTATCTTTCATTGGCTTTTAATCAATTCATTCTGTAAGAGAATCCTCTCGCCATCC
661	TTTATCAGCAAAACTAAAGCATCATTAAGCATCAGATTAACCTGTTGGAT	CCACAAAGGGCCGAGTTAAG	AGAGAATCCTCTCGCCATCC	CCACAAAGGGCCGAGTTAAGTTTATCAGCAAAACTAAAGCATCATTAAGCATCAGATTAACCTGTTGGATAGAGAATCCTCTCGCCATCC
662	AGTATTAGTCATATTTAACTGCAGTGCTCTTTCTTTATATGGTTGTCTTG	CCACAAAGGGCCGAGTTAAG	AGAGAATCCTCTCGCCATCC	CCACAAAGGGCCGAGTTAAGAGTATTAGTCATATTTAACTGCAGTGCTCTTTCTTTATATGGTTGTCTTGAGAGAATCCTCTCGCCATCC
663	GGATGACTCTCCTGAAATTTGTAGATATGGTATTTTACTTTTCTAGAAGT	CCACAAAGGGCCGAGTTAAG	AGAGAATCCTCTCGCCATCC	CCACAAAGGGCCGAGTTAAGGGATGACTCTCCTGAAATTTGTAGATATGGTATTTTACTTTTCTAGAAGTAGAGAATCCTCTCGCCATCC
664	TATTGATCTTTAAGTGGAGGCTGTAATAATAAGTTGACACGCACATAGGC	CCACAAAGGGCCGAGTTAAG	AGAGAATCCTCTCGCCATCC	CCACAAAGGGCCGAGTTAAGTATTGATCTTTAAGTGGAGGCTGTAATAATAAGTTGACACGCACATAGGCAGAGAATCCTCTCGCCATCC
665	ACCTGAAAATTTATGAAATCGAGAGACAGACATTATTATTGGTTTATTGG	CCACAAAGGGCCGAGTTAAG	AGAGAATCCTCTCGCCATCC	CCACAAAGGGCCGAGTTAAGACCTGAAAATTTATGAAATCGAGAGACAGACATTATTATTGGTTTATTGGAGAGAATCCTCTCGCCATCC
666	ACAAAGTACTTGGAAGGTTAAATTTTGATAGTTGGAGATTTGCTGTCCAA	CCACAAAGGGCCGAGTTAAG	AGAGAATCCTCTCGCCATCC	CCACAAAGGGCCGAGTTAAGACAAAGTACTTGGAAGGTTAAATTTTGATAGTTGGAGATTTGCTGTCCAAAGAGAATCCTCTCGCCATCC
667	TCATAGATTTAATGATGAAGTTGAATTTCCTCCAATATTATATAATGAGA	CCACAAAGGGCCGAGTTAAG	AGAGAATCCTCTCGCCATCC	CCACAAAGGGCCGAGTTAAGTCATAGATTTAATGATGAAGTTGAATTTCCTCCAATATTATATAATGAGAAGAGAATCCTCTCGCCATCC
668	TCTGGAACACATTGTCTACTAAGGAGTGGATTTGGATAAATTTGGGAAGA	CCACAAAGGGCCGAGTTAAG	AGAGAATCCTCTCGCCATCC	CCACAAAGGGCCGAGTTAAGTCTGGAACACATTGTCTACTAAGGAGTGGATTTGGATAAATTTGGGAAGAAGAGAATCCTCTCGCCATCC
669	CTGGAGTTCGACAATATCTTCCAAAGAAAGAGATAATGTAAAGCAAGATT	CCACAAAGGGCCGAGTTAAG	AGAGAATCCTCTCGCCATCC	CCACAAAGGGCCGAGTTAAGCTGGAGTTCGACAATATCTTCCAAAGAAAGAGATAATGTAAAGCAAGATTAGAGAATCCTCTCGCCATCC
670	TTGTTTGGTGGCTCTTCTAGAAACCAAGGTACATAGTAGTAAAATGGAAA	CCACAAAGGGCCGAGTTAAG	AGAGAATCCTCTCGCCATCC	CCACAAAGGGCCGAGTTAAGTTGTTTGGTGGCTCTTCTAGAAACCAAGGTACATAGTAGTAAAATGGAAAAGAGAATCCTCTCGCCATCC
671	TATGATACTTAACCATATCCAAAATATGAGAAGTTGTTTTCGGGGAGCCT	CCACAAAGGGCCGAGTTAAG	AGAGAATCCTCTCGCCATCC	CCACAAAGGGCCGAGTTAAGTATGATACTTAACCATATCCAAAATATGAGAAGTTGTTTTCGGGGAGCCTAGAGAATCCTCTCGCCATCC
672	GGTTAGAGGCAAATATGTCAAAGTGTGTGTTGAGGTGGATTTGGATAAAC	CCACAAAGGGCCGAGTTAAG	AGAGAATCCTCTCGCCATCC	CCACAAAGGGCCGAGTTAAGGGTTAGAGGCAAATATGTCAAAGTGTGTGTTGAGGTGGATTTGGATAAACAGAGAATCCTCTCGCCATCC
673	GATATTCCCTGGGACCATTATCATAACTATTGGAAACCGTGGAGGAAGGC	CCACAAAGGGCCGAGTTAAG	AGAGAATCCTCTCGCCATCC	CCACAAAGGGCCGAGTTAAGGATATTCCCTGGGACCATTATCATAACTATTGGAAACCGTGGAGGAAGGCAGAGAATCCTCTCGCCATCC
674	GGTTCCTTCGGAGATTCTGCCATATCCTCCTCTTGATCGGTCGACTCACA	CCACAAAGGGCCGAGTTAAG	AGAGAATCCTCTCGCCATCC	CCACAAAGGGCCGAGTTAAGGGTTCCTTCGGAGATTCTGCCATATCCTCCTCTTGATCGGTCGACTCACAAGAGAATCCTCTCGCCATCC
675	TTCTAGTCATCAACACAAGCGATATGAGAATCCGACATACCATAACAATG	CCACAAAGGGCCGAGTTAAG	AGAGAATCCTCTCGCCATCC	CCACAAAGGGCCGAGTTAAGTTCTAGTCATCAACACAAGCGATATGAGAATCCGACATACCATAACAATGAGAGAATCCTCTCGCCATCC
676	AGAGAAAGAAGCAGTGTTCGATGAATTTGTTGGAAAGATATTGAAGTTTT	CCACAAAGGGCCGAGTTAAG	AGAGAATCCTCTCGCCATCC	CCACAAAGGGCCGAGTTAAGAGAGAAAGAAGCAGTGTTCGATGAATTTGTTGGAAAGATATTGAAGTTTTAGAGAATCCTCTCGCCATCC
677	TGAGTAACAAATGAACCAAAATCTGTCCCAACAATGCATTGCCATCCTGC	CCACAAAGGGCCGAGTTAAG	AGAGAATCCTCTCGCCATCC	CCACAAAGGGCCGAGTTAAGTGAGTAACAAATGAACCAAAATCTGTCCCAACAATGCATTGCCATCCTGCAGAGAATCCTCTCGCCATCC
678	CACAACCTTATAGTTAGATAAAATTCATATTAATCTATCCATAATATTGC	CCACAAAGGGCCGAGTTAAG	AGAGAATCCTCTCGCCATCC	CCACAAAGGGCCGAGTTAAGCACAACCTTATAGTTAGATAAAATTCATATTAATCTATCCATAATATTGCAGAGAATCCTCTCGCCATCC
679	GAGATATAAAATATCACCTCTGCTTGGACTTAGTCAGACAGGTATATATA	CCACAAAGGGCCGAGTTAAG	AGAGAATCCTCTCGCCATCC	CCACAAAGGGCCGAGTTAAGGAGATATAAAATATCACCTCTGCTTGGACTTAGTCAGACAGGTATATATAAGAGAATCCTCTCGCCATCC
680	TGTTCATCATCATTGTTCTCACTACTGGACTTCTTCTGGTTACCATGTTA	CCACAAAGGGCCGAGTTAAG	AGAGAATCCTCTCGCCATCC	CCACAAAGGGCCGAGTTAAGTGTTCATCATCATTGTTCTCACTACTGGACTTCTTCTGGTTACCATGTTAAGAGAATCCTCTCGCCATCC
681	GAGCCGATTTACTATGGAACAAGAAGCCTCGTGAAAGACAGGTTTCGACT	CCACAAAGGGCCGAGTTAAG	AGAGAATCCTCTCGCCATCC	CCACAAAGGGCCGAGTTAAGGAGCCGATTTACTATGGAACAAGAAGCCTCGTGAAAGACAGGTTTCGACTAGAGAATCCTCTCGCCATCC
682	AACTGCTACTGCTACCTAGATCTCTTAATTAATGATTTATGATTAATATT	CCACAAAGGGCCGAGTTAAG	AGAGAATCCTCTCGCCATCC	CCACAAAGGGCCGAGTTAAGAACTGCTACTGCTACCTAGATCTCTTAATTAATGATTTATGATTAATATTAGAGAATCCTCTCGCCATCC
683	CATGGAATATGGTTTGTGAAGAATTGGTACGATTGAATTATGAAACATAT	CCACAAAGGGCCGAGTTAAG	AGAGAATCCTCTCGCCATCC	CCACAAAGGGCCGAGTTAAGCATGGAATATGGTTTGTGAAGAATTGGTACGATTGAATTATGAAACATATAGAGAATCCTCTCGCCATCC
684	GAAGGGAGTCATAAGAACATTTTAGGTAACCTTGAACTGAACTTTCTTTT	CCACAAAGGGCCGAGTTAAG	AGAGAATCCTCTCGCCATCC	CCACAAAGGGCCGAGTTAAGGAAGGGAGTCATAAGAACATTTTAGGTAACCTTGAACTGAACTTTCTTTTAGAGAATCCTCTCGCCATCC
685	GCTAAGGCGATAGTAAGAGTAAAAGAAGGTTAGGTATTGGCAACGACAAG	CCACAAAGGGCCGAGTTAAG	AGAGAATCCTCTCGCCATCC	CCACAAAGGGCCGAGTTAAGGCTAAGGCGATAGTAAGAGTAAAAGAAGGTTAGGTATTGGCAACGACAAGAGAGAATCCTCTCGCCATCC
686	GTTGTTCTCATGCTCTTTTCTGGAACTCTTGTAGTAACTTTCTCAACCTG	CCACAAAGGGCCGAGTTAAG	AGAGAATCCTCTCGCCATCC	CCACAAAGGGCCGAGTTAAGGTTGTTCTCATGCTCTTTTCTGGAACTCTTGTAGTAACTTTCTCAACCTGAGAGAATCCTCTCGCCATCC
687	AATATTCTACAGAAATTTTAGTTGCACTGGACTTTATTTATCATTCTGCT	CCACAAAGGGCCGAGTTAAG	AGAGAATCCTCTCGCCATCC	CCACAAAGGGCCGAGTTAAGAATATTCTACAGAAATTTTAGTTGCACTGGACTTTATTTATCATTCTGCTAGAGAATCCTCTCGCCATCC
688	CTGGAATCTAAAATTGATCCAGCTAGCTTCTTGTTCTTTCCTTTGTTTGT	CCACAAAGGGCCGAGTTAAG	AGAGAATCCTCTCGCCATCC	CCACAAAGGGCCGAGTTAAGCTGGAATCTAAAATTGATCCAGCTAGCTTCTTGTTCTTTCCTTTGTTTGTAGAGAATCCTCTCGCCATCC
689	ACTGCCGGTGATATGTTTGTTCTAGGGCTCCTATTATTCTATTATTTTAT	CCACAAAGGGCCGAGTTAAG	AGAGAATCCTCTCGCCATCC	CCACAAAGGGCCGAGTTAAGACTGCCGGTGATATGTTTGTTCTAGGGCTCCTATTATTCTATTATTTTATAGAGAATCCTCTCGCCATCC
690	AAAATAAATTGTGGATAGAAAGATATGAGTTGGAGATACTAAAATCTTTG	CCACAAAGGGCCGAGTTAAG	AGAGAATCCTCTCGCCATCC	CCACAAAGGGCCGAGTTAAGAAAATAAATTGTGGATAGAAAGATATGAGTTGGAGATACTAAAATCTTTGAGAGAATCCTCTCGCCATCC
691	AGGTTGTAGCTAATAGTTAGTACTCAGTACGCCTCTGTTGTAATTTTGTA	CCACAAAGGGCCGAGTTAAG	AGAGAATCCTCTCGCCATCC	CCACAAAGGGCCGAGTTAAGAGGTTGTAGCTAATAGTTAGTACTCAGTACGCCTCTGTTGTAATTTTGTAAGAGAATCCTCTCGCCATCC
692	TCAATATAAACTTATAAACTCACTTGCAACGACACCATCTGCTTTTCCCA	CCACAAAGGGCCGAGTTAAG	AGAGAATCCTCTCGCCATCC	CCACAAAGGGCCGAGTTAAGTCAATATAAACTTATAAACTCACTTGCAACGACACCATCTGCTTTTCCCAAGAGAATCCTCTCGCCATCC
693	TGTGTTGAGAATGAAAAGTAGATGATGTATTTAGATTAGTTCAGTACTTT	CCACAAAGGGCCGAGTTAAG	AGAGAATCCTCTCGCCATCC	CCACAAAGGGCCGAGTTAAGTGTGTTGAGAATGAAAAGTAGATGATGTATTTAGATTAGTTCAGTACTTTAGAGAATCCTCTCGCCATCC
694	AACCAACCAGCAGCATCATGTTCACTACTCCAACAAAATTTACTTCACAA	CCACAAAGGGCCGAGTTAAG	AGAGAATCCTCTCGCCATCC	CCACAAAGGGCCGAGTTAAGAACCAACCAGCAGCATCATGTTCACTACTCCAACAAAATTTACTTCACAAAGAGAATCCTCTCGCCATCC
695	AGAACCAACCTACTGCATCTATTCCATGAAATAAATTACTACGACAACAA	CCACAAAGGGCCGAGTTAAG	AGAGAATCCTCTCGCCATCC	CCACAAAGGGCCGAGTTAAGAGAACCAACCTACTGCATCTATTCCATGAAATAAATTACTACGACAACAAAGAGAATCCTCTCGCCATCC
696	TTATTCGTTCAACAAGAGCTGTGATAACTATTATAACTCTGCTTCTTTGT	CCACAAAGGGCCGAGTTAAG	AGAGAATCCTCTCGCCATCC	CCACAAAGGGCCGAGTTAAGTTATTCGTTCAACAAGAGCTGTGATAACTATTATAACTCTGCTTCTTTGTAGAGAATCCTCTCGCCATCC
697	GTCACCAAACATACATCTAATATTGAGTTACCAATGATAAATTCTGTGAA	CCACAAAGGGCCGAGTTAAG	AGAGAATCCTCTCGCCATCC	CCACAAAGGGCCGAGTTAAGGTCACCAAACATACATCTAATATTGAGTTACCAATGATAAATTCTGTGAAAGAGAATCCTCTCGCCATCC
698	TTTATGTGGTGTCTTTCTGCATGTCACTTCTGAACTTCATGTATTGGATA	CCACAAAGGGCCGAGTTAAG	AGAGAATCCTCTCGCCATCC	CCACAAAGGGCCGAGTTAAGTTTATGTGGTGTCTTTCTGCATGTCACTTCTGAACTTCATGTATTGGATAAGAGAATCCTCTCGCCATCC
699	TAGGCCATATTCAATCAACTTCAGGAGAGAAAGCTTCTGTTTTGCTATCA	CCACAAAGGGCCGAGTTAAG	AGAGAATCCTCTCGCCATCC	CCACAAAGGGCCGAGTTAAGTAGGCCATATTCAATCAACTTCAGGAGAGAAAGCTTCTGTTTTGCTATCAAGAGAATCCTCTCGCCATCC
700	AAATTAGGAAACAAAATACATTAATGGATGATCGAGAGAAGATAACTTAT	CCACAAAGGGCCGAGTTAAG	AGAGAATCCTCTCGCCATCC	CCACAAAGGGCCGAGTTAAGAAATTAGGAAACAAAATACATTAATGGATGATCGAGAGAAGATAACTTATAGAGAATCCTCTCGCCATCC
701	AATACATGAGATTTCAGGGTATAGTGTAAGAGAGAATGTTAAATTGATAA	CCACAAAGGGCCGAGTTAAG	AGAGAATCCTCTCGCCATCC	CCACAAAGGGCCGAGTTAAGAATACATGAGATTTCAGGGTATAGTGTAAGAGAGAATGTTAAATTGATAAAGAGAATCCTCTCGCCATCC
702	TGAAACCCAAAAGAGTAATAACATGAAAATATTTGTCCAAATGCGGAAAA	CCACAAAGGGCCGAGTTAAG	AGAGAATCCTCTCGCCATCC	CCACAAAGGGCCGAGTTAAGTGAAACCCAAAAGAGTAATAACATGAAAATATTTGTCCAAATGCGGAAAAAGAGAATCCTCTCGCCATCC
703	TATTCAATACATAATACTATTAATATTTACAGTGTATGCTATATAGGTGA	CCACAAAGGGCCGAGTTAAG	AGAGAATCCTCTCGCCATCC	CCACAAAGGGCCGAGTTAAGTATTCAATACATAATACTATTAATATTTACAGTGTATGCTATATAGGTGAAGAGAATCCTCTCGCCATCC
704	TTATATTTGGTACTATATAGTTGTTATTGAATGCATGAGATATTTTAAGA	CCACAAAGGGCCGAGTTAAG	AGAGAATCCTCTCGCCATCC	CCACAAAGGGCCGAGTTAAGTTATATTTGGTACTATATAGTTGTTATTGAATGCATGAGATATTTTAAGAAGAGAATCCTCTCGCCATCC
705	GATCCTTGATAGAATGTCATTAATTTTGAAACAATGGAGTGATTATTTAT	CCACAAAGGGCCGAGTTAAG	AGAGAATCCTCTCGCCATCC	CCACAAAGGGCCGAGTTAAGGATCCTTGATAGAATGTCATTAATTTTGAAACAATGGAGTGATTATTTATAGAGAATCCTCTCGCCATCC
706	TTTTACTAATTCTGATTCGGCTTAAGTTGTACCCATAAAATTTCTGTAGG	CCACAAAGGGCCGAGTTAAG	AGAGAATCCTCTCGCCATCC	CCACAAAGGGCCGAGTTAAGTTTTACTAATTCTGATTCGGCTTAAGTTGTACCCATAAAATTTCTGTAGGAGAGAATCCTCTCGCCATCC
707	TTAGCATATATTTTATATTTCTACGAAATAAATTTGTATGCATATTAAAA	CCACAAAGGGCCGAGTTAAG	AGAGAATCCTCTCGCCATCC	CCACAAAGGGCCGAGTTAAGTTAGCATATATTTTATATTTCTACGAAATAAATTTGTATGCATATTAAAAAGAGAATCCTCTCGCCATCC
708	AATTTGTCAAACTCAAAAGTTTCATCAAGCTATCTTTATTAGTTAGTTAA	CCACAAAGGGCCGAGTTAAG	AGAGAATCCTCTCGCCATCC	CCACAAAGGGCCGAGTTAAGAATTTGTCAAACTCAAAAGTTTCATCAAGCTATCTTTATTAGTTAGTTAAAGAGAATCCTCTCGCCATCC
709	TGATTACGACTCCCCAACTAACCTTTAAATGGAAACAATAAAATCAATTT	CCACAAAGGGCCGAGTTAAG	AGAGAATCCTCTCGCCATCC	CCACAAAGGGCCGAGTTAAGTGATTACGACTCCCCAACTAACCTTTAAATGGAAACAATAAAATCAATTTAGAGAATCCTCTCGCCATCC
710	CCCTGATTAAAAGATTTGATTTTAACTTGGTTATTTAACTAATTCACTAA	CCACAAAGGGCCGAGTTAAG	AGAGAATCCTCTCGCCATCC	CCACAAAGGGCCGAGTTAAGCCCTGATTAAAAGATTTGATTTTAACTTGGTTATTTAACTAATTCACTAAAGAGAATCCTCTCGCCATCC
711	TACAAGTTGTGCTAAAAGAAGAAGGGAAGAAAATATACAATTAGGAGGTA	CCACAAAGGGCCGAGTTAAG	AGAGAATCCTCTCGCCATCC	CCACAAAGGGCCGAGTTAAGTACAAGTTGTGCTAAAAGAAGAAGGGAAGAAAATATACAATTAGGAGGTAAGAGAATCCTCTCGCCATCC
712	AATGGTAAGATTACGTTTTCTTTATTTATGTATCATTTTATAAGATTAAA	CCACAAAGGGCCGAGTTAAG	AGAGAATCCTCTCGCCATCC	CCACAAAGGGCCGAGTTAAGAATGGTAAGATTACGTTTTCTTTATTTATGTATCATTTTATAAGATTAAAAGAGAATCCTCTCGCCATCC
713	GGTAAATAATTGGGCCTAACTCTCAAGACAAGAACTTCCCTACAATATAA	CCACAAAGGGCCGAGTTAAG	AGAGAATCCTCTCGCCATCC	CCACAAAGGGCCGAGTTAAGGGTAAATAATTGGGCCTAACTCTCAAGACAAGAACTTCCCTACAATATAAAGAGAATCCTCTCGCCATCC
714	ATTGGAGTTGAGATATTATTTTCTGCTTCTTTCTTGTTGCTCCGGTTCTT	CCACAAAGGGCCGAGTTAAG	AGAGAATCCTCTCGCCATCC	CCACAAAGGGCCGAGTTAAGATTGGAGTTGAGATATTATTTTCTGCTTCTTTCTTGTTGCTCCGGTTCTTAGAGAATCCTCTCGCCATCC
715	GCTGCTGAAGTTTTAAGATATTGCCTTTATGAAATATTAGTAATTCACAT	CCACAAAGGGCCGAGTTAAG	AGAGAATCCTCTCGCCATCC	CCACAAAGGGCCGAGTTAAGGCTGCTGAAGTTTTAAGATATTGCCTTTATGAAATATTAGTAATTCACATAGAGAATCCTCTCGCCATCC
716	AATAGCCTTCATGTTGATCCCAAACCCTTTCAATCACTGAGGTAGAAGAA	CCACAAAGGGCCGAGTTAAG	AGAGAATCCTCTCGCCATCC	CCACAAAGGGCCGAGTTAAGAATAGCCTTCATGTTGATCCCAAACCCTTTCAATCACTGAGGTAGAAGAAAGAGAATCCTCTCGCCATCC
717	ATATGCTGGATATAAACAAACACACACTACTGATTTCACCCCTCTCCTCG	CCACAAAGGGCCGAGTTAAG	AGAGAATCCTCTCGCCATCC	CCACAAAGGGCCGAGTTAAGATATGCTGGATATAAACAAACACACACTACTGATTTCACCCCTCTCCTCGAGAGAATCCTCTCGCCATCC
718	GTTTTGCGGAATTAAGACTTGAGATGTTCTTAGTTACTATTTCATCAGTA	CCACAAAGGGCCGAGTTAAG	AGAGAATCCTCTCGCCATCC	CCACAAAGGGCCGAGTTAAGGTTTTGCGGAATTAAGACTTGAGATGTTCTTAGTTACTATTTCATCAGTAAGAGAATCCTCTCGCCATCC
719	AAGGATCAATTTTGTGCTGGTAAGAAAAGTTTTATACCTATGGAGTACTT	CCACAAAGGGCCGAGTTAAG	AGAGAATCCTCTCGCCATCC	CCACAAAGGGCCGAGTTAAGAAGGATCAATTTTGTGCTGGTAAGAAAAGTTTTATACCTATGGAGTACTTAGAGAATCCTCTCGCCATCC
720	TTCCCTCTATCTTATTTTAAGTGTAAGGTTTCAATTAACTGTAAATAAAA	CCACAAAGGGCCGAGTTAAG	AGAGAATCCTCTCGCCATCC	CCACAAAGGGCCGAGTTAAGTTCCCTCTATCTTATTTTAAGTGTAAGGTTTCAATTAACTGTAAATAAAAAGAGAATCCTCTCGCCATCC
721	AAGCATTTAATTTAAGTATTGGCTAGTTCTCATGGATACTTTAAGAAAGG	CCACAAAGGGCCGAGTTAAG	AGAGAATCCTCTCGCCATCC	CCACAAAGGGCCGAGTTAAGAAGCATTTAATTTAAGTATTGGCTAGTTCTCATGGATACTTTAAGAAAGGAGAGAATCCTCTCGCCATCC
722	TTGGCCTTTATAAAATTGTAGCTATGATTCTGTTGTCACTCCATTATTTG	CCACAAAGGGCCGAGTTAAG	AGAGAATCCTCTCGCCATCC	CCACAAAGGGCCGAGTTAAGTTGGCCTTTATAAAATTGTAGCTATGATTCTGTTGTCACTCCATTATTTGAGAGAATCCTCTCGCCATCC
723	GTAAACCATAACATAGCATTAGGAGGGGAGACGAAACCACAGTAACAGAC	CCACAAAGGGCCGAGTTAAG	AGAGAATCCTCTCGCCATCC	CCACAAAGGGCCGAGTTAAGGTAAACCATAACATAGCATTAGGAGGGGAGACGAAACCACAGTAACAGACAGAGAATCCTCTCGCCATCC
724	AATTCTTGAAACCAACTCCATCATGGCTCTTTGAATCTACCTCAGCTTGA	CCACAAAGGGCCGAGTTAAG	AGAGAATCCTCTCGCCATCC	CCACAAAGGGCCGAGTTAAGAATTCTTGAAACCAACTCCATCATGGCTCTTTGAATCTACCTCAGCTTGAAGAGAATCCTCTCGCCATCC
725	TTTTCAATCTTGTTCATATTTCTATCTCCCATCTCTAGTAGGTTGTACAG	CCACAAAGGGCCGAGTTAAG	AGAGAATCCTCTCGCCATCC	CCACAAAGGGCCGAGTTAAGTTTTCAATCTTGTTCATATTTCTATCTCCCATCTCTAGTAGGTTGTACAGAGAGAATCCTCTCGCCATCC
726	GTACTGTTTAGATTACTTTTGACAATAGAGATTCTTTTATCAATTTGGAA	CCACAAAGGGCCGAGTTAAG	AGAGAATCCTCTCGCCATCC	CCACAAAGGGCCGAGTTAAGGTACTGTTTAGATTACTTTTGACAATAGAGATTCTTTTATCAATTTGGAAAGAGAATCCTCTCGCCATCC
727	GTCGGGCACTGTTTGTCAAAATTTTAGGCAAATCGCTCAGTTTCCGAGTG	CCACAAAGGGCCGAGTTAAG	AGAGAATCCTCTCGCCATCC	CCACAAAGGGCCGAGTTAAGGTCGGGCACTGTTTGTCAAAATTTTAGGCAAATCGCTCAGTTTCCGAGTGAGAGAATCCTCTCGCCATCC
728	AGCTGAATCTGAATAACCCTCTCCCGCCTAATGTCATGGTGCTGGGTAGG	CCACAAAGGGCCGAGTTAAG	AGAGAATCCTCTCGCCATCC	CCACAAAGGGCCGAGTTAAGAGCTGAATCTGAATAACCCTCTCCCGCCTAATGTCATGGTGCTGGGTAGGAGAGAATCCTCTCGCCATCC
729	CAAACTTTCGATTTATGGTTATTCATCTTTTGTCCTGATTCACCACAAAA	CCACAAAGGGCCGAGTTAAG	AGAGAATCCTCTCGCCATCC	CCACAAAGGGCCGAGTTAAGCAAACTTTCGATTTATGGTTATTCATCTTTTGTCCTGATTCACCACAAAAAGAGAATCCTCTCGCCATCC
730	TGCTGCACCCTCTCCACTACATATCGGTAAGTATGGCTGGTTACTCTCCC	CCACAAAGGGCCGAGTTAAG	AGAGAATCCTCTCGCCATCC	CCACAAAGGGCCGAGTTAAGTGCTGCACCCTCTCCACTACATATCGGTAAGTATGGCTGGTTACTCTCCCAGAGAATCCTCTCGCCATCC
731	TATTATTTTCATTTCTTAGTGGAGAATATCATTGTTTATCCTCGTTTCTC	CCACAAAGGGCCGAGTTAAG	AGAGAATCCTCTCGCCATCC	CCACAAAGGGCCGAGTTAAGTATTATTTTCATTTCTTAGTGGAGAATATCATTGTTTATCCTCGTTTCTCAGAGAATCCTCTCGCCATCC
732	TGATTGTAACAATCTCCCATAGTGAATTTCTTCTGTGGCCTTAGTTGCCC	CCACAAAGGGCCGAGTTAAG	AGAGAATCCTCTCGCCATCC	CCACAAAGGGCCGAGTTAAGTGATTGTAACAATCTCCCATAGTGAATTTCTTCTGTGGCCTTAGTTGCCCAGAGAATCCTCTCGCCATCC
733	ACTTTGATGACAGAAGAATAGAGAATCATCGTTGCAACACTTATTCACAA	CCACAAAGGGCCGAGTTAAG	AGAGAATCCTCTCGCCATCC	CCACAAAGGGCCGAGTTAAGACTTTGATGACAGAAGAATAGAGAATCATCGTTGCAACACTTATTCACAAAGAGAATCCTCTCGCCATCC
734	AAGGATTCTATTTGAGTTCATATCTTTGTAGTGGTAATGGTATTAAGCGA	CCACAAAGGGCCGAGTTAAG	AGAGAATCCTCTCGCCATCC	CCACAAAGGGCCGAGTTAAGAAGGATTCTATTTGAGTTCATATCTTTGTAGTGGTAATGGTATTAAGCGAAGAGAATCCTCTCGCCATCC
735	GCATCTGTCAGGCTGCCATCTTTCCTTATGAAACCTTGCAAGATATTGTG	CCACAAAGGGCCGAGTTAAG	AGAGAATCCTCTCGCCATCC	CCACAAAGGGCCGAGTTAAGGCATCTGTCAGGCTGCCATCTTTCCTTATGAAACCTTGCAAGATATTGTGAGAGAATCCTCTCGCCATCC
736	GAGAGAAACTGACCAACCAAAGCCTCTTATTTATTCAATTCTTCGCTGTT	CCACAAAGGGCCGAGTTAAG	AGAGAATCCTCTCGCCATCC	CCACAAAGGGCCGAGTTAAGGAGAGAAACTGACCAACCAAAGCCTCTTATTTATTCAATTCTTCGCTGTTAGAGAATCCTCTCGCCATCC
737	ATTACAGCTGATTAATTGAATTTGTTTCTTGTCATTTCCACATGTCCATC	CCACAAAGGGCCGAGTTAAG	AGAGAATCCTCTCGCCATCC	CCACAAAGGGCCGAGTTAAGATTACAGCTGATTAATTGAATTTGTTTCTTGTCATTTCCACATGTCCATCAGAGAATCCTCTCGCCATCC
738	ATATAGATTAATTCAAATATCAGTTTAATGTAGTTTAATGTTGTGGAGTC	CCACAAAGGGCCGAGTTAAG	AGAGAATCCTCTCGCCATCC	CCACAAAGGGCCGAGTTAAGATATAGATTAATTCAAATATCAGTTTAATGTAGTTTAATGTTGTGGAGTCAGAGAATCCTCTCGCCATCC
739	TTCAAAAGAACCACTGAGATAGAAAGATATTCAGCGAGCCCTATAAAAGC	CCACAAAGGGCCGAGTTAAG	AGAGAATCCTCTCGCCATCC	CCACAAAGGGCCGAGTTAAGTTCAAAAGAACCACTGAGATAGAAAGATATTCAGCGAGCCCTATAAAAGCAGAGAATCCTCTCGCCATCC
740	TGTTAGAAAACCTAGCACAATGTCAATGACCTAGTTTTATTTGATTTTCA	CCACAAAGGGCCGAGTTAAG	AGAGAATCCTCTCGCCATCC	CCACAAAGGGCCGAGTTAAGTGTTAGAAAACCTAGCACAATGTCAATGACCTAGTTTTATTTGATTTTCAAGAGAATCCTCTCGCCATCC
741	TCCACCATTCCACACCCATAGCAGAAATCGGACAATCTTTCATACTTAAA	CCACAAAGGGCCGAGTTAAG	AGAGAATCCTCTCGCCATCC	CCACAAAGGGCCGAGTTAAGTCCACCATTCCACACCCATAGCAGAAATCGGACAATCTTTCATACTTAAAAGAGAATCCTCTCGCCATCC
742	TCCACTCGGATCACAAACCCCTTTTATTGGAGGAAAACCCGAGCATGGAT	CCACAAAGGGCCGAGTTAAG	AGAGAATCCTCTCGCCATCC	CCACAAAGGGCCGAGTTAAGTCCACTCGGATCACAAACCCCTTTTATTGGAGGAAAACCCGAGCATGGATAGAGAATCCTCTCGCCATCC
743	ATGCATCTGAAATGATATGATTTGTGTCAGGATGAGAGATCCACATTGAC	CCACAAAGGGCCGAGTTAAG	AGAGAATCCTCTCGCCATCC	CCACAAAGGGCCGAGTTAAGATGCATCTGAAATGATATGATTTGTGTCAGGATGAGAGATCCACATTGACAGAGAATCCTCTCGCCATCC
744	GGTTCAAAGAATCTTATAGCCACAACCTTTACTTGAAGTCATGGCAATCT	CCACAAAGGGCCGAGTTAAG	AGAGAATCCTCTCGCCATCC	CCACAAAGGGCCGAGTTAAGGGTTCAAAGAATCTTATAGCCACAACCTTTACTTGAAGTCATGGCAATCTAGAGAATCCTCTCGCCATCC
745	TAGTTTAATCCACAAAATAGTCTCCAAGTGCTGAAACCTATCCAACCTTA	CCACAAAGGGCCGAGTTAAG	AGAGAATCCTCTCGCCATCC	CCACAAAGGGCCGAGTTAAGTAGTTTAATCCACAAAATAGTCTCCAAGTGCTGAAACCTATCCAACCTTAAGAGAATCCTCTCGCCATCC
746	TGGACAGTTCTGATAGATTTAATATGCTGGTTTTCTTTGTTTCTCTGACT	CCACAAAGGGCCGAGTTAAG	AGAGAATCCTCTCGCCATCC	CCACAAAGGGCCGAGTTAAGTGGACAGTTCTGATAGATTTAATATGCTGGTTTTCTTTGTTTCTCTGACTAGAGAATCCTCTCGCCATCC
747	TTGTGAACTCTCGACCTGTGTTTGGAGCAGTTGTGGATAGATGGAATCCC	CCACAAAGGGCCGAGTTAAG	AGAGAATCCTCTCGCCATCC	CCACAAAGGGCCGAGTTAAGTTGTGAACTCTCGACCTGTGTTTGGAGCAGTTGTGGATAGATGGAATCCCAGAGAATCCTCTCGCCATCC
748	GGGATTGAAGAAATTAGGAATAGGGAGAAAGATGGGCGATGGTGTAAGTA	CCACAAAGGGCCGAGTTAAG	AGAGAATCCTCTCGCCATCC	CCACAAAGGGCCGAGTTAAGGGGATTGAAGAAATTAGGAATAGGGAGAAAGATGGGCGATGGTGTAAGTAAGAGAATCCTCTCGCCATCC
749	AGCCTTCTCTTTTCTTCTCCTACCCGCTTGCCGACTTTTGACAAACCAAC	CCACAAAGGGCCGAGTTAAG	AGAGAATCCTCTCGCCATCC	CCACAAAGGGCCGAGTTAAGAGCCTTCTCTTTTCTTCTCCTACCCGCTTGCCGACTTTTGACAAACCAACAGAGAATCCTCTCGCCATCC
750	AGTATATTGAATCAAATATTTATAGGAAATATAGCTTCTTGGAGTATACC	CCACAAAGGGCCGAGTTAAG	AGAGAATCCTCTCGCCATCC	CCACAAAGGGCCGAGTTAAGAGTATATTGAATCAAATATTTATAGGAAATATAGCTTCTTGGAGTATACCAGAGAATCCTCTCGCCATCC
751	CTTCTTATCCATGGTGAACTTTCTCATTCCAACATACGTGCATGCAGACA	CCACAAAGGGCCGAGTTAAG	AGAGAATCCTCTCGCCATCC	CCACAAAGGGCCGAGTTAAGCTTCTTATCCATGGTGAACTTTCTCATTCCAACATACGTGCATGCAGACAAGAGAATCCTCTCGCCATCC
752	ATATCATTAGCTAGTGCAGGCTTGGCTTTTGGAATGGTTGTATAGTTTCT	CCACAAAGGGCCGAGTTAAG	AGAGAATCCTCTCGCCATCC	CCACAAAGGGCCGAGTTAAGATATCATTAGCTAGTGCAGGCTTGGCTTTTGGAATGGTTGTATAGTTTCTAGAGAATCCTCTCGCCATCC
753	TTTTGAAGAAGCTGCTTATCTCAAATGTACTCAAAGAACTCCCAAGTCAT	CCACAAAGGGCCGAGTTAAG	AGAGAATCCTCTCGCCATCC	CCACAAAGGGCCGAGTTAAGTTTTGAAGAAGCTGCTTATCTCAAATGTACTCAAAGAACTCCCAAGTCATAGAGAATCCTCTCGCCATCC
754	CCTCTTCTTATCGTAGAAAGGAGTACGTTGCATACCTCTTCTTCTTATTG	CCACAAAGGGCCGAGTTAAG	AGAGAATCCTCTCGCCATCC	CCACAAAGGGCCGAGTTAAGCCTCTTCTTATCGTAGAAAGGAGTACGTTGCATACCTCTTCTTCTTATTGAGAGAATCCTCTCGCCATCC
755	GTGAAAAGAGGTTCGCTGGCTTAAACAAGGATAGGAAGCAACTAGATCCA	CCACAAAGGGCCGAGTTAAG	AGAGAATCCTCTCGCCATCC	CCACAAAGGGCCGAGTTAAGGTGAAAAGAGGTTCGCTGGCTTAAACAAGGATAGGAAGCAACTAGATCCAAGAGAATCCTCTCGCCATCC
756	TCTGGATCTACTGATATAGCAGCAAGTATGGAGAACTCCGACATTTTCCC	CCACAAAGGGCCGAGTTAAG	AGAGAATCCTCTCGCCATCC	CCACAAAGGGCCGAGTTAAGTCTGGATCTACTGATATAGCAGCAAGTATGGAGAACTCCGACATTTTCCCAGAGAATCCTCTCGCCATCC
757	AGGGAATGCTTTACTAAAACAAGGTGTTAATTTATATGTGTTTGGTGTTT	CCACAAAGGGCCGAGTTAAG	AGAGAATCCTCTCGCCATCC	CCACAAAGGGCCGAGTTAAGAGGGAATGCTTTACTAAAACAAGGTGTTAATTTATATGTGTTTGGTGTTTAGAGAATCCTCTCGCCATCC
758	ACCATGAATTGGTTATCTAAAAGCTTCCAATCCTTATTCAGATGGAGAGC	CCACAAAGGGCCGAGTTAAG	AGAGAATCCTCTCGCCATCC	CCACAAAGGGCCGAGTTAAGACCATGAATTGGTTATCTAAAAGCTTCCAATCCTTATTCAGATGGAGAGCAGAGAATCCTCTCGCCATCC
759	TGATTGGTTATTGGTTAGTATCGAATCATTTATCTCGTGTAGCATTAATA	CCACAAAGGGCCGAGTTAAG	AGAGAATCCTCTCGCCATCC	CCACAAAGGGCCGAGTTAAGTGATTGGTTATTGGTTAGTATCGAATCATTTATCTCGTGTAGCATTAATAAGAGAATCCTCTCGCCATCC
760	GTTAGCTATCAGAGACACTATCGGTCCAATTCGTTATAGTTTCAATTACC	CCACAAAGGGCCGAGTTAAG	AGAGAATCCTCTCGCCATCC	CCACAAAGGGCCGAGTTAAGGTTAGCTATCAGAGACACTATCGGTCCAATTCGTTATAGTTTCAATTACCAGAGAATCCTCTCGCCATCC
761	CTACTGCTTAGTCGTTCTTCACCGAAAAGTGTTAGCACAGCAGAGTAATG	CCACAAAGGGCCGAGTTAAG	AGAGAATCCTCTCGCCATCC	CCACAAAGGGCCGAGTTAAGCTACTGCTTAGTCGTTCTTCACCGAAAAGTGTTAGCACAGCAGAGTAATGAGAGAATCCTCTCGCCATCC
762	ATTAATCAATAATTATCTTACTCACAATCTTAAAATATTATTCTTTGAGA	CCACAAAGGGCCGAGTTAAG	AGAGAATCCTCTCGCCATCC	CCACAAAGGGCCGAGTTAAGATTAATCAATAATTATCTTACTCACAATCTTAAAATATTATTCTTTGAGAAGAGAATCCTCTCGCCATCC
763	CTGAATCTTACCCCTCATTTCCCAAACACCCAACTCGAGAAAGGACAAAA	CCACAAAGGGCCGAGTTAAG	AGAGAATCCTCTCGCCATCC	CCACAAAGGGCCGAGTTAAGCTGAATCTTACCCCTCATTTCCCAAACACCCAACTCGAGAAAGGACAAAAAGAGAATCCTCTCGCCATCC
764	GCACTTGAATCACCTGACTATTGATTGGAGCTTTTGATTGCTTTCTTTTG	CCACAAAGGGCCGAGTTAAG	AGAGAATCCTCTCGCCATCC	CCACAAAGGGCCGAGTTAAGGCACTTGAATCACCTGACTATTGATTGGAGCTTTTGATTGCTTTCTTTTGAGAGAATCCTCTCGCCATCC
765	TTTCTTTCTTCTTGAGGACTAATAGGTATAGGAATACTTAAAATAGAGGA	CCACAAAGGGCCGAGTTAAG	AGAGAATCCTCTCGCCATCC	CCACAAAGGGCCGAGTTAAGTTTCTTTCTTCTTGAGGACTAATAGGTATAGGAATACTTAAAATAGAGGAAGAGAATCCTCTCGCCATCC
766	CCTGAAAATTCACACAAAACACCAGTCAGTAGCTTCATTATCAATAACAA	CCACAAAGGGCCGAGTTAAG	AGAGAATCCTCTCGCCATCC	CCACAAAGGGCCGAGTTAAGCCTGAAAATTCACACAAAACACCAGTCAGTAGCTTCATTATCAATAACAAAGAGAATCCTCTCGCCATCC
767	GGGTTTAAGGGAGAAAAGAGCTTGTTTGAGTTCAGAGATATCAATCGGTT	CCACAAAGGGCCGAGTTAAG	AGAGAATCCTCTCGCCATCC	CCACAAAGGGCCGAGTTAAGGGGTTTAAGGGAGAAAAGAGCTTGTTTGAGTTCAGAGATATCAATCGGTTAGAGAATCCTCTCGCCATCC
768	AAAGCCATTGATCTTGACTAGTTTTAAGACCTAAGATTTTGTTAGATCTA	CCACAAAGGGCCGAGTTAAG	AGAGAATCCTCTCGCCATCC	CCACAAAGGGCCGAGTTAAGAAAGCCATTGATCTTGACTAGTTTTAAGACCTAAGATTTTGTTAGATCTAAGAGAATCCTCTCGCCATCC
769	ATTTGAGTTTCCAGAAATTTTCTTCTTGCTTAAGGATTACACAATAATCT	CCACAAAGGGCCGAGTTAAG	AGAGAATCCTCTCGCCATCC	CCACAAAGGGCCGAGTTAAGATTTGAGTTTCCAGAAATTTTCTTCTTGCTTAAGGATTACACAATAATCTAGAGAATCCTCTCGCCATCC
770	GCTCAAACCGTGAATCTGGAAAAGAGGACATCTATAACTCCCCAAATAAG	CCACAAAGGGCCGAGTTAAG	AGAGAATCCTCTCGCCATCC	CCACAAAGGGCCGAGTTAAGGCTCAAACCGTGAATCTGGAAAAGAGGACATCTATAACTCCCCAAATAAGAGAGAATCCTCTCGCCATCC
771	ACTCAGCCACACAAAACTCACAAATACTAAACCCACATTTTCAGAACACT	CCACAAAGGGCCGAGTTAAG	AGAGAATCCTCTCGCCATCC	CCACAAAGGGCCGAGTTAAGACTCAGCCACACAAAACTCACAAATACTAAACCCACATTTTCAGAACACTAGAGAATCCTCTCGCCATCC
772	GTTTCATAATGTGTTCAGTGCTTATGAGAGAGAATCAATAAGTATTTCCA	CCACAAAGGGCCGAGTTAAG	AGAGAATCCTCTCGCCATCC	CCACAAAGGGCCGAGTTAAGGTTTCATAATGTGTTCAGTGCTTATGAGAGAGAATCAATAAGTATTTCCAAGAGAATCCTCTCGCCATCC
773	AGCAAAACTTATTCCAGATGTATTGTAAAACCCAAAATCAGTGTGCTTGC	CCACAAAGGGCCGAGTTAAG	AGAGAATCCTCTCGCCATCC	CCACAAAGGGCCGAGTTAAGAGCAAAACTTATTCCAGATGTATTGTAAAACCCAAAATCAGTGTGCTTGCAGAGAATCCTCTCGCCATCC
774	TTTTATCACCTGGTGCTGATTATCGAGTGATATGAAGAACATGTCTTGAA	CCACAAAGGGCCGAGTTAAG	AGAGAATCCTCTCGCCATCC	CCACAAAGGGCCGAGTTAAGTTTTATCACCTGGTGCTGATTATCGAGTGATATGAAGAACATGTCTTGAAAGAGAATCCTCTCGCCATCC
775	TCCTCTCAATCTGCATCTTTCACTTCAGCTTCAACATCAACAACACCTAC	CCACAAAGGGCCGAGTTAAG	AGAGAATCCTCTCGCCATCC	CCACAAAGGGCCGAGTTAAGTCCTCTCAATCTGCATCTTTCACTTCAGCTTCAACATCAACAACACCTACAGAGAATCCTCTCGCCATCC
776	TAAATTATAGCAATGCTGTCAAGATCATTAGGCAACAACACAAGGTCCAT	CCACAAAGGGCCGAGTTAAG	AGAGAATCCTCTCGCCATCC	CCACAAAGGGCCGAGTTAAGTAAATTATAGCAATGCTGTCAAGATCATTAGGCAACAACACAAGGTCCATAGAGAATCCTCTCGCCATCC
777	TTTTACAAGAGCGAAAGGTGAATATTTATGTAAAAGGAGGTTCAAGAAAG	CCACAAAGGGCCGAGTTAAG	AGAGAATCCTCTCGCCATCC	CCACAAAGGGCCGAGTTAAGTTTTACAAGAGCGAAAGGTGAATATTTATGTAAAAGGAGGTTCAAGAAAGAGAGAATCCTCTCGCCATCC
778	TATATAATTTTAATTCAAGAAATTCTGTGGCCTATAATTCAAAATATTCC	CCACAAAGGGCCGAGTTAAG	AGAGAATCCTCTCGCCATCC	CCACAAAGGGCCGAGTTAAGTATATAATTTTAATTCAAGAAATTCTGTGGCCTATAATTCAAAATATTCCAGAGAATCCTCTCGCCATCC
779	ATCTAATAATATTCGAAGTTGTAACGACTTATTCAAAGGGTAATTAATTT	CCACAAAGGGCCGAGTTAAG	AGAGAATCCTCTCGCCATCC	CCACAAAGGGCCGAGTTAAGATCTAATAATATTCGAAGTTGTAACGACTTATTCAAAGGGTAATTAATTTAGAGAATCCTCTCGCCATCC
780	ATACAATTGATCAAGGAGAGGAGGTATCAAGATCCGATATGATCAAGGAG	CCACAAAGGGCCGAGTTAAG	AGAGAATCCTCTCGCCATCC	CCACAAAGGGCCGAGTTAAGATACAATTGATCAAGGAGAGGAGGTATCAAGATCCGATATGATCAAGGAGAGAGAATCCTCTCGCCATCC
781	CTGCCAAACAAACTGCAACCAAAATTTAACTTGTTAATGGAGGGATCATA	CCACAAAGGGCCGAGTTAAG	AGAGAATCCTCTCGCCATCC	CCACAAAGGGCCGAGTTAAGCTGCCAAACAAACTGCAACCAAAATTTAACTTGTTAATGGAGGGATCATAAGAGAATCCTCTCGCCATCC
782	CAACATTTGACTTGGTTGCTCGACATAGTGCACGATACAGTGAAGCAAGT	CCACAAAGGGCCGAGTTAAG	AGAGAATCCTCTCGCCATCC	CCACAAAGGGCCGAGTTAAGCAACATTTGACTTGGTTGCTCGACATAGTGCACGATACAGTGAAGCAAGTAGAGAATCCTCTCGCCATCC
783	CTGGATGTAATTCATGGCTGGCTCCGCGATCCACTGCTACTTTGATGCCT	CCACAAAGGGCCGAGTTAAG	AGAGAATCCTCTCGCCATCC	CCACAAAGGGCCGAGTTAAGCTGGATGTAATTCATGGCTGGCTCCGCGATCCACTGCTACTTTGATGCCTAGAGAATCCTCTCGCCATCC
784	GTAACAAAGTAGATTCAACTTGCAGTAACTCATATTAGCAGTTCTTTCAG	CCACAAAGGGCCGAGTTAAG	AGAGAATCCTCTCGCCATCC	CCACAAAGGGCCGAGTTAAGGTAACAAAGTAGATTCAACTTGCAGTAACTCATATTAGCAGTTCTTTCAGAGAGAATCCTCTCGCCATCC
785	TGATTGCTCATAAACAGTAGCCCTTTCAATGTTGGTTAATAGAAAACTAC	CCACAAAGGGCCGAGTTAAG	AGAGAATCCTCTCGCCATCC	CCACAAAGGGCCGAGTTAAGTGATTGCTCATAAACAGTAGCCCTTTCAATGTTGGTTAATAGAAAACTACAGAGAATCCTCTCGCCATCC
786	ATGTCATAATTATTACGCATAGGGAGTAGAAAAGAAAGGCTCACACTTTA	CCACAAAGGGCCGAGTTAAG	AGAGAATCCTCTCGCCATCC	CCACAAAGGGCCGAGTTAAGATGTCATAATTATTACGCATAGGGAGTAGAAAAGAAAGGCTCACACTTTAAGAGAATCCTCTCGCCATCC
787	AGTTGACAGCTTGAGGAAAACAGTTGATGACCTACAGAGAAGTCAAGGTG	CCACAAAGGGCCGAGTTAAG	AGAGAATCCTCTCGCCATCC	CCACAAAGGGCCGAGTTAAGAGTTGACAGCTTGAGGAAAACAGTTGATGACCTACAGAGAAGTCAAGGTGAGAGAATCCTCTCGCCATCC
788	GTTAATAATATAGACGTGATTTCCTTTATGAGTTTTGGAGGGAACCCTAA	CCACAAAGGGCCGAGTTAAG	AGAGAATCCTCTCGCCATCC	CCACAAAGGGCCGAGTTAAGGTTAATAATATAGACGTGATTTCCTTTATGAGTTTTGGAGGGAACCCTAAAGAGAATCCTCTCGCCATCC
789	TTCGTCTGAAATCGTCAATCCAAGCACGGTCTTTGCAAGGTAATGGAAGC	CCACAAAGGGCCGAGTTAAG	AGAGAATCCTCTCGCCATCC	CCACAAAGGGCCGAGTTAAGTTCGTCTGAAATCGTCAATCCAAGCACGGTCTTTGCAAGGTAATGGAAGCAGAGAATCCTCTCGCCATCC
790	TATAAGTATGAATATTTTATAAAACTTTTAAGTGTTGGTCTCTTACTCAA	CCACAAAGGGCCGAGTTAAG	AGAGAATCCTCTCGCCATCC	CCACAAAGGGCCGAGTTAAGTATAAGTATGAATATTTTATAAAACTTTTAAGTGTTGGTCTCTTACTCAAAGAGAATCCTCTCGCCATCC
791	AGGGTCAGCATTACACATACTGTAGATCCCATAAAAGTGAGTTGCCCTCT	CCACAAAGGGCCGAGTTAAG	AGAGAATCCTCTCGCCATCC	CCACAAAGGGCCGAGTTAAGAGGGTCAGCATTACACATACTGTAGATCCCATAAAAGTGAGTTGCCCTCTAGAGAATCCTCTCGCCATCC
792	TTAATCCAAGTTCACTTAAATTTTGCTTGTTTTAGTGTGTCCTTATGAAA	CCACAAAGGGCCGAGTTAAG	AGAGAATCCTCTCGCCATCC	CCACAAAGGGCCGAGTTAAGTTAATCCAAGTTCACTTAAATTTTGCTTGTTTTAGTGTGTCCTTATGAAAAGAGAATCCTCTCGCCATCC
793	AATTTCCATGATTATGAACATAGTGTATCTAATCATTTAGCTGTGATCTC	CCACAAAGGGCCGAGTTAAG	AGAGAATCCTCTCGCCATCC	CCACAAAGGGCCGAGTTAAGAATTTCCATGATTATGAACATAGTGTATCTAATCATTTAGCTGTGATCTCAGAGAATCCTCTCGCCATCC
794	TTCCAGCAACTAGATCAGCTCCCTGTGCATAATTATGTTTAATTTCTCTA	CCACAAAGGGCCGAGTTAAG	AGAGAATCCTCTCGCCATCC	CCACAAAGGGCCGAGTTAAGTTCCAGCAACTAGATCAGCTCCCTGTGCATAATTATGTTTAATTTCTCTAAGAGAATCCTCTCGCCATCC
795	TCTCATTTACACTCAAACTATGACGCCATGAATAACCACATGACCTCTGA	CCACAAAGGGCCGAGTTAAG	AGAGAATCCTCTCGCCATCC	CCACAAAGGGCCGAGTTAAGTCTCATTTACACTCAAACTATGACGCCATGAATAACCACATGACCTCTGAAGAGAATCCTCTCGCCATCC
796	GTCTCAGAGCAACCTTCAGAGCATTCCAGTCAAGCCTTCCATCATCAGTA	CCACAAAGGGCCGAGTTAAG	AGAGAATCCTCTCGCCATCC	CCACAAAGGGCCGAGTTAAGGTCTCAGAGCAACCTTCAGAGCATTCCAGTCAAGCCTTCCATCATCAGTAAGAGAATCCTCTCGCCATCC
797	GAGGAATCAGAAAGTAACTGAAACAATTGTCAAGATTTTCTACGCATCTT	CCACAAAGGGCCGAGTTAAG	AGAGAATCCTCTCGCCATCC	CCACAAAGGGCCGAGTTAAGGAGGAATCAGAAAGTAACTGAAACAATTGTCAAGATTTTCTACGCATCTTAGAGAATCCTCTCGCCATCC
798	AGTTCTCTCGACAGGAGCTATTCATGAAATCACTGGTGGAGTTCTTTGAG	CCACAAAGGGCCGAGTTAAG	AGAGAATCCTCTCGCCATCC	CCACAAAGGGCCGAGTTAAGAGTTCTCTCGACAGGAGCTATTCATGAAATCACTGGTGGAGTTCTTTGAGAGAGAATCCTCTCGCCATCC
799	AAGGAATGATAGAAGCAAATAAAGGGTAAGCTGATTTCTCTACTCTAAGA	CCACAAAGGGCCGAGTTAAG	AGAGAATCCTCTCGCCATCC	CCACAAAGGGCCGAGTTAAGAAGGAATGATAGAAGCAAATAAAGGGTAAGCTGATTTCTCTACTCTAAGAAGAGAATCCTCTCGCCATCC
800	GCAAAGTTAATAATTTCACTAACCACTGTTTTCACATTGAAGGGAAATGA	CCACAAAGGGCCGAGTTAAG	AGAGAATCCTCTCGCCATCC	CCACAAAGGGCCGAGTTAAGGCAAAGTTAATAATTTCACTAACCACTGTTTTCACATTGAAGGGAAATGAAGAGAATCCTCTCGCCATCC
801	CCCATTAGCTTCAGGTGCAGGGCTTTGAACAAATATGACATTTTCTCCAG	CCACAAAGGGCCGAGTTAAG	AGAGAATCCTCTCGCCATCC	CCACAAAGGGCCGAGTTAAGCCCATTAGCTTCAGGTGCAGGGCTTTGAACAAATATGACATTTTCTCCAGAGAGAATCCTCTCGCCATCC
802	GAATGCATTTCTTCCTAAGTTAGCATCTTCTTAACCTTTATGCATGGCTA	CCACAAAGGGCCGAGTTAAG	AGAGAATCCTCTCGCCATCC	CCACAAAGGGCCGAGTTAAGGAATGCATTTCTTCCTAAGTTAGCATCTTCTTAACCTTTATGCATGGCTAAGAGAATCCTCTCGCCATCC
803	TAACAGTTTCTTTTATTTGCACTTTTGAGATCCATGACCTAACGTTATCT	CCACAAAGGGCCGAGTTAAG	AGAGAATCCTCTCGCCATCC	CCACAAAGGGCCGAGTTAAGTAACAGTTTCTTTTATTTGCACTTTTGAGATCCATGACCTAACGTTATCTAGAGAATCCTCTCGCCATCC
804	GAAGTCTGGTTTTGTTTAATTCCTGTTTAGTTTAGTGAATTACAAGAGAG	CCACAAAGGGCCGAGTTAAG	AGAGAATCCTCTCGCCATCC	CCACAAAGGGCCGAGTTAAGGAAGTCTGGTTTTGTTTAATTCCTGTTTAGTTTAGTGAATTACAAGAGAGAGAGAATCCTCTCGCCATCC
805	ACCATTTCTATATTGCTTGTGTAAGTTCAATATACATATACACAAAATGG	CCACAAAGGGCCGAGTTAAG	AGAGAATCCTCTCGCCATCC	CCACAAAGGGCCGAGTTAAGACCATTTCTATATTGCTTGTGTAAGTTCAATATACATATACACAAAATGGAGAGAATCCTCTCGCCATCC
806	TCCTTTACAATTCATATAGTTCATCATTGAGAGAGACCTATTTGTCAACT	CCACAAAGGGCCGAGTTAAG	AGAGAATCCTCTCGCCATCC	CCACAAAGGGCCGAGTTAAGTCCTTTACAATTCATATAGTTCATCATTGAGAGAGACCTATTTGTCAACTAGAGAATCCTCTCGCCATCC
807	GCAGAGTCATCACCTCCTACCCAACGACCAAGTTATAAGTACAAAGGGTC	CCACAAAGGGCCGAGTTAAG	AGAGAATCCTCTCGCCATCC	CCACAAAGGGCCGAGTTAAGGCAGAGTCATCACCTCCTACCCAACGACCAAGTTATAAGTACAAAGGGTCAGAGAATCCTCTCGCCATCC
808	GAGGGAGTTAACACTTCCTGCCTCACCACCAAGTAAGTACAAGGGATAAA	CCACAAAGGGCCGAGTTAAG	AGAGAATCCTCTCGCCATCC	CCACAAAGGGCCGAGTTAAGGAGGGAGTTAACACTTCCTGCCTCACCACCAAGTAAGTACAAGGGATAAAAGAGAATCCTCTCGCCATCC
809	AAAATACGTAACCAATTTAGCTTTGAATATAGTTTTCTTATAAATGCAAT	CCACAAAGGGCCGAGTTAAG	AGAGAATCCTCTCGCCATCC	CCACAAAGGGCCGAGTTAAGAAAATACGTAACCAATTTAGCTTTGAATATAGTTTTCTTATAAATGCAATAGAGAATCCTCTCGCCATCC
810	CACGAGGTCAGGGGTGGGCAACTGTTTTGTCACGGGCATCTCAACCTCAA	CCACAAAGGGCCGAGTTAAG	AGAGAATCCTCTCGCCATCC	CCACAAAGGGCCGAGTTAAGCACGAGGTCAGGGGTGGGCAACTGTTTTGTCACGGGCATCTCAACCTCAAAGAGAATCCTCTCGCCATCC
811	AGGTCTGAAATGATACTTGTTTATGAGTACATGGCAAATGGACCTCTTAG	CCACAAAGGGCCGAGTTAAG	AGAGAATCCTCTCGCCATCC	CCACAAAGGGCCGAGTTAAGAGGTCTGAAATGATACTTGTTTATGAGTACATGGCAAATGGACCTCTTAGAGAGAATCCTCTCGCCATCC
812	CTATTCAAAATATCTCAAATTATGAACAAATCGTATTAATTAATTTAGTT	CCACAAAGGGCCGAGTTAAG	AGAGAATCCTCTCGCCATCC	CCACAAAGGGCCGAGTTAAGCTATTCAAAATATCTCAAATTATGAACAAATCGTATTAATTAATTTAGTTAGAGAATCCTCTCGCCATCC
813	TTTGACTCGAACAAAGATTTATAAACATAGTTTAAAGAAGACAATTTATA	CCACAAAGGGCCGAGTTAAG	AGAGAATCCTCTCGCCATCC	CCACAAAGGGCCGAGTTAAGTTTGACTCGAACAAAGATTTATAAACATAGTTTAAAGAAGACAATTTATAAGAGAATCCTCTCGCCATCC
814	AACAGATTATTAGTGTTATAATGGAAGTTTCTAAAAGCTTTCACTTCTTA	CCACAAAGGGCCGAGTTAAG	AGAGAATCCTCTCGCCATCC	CCACAAAGGGCCGAGTTAAGAACAGATTATTAGTGTTATAATGGAAGTTTCTAAAAGCTTTCACTTCTTAAGAGAATCCTCTCGCCATCC
815	TTAAAATTACAAGCAAACAATAATTACATTAAATAGAGCTATATACAAAT	CCACAAAGGGCCGAGTTAAG	AGAGAATCCTCTCGCCATCC	CCACAAAGGGCCGAGTTAAGTTAAAATTACAAGCAAACAATAATTACATTAAATAGAGCTATATACAAATAGAGAATCCTCTCGCCATCC
816	TTTGAAAATGAAATACATATTACCAAAATAAGTTAATTCATATGATACTC	CCACAAAGGGCCGAGTTAAG	AGAGAATCCTCTCGCCATCC	CCACAAAGGGCCGAGTTAAGTTTGAAAATGAAATACATATTACCAAAATAAGTTAATTCATATGATACTCAGAGAATCCTCTCGCCATCC
817	ACACAAGGAAATAAATAACCCAATTAAAGAAATTATGTAAGGCCAGCAAA	CCACAAAGGGCCGAGTTAAG	AGAGAATCCTCTCGCCATCC	CCACAAAGGGCCGAGTTAAGACACAAGGAAATAAATAACCCAATTAAAGAAATTATGTAAGGCCAGCAAAAGAGAATCCTCTCGCCATCC
818	CCAACTGTGCCATCAATAGGATCAAGAACCCAATGCTTACCCACTGGACC	CCACAAAGGGCCGAGTTAAG	AGAGAATCCTCTCGCCATCC	CCACAAAGGGCCGAGTTAAGCCAACTGTGCCATCAATAGGATCAAGAACCCAATGCTTACCCACTGGACCAGAGAATCCTCTCGCCATCC
819	AGAATTTCAAACCTAAATCCAACAGTATTAGCAAGTCCAGCTGTGAAGGA	CCACAAAGGGCCGAGTTAAG	AGAGAATCCTCTCGCCATCC	CCACAAAGGGCCGAGTTAAGAGAATTTCAAACCTAAATCCAACAGTATTAGCAAGTCCAGCTGTGAAGGAAGAGAATCCTCTCGCCATCC
820	AGCAAGACACCGACAGAAAGCTAGCAACCTATACACAAGATGATCAATCG	CCACAAAGGGCCGAGTTAAG	AGAGAATCCTCTCGCCATCC	CCACAAAGGGCCGAGTTAAGAGCAAGACACCGACAGAAAGCTAGCAACCTATACACAAGATGATCAATCGAGAGAATCCTCTCGCCATCC
821	TACAATCAACCCCAAAACGCAGGTAGGTTTAAAATTTGAGGATAGAATTT	CCACAAAGGGCCGAGTTAAG	AGAGAATCCTCTCGCCATCC	CCACAAAGGGCCGAGTTAAGTACAATCAACCCCAAAACGCAGGTAGGTTTAAAATTTGAGGATAGAATTTAGAGAATCCTCTCGCCATCC
822	CTATAAAATAGTGTTTTACTTTCCAAATGTATCCCTCTGATTGATTGGTT	CCACAAAGGGCCGAGTTAAG	AGAGAATCCTCTCGCCATCC	CCACAAAGGGCCGAGTTAAGCTATAAAATAGTGTTTTACTTTCCAAATGTATCCCTCTGATTGATTGGTTAGAGAATCCTCTCGCCATCC
823	AAAAGGATAATTTAAAACTTCCCCTTTCTGCCTTTCTACATGGAGAATTT	CCACAAAGGGCCGAGTTAAG	AGAGAATCCTCTCGCCATCC	CCACAAAGGGCCGAGTTAAGAAAAGGATAATTTAAAACTTCCCCTTTCTGCCTTTCTACATGGAGAATTTAGAGAATCCTCTCGCCATCC
824	TAGACATAAACGAGACTTTTATAGTTACAATCTCTTCCATATGTATATAT	CCACAAAGGGCCGAGTTAAG	AGAGAATCCTCTCGCCATCC	CCACAAAGGGCCGAGTTAAGTAGACATAAACGAGACTTTTATAGTTACAATCTCTTCCATATGTATATATAGAGAATCCTCTCGCCATCC
825	ATCTCTAACGCCGAAAGATACCTGTAGTACAAAGTATTAAATACGCCTGA	CCACAAAGGGCCGAGTTAAG	AGAGAATCCTCTCGCCATCC	CCACAAAGGGCCGAGTTAAGATCTCTAACGCCGAAAGATACCTGTAGTACAAAGTATTAAATACGCCTGAAGAGAATCCTCTCGCCATCC
826	GCTTAGATTTGGATTCGTTTTAATTCTATTTTGTTATTTACTCAAATGAA	CCACAAAGGGCCGAGTTAAG	AGAGAATCCTCTCGCCATCC	CCACAAAGGGCCGAGTTAAGGCTTAGATTTGGATTCGTTTTAATTCTATTTTGTTATTTACTCAAATGAAAGAGAATCCTCTCGCCATCC
827	ATCACTTCCCATTCGAGGATCATAGATATAAGTAATAGTAATATATTATT	CCACAAAGGGCCGAGTTAAG	AGAGAATCCTCTCGCCATCC	CCACAAAGGGCCGAGTTAAGATCACTTCCCATTCGAGGATCATAGATATAAGTAATAGTAATATATTATTAGAGAATCCTCTCGCCATCC
828	TATATATTTATTGGTTGAAGCAGAAAATTTGGATCTAATATATTTGCAAA	CCACAAAGGGCCGAGTTAAG	AGAGAATCCTCTCGCCATCC	CCACAAAGGGCCGAGTTAAGTATATATTTATTGGTTGAAGCAGAAAATTTGGATCTAATATATTTGCAAAAGAGAATCCTCTCGCCATCC
829	TAAGTCATATTACTAGTCAAAATCCTTAAAATTGGTGCCTTTTGGCGAGA	CCACAAAGGGCCGAGTTAAG	AGAGAATCCTCTCGCCATCC	CCACAAAGGGCCGAGTTAAGTAAGTCATATTACTAGTCAAAATCCTTAAAATTGGTGCCTTTTGGCGAGAAGAGAATCCTCTCGCCATCC
830	GATATGGGGACCGAATCAAGTGTTTAGGTTTGTTGTTGGACTCATAACAT	CCACAAAGGGCCGAGTTAAG	AGAGAATCCTCTCGCCATCC	CCACAAAGGGCCGAGTTAAGGATATGGGGACCGAATCAAGTGTTTAGGTTTGTTGTTGGACTCATAACATAGAGAATCCTCTCGCCATCC
831	AAATGCCATACCAATCTTATACTGAATAATGTTTAAGCGACTTTATTTAC	CCACAAAGGGCCGAGTTAAG	AGAGAATCCTCTCGCCATCC	CCACAAAGGGCCGAGTTAAGAAATGCCATACCAATCTTATACTGAATAATGTTTAAGCGACTTTATTTACAGAGAATCCTCTCGCCATCC
832	TCTCTCTCTCTTTCTCCGTGTGGTTTCCATGACTGAAGAAGATTAAGTGA	CCACAAAGGGCCGAGTTAAG	AGAGAATCCTCTCGCCATCC	CCACAAAGGGCCGAGTTAAGTCTCTCTCTCTTTCTCCGTGTGGTTTCCATGACTGAAGAAGATTAAGTGAAGAGAATCCTCTCGCCATCC
833	GTGAGAAAACAAACAATACGATGATACATACATTATAAGCAACCGAATCT	CCACAAAGGGCCGAGTTAAG	AGAGAATCCTCTCGCCATCC	CCACAAAGGGCCGAGTTAAGGTGAGAAAACAAACAATACGATGATACATACATTATAAGCAACCGAATCTAGAGAATCCTCTCGCCATCC
834	AAGGATACTATGTGACTGCTAACCATGAAGGCTGTTACACGTTCAGATAC	CCACAAAGGGCCGAGTTAAG	AGAGAATCCTCTCGCCATCC	CCACAAAGGGCCGAGTTAAGAAGGATACTATGTGACTGCTAACCATGAAGGCTGTTACACGTTCAGATACAGAGAATCCTCTCGCCATCC
835	TAAATTGTGTTAGTTGTTGAGTAGTCATTGTCGTAGGAATGAGTTGGGGC	CCACAAAGGGCCGAGTTAAG	AGAGAATCCTCTCGCCATCC	CCACAAAGGGCCGAGTTAAGTAAATTGTGTTAGTTGTTGAGTAGTCATTGTCGTAGGAATGAGTTGGGGCAGAGAATCCTCTCGCCATCC
836	AAATGATGATATAATGGAAATGTACTCTAAAATGACAGGAATGACTAAAA	CCACAAAGGGCCGAGTTAAG	AGAGAATCCTCTCGCCATCC	CCACAAAGGGCCGAGTTAAGAAATGATGATATAATGGAAATGTACTCTAAAATGACAGGAATGACTAAAAAGAGAATCCTCTCGCCATCC
837	TGTATTTGTTGTGTACACTAAATATACAATTAGTTACGTGTTGTTGGTTA	CCACAAAGGGCCGAGTTAAG	AGAGAATCCTCTCGCCATCC	CCACAAAGGGCCGAGTTAAGTGTATTTGTTGTGTACACTAAATATACAATTAGTTACGTGTTGTTGGTTAAGAGAATCCTCTCGCCATCC
838	TAAACAAGAAAATTTTAAGATAGAGATAAATTAATGATATAAATAGACAC	CCACAAAGGGCCGAGTTAAG	AGAGAATCCTCTCGCCATCC	CCACAAAGGGCCGAGTTAAGTAAACAAGAAAATTTTAAGATAGAGATAAATTAATGATATAAATAGACACAGAGAATCCTCTCGCCATCC
839	TTGCTTGATTCCCAAGAATGTAATATATTATAGTTTAATATTTTCTTAGC	CCACAAAGGGCCGAGTTAAG	AGAGAATCCTCTCGCCATCC	CCACAAAGGGCCGAGTTAAGTTGCTTGATTCCCAAGAATGTAATATATTATAGTTTAATATTTTCTTAGCAGAGAATCCTCTCGCCATCC
840	AAATGTGAGGTTAGAATTTGTTGTAAGATCAAGTTTGGGAGATTTTGTTA	CCACAAAGGGCCGAGTTAAG	AGAGAATCCTCTCGCCATCC	CCACAAAGGGCCGAGTTAAGAAATGTGAGGTTAGAATTTGTTGTAAGATCAAGTTTGGGAGATTTTGTTAAGAGAATCCTCTCGCCATCC
841	AACACAATACTGAAATTTCTATCCTCGAACCTGTTAAAATAGAAGAAACT	CCACAAAGGGCCGAGTTAAG	AGAGAATCCTCTCGCCATCC	CCACAAAGGGCCGAGTTAAGAACACAATACTGAAATTTCTATCCTCGAACCTGTTAAAATAGAAGAAACTAGAGAATCCTCTCGCCATCC
842	TTGATCTTGCTGCCAAGTTGTATGAGAAGGTCCGTGCTCTTTATGCTGGT	CCACAAAGGGCCGAGTTAAG	AGAGAATCCTCTCGCCATCC	CCACAAAGGGCCGAGTTAAGTTGATCTTGCTGCCAAGTTGTATGAGAAGGTCCGTGCTCTTTATGCTGGTAGAGAATCCTCTCGCCATCC
843	CAGGTGCTTGTAAGATGTTCTAAATTCTAATTCTGGTTCTGAATCTTACT	CCACAAAGGGCCGAGTTAAG	AGAGAATCCTCTCGCCATCC	CCACAAAGGGCCGAGTTAAGCAGGTGCTTGTAAGATGTTCTAAATTCTAATTCTGGTTCTGAATCTTACTAGAGAATCCTCTCGCCATCC
844	TCCAGGGATTTCTCATGTATTTTCCTAGCTATAGACACTGAACTGATGCC	CCACAAAGGGCCGAGTTAAG	AGAGAATCCTCTCGCCATCC	CCACAAAGGGCCGAGTTAAGTCCAGGGATTTCTCATGTATTTTCCTAGCTATAGACACTGAACTGATGCCAGAGAATCCTCTCGCCATCC
845	AATGTTACTTTATCTGTATGCATAACAAAGGCCATTAATTATACGCGTAA	CCACAAAGGGCCGAGTTAAG	AGAGAATCCTCTCGCCATCC	CCACAAAGGGCCGAGTTAAGAATGTTACTTTATCTGTATGCATAACAAAGGCCATTAATTATACGCGTAAAGAGAATCCTCTCGCCATCC
846	TGAGCTTCTTCCTATAAGGATCCAACCCTACTCAAATAAGGATTAATTTG	CCACAAAGGGCCGAGTTAAG	AGAGAATCCTCTCGCCATCC	CCACAAAGGGCCGAGTTAAGTGAGCTTCTTCCTATAAGGATCCAACCCTACTCAAATAAGGATTAATTTGAGAGAATCCTCTCGCCATCC
847	GTTTGCAGGAGTTCTTTCAATAGCTGATCCATAACCAATTAAATGCGCCA	CCACAAAGGGCCGAGTTAAG	AGAGAATCCTCTCGCCATCC	CCACAAAGGGCCGAGTTAAGGTTTGCAGGAGTTCTTTCAATAGCTGATCCATAACCAATTAAATGCGCCAAGAGAATCCTCTCGCCATCC
848	TCATAACAAGGTAATTTATAGACGTTGGATATAGATAGACTCATCTTTCA	CCACAAAGGGCCGAGTTAAG	AGAGAATCCTCTCGCCATCC	CCACAAAGGGCCGAGTTAAGTCATAACAAGGTAATTTATAGACGTTGGATATAGATAGACTCATCTTTCAAGAGAATCCTCTCGCCATCC
849	AAGATAAAATCACATATTTGCTTGACTTACCATTTTCTTCTCATTTGACA	CCACAAAGGGCCGAGTTAAG	AGAGAATCCTCTCGCCATCC	CCACAAAGGGCCGAGTTAAGAAGATAAAATCACATATTTGCTTGACTTACCATTTTCTTCTCATTTGACAAGAGAATCCTCTCGCCATCC
850	GGAGGGCCATCAACCAGAACAGTAATTCATTATTCGATGCTGTCAAATAA	CCACAAAGGGCCGAGTTAAG	AGAGAATCCTCTCGCCATCC	CCACAAAGGGCCGAGTTAAGGGAGGGCCATCAACCAGAACAGTAATTCATTATTCGATGCTGTCAAATAAAGAGAATCCTCTCGCCATCC
851	TGTGGAAATCTACTACGAATTCTTGCGTCTGTTGTCAGTATATATTCCAC	CCACAAAGGGCCGAGTTAAG	AGAGAATCCTCTCGCCATCC	CCACAAAGGGCCGAGTTAAGTGTGGAAATCTACTACGAATTCTTGCGTCTGTTGTCAGTATATATTCCACAGAGAATCCTCTCGCCATCC
852	CTCTCTTTTATTCTATTAGTTAGATGTTGTCAATATACACTCAAATTTTA	CCACAAAGGGCCGAGTTAAG	AGAGAATCCTCTCGCCATCC	CCACAAAGGGCCGAGTTAAGCTCTCTTTTATTCTATTAGTTAGATGTTGTCAATATACACTCAAATTTTAAGAGAATCCTCTCGCCATCC
853	AGTAAAAGAAGGAACAATTCTAAAATATTAACCAACCACTGAACTGTCCC	CCACAAAGGGCCGAGTTAAG	AGAGAATCCTCTCGCCATCC	CCACAAAGGGCCGAGTTAAGAGTAAAAGAAGGAACAATTCTAAAATATTAACCAACCACTGAACTGTCCCAGAGAATCCTCTCGCCATCC
854	GAACAATGGAGGGAAATGTGAAGAAAGCTTTAAAGGTAGTTCAATTTATG	CCACAAAGGGCCGAGTTAAG	AGAGAATCCTCTCGCCATCC	CCACAAAGGGCCGAGTTAAGGAACAATGGAGGGAAATGTGAAGAAAGCTTTAAAGGTAGTTCAATTTATGAGAGAATCCTCTCGCCATCC
855	AAGCATATGATTCTTCTGACAGATTTGCATATATTGATTCAATTAAAGAA	CCACAAAGGGCCGAGTTAAG	AGAGAATCCTCTCGCCATCC	CCACAAAGGGCCGAGTTAAGAAGCATATGATTCTTCTGACAGATTTGCATATATTGATTCAATTAAAGAAAGAGAATCCTCTCGCCATCC
856	GTTTGCTTCTCAAGACCTCTTACAATTTTCTATTTATTTCAGATTGCAAA	CCACAAAGGGCCGAGTTAAG	AGAGAATCCTCTCGCCATCC	CCACAAAGGGCCGAGTTAAGGTTTGCTTCTCAAGACCTCTTACAATTTTCTATTTATTTCAGATTGCAAAAGAGAATCCTCTCGCCATCC
857	ACCATAGATATATCAAATAAGTAATTGAAAAGACTTGATACTTGCACTTG	CCACAAAGGGCCGAGTTAAG	AGAGAATCCTCTCGCCATCC	CCACAAAGGGCCGAGTTAAGACCATAGATATATCAAATAAGTAATTGAAAAGACTTGATACTTGCACTTGAGAGAATCCTCTCGCCATCC
858	TACAGAAGATAGATTTTAGAGTAGAAGAATGTATGTCTATATATATCTGT	CCACAAAGGGCCGAGTTAAG	AGAGAATCCTCTCGCCATCC	CCACAAAGGGCCGAGTTAAGTACAGAAGATAGATTTTAGAGTAGAAGAATGTATGTCTATATATATCTGTAGAGAATCCTCTCGCCATCC
859	AAACTGGGGATGTAGTTCGATCGGCAAAATTAGTGGAAGGAGAAGACCGC	CCACAAAGGGCCGAGTTAAG	AGAGAATCCTCTCGCCATCC	CCACAAAGGGCCGAGTTAAGAAACTGGGGATGTAGTTCGATCGGCAAAATTAGTGGAAGGAGAAGACCGCAGAGAATCCTCTCGCCATCC
860	TTCATAAATCAATAAACTCATCATCTGAAAAGGAAAAGAGACACAAACTT	CCACAAAGGGCCGAGTTAAG	AGAGAATCCTCTCGCCATCC	CCACAAAGGGCCGAGTTAAGTTCATAAATCAATAAACTCATCATCTGAAAAGGAAAAGAGACACAAACTTAGAGAATCCTCTCGCCATCC
861	AAATAATAATACTATAGAATTTGATTTTCTCTCCACAAAGATGATCTTAG	CCACAAAGGGCCGAGTTAAG	AGAGAATCCTCTCGCCATCC	CCACAAAGGGCCGAGTTAAGAAATAATAATACTATAGAATTTGATTTTCTCTCCACAAAGATGATCTTAGAGAGAATCCTCTCGCCATCC
862	ACAAATCTGTTTAATGGAACAAATCTATTATAATATAAGTCTTAGATTGT	CCACAAAGGGCCGAGTTAAG	AGAGAATCCTCTCGCCATCC	CCACAAAGGGCCGAGTTAAGACAAATCTGTTTAATGGAACAAATCTATTATAATATAAGTCTTAGATTGTAGAGAATCCTCTCGCCATCC
863	CAGAATCTTGTTGATCGGTATAGTCACAGCTTTGTACTGGGATGAAATCG	CCACAAAGGGCCGAGTTAAG	AGAGAATCCTCTCGCCATCC	CCACAAAGGGCCGAGTTAAGCAGAATCTTGTTGATCGGTATAGTCACAGCTTTGTACTGGGATGAAATCGAGAGAATCCTCTCGCCATCC
864	CAACACAGAAACACATAATAATTGGGTTCATTTGCAACTCCAAGCTATAA	CCACAAAGGGCCGAGTTAAG	AGAGAATCCTCTCGCCATCC	CCACAAAGGGCCGAGTTAAGCAACACAGAAACACATAATAATTGGGTTCATTTGCAACTCCAAGCTATAAAGAGAATCCTCTCGCCATCC
865	ATCTCAAAATCTCGAAAAGAGTCCACCCCTGAAAAGAGAAAGAACTACTT	CCACAAAGGGCCGAGTTAAG	AGAGAATCCTCTCGCCATCC	CCACAAAGGGCCGAGTTAAGATCTCAAAATCTCGAAAAGAGTCCACCCCTGAAAAGAGAAAGAACTACTTAGAGAATCCTCTCGCCATCC
866	TAGGCTTTTCACTGCATGGATCACTATCTCATTATTACTATCAATTCTGT	CCACAAAGGGCCGAGTTAAG	AGAGAATCCTCTCGCCATCC	CCACAAAGGGCCGAGTTAAGTAGGCTTTTCACTGCATGGATCACTATCTCATTATTACTATCAATTCTGTAGAGAATCCTCTCGCCATCC
867	ACCCACCAATCATCAAAAGGAAAGAGAGCCTGAAAAGTAGGATATGAAGT	CCACAAAGGGCCGAGTTAAG	AGAGAATCCTCTCGCCATCC	CCACAAAGGGCCGAGTTAAGACCCACCAATCATCAAAAGGAAAGAGAGCCTGAAAAGTAGGATATGAAGTAGAGAATCCTCTCGCCATCC
868	CCGATTCCGATGTGAAGGATGATGAGGATGAGAGTCCCCACACCCAGTCC	CCACAAAGGGCCGAGTTAAG	AGAGAATCCTCTCGCCATCC	CCACAAAGGGCCGAGTTAAGCCGATTCCGATGTGAAGGATGATGAGGATGAGAGTCCCCACACCCAGTCCAGAGAATCCTCTCGCCATCC
869	AATTGCCTTGGCGGGAACATCGTCGGCTGTTGAGTCCATATACTTCGGCA	CCACAAAGGGCCGAGTTAAG	AGAGAATCCTCTCGCCATCC	CCACAAAGGGCCGAGTTAAGAATTGCCTTGGCGGGAACATCGTCGGCTGTTGAGTCCATATACTTCGGCAAGAGAATCCTCTCGCCATCC
870	TATCGTCCATTTGTTATGTTTATTCTTGTTATTATACTTATAATTAATTA	CCACAAAGGGCCGAGTTAAG	AGAGAATCCTCTCGCCATCC	CCACAAAGGGCCGAGTTAAGTATCGTCCATTTGTTATGTTTATTCTTGTTATTATACTTATAATTAATTAAGAGAATCCTCTCGCCATCC
871	TGGTTAAACTCTTATTACTGAACTGATATTGCCAATAAAATTAACTCTTT	CCACAAAGGGCCGAGTTAAG	AGAGAATCCTCTCGCCATCC	CCACAAAGGGCCGAGTTAAGTGGTTAAACTCTTATTACTGAACTGATATTGCCAATAAAATTAACTCTTTAGAGAATCCTCTCGCCATCC
872	GTTGTTTGTACTCTTTCCTTAGAATGTAAATTGCAATTAATTAAAACGAT	CCACAAAGGGCCGAGTTAAG	AGAGAATCCTCTCGCCATCC	CCACAAAGGGCCGAGTTAAGGTTGTTTGTACTCTTTCCTTAGAATGTAAATTGCAATTAATTAAAACGATAGAGAATCCTCTCGCCATCC
873	TACCTGTGAAGCGGACACTCCCTGCCTTGTACTGGAATGACGAAGGTAAC	CCACAAAGGGCCGAGTTAAG	AGAGAATCCTCTCGCCATCC	CCACAAAGGGCCGAGTTAAGTACCTGTGAAGCGGACACTCCCTGCCTTGTACTGGAATGACGAAGGTAACAGAGAATCCTCTCGCCATCC
874	TTGGTTGGTTTTCAGCTAAGGCAACGTTTGGAGAACAAGAATGGTATTTC	CCACAAAGGGCCGAGTTAAG	AGAGAATCCTCTCGCCATCC	CCACAAAGGGCCGAGTTAAGTTGGTTGGTTTTCAGCTAAGGCAACGTTTGGAGAACAAGAATGGTATTTCAGAGAATCCTCTCGCCATCC
875	ATTTTAAAATAAGAAACACTCCAATTAATTTCGGTTAAATAAAATCTTGA	CCACAAAGGGCCGAGTTAAG	AGAGAATCCTCTCGCCATCC	CCACAAAGGGCCGAGTTAAGATTTTAAAATAAGAAACACTCCAATTAATTTCGGTTAAATAAAATCTTGAAGAGAATCCTCTCGCCATCC
876	TCCCATCGTTAATTATATTTCCTCCCTCTCCATCCATCGATCCCACCAAA	CCACAAAGGGCCGAGTTAAG	AGAGAATCCTCTCGCCATCC	CCACAAAGGGCCGAGTTAAGTCCCATCGTTAATTATATTTCCTCCCTCTCCATCCATCGATCCCACCAAAAGAGAATCCTCTCGCCATCC
877	TTAGTGGGTATGTTCTCAAGTAACGTATATATAGTCCTATACAAAAGACT	CCACAAAGGGCCGAGTTAAG	AGAGAATCCTCTCGCCATCC	CCACAAAGGGCCGAGTTAAGTTAGTGGGTATGTTCTCAAGTAACGTATATATAGTCCTATACAAAAGACTAGAGAATCCTCTCGCCATCC
878	TAAATGGTCAATACAATTTGAAAGCTTCGGTATGATCACTAACACCAAGA	CCACAAAGGGCCGAGTTAAG	AGAGAATCCTCTCGCCATCC	CCACAAAGGGCCGAGTTAAGTAAATGGTCAATACAATTTGAAAGCTTCGGTATGATCACTAACACCAAGAAGAGAATCCTCTCGCCATCC
879	GGGAACCATAACTAATATAATATCAATTCATAACCAACTCATCACAGTCT	CCACAAAGGGCCGAGTTAAG	AGAGAATCCTCTCGCCATCC	CCACAAAGGGCCGAGTTAAGGGGAACCATAACTAATATAATATCAATTCATAACCAACTCATCACAGTCTAGAGAATCCTCTCGCCATCC
880	AGTACCATTCTTTCTCCCCAAATATTGCCTTGCCTTCACAAATTTATTCA	CCACAAAGGGCCGAGTTAAG	AGAGAATCCTCTCGCCATCC	CCACAAAGGGCCGAGTTAAGAGTACCATTCTTTCTCCCCAAATATTGCCTTGCCTTCACAAATTTATTCAAGAGAATCCTCTCGCCATCC
881	ACCAACTTGCTATAAATATATTATTATACTACTTACTTACCAGTTCTTTT	CCACAAAGGGCCGAGTTAAG	AGAGAATCCTCTCGCCATCC	CCACAAAGGGCCGAGTTAAGACCAACTTGCTATAAATATATTATTATACTACTTACTTACCAGTTCTTTTAGAGAATCCTCTCGCCATCC
882	AACAATTCCTTAATTTCTCTTAAACAACATCTCAAATTTAAATTTTATGT	CCACAAAGGGCCGAGTTAAG	AGAGAATCCTCTCGCCATCC	CCACAAAGGGCCGAGTTAAGAACAATTCCTTAATTTCTCTTAAACAACATCTCAAATTTAAATTTTATGTAGAGAATCCTCTCGCCATCC
883	AACTTATGTATTCAGGTATGATTGTTATGGGAAATGGGGAAGAGCATAAA	CCACAAAGGGCCGAGTTAAG	AGAGAATCCTCTCGCCATCC	CCACAAAGGGCCGAGTTAAGAACTTATGTATTCAGGTATGATTGTTATGGGAAATGGGGAAGAGCATAAAAGAGAATCCTCTCGCCATCC
884	CGAAATTTCCACAGCCCAGCTAGTTAGATATTTCACTTACTTTAGTACAA	CCACAAAGGGCCGAGTTAAG	AGAGAATCCTCTCGCCATCC	CCACAAAGGGCCGAGTTAAGCGAAATTTCCACAGCCCAGCTAGTTAGATATTTCACTTACTTTAGTACAAAGAGAATCCTCTCGCCATCC
885	CTAGAAGAGTACTTTTCACCTCCCTAACGATTACAACTAATTAAGAAAGC	CCACAAAGGGCCGAGTTAAG	AGAGAATCCTCTCGCCATCC	CCACAAAGGGCCGAGTTAAGCTAGAAGAGTACTTTTCACCTCCCTAACGATTACAACTAATTAAGAAAGCAGAGAATCCTCTCGCCATCC
886	GGTAGTACAATGTACCGATATTTGATTTAATAATTTCTTAATCACTAAAG	CCACAAAGGGCCGAGTTAAG	AGAGAATCCTCTCGCCATCC	CCACAAAGGGCCGAGTTAAGGGTAGTACAATGTACCGATATTTGATTTAATAATTTCTTAATCACTAAAGAGAGAATCCTCTCGCCATCC
887	ATATTTATATGGGAAATATGATCATCATGTTAGATAATACTACAAACTCA	CCACAAAGGGCCGAGTTAAG	AGAGAATCCTCTCGCCATCC	CCACAAAGGGCCGAGTTAAGATATTTATATGGGAAATATGATCATCATGTTAGATAATACTACAAACTCAAGAGAATCCTCTCGCCATCC
888	TTTAAACTTTTAAAATAAAGATGATGAGGAAAATTAGAAAATTGTACTTG	CCACAAAGGGCCGAGTTAAG	AGAGAATCCTCTCGCCATCC	CCACAAAGGGCCGAGTTAAGTTTAAACTTTTAAAATAAAGATGATGAGGAAAATTAGAAAATTGTACTTGAGAGAATCCTCTCGCCATCC
889	TGAATTGTAAAACATTAACCATGGAAGTATTAAATAAACTATCAATAAAT	CCACAAAGGGCCGAGTTAAG	AGAGAATCCTCTCGCCATCC	CCACAAAGGGCCGAGTTAAGTGAATTGTAAAACATTAACCATGGAAGTATTAAATAAACTATCAATAAATAGAGAATCCTCTCGCCATCC
890	CCTCAGTGTCTACCATCTCTATTTCCATAGCTGAACTCTCTCCCTATCAA	CCACAAAGGGCCGAGTTAAG	AGAGAATCCTCTCGCCATCC	CCACAAAGGGCCGAGTTAAGCCTCAGTGTCTACCATCTCTATTTCCATAGCTGAACTCTCTCCCTATCAAAGAGAATCCTCTCGCCATCC
891	TTAGTTTTAATATATACATACTTCCTCCTGTTCGAGAAAACACAATATTT	CCACAAAGGGCCGAGTTAAG	AGAGAATCCTCTCGCCATCC	CCACAAAGGGCCGAGTTAAGTTAGTTTTAATATATACATACTTCCTCCTGTTCGAGAAAACACAATATTTAGAGAATCCTCTCGCCATCC
892	TGCGCAGAAATTGGCGGGATGGAAGAAGCGTCAACTGTCGAGTGCTGGTA	CCACAAAGGGCCGAGTTAAG	AGAGAATCCTCTCGCCATCC	CCACAAAGGGCCGAGTTAAGTGCGCAGAAATTGGCGGGATGGAAGAAGCGTCAACTGTCGAGTGCTGGTAAGAGAATCCTCTCGCCATCC
893	TCTGATCAAGAACCGAATTAAAATCACCCACAAGCATCCAAGCTCCATCA	CCACAAAGGGCCGAGTTAAG	AGAGAATCCTCTCGCCATCC	CCACAAAGGGCCGAGTTAAGTCTGATCAAGAACCGAATTAAAATCACCCACAAGCATCCAAGCTCCATCAAGAGAATCCTCTCGCCATCC
894	GGATCGACCCAATCCCCGACAGTTCCAAACAAAGACTAACATTGAGGGAG	CCACAAAGGGCCGAGTTAAG	AGAGAATCCTCTCGCCATCC	CCACAAAGGGCCGAGTTAAGGGATCGACCCAATCCCCGACAGTTCCAAACAAAGACTAACATTGAGGGAGAGAGAATCCTCTCGCCATCC
895	CCTTAAACACCGTCTTTCTGAATTCAACACCTAAAAGATAAATCAACGTC	CCACAAAGGGCCGAGTTAAG	AGAGAATCCTCTCGCCATCC	CCACAAAGGGCCGAGTTAAGCCTTAAACACCGTCTTTCTGAATTCAACACCTAAAAGATAAATCAACGTCAGAGAATCCTCTCGCCATCC
896	TTCATTTTGGAAAATTTATACTTCTTTGGATTATTGATTATTTTGTTACT	CCACAAAGGGCCGAGTTAAG	AGAGAATCCTCTCGCCATCC	CCACAAAGGGCCGAGTTAAGTTCATTTTGGAAAATTTATACTTCTTTGGATTATTGATTATTTTGTTACTAGAGAATCCTCTCGCCATCC
897	ACAGAGATCCAATTCTGAGCACATGACACAATATTTCTATCATTTTCTTC	CCACAAAGGGCCGAGTTAAG	AGAGAATCCTCTCGCCATCC	CCACAAAGGGCCGAGTTAAGACAGAGATCCAATTCTGAGCACATGACACAATATTTCTATCATTTTCTTCAGAGAATCCTCTCGCCATCC
898	TGGACCCCTTTGAGAATCTCCAAATGCAGCCTTGAGGACCAGGGTTTACA	CCACAAAGGGCCGAGTTAAG	AGAGAATCCTCTCGCCATCC	CCACAAAGGGCCGAGTTAAGTGGACCCCTTTGAGAATCTCCAAATGCAGCCTTGAGGACCAGGGTTTACAAGAGAATCCTCTCGCCATCC
899	CAAGAAATTTAAGCGGAGAAAAGTTTGAAGGATACTGAACTTCTGATGAA	CCACAAAGGGCCGAGTTAAG	AGAGAATCCTCTCGCCATCC	CCACAAAGGGCCGAGTTAAGCAAGAAATTTAAGCGGAGAAAAGTTTGAAGGATACTGAACTTCTGATGAAAGAGAATCCTCTCGCCATCC
900	TCTATAATAAAATTATTGATAACCTCATACTTAAAGGTAATATTATGGAT	CCACAAAGGGCCGAGTTAAG	AGAGAATCCTCTCGCCATCC	CCACAAAGGGCCGAGTTAAGTCTATAATAAAATTATTGATAACCTCATACTTAAAGGTAATATTATGGATAGAGAATCCTCTCGCCATCC
901	ATATGGATATATTCTTGAAATGAAGGTATTAAGCCATTTGTGACAATTCA	CCACAAAGGGCCGAGTTAAG	AGAGAATCCTCTCGCCATCC	CCACAAAGGGCCGAGTTAAGATATGGATATATTCTTGAAATGAAGGTATTAAGCCATTTGTGACAATTCAAGAGAATCCTCTCGCCATCC
902	AAAGCATGTATGACTATTCCTATAATCCCACCTTGTTCTGACTGTCACAA	CCACAAAGGGCCGAGTTAAG	AGAGAATCCTCTCGCCATCC	CCACAAAGGGCCGAGTTAAGAAAGCATGTATGACTATTCCTATAATCCCACCTTGTTCTGACTGTCACAAAGAGAATCCTCTCGCCATCC
903	TACTCAGGGGATTGCATTTTGTAAATTTTGCTGAATGTTTTGTGCACTCA	CCACAAAGGGCCGAGTTAAG	AGAGAATCCTCTCGCCATCC	CCACAAAGGGCCGAGTTAAGTACTCAGGGGATTGCATTTTGTAAATTTTGCTGAATGTTTTGTGCACTCAAGAGAATCCTCTCGCCATCC
904	GGCTATATGTCTTACAAGATTAGCAATGTAGGCATCATAAAATCTGACAT	CCACAAAGGGCCGAGTTAAG	AGAGAATCCTCTCGCCATCC	CCACAAAGGGCCGAGTTAAGGGCTATATGTCTTACAAGATTAGCAATGTAGGCATCATAAAATCTGACATAGAGAATCCTCTCGCCATCC
905	ATTCCAGTCTGTCAAGAACAAAAGAAATTAACTGGCCATGAGCATTTCTG	CCACAAAGGGCCGAGTTAAG	AGAGAATCCTCTCGCCATCC	CCACAAAGGGCCGAGTTAAGATTCCAGTCTGTCAAGAACAAAAGAAATTAACTGGCCATGAGCATTTCTGAGAGAATCCTCTCGCCATCC
906	TATATATAAGAATTGATATTGAATAGTTGGGTAATAGAACAAAGTTGCCG	CCACAAAGGGCCGAGTTAAG	AGAGAATCCTCTCGCCATCC	CCACAAAGGGCCGAGTTAAGTATATATAAGAATTGATATTGAATAGTTGGGTAATAGAACAAAGTTGCCGAGAGAATCCTCTCGCCATCC
907	ATTAGTTGAAATGTCTTAATTTGATGAGAAATCTGTTAGAAATTTAATTT	CCACAAAGGGCCGAGTTAAG	AGAGAATCCTCTCGCCATCC	CCACAAAGGGCCGAGTTAAGATTAGTTGAAATGTCTTAATTTGATGAGAAATCTGTTAGAAATTTAATTTAGAGAATCCTCTCGCCATCC
908	CTGTTACTAGCCCATGTAAAGGAAGTCTGAATGCGAATATGAATATGAAT	CCACAAAGGGCCGAGTTAAG	AGAGAATCCTCTCGCCATCC	CCACAAAGGGCCGAGTTAAGCTGTTACTAGCCCATGTAAAGGAAGTCTGAATGCGAATATGAATATGAATAGAGAATCCTCTCGCCATCC
909	ATACCCAAGTCCTATCTTAATTTTCCTTTGTCCGATCTGTCCATGTCATT	CCACAAAGGGCCGAGTTAAG	AGAGAATCCTCTCGCCATCC	CCACAAAGGGCCGAGTTAAGATACCCAAGTCCTATCTTAATTTTCCTTTGTCCGATCTGTCCATGTCATTAGAGAATCCTCTCGCCATCC
910	GGAAGATAAGCAGAAGGAGACAAAGAAGATGGCATCCCAATCCACATTCT	CCACAAAGGGCCGAGTTAAG	AGAGAATCCTCTCGCCATCC	CCACAAAGGGCCGAGTTAAGGGAAGATAAGCAGAAGGAGACAAAGAAGATGGCATCCCAATCCACATTCTAGAGAATCCTCTCGCCATCC
911	AAATTCTTACACTCTTACAGAATCATTTAGCTACAAATTCAGACATTGAA	CCACAAAGGGCCGAGTTAAG	AGAGAATCCTCTCGCCATCC	CCACAAAGGGCCGAGTTAAGAAATTCTTACACTCTTACAGAATCATTTAGCTACAAATTCAGACATTGAAAGAGAATCCTCTCGCCATCC
912	CCGCTCCTCCTCCTCCTCTGCCTCTATTAAGCTCTCCACCACAATGTCTG	CCACAAAGGGCCGAGTTAAG	AGAGAATCCTCTCGCCATCC	CCACAAAGGGCCGAGTTAAGCCGCTCCTCCTCCTCCTCTGCCTCTATTAAGCTCTCCACCACAATGTCTGAGAGAATCCTCTCGCCATCC
913	TTTAATAAGTATGGTTGTTCTTTATGATCAGGAATTGGGCAGATGTAGTG	CCACAAAGGGCCGAGTTAAG	AGAGAATCCTCTCGCCATCC	CCACAAAGGGCCGAGTTAAGTTTAATAAGTATGGTTGTTCTTTATGATCAGGAATTGGGCAGATGTAGTGAGAGAATCCTCTCGCCATCC
914	TATGTGTTGCTAATAAAACCGAGTGAATTGACAGGACAAACATATTCTCA	CCACAAAGGGCCGAGTTAAG	AGAGAATCCTCTCGCCATCC	CCACAAAGGGCCGAGTTAAGTATGTGTTGCTAATAAAACCGAGTGAATTGACAGGACAAACATATTCTCAAGAGAATCCTCTCGCCATCC
915	CGATCTAGCAACAGCGTCTCCTACATTTCAGATAACATTCCTCTAAAACT	CCACAAAGGGCCGAGTTAAG	AGAGAATCCTCTCGCCATCC	CCACAAAGGGCCGAGTTAAGCGATCTAGCAACAGCGTCTCCTACATTTCAGATAACATTCCTCTAAAACTAGAGAATCCTCTCGCCATCC
916	CAAAATTAGGTACGTGAGTCAAATTATTGGGGTATTCGGAATTATCGTTT	CCACAAAGGGCCGAGTTAAG	AGAGAATCCTCTCGCCATCC	CCACAAAGGGCCGAGTTAAGCAAAATTAGGTACGTGAGTCAAATTATTGGGGTATTCGGAATTATCGTTTAGAGAATCCTCTCGCCATCC
917	TGGGAGTAGGCTAATAAATCATTACATACTTACCTTGTCTATTTGTACAA	CCACAAAGGGCCGAGTTAAG	AGAGAATCCTCTCGCCATCC	CCACAAAGGGCCGAGTTAAGTGGGAGTAGGCTAATAAATCATTACATACTTACCTTGTCTATTTGTACAAAGAGAATCCTCTCGCCATCC
918	CGAGACTCACCAGGGAACAAGACAGGCTAACCAAGGAACAGGAGTTAACT	CCACAAAGGGCCGAGTTAAG	AGAGAATCCTCTCGCCATCC	CCACAAAGGGCCGAGTTAAGCGAGACTCACCAGGGAACAAGACAGGCTAACCAAGGAACAGGAGTTAACTAGAGAATCCTCTCGCCATCC
919	CACTGAATCCCCACACACTTGCAACCCGAGATAAGTCAAAATATTGCGCC	CCACAAAGGGCCGAGTTAAG	AGAGAATCCTCTCGCCATCC	CCACAAAGGGCCGAGTTAAGCACTGAATCCCCACACACTTGCAACCCGAGATAAGTCAAAATATTGCGCCAGAGAATCCTCTCGCCATCC
920	GTCAAGGATTATAAGGTAAGGCATGATGTCGCGGAGTCTAAGCTTCGTAT	CCACAAAGGGCCGAGTTAAG	AGAGAATCCTCTCGCCATCC	CCACAAAGGGCCGAGTTAAGGTCAAGGATTATAAGGTAAGGCATGATGTCGCGGAGTCTAAGCTTCGTATAGAGAATCCTCTCGCCATCC
921	CACTATTCAATGCTTCCACAGTTCTGTTCTGGCGATCCCTAGAGCTTCGT	CCACAAAGGGCCGAGTTAAG	AGAGAATCCTCTCGCCATCC	CCACAAAGGGCCGAGTTAAGCACTATTCAATGCTTCCACAGTTCTGTTCTGGCGATCCCTAGAGCTTCGTAGAGAATCCTCTCGCCATCC
922	ATGACCTACTCAGATCATACCTAAAATCCCCAACGCACAAAGACCTAATA	CCACAAAGGGCCGAGTTAAG	AGAGAATCCTCTCGCCATCC	CCACAAAGGGCCGAGTTAAGATGACCTACTCAGATCATACCTAAAATCCCCAACGCACAAAGACCTAATAAGAGAATCCTCTCGCCATCC
923	AATGTATCTCACTAACATTTCTTAAAATAGGTCATCCTCTAAGTTTTAAA	CCACAAAGGGCCGAGTTAAG	AGAGAATCCTCTCGCCATCC	CCACAAAGGGCCGAGTTAAGAATGTATCTCACTAACATTTCTTAAAATAGGTCATCCTCTAAGTTTTAAAAGAGAATCCTCTCGCCATCC
924	AGCGACAGCGGCAACAATGACGATTTGGGTTGTTTTCTTTGTCTCACCTC	CCACAAAGGGCCGAGTTAAG	AGAGAATCCTCTCGCCATCC	CCACAAAGGGCCGAGTTAAGAGCGACAGCGGCAACAATGACGATTTGGGTTGTTTTCTTTGTCTCACCTCAGAGAATCCTCTCGCCATCC
925	TCAATTATCGCCCTTCTATTTTCTCTTCTTAAGTCATCTATAATTTCCCT	CCACAAAGGGCCGAGTTAAG	AGAGAATCCTCTCGCCATCC	CCACAAAGGGCCGAGTTAAGTCAATTATCGCCCTTCTATTTTCTCTTCTTAAGTCATCTATAATTTCCCTAGAGAATCCTCTCGCCATCC
926	CCATCAACATTAATCATCACTTCTAATGCAATATTTGAAGAATATATATA	CCACAAAGGGCCGAGTTAAG	AGAGAATCCTCTCGCCATCC	CCACAAAGGGCCGAGTTAAGCCATCAACATTAATCATCACTTCTAATGCAATATTTGAAGAATATATATAAGAGAATCCTCTCGCCATCC
927	ATGTTTTCTTAAAATATATTATAAGCAACACTACTGTGAGTTCAGTTAAG	CCACAAAGGGCCGAGTTAAG	AGAGAATCCTCTCGCCATCC	CCACAAAGGGCCGAGTTAAGATGTTTTCTTAAAATATATTATAAGCAACACTACTGTGAGTTCAGTTAAGAGAGAATCCTCTCGCCATCC
928	TAATATGTAGAAATTCATCCTCAATAAAACAACTCAAAATTATATCATTT	CCACAAAGGGCCGAGTTAAG	AGAGAATCCTCTCGCCATCC	CCACAAAGGGCCGAGTTAAGTAATATGTAGAAATTCATCCTCAATAAAACAACTCAAAATTATATCATTTAGAGAATCCTCTCGCCATCC
929	ACTCATCTTGATTATATTTTGTTTCAGCTTACACCAACGAGAACAAGGTA	CCACAAAGGGCCGAGTTAAG	AGAGAATCCTCTCGCCATCC	CCACAAAGGGCCGAGTTAAGACTCATCTTGATTATATTTTGTTTCAGCTTACACCAACGAGAACAAGGTAAGAGAATCCTCTCGCCATCC
930	AAAGAAATGGTTCAAGTAGTCCTGAAGCTAATTTCTCCTTCTTGTTGTTA	CCACAAAGGGCCGAGTTAAG	AGAGAATCCTCTCGCCATCC	CCACAAAGGGCCGAGTTAAGAAAGAAATGGTTCAAGTAGTCCTGAAGCTAATTTCTCCTTCTTGTTGTTAAGAGAATCCTCTCGCCATCC
931	TATGTAATTGGGATAATCAGCATGGAACCTTTAGACCTGAGTTGGAAATT	CCACAAAGGGCCGAGTTAAG	AGAGAATCCTCTCGCCATCC	CCACAAAGGGCCGAGTTAAGTATGTAATTGGGATAATCAGCATGGAACCTTTAGACCTGAGTTGGAAATTAGAGAATCCTCTCGCCATCC
932	GTCATTTGAGAGACGCCATAAATCAAAATCCCATAGAAACAAGAGAAAAG	CCACAAAGGGCCGAGTTAAG	AGAGAATCCTCTCGCCATCC	CCACAAAGGGCCGAGTTAAGGTCATTTGAGAGACGCCATAAATCAAAATCCCATAGAAACAAGAGAAAAGAGAGAATCCTCTCGCCATCC
933	GTCTTACCTACCTAATAACCCCATTGTTTCTTGATGTCCTTCCCTCCTTA	CCACAAAGGGCCGAGTTAAG	AGAGAATCCTCTCGCCATCC	CCACAAAGGGCCGAGTTAAGGTCTTACCTACCTAATAACCCCATTGTTTCTTGATGTCCTTCCCTCCTTAAGAGAATCCTCTCGCCATCC
934	TTAATGCTTTTGAAACAAAATCAAGTATGGTAATCAAAGATTTAGAGAGC	CCACAAAGGGCCGAGTTAAG	AGAGAATCCTCTCGCCATCC	CCACAAAGGGCCGAGTTAAGTTAATGCTTTTGAAACAAAATCAAGTATGGTAATCAAAGATTTAGAGAGCAGAGAATCCTCTCGCCATCC
935	TTGTGAAGCTGCTGAACAAGAGAACACCTGTTAACAAATTACCTGCTTAA	CCACAAAGGGCCGAGTTAAG	AGAGAATCCTCTCGCCATCC	CCACAAAGGGCCGAGTTAAGTTGTGAAGCTGCTGAACAAGAGAACACCTGTTAACAAATTACCTGCTTAAAGAGAATCCTCTCGCCATCC
936	TCTTAATAACCTAACCTATAGACTCACTCGCACATCACCGCTAAGCTAAA	CCACAAAGGGCCGAGTTAAG	AGAGAATCCTCTCGCCATCC	CCACAAAGGGCCGAGTTAAGTCTTAATAACCTAACCTATAGACTCACTCGCACATCACCGCTAAGCTAAAAGAGAATCCTCTCGCCATCC
937	CTGTAGAAAGCATTATAATCCAGAAACTGTATATTTATATATGCAGCTGC	CCACAAAGGGCCGAGTTAAG	AGAGAATCCTCTCGCCATCC	CCACAAAGGGCCGAGTTAAGCTGTAGAAAGCATTATAATCCAGAAACTGTATATTTATATATGCAGCTGCAGAGAATCCTCTCGCCATCC
938	TACAGATTCAATAACCTCATGAGTCTTAAATCTTAACAATTTAGAATGTG	CCACAAAGGGCCGAGTTAAG	AGAGAATCCTCTCGCCATCC	CCACAAAGGGCCGAGTTAAGTACAGATTCAATAACCTCATGAGTCTTAAATCTTAACAATTTAGAATGTGAGAGAATCCTCTCGCCATCC
939	CCTGTATTTGGTGTGATAAGCATTTCTAACTGAACCAGCAAGCAAGCATG	CCACAAAGGGCCGAGTTAAG	AGAGAATCCTCTCGCCATCC	CCACAAAGGGCCGAGTTAAGCCTGTATTTGGTGTGATAAGCATTTCTAACTGAACCAGCAAGCAAGCATGAGAGAATCCTCTCGCCATCC
940	GAAAGTGAGAGAAAGTGTGTTTCATGAGGCACGAGTTGACACCCAAAATT	CCACAAAGGGCCGAGTTAAG	AGAGAATCCTCTCGCCATCC	CCACAAAGGGCCGAGTTAAGGAAAGTGAGAGAAAGTGTGTTTCATGAGGCACGAGTTGACACCCAAAATTAGAGAATCCTCTCGCCATCC
941	GTAACAATTAGTATTAGAACCCAATGACTCGTCCAAAACATAGGAGCTAA	CCACAAAGGGCCGAGTTAAG	AGAGAATCCTCTCGCCATCC	CCACAAAGGGCCGAGTTAAGGTAACAATTAGTATTAGAACCCAATGACTCGTCCAAAACATAGGAGCTAAAGAGAATCCTCTCGCCATCC
942	TTGCCCAACCCCTTCTATATCTGTCCTAGCATTTACTCACCCTCATTGTC	CCACAAAGGGCCGAGTTAAG	AGAGAATCCTCTCGCCATCC	CCACAAAGGGCCGAGTTAAGTTGCCCAACCCCTTCTATATCTGTCCTAGCATTTACTCACCCTCATTGTCAGAGAATCCTCTCGCCATCC
943	TTCCATATTGATATCACTTCTTCTATGTATGCTCAATCCTCTAGATCTTC	CCACAAAGGGCCGAGTTAAG	AGAGAATCCTCTCGCCATCC	CCACAAAGGGCCGAGTTAAGTTCCATATTGATATCACTTCTTCTATGTATGCTCAATCCTCTAGATCTTCAGAGAATCCTCTCGCCATCC
944	AATAGATACATGGACAAAATGGCGCCTTTGGAACACAATTCAATGTTTGA	CCACAAAGGGCCGAGTTAAG	AGAGAATCCTCTCGCCATCC	CCACAAAGGGCCGAGTTAAGAATAGATACATGGACAAAATGGCGCCTTTGGAACACAATTCAATGTTTGAAGAGAATCCTCTCGCCATCC
945	CTTCAAACTCCAACTATGATCATGCTCAATTACAAAACTATCAAGAATGG	CCACAAAGGGCCGAGTTAAG	AGAGAATCCTCTCGCCATCC	CCACAAAGGGCCGAGTTAAGCTTCAAACTCCAACTATGATCATGCTCAATTACAAAACTATCAAGAATGGAGAGAATCCTCTCGCCATCC
946	TTTATATAGAAAATAAAAGACATTATAAATACACATGAAAGATATCATAA	CCACAAAGGGCCGAGTTAAG	AGAGAATCCTCTCGCCATCC	CCACAAAGGGCCGAGTTAAGTTTATATAGAAAATAAAAGACATTATAAATACACATGAAAGATATCATAAAGAGAATCCTCTCGCCATCC
947	TGTTAGCTAAAAGTACTCTCTCAATAAGTTTTCACACAAGAGATAAATTT	CCACAAAGGGCCGAGTTAAG	AGAGAATCCTCTCGCCATCC	CCACAAAGGGCCGAGTTAAGTGTTAGCTAAAAGTACTCTCTCAATAAGTTTTCACACAAGAGATAAATTTAGAGAATCCTCTCGCCATCC
948	CACAACAAATTACATAAATGTCAAGAATAGCGTTATAGCTTGATTAAAAT	CCACAAAGGGCCGAGTTAAG	AGAGAATCCTCTCGCCATCC	CCACAAAGGGCCGAGTTAAGCACAACAAATTACATAAATGTCAAGAATAGCGTTATAGCTTGATTAAAATAGAGAATCCTCTCGCCATCC
949	TAAATATCAAACAAATTAAATACACAATTTAGTAATGGGTAAACTTGACT	CCACAAAGGGCCGAGTTAAG	AGAGAATCCTCTCGCCATCC	CCACAAAGGGCCGAGTTAAGTAAATATCAAACAAATTAAATACACAATTTAGTAATGGGTAAACTTGACTAGAGAATCCTCTCGCCATCC
950	AACTAGGAAATTAAGAGCATGTTAGGAGAATAATAATCAAAGAAAGAAGA	CCACAAAGGGCCGAGTTAAG	AGAGAATCCTCTCGCCATCC	CCACAAAGGGCCGAGTTAAGAACTAGGAAATTAAGAGCATGTTAGGAGAATAATAATCAAAGAAAGAAGAAGAGAATCCTCTCGCCATCC
951	ATTAATTAGGTTGTGAATCTCCTCTCGTCATTCTTTCCATTTGGGGTCAT	CCACAAAGGGCCGAGTTAAG	AGAGAATCCTCTCGCCATCC	CCACAAAGGGCCGAGTTAAGATTAATTAGGTTGTGAATCTCCTCTCGTCATTCTTTCCATTTGGGGTCATAGAGAATCCTCTCGCCATCC
952	TCACTCCAACTGCTTATGGGGACCACCTCATCAATCTTATTATATATATA	CCACAAAGGGCCGAGTTAAG	AGAGAATCCTCTCGCCATCC	CCACAAAGGGCCGAGTTAAGTCACTCCAACTGCTTATGGGGACCACCTCATCAATCTTATTATATATATAAGAGAATCCTCTCGCCATCC
953	AATTTGGTAGAACTTATAATCATCTATATTTTCTTATAAAGACTAAAATG	CCACAAAGGGCCGAGTTAAG	AGAGAATCCTCTCGCCATCC	CCACAAAGGGCCGAGTTAAGAATTTGGTAGAACTTATAATCATCTATATTTTCTTATAAAGACTAAAATGAGAGAATCCTCTCGCCATCC
954	ATGAGGGAGTAGCCGATTTAATTGAAAGAATATTTGGACGCTTATACTCA	CCACAAAGGGCCGAGTTAAG	AGAGAATCCTCTCGCCATCC	CCACAAAGGGCCGAGTTAAGATGAGGGAGTAGCCGATTTAATTGAAAGAATATTTGGACGCTTATACTCAAGAGAATCCTCTCGCCATCC
955	TGGTGCTGTAATTGTAAATAGTCATCAACATAGTAGTCAAATTTGTGATG	CCACAAAGGGCCGAGTTAAG	AGAGAATCCTCTCGCCATCC	CCACAAAGGGCCGAGTTAAGTGGTGCTGTAATTGTAAATAGTCATCAACATAGTAGTCAAATTTGTGATGAGAGAATCCTCTCGCCATCC
956	GTGCAGTAAGTTCTTTGTGAGATTTTCCATATTGTCTTACCCGAACTCTT	CCACAAAGGGCCGAGTTAAG	AGAGAATCCTCTCGCCATCC	CCACAAAGGGCCGAGTTAAGGTGCAGTAAGTTCTTTGTGAGATTTTCCATATTGTCTTACCCGAACTCTTAGAGAATCCTCTCGCCATCC
957	TATTCATGTCTGGCAGGTTGTTGAATCAGAGAGAAAGGGTGATTTATTGT	CCACAAAGGGCCGAGTTAAG	AGAGAATCCTCTCGCCATCC	CCACAAAGGGCCGAGTTAAGTATTCATGTCTGGCAGGTTGTTGAATCAGAGAGAAAGGGTGATTTATTGTAGAGAATCCTCTCGCCATCC
958	CACTAGTAACTTATCCATCAAAATAACCACACCAAGAAGAAAATGTTTAG	CCACAAAGGGCCGAGTTAAG	AGAGAATCCTCTCGCCATCC	CCACAAAGGGCCGAGTTAAGCACTAGTAACTTATCCATCAAAATAACCACACCAAGAAGAAAATGTTTAGAGAGAATCCTCTCGCCATCC
959	AAACATTTTAAATACTATGAGATGCATTTTCCTTTTGATTATGTATCATT	CCACAAAGGGCCGAGTTAAG	AGAGAATCCTCTCGCCATCC	CCACAAAGGGCCGAGTTAAGAAACATTTTAAATACTATGAGATGCATTTTCCTTTTGATTATGTATCATTAGAGAATCCTCTCGCCATCC
960	GACATAATAAATCTGCAATATTAAATAAGTATAGTATAGCGTTTGTCCTA	CCACAAAGGGCCGAGTTAAG	AGAGAATCCTCTCGCCATCC	CCACAAAGGGCCGAGTTAAGGACATAATAAATCTGCAATATTAAATAAGTATAGTATAGCGTTTGTCCTAAGAGAATCCTCTCGCCATCC
961	AGCAGTAAGTGAAGCAGATATTTGACTGTTTGTATTTCGAAATCCTGTTA	CCACAAAGGGCCGAGTTAAG	AGAGAATCCTCTCGCCATCC	CCACAAAGGGCCGAGTTAAGAGCAGTAAGTGAAGCAGATATTTGACTGTTTGTATTTCGAAATCCTGTTAAGAGAATCCTCTCGCCATCC
962	CACCTGTTGAAGATACGAATGGAAGCGAGAGTTCACCAATGGCATCCGTA	CCACAAAGGGCCGAGTTAAG	AGAGAATCCTCTCGCCATCC	CCACAAAGGGCCGAGTTAAGCACCTGTTGAAGATACGAATGGAAGCGAGAGTTCACCAATGGCATCCGTAAGAGAATCCTCTCGCCATCC
963	AGAATAGATCATCCTTCTCCGAGTAGCACCCAAGCACAATAAAGAAATGT	CCACAAAGGGCCGAGTTAAG	AGAGAATCCTCTCGCCATCC	CCACAAAGGGCCGAGTTAAGAGAATAGATCATCCTTCTCCGAGTAGCACCCAAGCACAATAAAGAAATGTAGAGAATCCTCTCGCCATCC
964	AAGGAGAAGTAAGTGCAGAGTATTTAAAGTCAGTGTTCCAAATGAGTTGT	CCACAAAGGGCCGAGTTAAG	AGAGAATCCTCTCGCCATCC	CCACAAAGGGCCGAGTTAAGAAGGAGAAGTAAGTGCAGAGTATTTAAAGTCAGTGTTCCAAATGAGTTGTAGAGAATCCTCTCGCCATCC
965	ATTTCCAGCCAATGTGTTTGTGTTACCTGAAATGTATGTATTGTCAGACC	CCACAAAGGGCCGAGTTAAG	AGAGAATCCTCTCGCCATCC	CCACAAAGGGCCGAGTTAAGATTTCCAGCCAATGTGTTTGTGTTACCTGAAATGTATGTATTGTCAGACCAGAGAATCCTCTCGCCATCC
966	ACTTCTCTGTAAAATCTTTATCCATTGGAGAAAATCAATAACTTAGTGTT	CCACAAAGGGCCGAGTTAAG	AGAGAATCCTCTCGCCATCC	CCACAAAGGGCCGAGTTAAGACTTCTCTGTAAAATCTTTATCCATTGGAGAAAATCAATAACTTAGTGTTAGAGAATCCTCTCGCCATCC
967	TAGCTGGGATTATGCATGTATTGATGGATATGGAATTGAAGCCAGATGAG	CCACAAAGGGCCGAGTTAAG	AGAGAATCCTCTCGCCATCC	CCACAAAGGGCCGAGTTAAGTAGCTGGGATTATGCATGTATTGATGGATATGGAATTGAAGCCAGATGAGAGAGAATCCTCTCGCCATCC
968	GAAGTGCCCAAATGGTCCATCTGTGAAGTTTCTAGTGAATGCAGGTTGGT	CCACAAAGGGCCGAGTTAAG	AGAGAATCCTCTCGCCATCC	CCACAAAGGGCCGAGTTAAGGAAGTGCCCAAATGGTCCATCTGTGAAGTTTCTAGTGAATGCAGGTTGGTAGAGAATCCTCTCGCCATCC
969	GCTTTTAAGGCTCCGTTATTTGTACATGTAATTCTCCGTCCCACTTCAAA	CCACAAAGGGCCGAGTTAAG	AGAGAATCCTCTCGCCATCC	CCACAAAGGGCCGAGTTAAGGCTTTTAAGGCTCCGTTATTTGTACATGTAATTCTCCGTCCCACTTCAAAAGAGAATCCTCTCGCCATCC
970	TACTAGAAATAAAATTAGTTATGTTGGCGATATTTCATAAAGCGTTTGCT	CCACAAAGGGCCGAGTTAAG	AGAGAATCCTCTCGCCATCC	CCACAAAGGGCCGAGTTAAGTACTAGAAATAAAATTAGTTATGTTGGCGATATTTCATAAAGCGTTTGCTAGAGAATCCTCTCGCCATCC
971	TTTATTTTGATGAATATTCCACTTAAAACAAAAGAAGGGTTGAACAATCC	CCACAAAGGGCCGAGTTAAG	AGAGAATCCTCTCGCCATCC	CCACAAAGGGCCGAGTTAAGTTTATTTTGATGAATATTCCACTTAAAACAAAAGAAGGGTTGAACAATCCAGAGAATCCTCTCGCCATCC
972	CACTGATCTCGCAGATTACTACAAACCTCCACATTCCGAATGGTGCTTAA	CCACAAAGGGCCGAGTTAAG	AGAGAATCCTCTCGCCATCC	CCACAAAGGGCCGAGTTAAGCACTGATCTCGCAGATTACTACAAACCTCCACATTCCGAATGGTGCTTAAAGAGAATCCTCTCGCCATCC
973	TTGACGCACCACGAGACGGGCCCTTGAAGTTCCATATCTCCAACCAATCC	CCACAAAGGGCCGAGTTAAG	AGAGAATCCTCTCGCCATCC	CCACAAAGGGCCGAGTTAAGTTGACGCACCACGAGACGGGCCCTTGAAGTTCCATATCTCCAACCAATCCAGAGAATCCTCTCGCCATCC
974	AAGACAAAACCTGATGAGATGTGCAATGACTTATCTTCACTCTTCACTTT	CCACAAAGGGCCGAGTTAAG	AGAGAATCCTCTCGCCATCC	CCACAAAGGGCCGAGTTAAGAAGACAAAACCTGATGAGATGTGCAATGACTTATCTTCACTCTTCACTTTAGAGAATCCTCTCGCCATCC
975	AGAGATAACTAAAATATTTGAACTGTCAGTCACAAAACTTTTCTGCATAG	CCACAAAGGGCCGAGTTAAG	AGAGAATCCTCTCGCCATCC	CCACAAAGGGCCGAGTTAAGAGAGATAACTAAAATATTTGAACTGTCAGTCACAAAACTTTTCTGCATAGAGAGAATCCTCTCGCCATCC
976	AAAATTGTGTTTGATGAAGAGAAAGAAGATATAAGGTGACATGTGCCTAT	CCACAAAGGGCCGAGTTAAG	AGAGAATCCTCTCGCCATCC	CCACAAAGGGCCGAGTTAAGAAAATTGTGTTTGATGAAGAGAAAGAAGATATAAGGTGACATGTGCCTATAGAGAATCCTCTCGCCATCC
977	ATGCTTGAAGTTACGTGATTAAATATGTTTACATTTATGCATCTGATTAA	CCACAAAGGGCCGAGTTAAG	AGAGAATCCTCTCGCCATCC	CCACAAAGGGCCGAGTTAAGATGCTTGAAGTTACGTGATTAAATATGTTTACATTTATGCATCTGATTAAAGAGAATCCTCTCGCCATCC
978	TTAGGAATTTATGGGTAAAAGTAACTCCTAATACAAATCAGTAACATCAA	CCACAAAGGGCCGAGTTAAG	AGAGAATCCTCTCGCCATCC	CCACAAAGGGCCGAGTTAAGTTAGGAATTTATGGGTAAAAGTAACTCCTAATACAAATCAGTAACATCAAAGAGAATCCTCTCGCCATCC
979	TTCTTCCTTGTGATTTGAATCTTATTTTGCTATGGTGGAGAAATAATCTT	CCACAAAGGGCCGAGTTAAG	AGAGAATCCTCTCGCCATCC	CCACAAAGGGCCGAGTTAAGTTCTTCCTTGTGATTTGAATCTTATTTTGCTATGGTGGAGAAATAATCTTAGAGAATCCTCTCGCCATCC
980	CACTGCCATCCATTTCATCAATTACCCAAACGTAGCTAACCCGATGTGCG	CCACAAAGGGCCGAGTTAAG	AGAGAATCCTCTCGCCATCC	CCACAAAGGGCCGAGTTAAGCACTGCCATCCATTTCATCAATTACCCAAACGTAGCTAACCCGATGTGCGAGAGAATCCTCTCGCCATCC
981	AGAGATACACTGACTGAGGAGTATTCTGTTATGTTCTTATAGTTTATTCT	CCACAAAGGGCCGAGTTAAG	AGAGAATCCTCTCGCCATCC	CCACAAAGGGCCGAGTTAAGAGAGATACACTGACTGAGGAGTATTCTGTTATGTTCTTATAGTTTATTCTAGAGAATCCTCTCGCCATCC
982	TGAAAAGGAAGTTCAATATACAAATCATCTGTTTCTCCATAATACTTTAC	CCACAAAGGGCCGAGTTAAG	AGAGAATCCTCTCGCCATCC	CCACAAAGGGCCGAGTTAAGTGAAAAGGAAGTTCAATATACAAATCATCTGTTTCTCCATAATACTTTACAGAGAATCCTCTCGCCATCC
983	AAGTATGGAAGAAGATACATATTACTTTCTCTAAGGAAATCGATATCCAC	CCACAAAGGGCCGAGTTAAG	AGAGAATCCTCTCGCCATCC	CCACAAAGGGCCGAGTTAAGAAGTATGGAAGAAGATACATATTACTTTCTCTAAGGAAATCGATATCCACAGAGAATCCTCTCGCCATCC
984	TCTTCGATTCAGATCATATGTAAGTCAAACGTATGATAAAAGTGACGAGG	CCACAAAGGGCCGAGTTAAG	AGAGAATCCTCTCGCCATCC	CCACAAAGGGCCGAGTTAAGTCTTCGATTCAGATCATATGTAAGTCAAACGTATGATAAAAGTGACGAGGAGAGAATCCTCTCGCCATCC
985	GACATTATCATGAATTGTTGACAGAGTTTAATACCTACCATCAAACCCTA	CCACAAAGGGCCGAGTTAAG	AGAGAATCCTCTCGCCATCC	CCACAAAGGGCCGAGTTAAGGACATTATCATGAATTGTTGACAGAGTTTAATACCTACCATCAAACCCTAAGAGAATCCTCTCGCCATCC
986	GTATAGACCAGTGCTAACTTGAGAGATGTGGTGACCTTTTAAGCAGTCAA	CCACAAAGGGCCGAGTTAAG	AGAGAATCCTCTCGCCATCC	CCACAAAGGGCCGAGTTAAGGTATAGACCAGTGCTAACTTGAGAGATGTGGTGACCTTTTAAGCAGTCAAAGAGAATCCTCTCGCCATCC
987	TATTGCTATTGGGTTTAGTTCAAAGTAGTTAGTTATCCTCTTGCAAACAA	CCACAAAGGGCCGAGTTAAG	AGAGAATCCTCTCGCCATCC	CCACAAAGGGCCGAGTTAAGTATTGCTATTGGGTTTAGTTCAAAGTAGTTAGTTATCCTCTTGCAAACAAAGAGAATCCTCTCGCCATCC
988	CTCGTCGCCAGCAGAGACCCTAACAACATGAATTCCCTTTCTCCTAAATG	CCACAAAGGGCCGAGTTAAG	AGAGAATCCTCTCGCCATCC	CCACAAAGGGCCGAGTTAAGCTCGTCGCCAGCAGAGACCCTAACAACATGAATTCCCTTTCTCCTAAATGAGAGAATCCTCTCGCCATCC
989	TGCATAAACTTGTTTCATTTCCAAAACCAAGAACATATGTTGCAGAAGAT	CCACAAAGGGCCGAGTTAAG	AGAGAATCCTCTCGCCATCC	CCACAAAGGGCCGAGTTAAGTGCATAAACTTGTTTCATTTCCAAAACCAAGAACATATGTTGCAGAAGATAGAGAATCCTCTCGCCATCC
990	GGAATGCCTTTTAGTGCTTCAACAAGACGAGGCCTGAATATTGGACGGTT	CCACAAAGGGCCGAGTTAAG	AGAGAATCCTCTCGCCATCC	CCACAAAGGGCCGAGTTAAGGGAATGCCTTTTAGTGCTTCAACAAGACGAGGCCTGAATATTGGACGGTTAGAGAATCCTCTCGCCATCC
991	TAGACTTTTGGTTATCCTGAATTCCATGTGGCAGAAAGGAAACAACTTAA	CCACAAAGGGCCGAGTTAAG	AGAGAATCCTCTCGCCATCC	CCACAAAGGGCCGAGTTAAGTAGACTTTTGGTTATCCTGAATTCCATGTGGCAGAAAGGAAACAACTTAAAGAGAATCCTCTCGCCATCC
992	TGCTGGTTATTAAGCTACCATTTTCCTCATGCCAAAATAGCTAGAGATTT	CCACAAAGGGCCGAGTTAAG	AGAGAATCCTCTCGCCATCC	CCACAAAGGGCCGAGTTAAGTGCTGGTTATTAAGCTACCATTTTCCTCATGCCAAAATAGCTAGAGATTTAGAGAATCCTCTCGCCATCC
993	TTAATAACTAACACACGAACCTCCACTGAATAGAATAGAACTCATAGATA	CCACAAAGGGCCGAGTTAAG	AGAGAATCCTCTCGCCATCC	CCACAAAGGGCCGAGTTAAGTTAATAACTAACACACGAACCTCCACTGAATAGAATAGAACTCATAGATAAGAGAATCCTCTCGCCATCC
994	AAACCGAAGACAATTTAGACAGTTTATAAAGGAAATATCAGAATGGAGAA	CCACAAAGGGCCGAGTTAAG	AGAGAATCCTCTCGCCATCC	CCACAAAGGGCCGAGTTAAGAAACCGAAGACAATTTAGACAGTTTATAAAGGAAATATCAGAATGGAGAAAGAGAATCCTCTCGCCATCC
995	ATTTCTGTCAAATCTTTCAAAGTAGATCTGGGTTGGATAAATTTCTAACA	CCACAAAGGGCCGAGTTAAG	AGAGAATCCTCTCGCCATCC	CCACAAAGGGCCGAGTTAAGATTTCTGTCAAATCTTTCAAAGTAGATCTGGGTTGGATAAATTTCTAACAAGAGAATCCTCTCGCCATCC
996	GCCCAAATATAACTAAATTATTCCCAACCTCTAAAGCCAATGATGTTTGT	CCACAAAGGGCCGAGTTAAG	AGAGAATCCTCTCGCCATCC	CCACAAAGGGCCGAGTTAAGGCCCAAATATAACTAAATTATTCCCAACCTCTAAAGCCAATGATGTTTGTAGAGAATCCTCTCGCCATCC
997	TATAAGTTAAAAGACTAATTTAGCCAATTTACCTTATTCTTTTACCCCGC	CCACAAAGGGCCGAGTTAAG	AGAGAATCCTCTCGCCATCC	CCACAAAGGGCCGAGTTAAGTATAAGTTAAAAGACTAATTTAGCCAATTTACCTTATTCTTTTACCCCGCAGAGAATCCTCTCGCCATCC
998	TATGTACAGTATTTGCTACAAAATCTATGAAAGTTTCTTTCTTCAGCTTT	CCACAAAGGGCCGAGTTAAG	AGAGAATCCTCTCGCCATCC	CCACAAAGGGCCGAGTTAAGTATGTACAGTATTTGCTACAAAATCTATGAAAGTTTCTTTCTTCAGCTTTAGAGAATCCTCTCGCCATCC
999	GAATTAATTAACACCTAGCAATGTCTTGGCGTTTATGGAACAGATGAAAG	CCACAAAGGGCCGAGTTAAG	AGAGAATCCTCTCGCCATCC	CCACAAAGGGCCGAGTTAAGGAATTAATTAACACCTAGCAATGTCTTGGCGTTTATGGAACAGATGAAAGAGAGAATCCTCTCGCCATCC
1000	GGAGAATAAAGAGGAAAAGAATTTAATAGCCACCGAAGAAAATGTCCTTC	CCACAAAGGGCCGAGTTAAG	AGAGAATCCTCTCGCCATCC	CCACAAAGGGCCGAGTTAAGGGAGAATAAAGAGGAAAAGAATTTAATAGCCACCGAAGAAAATGTCCTTCAGAGAATCCTCTCGCCATCC
1001	ATCATCTAGAATAGCTTGATATGAGAAGGTCGAATCAATTTCAATGTCTA	CCACAAAGGGCCGAGTTAAG	AGAGAATCCTCTCGCCATCC	CCACAAAGGGCCGAGTTAAGATCATCTAGAATAGCTTGATATGAGAAGGTCGAATCAATTTCAATGTCTAAGAGAATCCTCTCGCCATCC
1002	ACATATCATGGTCTTCTTTCTTTGCATGTTCTTGTTGGTCTCTCTGGCTT	CCACAAAGGGCCGAGTTAAG	AGAGAATCCTCTCGCCATCC	CCACAAAGGGCCGAGTTAAGACATATCATGGTCTTCTTTCTTTGCATGTTCTTGTTGGTCTCTCTGGCTTAGAGAATCCTCTCGCCATCC
1003	AGATAAAGTAAGATAGCCAATTAGAGGTTATAGAGAGAGAATTTCTTTGT	CCACAAAGGGCCGAGTTAAG	AGAGAATCCTCTCGCCATCC	CCACAAAGGGCCGAGTTAAGAGATAAAGTAAGATAGCCAATTAGAGGTTATAGAGAGAGAATTTCTTTGTAGAGAATCCTCTCGCCATCC
1004	ATTTCCCAGCTCATAATGCTTGTTATATGATAATAAATTGGCCGTGTTTG	CCACAAAGGGCCGAGTTAAG	AGAGAATCCTCTCGCCATCC	CCACAAAGGGCCGAGTTAAGATTTCCCAGCTCATAATGCTTGTTATATGATAATAAATTGGCCGTGTTTGAGAGAATCCTCTCGCCATCC
1005	AATTTTCATACTATTTTGCCGATGTTATGTCTGAATATGGCTAGACCCTC	CCACAAAGGGCCGAGTTAAG	AGAGAATCCTCTCGCCATCC	CCACAAAGGGCCGAGTTAAGAATTTTCATACTATTTTGCCGATGTTATGTCTGAATATGGCTAGACCCTCAGAGAATCCTCTCGCCATCC
1006	TTTAATTTGTTGGCTTTATCTTTATATTGAGTTGCTAATCTGTTGAACAA	CCACAAAGGGCCGAGTTAAG	AGAGAATCCTCTCGCCATCC	CCACAAAGGGCCGAGTTAAGTTTAATTTGTTGGCTTTATCTTTATATTGAGTTGCTAATCTGTTGAACAAAGAGAATCCTCTCGCCATCC
1007	TGAACATATCTTGTCCGAAGTTTTACATTTTATTGGCTCTCCCAGAAAAT	CCACAAAGGGCCGAGTTAAG	AGAGAATCCTCTCGCCATCC	CCACAAAGGGCCGAGTTAAGTGAACATATCTTGTCCGAAGTTTTACATTTTATTGGCTCTCCCAGAAAATAGAGAATCCTCTCGCCATCC
1008	ATTATACAGTAGTTATATCTGAAGCTTGTTAACACCTTGACACATGTTTT	CCACAAAGGGCCGAGTTAAG	AGAGAATCCTCTCGCCATCC	CCACAAAGGGCCGAGTTAAGATTATACAGTAGTTATATCTGAAGCTTGTTAACACCTTGACACATGTTTTAGAGAATCCTCTCGCCATCC
1009	GGAGACGCTACATTAAATAATTTCTGGACTATGGTTAAGTAACTAGCATT	CCACAAAGGGCCGAGTTAAG	AGAGAATCCTCTCGCCATCC	CCACAAAGGGCCGAGTTAAGGGAGACGCTACATTAAATAATTTCTGGACTATGGTTAAGTAACTAGCATTAGAGAATCCTCTCGCCATCC
1010	AACTGTTTATTTAATTTAATGAACCATAAATGATGTCATGTCCTACTAAT	CCACAAAGGGCCGAGTTAAG	AGAGAATCCTCTCGCCATCC	CCACAAAGGGCCGAGTTAAGAACTGTTTATTTAATTTAATGAACCATAAATGATGTCATGTCCTACTAATAGAGAATCCTCTCGCCATCC
1011	CATAATATATAAACTTTCCATCAAATCATATCATAATGAAATTCAACTTG	CCACAAAGGGCCGAGTTAAG	AGAGAATCCTCTCGCCATCC	CCACAAAGGGCCGAGTTAAGCATAATATATAAACTTTCCATCAAATCATATCATAATGAAATTCAACTTGAGAGAATCCTCTCGCCATCC
1012	GCAAAAGCCAAAGAGCCCAATGCAATGTATGAGCTGTTCCGAACCCAAAA	CCACAAAGGGCCGAGTTAAG	AGAGAATCCTCTCGCCATCC	CCACAAAGGGCCGAGTTAAGGCAAAAGCCAAAGAGCCCAATGCAATGTATGAGCTGTTCCGAACCCAAAAAGAGAATCCTCTCGCCATCC
1013	AAAATTTCATCATCTTCCATAAAAGTACCTCTCAGCTGATTGTCTTGTTT	CCACAAAGGGCCGAGTTAAG	AGAGAATCCTCTCGCCATCC	CCACAAAGGGCCGAGTTAAGAAAATTTCATCATCTTCCATAAAAGTACCTCTCAGCTGATTGTCTTGTTTAGAGAATCCTCTCGCCATCC
1014	GAGGAATCAGAGCTGCTTTGTAGTTTGAACCCATCTGAAAATAACAGGTT	CCACAAAGGGCCGAGTTAAG	AGAGAATCCTCTCGCCATCC	CCACAAAGGGCCGAGTTAAGGAGGAATCAGAGCTGCTTTGTAGTTTGAACCCATCTGAAAATAACAGGTTAGAGAATCCTCTCGCCATCC
1015	AACTAACTAGGAAATGCAAATCAACTGAGGTTTTCTTTTCATGTTCAATA	CCACAAAGGGCCGAGTTAAG	AGAGAATCCTCTCGCCATCC	CCACAAAGGGCCGAGTTAAGAACTAACTAGGAAATGCAAATCAACTGAGGTTTTCTTTTCATGTTCAATAAGAGAATCCTCTCGCCATCC
1016	AGATGTCTGAATGTGCTTGTCTAATGTCTCATTTTCTTATTTAAAATTTT	CCACAAAGGGCCGAGTTAAG	AGAGAATCCTCTCGCCATCC	CCACAAAGGGCCGAGTTAAGAGATGTCTGAATGTGCTTGTCTAATGTCTCATTTTCTTATTTAAAATTTTAGAGAATCCTCTCGCCATCC
1017	ATAATGTTAATGAGATCCAGTACACACAGTGATCAGGCATATTTCTCTTC	CCACAAAGGGCCGAGTTAAG	AGAGAATCCTCTCGCCATCC	CCACAAAGGGCCGAGTTAAGATAATGTTAATGAGATCCAGTACACACAGTGATCAGGCATATTTCTCTTCAGAGAATCCTCTCGCCATCC
1018	CTTATGAAAGTGGATAAAATATGGCCCATCACTCAGAAATGATCCGTTAT	CCACAAAGGGCCGAGTTAAG	AGAGAATCCTCTCGCCATCC	CCACAAAGGGCCGAGTTAAGCTTATGAAAGTGGATAAAATATGGCCCATCACTCAGAAATGATCCGTTATAGAGAATCCTCTCGCCATCC
1019	GGCTCATTATTAACACACTTGAACTCCTTTATACTCTAAATTGAACAAAA	CCACAAAGGGCCGAGTTAAG	AGAGAATCCTCTCGCCATCC	CCACAAAGGGCCGAGTTAAGGGCTCATTATTAACACACTTGAACTCCTTTATACTCTAAATTGAACAAAAAGAGAATCCTCTCGCCATCC
1020	ATGAGTTTGGTTAGATTGATTTGTGATCTAGGTTGGTAGAGGTGTGCAAG	CCACAAAGGGCCGAGTTAAG	AGAGAATCCTCTCGCCATCC	CCACAAAGGGCCGAGTTAAGATGAGTTTGGTTAGATTGATTTGTGATCTAGGTTGGTAGAGGTGTGCAAGAGAGAATCCTCTCGCCATCC
1021	ACCAAAATTTCATCATATCTAGCTAACAACTTCCATTAAATTATTCTACA	CCACAAAGGGCCGAGTTAAG	AGAGAATCCTCTCGCCATCC	CCACAAAGGGCCGAGTTAAGACCAAAATTTCATCATATCTAGCTAACAACTTCCATTAAATTATTCTACAAGAGAATCCTCTCGCCATCC
1022	CCTATTTATCTTTTCCACAGCTAACACAACCCCAACCGGTACGAGTGAAG	CCACAAAGGGCCGAGTTAAG	AGAGAATCCTCTCGCCATCC	CCACAAAGGGCCGAGTTAAGCCTATTTATCTTTTCCACAGCTAACACAACCCCAACCGGTACGAGTGAAGAGAGAATCCTCTCGCCATCC
1023	CCATAATGTTCAAAGTCTGAGTTCCTTATTTCCTTCCACTTGTTTGAAGT	CCACAAAGGGCCGAGTTAAG	AGAGAATCCTCTCGCCATCC	CCACAAAGGGCCGAGTTAAGCCATAATGTTCAAAGTCTGAGTTCCTTATTTCCTTCCACTTGTTTGAAGTAGAGAATCCTCTCGCCATCC
1024	AGCTTATTGTCGATCAGGCCGTGACCTAGATGCTGCTGGTGAGATCCTCT	CCACAAAGGGCCGAGTTAAG	AGAGAATCCTCTCGCCATCC	CCACAAAGGGCCGAGTTAAGAGCTTATTGTCGATCAGGCCGTGACCTAGATGCTGCTGGTGAGATCCTCTAGAGAATCCTCTCGCCATCC
1025	AGAAAAGAAATTCAAGAAATAAACATTGGGATTAAGTCTTTATGTCTTTA	CCACAAAGGGCCGAGTTAAG	AGAGAATCCTCTCGCCATCC	CCACAAAGGGCCGAGTTAAGAGAAAAGAAATTCAAGAAATAAACATTGGGATTAAGTCTTTATGTCTTTAAGAGAATCCTCTCGCCATCC
1026	AAGTAGCACCTGAAATTGTACGTTTCTATTTGCTTATTGATTTATTTGAT	CCACAAAGGGCCGAGTTAAG	AGAGAATCCTCTCGCCATCC	CCACAAAGGGCCGAGTTAAGAAGTAGCACCTGAAATTGTACGTTTCTATTTGCTTATTGATTTATTTGATAGAGAATCCTCTCGCCATCC
1027	AAACTGTAGAGATGCAAAGCTCGTACCAAGACACACAAGGGGCAATCACT	CCACAAAGGGCCGAGTTAAG	AGAGAATCCTCTCGCCATCC	CCACAAAGGGCCGAGTTAAGAAACTGTAGAGATGCAAAGCTCGTACCAAGACACACAAGGGGCAATCACTAGAGAATCCTCTCGCCATCC
1028	TCCTCAACCTACAAATACTTTCTTGCTGTGAGGAGTTGTTGTGATATACT	CCACAAAGGGCCGAGTTAAG	AGAGAATCCTCTCGCCATCC	CCACAAAGGGCCGAGTTAAGTCCTCAACCTACAAATACTTTCTTGCTGTGAGGAGTTGTTGTGATATACTAGAGAATCCTCTCGCCATCC
1029	AGAAAGGGTGAATCAGAGCCACTTCATTTTACTTACAGATTCAGATATCA	CCACAAAGGGCCGAGTTAAG	AGAGAATCCTCTCGCCATCC	CCACAAAGGGCCGAGTTAAGAGAAAGGGTGAATCAGAGCCACTTCATTTTACTTACAGATTCAGATATCAAGAGAATCCTCTCGCCATCC
1030	ATCTGAATAAAGATGAAGAACACTGGCTAAACAATTTGAGCATCTCCAAA	CCACAAAGGGCCGAGTTAAG	AGAGAATCCTCTCGCCATCC	CCACAAAGGGCCGAGTTAAGATCTGAATAAAGATGAAGAACACTGGCTAAACAATTTGAGCATCTCCAAAAGAGAATCCTCTCGCCATCC
1031	CAAGTTCATCAACTACAATATCATCCTCATTTTCATCAACTTCTTCTTCA	CCACAAAGGGCCGAGTTAAG	AGAGAATCCTCTCGCCATCC	CCACAAAGGGCCGAGTTAAGCAAGTTCATCAACTACAATATCATCCTCATTTTCATCAACTTCTTCTTCAAGAGAATCCTCTCGCCATCC
1032	TGCAAGAATGGCATATGGTATGACCGGAAAGATAATCAATGCTTGGACCT	CCACAAAGGGCCGAGTTAAG	AGAGAATCCTCTCGCCATCC	CCACAAAGGGCCGAGTTAAGTGCAAGAATGGCATATGGTATGACCGGAAAGATAATCAATGCTTGGACCTAGAGAATCCTCTCGCCATCC
1033	ATGACTCACCTCCTGAATAACATATCATTACTTAAGGAATCAGCAGAAAT	CCACAAAGGGCCGAGTTAAG	AGAGAATCCTCTCGCCATCC	CCACAAAGGGCCGAGTTAAGATGACTCACCTCCTGAATAACATATCATTACTTAAGGAATCAGCAGAAATAGAGAATCCTCTCGCCATCC
1034	AGAATATACAGCATTGGTGCACCCTGCCAGCTATAATTCTTGAATGCTCA	CCACAAAGGGCCGAGTTAAG	AGAGAATCCTCTCGCCATCC	CCACAAAGGGCCGAGTTAAGAGAATATACAGCATTGGTGCACCCTGCCAGCTATAATTCTTGAATGCTCAAGAGAATCCTCTCGCCATCC
1035	ACTACCTTTAAGACTGCTGATCGAGAATTGATAGATTGATGAATGGACTT	CCACAAAGGGCCGAGTTAAG	AGAGAATCCTCTCGCCATCC	CCACAAAGGGCCGAGTTAAGACTACCTTTAAGACTGCTGATCGAGAATTGATAGATTGATGAATGGACTTAGAGAATCCTCTCGCCATCC
1036	TTCGTGAGTTGGAACTTAGATATTGGTTGAATCCTAATCAAGTTTACCAA	CCACAAAGGGCCGAGTTAAG	AGAGAATCCTCTCGCCATCC	CCACAAAGGGCCGAGTTAAGTTCGTGAGTTGGAACTTAGATATTGGTTGAATCCTAATCAAGTTTACCAAAGAGAATCCTCTCGCCATCC
1037	CCCACAAACATTTCCCTTATAGTCCAGCCCATAGGTTAATCTGTTAATTC	CCACAAAGGGCCGAGTTAAG	AGAGAATCCTCTCGCCATCC	CCACAAAGGGCCGAGTTAAGCCCACAAACATTTCCCTTATAGTCCAGCCCATAGGTTAATCTGTTAATTCAGAGAATCCTCTCGCCATCC
1038	GAGCTTCAGTTGGGTTGGAGAGATTGGAAGGTAGAGGAAATGAGGGGACC	CCACAAAGGGCCGAGTTAAG	AGAGAATCCTCTCGCCATCC	CCACAAAGGGCCGAGTTAAGGAGCTTCAGTTGGGTTGGAGAGATTGGAAGGTAGAGGAAATGAGGGGACCAGAGAATCCTCTCGCCATCC
1039	ACTAATTTCCTACATTCAAATAGTGTTAAATCTATCCCTTTCACTCCCAC	CCACAAAGGGCCGAGTTAAG	AGAGAATCCTCTCGCCATCC	CCACAAAGGGCCGAGTTAAGACTAATTTCCTACATTCAAATAGTGTTAAATCTATCCCTTTCACTCCCACAGAGAATCCTCTCGCCATCC
1040	CCTTATAATCAACTCATCAATACCTTTCAATTAATGCTTTATAATTATAT	CCACAAAGGGCCGAGTTAAG	AGAGAATCCTCTCGCCATCC	CCACAAAGGGCCGAGTTAAGCCTTATAATCAACTCATCAATACCTTTCAATTAATGCTTTATAATTATATAGAGAATCCTCTCGCCATCC
1041	AAGCTTTAGAGAAGAATGATGCAGGAGACCATTTTCCAGTGTTCGCCATC	CCACAAAGGGCCGAGTTAAG	AGAGAATCCTCTCGCCATCC	CCACAAAGGGCCGAGTTAAGAAGCTTTAGAGAAGAATGATGCAGGAGACCATTTTCCAGTGTTCGCCATCAGAGAATCCTCTCGCCATCC
1042	CCAATAGTAACCATATTAGAAATAAAGAGATAGTCAAAGGTCCTAAATTT	CCACAAAGGGCCGAGTTAAG	AGAGAATCCTCTCGCCATCC	CCACAAAGGGCCGAGTTAAGCCAATAGTAACCATATTAGAAATAAAGAGATAGTCAAAGGTCCTAAATTTAGAGAATCCTCTCGCCATCC
1043	TGACACACCATACTATCCAAAGAAAGAAAGTAATATTTCAGCTAAATTTT	CCACAAAGGGCCGAGTTAAG	AGAGAATCCTCTCGCCATCC	CCACAAAGGGCCGAGTTAAGTGACACACCATACTATCCAAAGAAAGAAAGTAATATTTCAGCTAAATTTTAGAGAATCCTCTCGCCATCC
1044	TATATGGTGGGTGGATCAAAATTTGTGTTTAGAAAGGTAATTGATAAAAT	CCACAAAGGGCCGAGTTAAG	AGAGAATCCTCTCGCCATCC	CCACAAAGGGCCGAGTTAAGTATATGGTGGGTGGATCAAAATTTGTGTTTAGAAAGGTAATTGATAAAATAGAGAATCCTCTCGCCATCC
1045	AATAACAAAGTATTACTACATCATCTGTGTGTGTGAAAGAAGTCCCCTGA	CCACAAAGGGCCGAGTTAAG	AGAGAATCCTCTCGCCATCC	CCACAAAGGGCCGAGTTAAGAATAACAAAGTATTACTACATCATCTGTGTGTGTGAAAGAAGTCCCCTGAAGAGAATCCTCTCGCCATCC
1046	TTACTTGTAGACTTAAAACAATTAGCTTATATTAAATCTCTACTAAAATT	CCACAAAGGGCCGAGTTAAG	AGAGAATCCTCTCGCCATCC	CCACAAAGGGCCGAGTTAAGTTACTTGTAGACTTAAAACAATTAGCTTATATTAAATCTCTACTAAAATTAGAGAATCCTCTCGCCATCC
1047	GGCAACTTCAACGTCTACGATGTTCCAGCAATTTCTCATTTCTATGGAAA	CCACAAAGGGCCGAGTTAAG	AGAGAATCCTCTCGCCATCC	CCACAAAGGGCCGAGTTAAGGGCAACTTCAACGTCTACGATGTTCCAGCAATTTCTCATTTCTATGGAAAAGAGAATCCTCTCGCCATCC
1048	GTACACATCTTTATAATAGATATCTTGTAGGGGATAAAAGTACTTCAAGA	CCACAAAGGGCCGAGTTAAG	AGAGAATCCTCTCGCCATCC	CCACAAAGGGCCGAGTTAAGGTACACATCTTTATAATAGATATCTTGTAGGGGATAAAAGTACTTCAAGAAGAGAATCCTCTCGCCATCC
1049	TTACGGACTAGGCTTTCAAACATTAAAGTAGGTAATGCATTTGTAAACAA	CCACAAAGGGCCGAGTTAAG	AGAGAATCCTCTCGCCATCC	CCACAAAGGGCCGAGTTAAGTTACGGACTAGGCTTTCAAACATTAAAGTAGGTAATGCATTTGTAAACAAAGAGAATCCTCTCGCCATCC
1050	TATTCCTTGTACACTTCCCTCGATCATTATATAATATCTATGCACCAACA	CCACAAAGGGCCGAGTTAAG	AGAGAATCCTCTCGCCATCC	CCACAAAGGGCCGAGTTAAGTATTCCTTGTACACTTCCCTCGATCATTATATAATATCTATGCACCAACAAGAGAATCCTCTCGCCATCC
1051	GGAGTTTTATAAATTTCACTGTTATTTGTATGTCTATTTAAACTTATGGC	CCACAAAGGGCCGAGTTAAG	AGAGAATCCTCTCGCCATCC	CCACAAAGGGCCGAGTTAAGGGAGTTTTATAAATTTCACTGTTATTTGTATGTCTATTTAAACTTATGGCAGAGAATCCTCTCGCCATCC
1052	TCAACACTGATGATATCCGATATTGCTTGTCCATATATTGATTTGAAAAC	CCACAAAGGGCCGAGTTAAG	AGAGAATCCTCTCGCCATCC	CCACAAAGGGCCGAGTTAAGTCAACACTGATGATATCCGATATTGCTTGTCCATATATTGATTTGAAAACAGAGAATCCTCTCGCCATCC
1053	CTAAGTAGCTTGAAATTTGAGGTTCCTAGGATTAGTAACTTACACATTAT	CCACAAAGGGCCGAGTTAAG	AGAGAATCCTCTCGCCATCC	CCACAAAGGGCCGAGTTAAGCTAAGTAGCTTGAAATTTGAGGTTCCTAGGATTAGTAACTTACACATTATAGAGAATCCTCTCGCCATCC
1054	ACAAACCACCAATCGCTTACAGTATGAGAAGTATGTGAATTAGCCATAAA	CCACAAAGGGCCGAGTTAAG	AGAGAATCCTCTCGCCATCC	CCACAAAGGGCCGAGTTAAGACAAACCACCAATCGCTTACAGTATGAGAAGTATGTGAATTAGCCATAAAAGAGAATCCTCTCGCCATCC
1055	CGACATTAATAGGGAGTTGGCAATTCCTTTCACTCTAGAGCAAAATGGTG	CCACAAAGGGCCGAGTTAAG	AGAGAATCCTCTCGCCATCC	CCACAAAGGGCCGAGTTAAGCGACATTAATAGGGAGTTGGCAATTCCTTTCACTCTAGAGCAAAATGGTGAGAGAATCCTCTCGCCATCC
1056	AAAATTTCATATTCTATAGTTCCAACAATTTATCTTAGAATCTTCTTTGT	CCACAAAGGGCCGAGTTAAG	AGAGAATCCTCTCGCCATCC	CCACAAAGGGCCGAGTTAAGAAAATTTCATATTCTATAGTTCCAACAATTTATCTTAGAATCTTCTTTGTAGAGAATCCTCTCGCCATCC
1057	AAGAGTATAAAACTATATTTATTTATATGCTCCAAATCCTATAATATTTG	CCACAAAGGGCCGAGTTAAG	AGAGAATCCTCTCGCCATCC	CCACAAAGGGCCGAGTTAAGAAGAGTATAAAACTATATTTATTTATATGCTCCAAATCCTATAATATTTGAGAGAATCCTCTCGCCATCC
1058	CCCATAGGAAGAAATGATGACGGTCAAGATAACTCAAAGAAAACTGTTCC	CCACAAAGGGCCGAGTTAAG	AGAGAATCCTCTCGCCATCC	CCACAAAGGGCCGAGTTAAGCCCATAGGAAGAAATGATGACGGTCAAGATAACTCAAAGAAAACTGTTCCAGAGAATCCTCTCGCCATCC
1059	ATCATAGATGAGTCGTCATAAATTCAAATTCCAGCTTTCTATGATCTGCT	CCACAAAGGGCCGAGTTAAG	AGAGAATCCTCTCGCCATCC	CCACAAAGGGCCGAGTTAAGATCATAGATGAGTCGTCATAAATTCAAATTCCAGCTTTCTATGATCTGCTAGAGAATCCTCTCGCCATCC
1060	GTTCTAAAGCCCTAATAGGTTCGAAATTATTACTACTGTTAGAACTACTA	CCACAAAGGGCCGAGTTAAG	AGAGAATCCTCTCGCCATCC	CCACAAAGGGCCGAGTTAAGGTTCTAAAGCCCTAATAGGTTCGAAATTATTACTACTGTTAGAACTACTAAGAGAATCCTCTCGCCATCC
1061	ATTTGTTGTGTTGGTATTGGGACTAATGAAATGTTTAAAACTTTAAGACA	CCACAAAGGGCCGAGTTAAG	AGAGAATCCTCTCGCCATCC	CCACAAAGGGCCGAGTTAAGATTTGTTGTGTTGGTATTGGGACTAATGAAATGTTTAAAACTTTAAGACAAGAGAATCCTCTCGCCATCC
1062	TAGAAATCATATACCTTCTCCAGTACCTCCGATTCCCCAAATACCAGTAG	CCACAAAGGGCCGAGTTAAG	AGAGAATCCTCTCGCCATCC	CCACAAAGGGCCGAGTTAAGTAGAAATCATATACCTTCTCCAGTACCTCCGATTCCCCAAATACCAGTAGAGAGAATCCTCTCGCCATCC
1063	AATGTTGTTTAATTTACAAAGAATCATTAAATCAGTACAAAACAGATATT	CCACAAAGGGCCGAGTTAAG	AGAGAATCCTCTCGCCATCC	CCACAAAGGGCCGAGTTAAGAATGTTGTTTAATTTACAAAGAATCATTAAATCAGTACAAAACAGATATTAGAGAATCCTCTCGCCATCC
1064	TATTAATCTTGAGTTTGAGACGGTTCCGCAATCCCTACAGTTACCAGATG	CCACAAAGGGCCGAGTTAAG	AGAGAATCCTCTCGCCATCC	CCACAAAGGGCCGAGTTAAGTATTAATCTTGAGTTTGAGACGGTTCCGCAATCCCTACAGTTACCAGATGAGAGAATCCTCTCGCCATCC
1065	TTGTTATGTCTGGGCATGATTAATTTCTCTAATACCAATAATATACAGGG	CCACAAAGGGCCGAGTTAAG	AGAGAATCCTCTCGCCATCC	CCACAAAGGGCCGAGTTAAGTTGTTATGTCTGGGCATGATTAATTTCTCTAATACCAATAATATACAGGGAGAGAATCCTCTCGCCATCC
1066	GAAACAAAAGCATTGGTCATACAATAATTACACCTGGAGTCCGTTACGAA	CCACAAAGGGCCGAGTTAAG	AGAGAATCCTCTCGCCATCC	CCACAAAGGGCCGAGTTAAGGAAACAAAAGCATTGGTCATACAATAATTACACCTGGAGTCCGTTACGAAAGAGAATCCTCTCGCCATCC
1067	AGTACAACTAGAAGGTTTTGAACAAGAAGACAAATAAGAAAAGACAAGTT	CCACAAAGGGCCGAGTTAAG	AGAGAATCCTCTCGCCATCC	CCACAAAGGGCCGAGTTAAGAGTACAACTAGAAGGTTTTGAACAAGAAGACAAATAAGAAAAGACAAGTTAGAGAATCCTCTCGCCATCC
1068	TTAGAAAATTATTTAAGTATAGAAAATTATGATAGTGCTTGTTTAGTTCA	CCACAAAGGGCCGAGTTAAG	AGAGAATCCTCTCGCCATCC	CCACAAAGGGCCGAGTTAAGTTAGAAAATTATTTAAGTATAGAAAATTATGATAGTGCTTGTTTAGTTCAAGAGAATCCTCTCGCCATCC
1069	TTTATATTTTATATACCCCTTGTAATTTATTGGTATCAGAGTAATTATTG	CCACAAAGGGCCGAGTTAAG	AGAGAATCCTCTCGCCATCC	CCACAAAGGGCCGAGTTAAGTTTATATTTTATATACCCCTTGTAATTTATTGGTATCAGAGTAATTATTGAGAGAATCCTCTCGCCATCC
1070	CAATCGATCGGTATTATTCGTCGACGCTTGCAGAATCTCTCTCTATGCGA	CCACAAAGGGCCGAGTTAAG	AGAGAATCCTCTCGCCATCC	CCACAAAGGGCCGAGTTAAGCAATCGATCGGTATTATTCGTCGACGCTTGCAGAATCTCTCTCTATGCGAAGAGAATCCTCTCGCCATCC
1071	ATTCAGTTTGAGTCATAATTAATGGTGGAAGAAGAACAACAACTAAGGTA	CCACAAAGGGCCGAGTTAAG	AGAGAATCCTCTCGCCATCC	CCACAAAGGGCCGAGTTAAGATTCAGTTTGAGTCATAATTAATGGTGGAAGAAGAACAACAACTAAGGTAAGAGAATCCTCTCGCCATCC
1072	AAAGATAAGAAAACATGTCGAGATGATTATTGTCAAGATGGCTAAAAGAA	CCACAAAGGGCCGAGTTAAG	AGAGAATCCTCTCGCCATCC	CCACAAAGGGCCGAGTTAAGAAAGATAAGAAAACATGTCGAGATGATTATTGTCAAGATGGCTAAAAGAAAGAGAATCCTCTCGCCATCC
1073	AATCAGGGATTATTCCAACTCCATCAGTATTATTAGATTGTTCCCCACCG	CCACAAAGGGCCGAGTTAAG	AGAGAATCCTCTCGCCATCC	CCACAAAGGGCCGAGTTAAGAATCAGGGATTATTCCAACTCCATCAGTATTATTAGATTGTTCCCCACCGAGAGAATCCTCTCGCCATCC
1074	AGGTACTACATTATCAAGAGCTAACAAATTTTCACTAATATTTTATCTAC	CCACAAAGGGCCGAGTTAAG	AGAGAATCCTCTCGCCATCC	CCACAAAGGGCCGAGTTAAGAGGTACTACATTATCAAGAGCTAACAAATTTTCACTAATATTTTATCTACAGAGAATCCTCTCGCCATCC
1075	TCTATATAACACAAATCATCACTTACACATACAATTAACACTGCTTCTTT	CCACAAAGGGCCGAGTTAAG	AGAGAATCCTCTCGCCATCC	CCACAAAGGGCCGAGTTAAGTCTATATAACACAAATCATCACTTACACATACAATTAACACTGCTTCTTTAGAGAATCCTCTCGCCATCC
1076	ATGTTTTGAGATTTCTGTTGCCCGCTAAAACCCATTTATGACTCGTAATT	CCACAAAGGGCCGAGTTAAG	AGAGAATCCTCTCGCCATCC	CCACAAAGGGCCGAGTTAAGATGTTTTGAGATTTCTGTTGCCCGCTAAAACCCATTTATGACTCGTAATTAGAGAATCCTCTCGCCATCC
1077	CTACGACACCCTGAAACTAAAGGAATTGACAACATTTTCTACCATTACCA	CCACAAAGGGCCGAGTTAAG	AGAGAATCCTCTCGCCATCC	CCACAAAGGGCCGAGTTAAGCTACGACACCCTGAAACTAAAGGAATTGACAACATTTTCTACCATTACCAAGAGAATCCTCTCGCCATCC
1078	ACTTTCTTCCTTTCTTTGCAAATCTGATACACTTGAAACTTCATACAACC	CCACAAAGGGCCGAGTTAAG	AGAGAATCCTCTCGCCATCC	CCACAAAGGGCCGAGTTAAGACTTTCTTCCTTTCTTTGCAAATCTGATACACTTGAAACTTCATACAACCAGAGAATCCTCTCGCCATCC
1079	TTTGTTTCAATTTATCATGTTATCGGAGGTTTAAATATGTTATTTGTTGA	CCACAAAGGGCCGAGTTAAG	AGAGAATCCTCTCGCCATCC	CCACAAAGGGCCGAGTTAAGTTTGTTTCAATTTATCATGTTATCGGAGGTTTAAATATGTTATTTGTTGAAGAGAATCCTCTCGCCATCC
1080	CATAATTATTTTAAATTTAGGGTGAGAACTTACATCTTACAAATAATCTA	CCACAAAGGGCCGAGTTAAG	AGAGAATCCTCTCGCCATCC	CCACAAAGGGCCGAGTTAAGCATAATTATTTTAAATTTAGGGTGAGAACTTACATCTTACAAATAATCTAAGAGAATCCTCTCGCCATCC
1081	TTTGGGACTACAAATTTCGAACAAGAACCCTCGTAATAATCTATAATTAT	CCACAAAGGGCCGAGTTAAG	AGAGAATCCTCTCGCCATCC	CCACAAAGGGCCGAGTTAAGTTTGGGACTACAAATTTCGAACAAGAACCCTCGTAATAATCTATAATTATAGAGAATCCTCTCGCCATCC
1082	TCTGTGACTGTAAAATGCACGGTACGAATTTCGAGGTGGTTCAGATTCTG	CCACAAAGGGCCGAGTTAAG	AGAGAATCCTCTCGCCATCC	CCACAAAGGGCCGAGTTAAGTCTGTGACTGTAAAATGCACGGTACGAATTTCGAGGTGGTTCAGATTCTGAGAGAATCCTCTCGCCATCC
1083	TCTCTAAAGGAACATAATTGAGCCTTAACACACAAACCACATAAATGGCA	CCACAAAGGGCCGAGTTAAG	AGAGAATCCTCTCGCCATCC	CCACAAAGGGCCGAGTTAAGTCTCTAAAGGAACATAATTGAGCCTTAACACACAAACCACATAAATGGCAAGAGAATCCTCTCGCCATCC
1084	TTTTAGAATATATATAAATACGATGCACTCACTCTTTAAACATTTGCTTT	CCACAAAGGGCCGAGTTAAG	AGAGAATCCTCTCGCCATCC	CCACAAAGGGCCGAGTTAAGTTTTAGAATATATATAAATACGATGCACTCACTCTTTAAACATTTGCTTTAGAGAATCCTCTCGCCATCC
1085	GAGAGGAGAGGGAGAAAGAGAAGCAACGGAGGCGAAGGAAGGAGAAGGAG	CCACAAAGGGCCGAGTTAAG	AGAGAATCCTCTCGCCATCC	CCACAAAGGGCCGAGTTAAGGAGAGGAGAGGGAGAAAGAGAAGCAACGGAGGCGAAGGAAGGAGAAGGAGAGAGAATCCTCTCGCCATCC
1086	AGAGGAAGATGGCGAAAGAACGAAAGAAAGCTCCAGATGACGAGAATGGA	CCACAAAGGGCCGAGTTAAG	AGAGAATCCTCTCGCCATCC	CCACAAAGGGCCGAGTTAAGAGAGGAAGATGGCGAAAGAACGAAAGAAAGCTCCAGATGACGAGAATGGAAGAGAATCCTCTCGCCATCC
1087	AATATGCATTGATCTAGAATGAAAGGAGAAATTCTTACCAATGTGAATTG	CCACAAAGGGCCGAGTTAAG	AGAGAATCCTCTCGCCATCC	CCACAAAGGGCCGAGTTAAGAATATGCATTGATCTAGAATGAAAGGAGAAATTCTTACCAATGTGAATTGAGAGAATCCTCTCGCCATCC
1088	ATAAATGATCTCCTTGCCTCAAACCCCGAGTATGAGTAAACTGTACTGAG	CCACAAAGGGCCGAGTTAAG	AGAGAATCCTCTCGCCATCC	CCACAAAGGGCCGAGTTAAGATAAATGATCTCCTTGCCTCAAACCCCGAGTATGAGTAAACTGTACTGAGAGAGAATCCTCTCGCCATCC
1089	GATTTTAATGAATTATTATAGAGCTGGTAGAATGGAGTGGCAGATGAAAA	CCACAAAGGGCCGAGTTAAG	AGAGAATCCTCTCGCCATCC	CCACAAAGGGCCGAGTTAAGGATTTTAATGAATTATTATAGAGCTGGTAGAATGGAGTGGCAGATGAAAAAGAGAATCCTCTCGCCATCC
1090	TAAACATTTTAAAGCTTACTGTAATGTTATTCCAACCCATTAATTATCCC	CCACAAAGGGCCGAGTTAAG	AGAGAATCCTCTCGCCATCC	CCACAAAGGGCCGAGTTAAGTAAACATTTTAAAGCTTACTGTAATGTTATTCCAACCCATTAATTATCCCAGAGAATCCTCTCGCCATCC
1091	TCATCCTGATTGTATATTCTCTTAGTTTATTTATACAGATCCCGGTTTTA	CCACAAAGGGCCGAGTTAAG	AGAGAATCCTCTCGCCATCC	CCACAAAGGGCCGAGTTAAGTCATCCTGATTGTATATTCTCTTAGTTTATTTATACAGATCCCGGTTTTAAGAGAATCCTCTCGCCATCC
1092	TGGGCAGCAAGAAATTCCAAGTCTGTCTAGGTCTCGAACAATCCCGCAAA	CCACAAAGGGCCGAGTTAAG	AGAGAATCCTCTCGCCATCC	CCACAAAGGGCCGAGTTAAGTGGGCAGCAAGAAATTCCAAGTCTGTCTAGGTCTCGAACAATCCCGCAAAAGAGAATCCTCTCGCCATCC
1093	CATCCTCCACAACAGCCCCACACAAAGAGCACTGCGTTGAGTCAATGACA	CCACAAAGGGCCGAGTTAAG	AGAGAATCCTCTCGCCATCC	CCACAAAGGGCCGAGTTAAGCATCCTCCACAACAGCCCCACACAAAGAGCACTGCGTTGAGTCAATGACAAGAGAATCCTCTCGCCATCC
1094	AACAGCTGCTTGTGTACCAATATTCGGAGATAGCCAAGTTTAGATTTAGC	CCACAAAGGGCCGAGTTAAG	AGAGAATCCTCTCGCCATCC	CCACAAAGGGCCGAGTTAAGAACAGCTGCTTGTGTACCAATATTCGGAGATAGCCAAGTTTAGATTTAGCAGAGAATCCTCTCGCCATCC
1095	CAGGCTCGGGTCATTGAGGACATCTTGGCTGATTTATGTGCACAATCTGG	CCACAAAGGGCCGAGTTAAG	AGAGAATCCTCTCGCCATCC	CCACAAAGGGCCGAGTTAAGCAGGCTCGGGTCATTGAGGACATCTTGGCTGATTTATGTGCACAATCTGGAGAGAATCCTCTCGCCATCC
1096	CCATCTTGCCAAGCTGCCGATAATATTATCATTGTGCAGGAGCTGGTGCA	CCACAAAGGGCCGAGTTAAG	AGAGAATCCTCTCGCCATCC	CCACAAAGGGCCGAGTTAAGCCATCTTGCCAAGCTGCCGATAATATTATCATTGTGCAGGAGCTGGTGCAAGAGAATCCTCTCGCCATCC
1097	CCATCCATCTGAAATAAGGCCCCTTTAATCTCCATTTCCGTGACTCCCCT	CCACAAAGGGCCGAGTTAAG	AGAGAATCCTCTCGCCATCC	CCACAAAGGGCCGAGTTAAGCCATCCATCTGAAATAAGGCCCCTTTAATCTCCATTTCCGTGACTCCCCTAGAGAATCCTCTCGCCATCC
1098	GTTGTTTTAAAGGAGAAAATAGCACAAATCAATCATCTAAAAGAGTAGCC	CCACAAAGGGCCGAGTTAAG	AGAGAATCCTCTCGCCATCC	CCACAAAGGGCCGAGTTAAGGTTGTTTTAAAGGAGAAAATAGCACAAATCAATCATCTAAAAGAGTAGCCAGAGAATCCTCTCGCCATCC
1099	GAGGACTATAAATATGTGCTGGAGAATGGACCGTGGATAGTGCTAGGTCA	CCACAAAGGGCCGAGTTAAG	AGAGAATCCTCTCGCCATCC	CCACAAAGGGCCGAGTTAAGGAGGACTATAAATATGTGCTGGAGAATGGACCGTGGATAGTGCTAGGTCAAGAGAATCCTCTCGCCATCC
1100	TTCAGCGGCAACCAAATTACTTAAATGATAAGCATAAATAATAAACTTTG	CCACAAAGGGCCGAGTTAAG	AGAGAATCCTCTCGCCATCC	CCACAAAGGGCCGAGTTAAGTTCAGCGGCAACCAAATTACTTAAATGATAAGCATAAATAATAAACTTTGAGAGAATCCTCTCGCCATCC
1101	TCCTGAATTAGAGGGTCACTTGTGTTTCATATTCTCCTTGCTTCGTTGTT	CCACAAAGGGCCGAGTTAAG	AGAGAATCCTCTCGCCATCC	CCACAAAGGGCCGAGTTAAGTCCTGAATTAGAGGGTCACTTGTGTTTCATATTCTCCTTGCTTCGTTGTTAGAGAATCCTCTCGCCATCC
1102	AAAGAAACAACACTACCCTAACATATAGCCAGGTAATATCCCTCTGATAG	CCACAAAGGGCCGAGTTAAG	AGAGAATCCTCTCGCCATCC	CCACAAAGGGCCGAGTTAAGAAAGAAACAACACTACCCTAACATATAGCCAGGTAATATCCCTCTGATAGAGAGAATCCTCTCGCCATCC
1103	TTTTCTTTGCAGCATATAGTAGCACAACTGTTAAGGATCATAAATAGATC	CCACAAAGGGCCGAGTTAAG	AGAGAATCCTCTCGCCATCC	CCACAAAGGGCCGAGTTAAGTTTTCTTTGCAGCATATAGTAGCACAACTGTTAAGGATCATAAATAGATCAGAGAATCCTCTCGCCATCC
1104	AGGGACTGGTTTGAAATAGAGACTAGTTCCTGGTGTGAAACATAAGAAAG	CCACAAAGGGCCGAGTTAAG	AGAGAATCCTCTCGCCATCC	CCACAAAGGGCCGAGTTAAGAGGGACTGGTTTGAAATAGAGACTAGTTCCTGGTGTGAAACATAAGAAAGAGAGAATCCTCTCGCCATCC
1105	ATCAATTATTTTCATTATGAGCCAAATATTTCTAGTTAAATAATTATGAG	CCACAAAGGGCCGAGTTAAG	AGAGAATCCTCTCGCCATCC	CCACAAAGGGCCGAGTTAAGATCAATTATTTTCATTATGAGCCAAATATTTCTAGTTAAATAATTATGAGAGAGAATCCTCTCGCCATCC
1106	GCTTCAGATAATATGGATGGGTGTTTCGACTGCAACATTTGTCTAGAAGC	CCACAAAGGGCCGAGTTAAG	AGAGAATCCTCTCGCCATCC	CCACAAAGGGCCGAGTTAAGGCTTCAGATAATATGGATGGGTGTTTCGACTGCAACATTTGTCTAGAAGCAGAGAATCCTCTCGCCATCC
1107	GTTAGTTGGAATCAATGATCAGTGTACAACTTATTTCAGATAATGTTATC	CCACAAAGGGCCGAGTTAAG	AGAGAATCCTCTCGCCATCC	CCACAAAGGGCCGAGTTAAGGTTAGTTGGAATCAATGATCAGTGTACAACTTATTTCAGATAATGTTATCAGAGAATCCTCTCGCCATCC
1108	CACCAGGATCTCAGTTATCTCACAGTAACTCCTTTAAAACACACACAAAA	CCACAAAGGGCCGAGTTAAG	AGAGAATCCTCTCGCCATCC	CCACAAAGGGCCGAGTTAAGCACCAGGATCTCAGTTATCTCACAGTAACTCCTTTAAAACACACACAAAAAGAGAATCCTCTCGCCATCC
1109	ATAAATACCAATACATCATCTACAAGTAAGAATCTTTATCTTAATTTATT	CCACAAAGGGCCGAGTTAAG	AGAGAATCCTCTCGCCATCC	CCACAAAGGGCCGAGTTAAGATAAATACCAATACATCATCTACAAGTAAGAATCTTTATCTTAATTTATTAGAGAATCCTCTCGCCATCC
1110	GTATTTACAATTAATCCTTAATAAGATGGTCTGCCCCACTTATATTTTGA	CCACAAAGGGCCGAGTTAAG	AGAGAATCCTCTCGCCATCC	CCACAAAGGGCCGAGTTAAGGTATTTACAATTAATCCTTAATAAGATGGTCTGCCCCACTTATATTTTGAAGAGAATCCTCTCGCCATCC
1111	GGATCCGACTTGTTCCGTGTAAGAGTTTCGACATGTAATATATATAAAAT	CCACAAAGGGCCGAGTTAAG	AGAGAATCCTCTCGCCATCC	CCACAAAGGGCCGAGTTAAGGGATCCGACTTGTTCCGTGTAAGAGTTTCGACATGTAATATATATAAAATAGAGAATCCTCTCGCCATCC
1112	GACAGCATAGAAGGTACATTTGACCATCAACCACTATTTAGAAATTTATA	CCACAAAGGGCCGAGTTAAG	AGAGAATCCTCTCGCCATCC	CCACAAAGGGCCGAGTTAAGGACAGCATAGAAGGTACATTTGACCATCAACCACTATTTAGAAATTTATAAGAGAATCCTCTCGCCATCC
1113	TTCATTCCGGAATATATTCTTCTCTAATATCTATAACAAACCAAACAATT	CCACAAAGGGCCGAGTTAAG	AGAGAATCCTCTCGCCATCC	CCACAAAGGGCCGAGTTAAGTTCATTCCGGAATATATTCTTCTCTAATATCTATAACAAACCAAACAATTAGAGAATCCTCTCGCCATCC
1114	CTAGTGATGTGGTATTATTATGTCCATGAGCTCTAGTAATGTGGTATTAT	CCACAAAGGGCCGAGTTAAG	AGAGAATCCTCTCGCCATCC	CCACAAAGGGCCGAGTTAAGCTAGTGATGTGGTATTATTATGTCCATGAGCTCTAGTAATGTGGTATTATAGAGAATCCTCTCGCCATCC
1115	AATCATGAAAATGTTTAAAGAATGTCGTAATTAAGGTAGATGGTGCGTTT	CCACAAAGGGCCGAGTTAAG	AGAGAATCCTCTCGCCATCC	CCACAAAGGGCCGAGTTAAGAATCATGAAAATGTTTAAAGAATGTCGTAATTAAGGTAGATGGTGCGTTTAGAGAATCCTCTCGCCATCC
1116	ATAAATAAAATTCTAATTCACCTTACGATATTTCTCCCGTCTATTTTCCT	CCACAAAGGGCCGAGTTAAG	AGAGAATCCTCTCGCCATCC	CCACAAAGGGCCGAGTTAAGATAAATAAAATTCTAATTCACCTTACGATATTTCTCCCGTCTATTTTCCTAGAGAATCCTCTCGCCATCC
1117	ATATATTGTATTGATTTTAATAGGTGTATTATATTTGCATATATCACATG	CCACAAAGGGCCGAGTTAAG	AGAGAATCCTCTCGCCATCC	CCACAAAGGGCCGAGTTAAGATATATTGTATTGATTTTAATAGGTGTATTATATTTGCATATATCACATGAGAGAATCCTCTCGCCATCC
1118	TGCGAGACGAACGATCCAAAACTCTTGCCCACCACACAGTGCCATGCCGG	CCACAAAGGGCCGAGTTAAG	AGAGAATCCTCTCGCCATCC	CCACAAAGGGCCGAGTTAAGTGCGAGACGAACGATCCAAAACTCTTGCCCACCACACAGTGCCATGCCGGAGAGAATCCTCTCGCCATCC
1119	ATCTCCTTGAATATTAACAACAACATCATACTCCTTTTCCAACTTTTCAA	CCACAAAGGGCCGAGTTAAG	AGAGAATCCTCTCGCCATCC	CCACAAAGGGCCGAGTTAAGATCTCCTTGAATATTAACAACAACATCATACTCCTTTTCCAACTTTTCAAAGAGAATCCTCTCGCCATCC
1120	TATATATCATTATATACTCCAAACAAGTAAGCAATTAGGTATACAAATTT	CCACAAAGGGCCGAGTTAAG	AGAGAATCCTCTCGCCATCC	CCACAAAGGGCCGAGTTAAGTATATATCATTATATACTCCAAACAAGTAAGCAATTAGGTATACAAATTTAGAGAATCCTCTCGCCATCC
1121	GTTTGACGAATCGGTCTCTATTGCCTCAATAAAACTAAAGTCAAAATTCG	CCACAAAGGGCCGAGTTAAG	AGAGAATCCTCTCGCCATCC	CCACAAAGGGCCGAGTTAAGGTTTGACGAATCGGTCTCTATTGCCTCAATAAAACTAAAGTCAAAATTCGAGAGAATCCTCTCGCCATCC
1122	TTTTCTATAAAAGACCTTGTAAATTGATGATTAAAATTTGTCTTTGAGCC	CCACAAAGGGCCGAGTTAAG	AGAGAATCCTCTCGCCATCC	CCACAAAGGGCCGAGTTAAGTTTTCTATAAAAGACCTTGTAAATTGATGATTAAAATTTGTCTTTGAGCCAGAGAATCCTCTCGCCATCC
1123	GATGATATTCACAATTAGGGCTTTGAAATGACTATTAAAACCAATAAATT	CCACAAAGGGCCGAGTTAAG	AGAGAATCCTCTCGCCATCC	CCACAAAGGGCCGAGTTAAGGATGATATTCACAATTAGGGCTTTGAAATGACTATTAAAACCAATAAATTAGAGAATCCTCTCGCCATCC
1124	TTTACATGGTCAAACTTGAGGAACATGCTGGTAAATATTCAAGAAAGGCT	CCACAAAGGGCCGAGTTAAG	AGAGAATCCTCTCGCCATCC	CCACAAAGGGCCGAGTTAAGTTTACATGGTCAAACTTGAGGAACATGCTGGTAAATATTCAAGAAAGGCTAGAGAATCCTCTCGCCATCC
1125	GCAATGGAGGTTGAGTAGTCTTCATCCCATCTGTAAGCATGTCTTGTCCA	CCACAAAGGGCCGAGTTAAG	AGAGAATCCTCTCGCCATCC	CCACAAAGGGCCGAGTTAAGGCAATGGAGGTTGAGTAGTCTTCATCCCATCTGTAAGCATGTCTTGTCCAAGAGAATCCTCTCGCCATCC
1126	TCATTGCCATAATCACACCAGAAAATGCAGGAAAGATGATGCCACATAAT	CCACAAAGGGCCGAGTTAAG	AGAGAATCCTCTCGCCATCC	CCACAAAGGGCCGAGTTAAGTCATTGCCATAATCACACCAGAAAATGCAGGAAAGATGATGCCACATAATAGAGAATCCTCTCGCCATCC
1127	CATGCTTATTTGTTAACTTCATATGCATAATTTCTTTTGTTTAACGTTAC	CCACAAAGGGCCGAGTTAAG	AGAGAATCCTCTCGCCATCC	CCACAAAGGGCCGAGTTAAGCATGCTTATTTGTTAACTTCATATGCATAATTTCTTTTGTTTAACGTTACAGAGAATCCTCTCGCCATCC
1128	GAAAACAAAATCTCTTAGCCATGATCTAACTAAACCACAAGATATAGTAT	CCACAAAGGGCCGAGTTAAG	AGAGAATCCTCTCGCCATCC	CCACAAAGGGCCGAGTTAAGGAAAACAAAATCTCTTAGCCATGATCTAACTAAACCACAAGATATAGTATAGAGAATCCTCTCGCCATCC
1129	CAATATCATAACGAATTACAAGAATATATAAACTATCACAATTGAATAGT	CCACAAAGGGCCGAGTTAAG	AGAGAATCCTCTCGCCATCC	CCACAAAGGGCCGAGTTAAGCAATATCATAACGAATTACAAGAATATATAAACTATCACAATTGAATAGTAGAGAATCCTCTCGCCATCC
1130	TGATTGTTTGTAGTGGTCATTCATTCAAAGTATTCTAAGTTATTTTCATT	CCACAAAGGGCCGAGTTAAG	AGAGAATCCTCTCGCCATCC	CCACAAAGGGCCGAGTTAAGTGATTGTTTGTAGTGGTCATTCATTCAAAGTATTCTAAGTTATTTTCATTAGAGAATCCTCTCGCCATCC
1131	CGATACTTTAATGGATATACACATATTTAAATGTTTATAGTTAATTAAGT	CCACAAAGGGCCGAGTTAAG	AGAGAATCCTCTCGCCATCC	CCACAAAGGGCCGAGTTAAGCGATACTTTAATGGATATACACATATTTAAATGTTTATAGTTAATTAAGTAGAGAATCCTCTCGCCATCC
1132	TTTAATGAATATTTTATTATCTCTCTTTTACAAGTTATCCTACATATTTA	CCACAAAGGGCCGAGTTAAG	AGAGAATCCTCTCGCCATCC	CCACAAAGGGCCGAGTTAAGTTTAATGAATATTTTATTATCTCTCTTTTACAAGTTATCCTACATATTTAAGAGAATCCTCTCGCCATCC
1133	AGAGAGTTTATATGTTATCCAAGCGGTTAAAATGTTTTATTTATTTCATG	CCACAAAGGGCCGAGTTAAG	AGAGAATCCTCTCGCCATCC	CCACAAAGGGCCGAGTTAAGAGAGAGTTTATATGTTATCCAAGCGGTTAAAATGTTTTATTTATTTCATGAGAGAATCCTCTCGCCATCC
1134	GTTTGTATACCATTCTGCTTACTAGTTTATTTTAAATTTACTCTTTCTAA	CCACAAAGGGCCGAGTTAAG	AGAGAATCCTCTCGCCATCC	CCACAAAGGGCCGAGTTAAGGTTTGTATACCATTCTGCTTACTAGTTTATTTTAAATTTACTCTTTCTAAAGAGAATCCTCTCGCCATCC
1135	TTTGTAATCAAAAGGAGTCAAACTTGCGTCTTCACACGTAATAGTCTCGC	CCACAAAGGGCCGAGTTAAG	AGAGAATCCTCTCGCCATCC	CCACAAAGGGCCGAGTTAAGTTTGTAATCAAAAGGAGTCAAACTTGCGTCTTCACACGTAATAGTCTCGCAGAGAATCCTCTCGCCATCC
1136	TCACAGCAGGAAGAAGAATCTCCACAACTAATATATTTCACAGCTACAAC	CCACAAAGGGCCGAGTTAAG	AGAGAATCCTCTCGCCATCC	CCACAAAGGGCCGAGTTAAGTCACAGCAGGAAGAAGAATCTCCACAACTAATATATTTCACAGCTACAACAGAGAATCCTCTCGCCATCC
1137	CAAGACACCCTCCTCCATCCTTTGAGACCAGTGTGAAATTATATCCTCTA	CCACAAAGGGCCGAGTTAAG	AGAGAATCCTCTCGCCATCC	CCACAAAGGGCCGAGTTAAGCAAGACACCCTCCTCCATCCTTTGAGACCAGTGTGAAATTATATCCTCTAAGAGAATCCTCTCGCCATCC
1138	AGATTCTTCATTTGTATTTTGATTGTTCAGTGATGTAATTAAGCTCAAAG	CCACAAAGGGCCGAGTTAAG	AGAGAATCCTCTCGCCATCC	CCACAAAGGGCCGAGTTAAGAGATTCTTCATTTGTATTTTGATTGTTCAGTGATGTAATTAAGCTCAAAGAGAGAATCCTCTCGCCATCC
1139	CTTTGGACTTTTATGAATTATGGCCTGGCTGTTTCTCTTTTCTTTGTCTT	CCACAAAGGGCCGAGTTAAG	AGAGAATCCTCTCGCCATCC	CCACAAAGGGCCGAGTTAAGCTTTGGACTTTTATGAATTATGGCCTGGCTGTTTCTCTTTTCTTTGTCTTAGAGAATCCTCTCGCCATCC
1140	AATTGAGAAAGAGAATATACAGCACAAGAGAACAAGAAATTTGTAGAAAT	CCACAAAGGGCCGAGTTAAG	AGAGAATCCTCTCGCCATCC	CCACAAAGGGCCGAGTTAAGAATTGAGAAAGAGAATATACAGCACAAGAGAACAAGAAATTTGTAGAAATAGAGAATCCTCTCGCCATCC
1141	TGTATGATGTAGGACTGAATGCTGGGGTAACTGGAACTGTAGTAAAGACA	CCACAAAGGGCCGAGTTAAG	AGAGAATCCTCTCGCCATCC	CCACAAAGGGCCGAGTTAAGTGTATGATGTAGGACTGAATGCTGGGGTAACTGGAACTGTAGTAAAGACAAGAGAATCCTCTCGCCATCC
1142	GAGAAAACATTGAAGGAACTTCCTGTATATGCAGTGTTGAACCTCAAAGT	CCACAAAGGGCCGAGTTAAG	AGAGAATCCTCTCGCCATCC	CCACAAAGGGCCGAGTTAAGGAGAAAACATTGAAGGAACTTCCTGTATATGCAGTGTTGAACCTCAAAGTAGAGAATCCTCTCGCCATCC
1143	AACCTTGAAAATTTTCGTTTGTTAGTCATATCTACCGCTAATTAATTTAA	CCACAAAGGGCCGAGTTAAG	AGAGAATCCTCTCGCCATCC	CCACAAAGGGCCGAGTTAAGAACCTTGAAAATTTTCGTTTGTTAGTCATATCTACCGCTAATTAATTTAAAGAGAATCCTCTCGCCATCC
1144	TCTGAAAATCATTAATGAGATAGAAATCAAATAAGGAGGCGGCGATGAGA	CCACAAAGGGCCGAGTTAAG	AGAGAATCCTCTCGCCATCC	CCACAAAGGGCCGAGTTAAGTCTGAAAATCATTAATGAGATAGAAATCAAATAAGGAGGCGGCGATGAGAAGAGAATCCTCTCGCCATCC
1145	TATCTATAATTCTAAAACTACAATGCCTCATGATCCTTTCCCAATTTATC	CCACAAAGGGCCGAGTTAAG	AGAGAATCCTCTCGCCATCC	CCACAAAGGGCCGAGTTAAGTATCTATAATTCTAAAACTACAATGCCTCATGATCCTTTCCCAATTTATCAGAGAATCCTCTCGCCATCC
1146	GTATATTCAGCAAGCTCAGTGTATACAAATAAAATATTTAACTAGACATA	CCACAAAGGGCCGAGTTAAG	AGAGAATCCTCTCGCCATCC	CCACAAAGGGCCGAGTTAAGGTATATTCAGCAAGCTCAGTGTATACAAATAAAATATTTAACTAGACATAAGAGAATCCTCTCGCCATCC
1147	TTTCAGGGACAGCTTGTGACTCCTCTAAATGTGCAAATAAAATCATATGA	CCACAAAGGGCCGAGTTAAG	AGAGAATCCTCTCGCCATCC	CCACAAAGGGCCGAGTTAAGTTTCAGGGACAGCTTGTGACTCCTCTAAATGTGCAAATAAAATCATATGAAGAGAATCCTCTCGCCATCC
1148	TTGTTTATTGTAGGGCTGTATTTGTGAGAGACAGGTTAAAGCTTATATAT	CCACAAAGGGCCGAGTTAAG	AGAGAATCCTCTCGCCATCC	CCACAAAGGGCCGAGTTAAGTTGTTTATTGTAGGGCTGTATTTGTGAGAGACAGGTTAAAGCTTATATATAGAGAATCCTCTCGCCATCC
1149	CTTTGTAATTCAACATTCTTGATAATTAGGTTTTAATCATTTTAATGTTC	CCACAAAGGGCCGAGTTAAG	AGAGAATCCTCTCGCCATCC	CCACAAAGGGCCGAGTTAAGCTTTGTAATTCAACATTCTTGATAATTAGGTTTTAATCATTTTAATGTTCAGAGAATCCTCTCGCCATCC
1150	GATGAGAAGATTTTAAAACTAAATGCCTCAGGAAGAATTTCATTCTTGTG	CCACAAAGGGCCGAGTTAAG	AGAGAATCCTCTCGCCATCC	CCACAAAGGGCCGAGTTAAGGATGAGAAGATTTTAAAACTAAATGCCTCAGGAAGAATTTCATTCTTGTGAGAGAATCCTCTCGCCATCC
1151	CAACAAGTGAGCTTAATTTCTTAAAGATGGTCGGTATCTGTGATTCCTTC	CCACAAAGGGCCGAGTTAAG	AGAGAATCCTCTCGCCATCC	CCACAAAGGGCCGAGTTAAGCAACAAGTGAGCTTAATTTCTTAAAGATGGTCGGTATCTGTGATTCCTTCAGAGAATCCTCTCGCCATCC
1152	AAAAGAAATAAGATCAATTGAGACACCCAAGATATCAGCTGATCCCTCAC	CCACAAAGGGCCGAGTTAAG	AGAGAATCCTCTCGCCATCC	CCACAAAGGGCCGAGTTAAGAAAAGAAATAAGATCAATTGAGACACCCAAGATATCAGCTGATCCCTCACAGAGAATCCTCTCGCCATCC
1153	CAGGTGCCCATCAAGAAGCTCTACACAGTAATTGAAATGGCTGCTCAAGG	CCACAAAGGGCCGAGTTAAG	AGAGAATCCTCTCGCCATCC	CCACAAAGGGCCGAGTTAAGCAGGTGCCCATCAAGAAGCTCTACACAGTAATTGAAATGGCTGCTCAAGGAGAGAATCCTCTCGCCATCC
1154	AAGTCTTGATCTTGATATTGAATTACGTCTTGAAGGCAATCAAAGAAATG	CCACAAAGGGCCGAGTTAAG	AGAGAATCCTCTCGCCATCC	CCACAAAGGGCCGAGTTAAGAAGTCTTGATCTTGATATTGAATTACGTCTTGAAGGCAATCAAAGAAATGAGAGAATCCTCTCGCCATCC
1155	TTGATCTCAACCGGACAAAATTAAATTGCATGGTAGAAGCAGAAAGTTGA	CCACAAAGGGCCGAGTTAAG	AGAGAATCCTCTCGCCATCC	CCACAAAGGGCCGAGTTAAGTTGATCTCAACCGGACAAAATTAAATTGCATGGTAGAAGCAGAAAGTTGAAGAGAATCCTCTCGCCATCC
1156	ATGTCCCGTGAAAATTGCCTATTAGATGTAGAAGTCTGAAGAGCCTCCGC	CCACAAAGGGCCGAGTTAAG	AGAGAATCCTCTCGCCATCC	CCACAAAGGGCCGAGTTAAGATGTCCCGTGAAAATTGCCTATTAGATGTAGAAGTCTGAAGAGCCTCCGCAGAGAATCCTCTCGCCATCC
1157	AACCCATTTATTTCTACCCACCCAAACTCCACCTGAAGCGGTCTTGGTAC	CCACAAAGGGCCGAGTTAAG	AGAGAATCCTCTCGCCATCC	CCACAAAGGGCCGAGTTAAGAACCCATTTATTTCTACCCACCCAAACTCCACCTGAAGCGGTCTTGGTACAGAGAATCCTCTCGCCATCC
1158	CATTGATTATTCTCTTTATTTCTTGGTATTATTATCATATATGGCCCGCC	CCACAAAGGGCCGAGTTAAG	AGAGAATCCTCTCGCCATCC	CCACAAAGGGCCGAGTTAAGCATTGATTATTCTCTTTATTTCTTGGTATTATTATCATATATGGCCCGCCAGAGAATCCTCTCGCCATCC
1159	TATGGGACCAATTATACTGTTTTACCATCTATTATTCTTCCATATCCAAA	CCACAAAGGGCCGAGTTAAG	AGAGAATCCTCTCGCCATCC	CCACAAAGGGCCGAGTTAAGTATGGGACCAATTATACTGTTTTACCATCTATTATTCTTCCATATCCAAAAGAGAATCCTCTCGCCATCC
1160	ATACAAAGCCAGGCACCCTCCCAATATTAAGATTCCTTCAAACTTTTCTT	CCACAAAGGGCCGAGTTAAG	AGAGAATCCTCTCGCCATCC	CCACAAAGGGCCGAGTTAAGATACAAAGCCAGGCACCCTCCCAATATTAAGATTCCTTCAAACTTTTCTTAGAGAATCCTCTCGCCATCC
1161	AATCTTAATAATGAGAGAGTCTAATTCTACATTTGTATTAAAAGTTGTAA	CCACAAAGGGCCGAGTTAAG	AGAGAATCCTCTCGCCATCC	CCACAAAGGGCCGAGTTAAGAATCTTAATAATGAGAGAGTCTAATTCTACATTTGTATTAAAAGTTGTAAAGAGAATCCTCTCGCCATCC
1162	AAACTTTTATTATGCAGAATGTATTTTGAATATTACACACGTACAATAAC	CCACAAAGGGCCGAGTTAAG	AGAGAATCCTCTCGCCATCC	CCACAAAGGGCCGAGTTAAGAAACTTTTATTATGCAGAATGTATTTTGAATATTACACACGTACAATAACAGAGAATCCTCTCGCCATCC
1163	CAATGCATTCATCCCTCAATTTCTTAGTTTCAGGACAAGCACAACAAATC	CCACAAAGGGCCGAGTTAAG	AGAGAATCCTCTCGCCATCC	CCACAAAGGGCCGAGTTAAGCAATGCATTCATCCCTCAATTTCTTAGTTTCAGGACAAGCACAACAAATCAGAGAATCCTCTCGCCATCC
1164	CAACTGTGTTCATCCCATTCCACAACTATAGAATCTGGTAATAATTAGGC	CCACAAAGGGCCGAGTTAAG	AGAGAATCCTCTCGCCATCC	CCACAAAGGGCCGAGTTAAGCAACTGTGTTCATCCCATTCCACAACTATAGAATCTGGTAATAATTAGGCAGAGAATCCTCTCGCCATCC
1165	CTATCTATGGAGAAGAGAAGCAATGATGAGGTGCCTTGTTGTGTAAGATG	CCACAAAGGGCCGAGTTAAG	AGAGAATCCTCTCGCCATCC	CCACAAAGGGCCGAGTTAAGCTATCTATGGAGAAGAGAAGCAATGATGAGGTGCCTTGTTGTGTAAGATGAGAGAATCCTCTCGCCATCC
1166	ATTCTATACACCTTTAGTAGACATGCTATGACAGTGTAAGACTTTAACCT	CCACAAAGGGCCGAGTTAAG	AGAGAATCCTCTCGCCATCC	CCACAAAGGGCCGAGTTAAGATTCTATACACCTTTAGTAGACATGCTATGACAGTGTAAGACTTTAACCTAGAGAATCCTCTCGCCATCC
1167	GTTGAGGGATCACGAGAACTGGGTGGAGATTGGTGGGTTTCTAGGTGGAG	CCACAAAGGGCCGAGTTAAG	AGAGAATCCTCTCGCCATCC	CCACAAAGGGCCGAGTTAAGGTTGAGGGATCACGAGAACTGGGTGGAGATTGGTGGGTTTCTAGGTGGAGAGAGAATCCTCTCGCCATCC
1168	ATGTAGAAATAATGAGTATAAATCTTATAGTTTACTTTCTTTTCTTTTCT	CCACAAAGGGCCGAGTTAAG	AGAGAATCCTCTCGCCATCC	CCACAAAGGGCCGAGTTAAGATGTAGAAATAATGAGTATAAATCTTATAGTTTACTTTCTTTTCTTTTCTAGAGAATCCTCTCGCCATCC
1169	TTTTCCTTTTCGTTAATATCATTTTAAGTCCTCTAAAATATGAGAATTTC	CCACAAAGGGCCGAGTTAAG	AGAGAATCCTCTCGCCATCC	CCACAAAGGGCCGAGTTAAGTTTTCCTTTTCGTTAATATCATTTTAAGTCCTCTAAAATATGAGAATTTCAGAGAATCCTCTCGCCATCC
1170	TGAGCAATAGTAGTACGTTATAAGAAATTATACAATGAGAAAGAGAGAGA	CCACAAAGGGCCGAGTTAAG	AGAGAATCCTCTCGCCATCC	CCACAAAGGGCCGAGTTAAGTGAGCAATAGTAGTACGTTATAAGAAATTATACAATGAGAAAGAGAGAGAAGAGAATCCTCTCGCCATCC
1171	ACAATATCAAGTAGTTGGTTGTGAATAATATCTGGCCTATAGTTGCGGCA	CCACAAAGGGCCGAGTTAAG	AGAGAATCCTCTCGCCATCC	CCACAAAGGGCCGAGTTAAGACAATATCAAGTAGTTGGTTGTGAATAATATCTGGCCTATAGTTGCGGCAAGAGAATCCTCTCGCCATCC
1172	TGTTCAGATAGGAGTGAAGCGCGTCTAAGTATGGAAAGATTCTCTGATCA	CCACAAAGGGCCGAGTTAAG	AGAGAATCCTCTCGCCATCC	CCACAAAGGGCCGAGTTAAGTGTTCAGATAGGAGTGAAGCGCGTCTAAGTATGGAAAGATTCTCTGATCAAGAGAATCCTCTCGCCATCC
1173	GAATGTGTCGTCTGCATAAATTTACTCCAGTAGCAAGACCATTTTAGCAT	CCACAAAGGGCCGAGTTAAG	AGAGAATCCTCTCGCCATCC	CCACAAAGGGCCGAGTTAAGGAATGTGTCGTCTGCATAAATTTACTCCAGTAGCAAGACCATTTTAGCATAGAGAATCCTCTCGCCATCC
1174	AGTGTCCTCAGCGTATAAACTGGGATTACAACAACATCTTGCTCCATCAG	CCACAAAGGGCCGAGTTAAG	AGAGAATCCTCTCGCCATCC	CCACAAAGGGCCGAGTTAAGAGTGTCCTCAGCGTATAAACTGGGATTACAACAACATCTTGCTCCATCAGAGAGAATCCTCTCGCCATCC
1175	GATAGAGTTGAATGATTGTACTTACAGTGAATTTTATATAAAATGAATTT	CCACAAAGGGCCGAGTTAAG	AGAGAATCCTCTCGCCATCC	CCACAAAGGGCCGAGTTAAGGATAGAGTTGAATGATTGTACTTACAGTGAATTTTATATAAAATGAATTTAGAGAATCCTCTCGCCATCC
1176	ATTTATTCGCATGCCCAATTGTCTAGCCACCTCAGTTCATCTATGTTGTA	CCACAAAGGGCCGAGTTAAG	AGAGAATCCTCTCGCCATCC	CCACAAAGGGCCGAGTTAAGATTTATTCGCATGCCCAATTGTCTAGCCACCTCAGTTCATCTATGTTGTAAGAGAATCCTCTCGCCATCC
1177	TCATTGGTCGTTCAAAGAGGGAAATTTTGTCTTATTTAAAGGAAGGAATT	CCACAAAGGGCCGAGTTAAG	AGAGAATCCTCTCGCCATCC	CCACAAAGGGCCGAGTTAAGTCATTGGTCGTTCAAAGAGGGAAATTTTGTCTTATTTAAAGGAAGGAATTAGAGAATCCTCTCGCCATCC
1178	AAGACATAAGGATACAATTATCTCACTACCATAACACCACATACAAAAGC	CCACAAAGGGCCGAGTTAAG	AGAGAATCCTCTCGCCATCC	CCACAAAGGGCCGAGTTAAGAAGACATAAGGATACAATTATCTCACTACCATAACACCACATACAAAAGCAGAGAATCCTCTCGCCATCC
1179	GCTAAGTTAATAAGTAATTCATCGTTTTGTTTGTATTTTGGACTTTTCTT	CCACAAAGGGCCGAGTTAAG	AGAGAATCCTCTCGCCATCC	CCACAAAGGGCCGAGTTAAGGCTAAGTTAATAAGTAATTCATCGTTTTGTTTGTATTTTGGACTTTTCTTAGAGAATCCTCTCGCCATCC
1180	TTGCATAAATAATGGCTTTTAGGAAATATCTTATTATTACACACACACAA	CCACAAAGGGCCGAGTTAAG	AGAGAATCCTCTCGCCATCC	CCACAAAGGGCCGAGTTAAGTTGCATAAATAATGGCTTTTAGGAAATATCTTATTATTACACACACACAAAGAGAATCCTCTCGCCATCC
1181	TGAATTCCAACTGAAGCTTTAAAGAAATTTTGCTGGATATCTTTGCGCAG	CCACAAAGGGCCGAGTTAAG	AGAGAATCCTCTCGCCATCC	CCACAAAGGGCCGAGTTAAGTGAATTCCAACTGAAGCTTTAAAGAAATTTTGCTGGATATCTTTGCGCAGAGAGAATCCTCTCGCCATCC
1182	ACCTGTATGACAAATCTCCTCCTTTCACAATCTAAGAACATGTTGATATC	CCACAAAGGGCCGAGTTAAG	AGAGAATCCTCTCGCCATCC	CCACAAAGGGCCGAGTTAAGACCTGTATGACAAATCTCCTCCTTTCACAATCTAAGAACATGTTGATATCAGAGAATCCTCTCGCCATCC
1183	TAGTGCTTGGAAATTGCAAAAGTAGCATTGGGGCGCAACAAGAACCTGAG	CCACAAAGGGCCGAGTTAAG	AGAGAATCCTCTCGCCATCC	CCACAAAGGGCCGAGTTAAGTAGTGCTTGGAAATTGCAAAAGTAGCATTGGGGCGCAACAAGAACCTGAGAGAGAATCCTCTCGCCATCC
1184	TGAGGTAGAGAAGTGTGGAAACTGTAAGCTATTTTGTTTTAGGATCTTGA	CCACAAAGGGCCGAGTTAAG	AGAGAATCCTCTCGCCATCC	CCACAAAGGGCCGAGTTAAGTGAGGTAGAGAAGTGTGGAAACTGTAAGCTATTTTGTTTTAGGATCTTGAAGAGAATCCTCTCGCCATCC
1185	GTAACCAGCTCTACAACCTTTAACAAATCTGATGAAAAGAATGTGTTTCA	CCACAAAGGGCCGAGTTAAG	AGAGAATCCTCTCGCCATCC	CCACAAAGGGCCGAGTTAAGGTAACCAGCTCTACAACCTTTAACAAATCTGATGAAAAGAATGTGTTTCAAGAGAATCCTCTCGCCATCC
1186	ATAACTCTACTTTACCTACTTTACCACCTGTCATGGGTATTCGTATTCAC	CCACAAAGGGCCGAGTTAAG	AGAGAATCCTCTCGCCATCC	CCACAAAGGGCCGAGTTAAGATAACTCTACTTTACCTACTTTACCACCTGTCATGGGTATTCGTATTCACAGAGAATCCTCTCGCCATCC
1187	TTTGATTCTGTCCCTGGAAATACATTGCACACCCAACAATAGTTAATATA	CCACAAAGGGCCGAGTTAAG	AGAGAATCCTCTCGCCATCC	CCACAAAGGGCCGAGTTAAGTTTGATTCTGTCCCTGGAAATACATTGCACACCCAACAATAGTTAATATAAGAGAATCCTCTCGCCATCC
1188	GTTGTGAAGTAACCATTTTGCTTTGTGAAGTAACCATTTGTAAGAGCCAT	CCACAAAGGGCCGAGTTAAG	AGAGAATCCTCTCGCCATCC	CCACAAAGGGCCGAGTTAAGGTTGTGAAGTAACCATTTTGCTTTGTGAAGTAACCATTTGTAAGAGCCATAGAGAATCCTCTCGCCATCC
1189	TGGCACAAATTATCTCAAAGTTTAAGTGAACCTTATTAAGAATTGGAAAC	CCACAAAGGGCCGAGTTAAG	AGAGAATCCTCTCGCCATCC	CCACAAAGGGCCGAGTTAAGTGGCACAAATTATCTCAAAGTTTAAGTGAACCTTATTAAGAATTGGAAACAGAGAATCCTCTCGCCATCC
1190	GAGCCACACTTTTCTACAACTGTAACTTGTTTAGTAAATTTTGGAGAAGA	CCACAAAGGGCCGAGTTAAG	AGAGAATCCTCTCGCCATCC	CCACAAAGGGCCGAGTTAAGGAGCCACACTTTTCTACAACTGTAACTTGTTTAGTAAATTTTGGAGAAGAAGAGAATCCTCTCGCCATCC
1191	GTATTTCTCAAAATTAGCTAGGAATTTATCGAATCAACTGAAAAGGATAA	CCACAAAGGGCCGAGTTAAG	AGAGAATCCTCTCGCCATCC	CCACAAAGGGCCGAGTTAAGGTATTTCTCAAAATTAGCTAGGAATTTATCGAATCAACTGAAAAGGATAAAGAGAATCCTCTCGCCATCC
1192	CCTCAGGTAGTTTTACAAGAAGGATGACACTGTATTGGTCAACATAGCCA	CCACAAAGGGCCGAGTTAAG	AGAGAATCCTCTCGCCATCC	CCACAAAGGGCCGAGTTAAGCCTCAGGTAGTTTTACAAGAAGGATGACACTGTATTGGTCAACATAGCCAAGAGAATCCTCTCGCCATCC
1193	TAAATATTGGTTAGTGCTATGAAACTCAGAAACATAAAGACATGGTGAAG	CCACAAAGGGCCGAGTTAAG	AGAGAATCCTCTCGCCATCC	CCACAAAGGGCCGAGTTAAGTAAATATTGGTTAGTGCTATGAAACTCAGAAACATAAAGACATGGTGAAGAGAGAATCCTCTCGCCATCC
1194	ATAAATAAAGGTATCTATAATACATCTAAAAGATATGGTATTATAAATTT	CCACAAAGGGCCGAGTTAAG	AGAGAATCCTCTCGCCATCC	CCACAAAGGGCCGAGTTAAGATAAATAAAGGTATCTATAATACATCTAAAAGATATGGTATTATAAATTTAGAGAATCCTCTCGCCATCC
1195	TGAAATTCATTTTAAAAGTGTCTCTGATTCATCATTGATTAATCGTAGAG	CCACAAAGGGCCGAGTTAAG	AGAGAATCCTCTCGCCATCC	CCACAAAGGGCCGAGTTAAGTGAAATTCATTTTAAAAGTGTCTCTGATTCATCATTGATTAATCGTAGAGAGAGAATCCTCTCGCCATCC
1196	TCAACGGTGAAGTTAATACACTTGAGAATGAATATCTAAGAGTATACTAG	CCACAAAGGGCCGAGTTAAG	AGAGAATCCTCTCGCCATCC	CCACAAAGGGCCGAGTTAAGTCAACGGTGAAGTTAATACACTTGAGAATGAATATCTAAGAGTATACTAGAGAGAATCCTCTCGCCATCC
1197	TTACTTATTATATACTAAGTGATTGACCAAAGGAGGAGACATATATATAT	CCACAAAGGGCCGAGTTAAG	AGAGAATCCTCTCGCCATCC	CCACAAAGGGCCGAGTTAAGTTACTTATTATATACTAAGTGATTGACCAAAGGAGGAGACATATATATATAGAGAATCCTCTCGCCATCC
1198	AAAGAATGAAGGTGAATTATGTGGCGATAATCCTTGCTAATATGAACACA	CCACAAAGGGCCGAGTTAAG	AGAGAATCCTCTCGCCATCC	CCACAAAGGGCCGAGTTAAGAAAGAATGAAGGTGAATTATGTGGCGATAATCCTTGCTAATATGAACACAAGAGAATCCTCTCGCCATCC
1199	ATTATAAGTTTTAAGGTGTAGCTAACTTACTTACATAATTTAAGAGATTA	CCACAAAGGGCCGAGTTAAG	AGAGAATCCTCTCGCCATCC	CCACAAAGGGCCGAGTTAAGATTATAAGTTTTAAGGTGTAGCTAACTTACTTACATAATTTAAGAGATTAAGAGAATCCTCTCGCCATCC
1200	GAATAAAAGATTTGTCTGTCATCAATGAAATGCAGATAGGAATTTATATT	CCACAAAGGGCCGAGTTAAG	AGAGAATCCTCTCGCCATCC	CCACAAAGGGCCGAGTTAAGGAATAAAAGATTTGTCTGTCATCAATGAAATGCAGATAGGAATTTATATTAGAGAATCCTCTCGCCATCC
1201	TTTTGAGAAGTTGGATAAAGTATGCCTTTTCTTGCTTTCATAATCAAACT	CCACAAAGGGCCGAGTTAAG	AGAGAATCCTCTCGCCATCC	CCACAAAGGGCCGAGTTAAGTTTTGAGAAGTTGGATAAAGTATGCCTTTTCTTGCTTTCATAATCAAACTAGAGAATCCTCTCGCCATCC
1202	TCTATTTCTTATTGTTTAAGTATTTCCATCATCTCTGCCTTTGACTGAGT	CCACAAAGGGCCGAGTTAAG	AGAGAATCCTCTCGCCATCC	CCACAAAGGGCCGAGTTAAGTCTATTTCTTATTGTTTAAGTATTTCCATCATCTCTGCCTTTGACTGAGTAGAGAATCCTCTCGCCATCC
1203	ATTGGAGATTGAGGTTGAGTTTGGACACACCCTGATACTCATGTTGGTCT	CCACAAAGGGCCGAGTTAAG	AGAGAATCCTCTCGCCATCC	CCACAAAGGGCCGAGTTAAGATTGGAGATTGAGGTTGAGTTTGGACACACCCTGATACTCATGTTGGTCTAGAGAATCCTCTCGCCATCC
1204	ATGAGAAGGTGGGTAGAAAACAAGGAGCAGGAAGGGACTCAATCATGTAT	CCACAAAGGGCCGAGTTAAG	AGAGAATCCTCTCGCCATCC	CCACAAAGGGCCGAGTTAAGATGAGAAGGTGGGTAGAAAACAAGGAGCAGGAAGGGACTCAATCATGTATAGAGAATCCTCTCGCCATCC
1205	CTGTACATATAATAAATCCTATTGAAATGCTCTTTATTTGGATCATGGCT	CCACAAAGGGCCGAGTTAAG	AGAGAATCCTCTCGCCATCC	CCACAAAGGGCCGAGTTAAGCTGTACATATAATAAATCCTATTGAAATGCTCTTTATTTGGATCATGGCTAGAGAATCCTCTCGCCATCC
1206	GCTCAAAATATTCTTCAAGTACTTCTGTTTCTTTGAATATATCCTTAAAT	CCACAAAGGGCCGAGTTAAG	AGAGAATCCTCTCGCCATCC	CCACAAAGGGCCGAGTTAAGGCTCAAAATATTCTTCAAGTACTTCTGTTTCTTTGAATATATCCTTAAATAGAGAATCCTCTCGCCATCC
1207	TTTTCTCTTTAATGGTAAAATCATATATGGCTGCCAAGAAATTTTAGGAA	CCACAAAGGGCCGAGTTAAG	AGAGAATCCTCTCGCCATCC	CCACAAAGGGCCGAGTTAAGTTTTCTCTTTAATGGTAAAATCATATATGGCTGCCAAGAAATTTTAGGAAAGAGAATCCTCTCGCCATCC
1208	AAAAGAGAAGAAAGAACTAATGATTTTACTTAATGAGATCAACATACACG	CCACAAAGGGCCGAGTTAAG	AGAGAATCCTCTCGCCATCC	CCACAAAGGGCCGAGTTAAGAAAAGAGAAGAAAGAACTAATGATTTTACTTAATGAGATCAACATACACGAGAGAATCCTCTCGCCATCC
1209	GCATTGCTTAATAATACGTATTTTAATTAGCTTAGTTATATTTTATTTTC	CCACAAAGGGCCGAGTTAAG	AGAGAATCCTCTCGCCATCC	CCACAAAGGGCCGAGTTAAGGCATTGCTTAATAATACGTATTTTAATTAGCTTAGTTATATTTTATTTTCAGAGAATCCTCTCGCCATCC
1210	AATATTTTGTTTCTTTCTTGCTATAATACTAAATTTCCTCTTACAAAGAC	CCACAAAGGGCCGAGTTAAG	AGAGAATCCTCTCGCCATCC	CCACAAAGGGCCGAGTTAAGAATATTTTGTTTCTTTCTTGCTATAATACTAAATTTCCTCTTACAAAGACAGAGAATCCTCTCGCCATCC
1211	ATTAAACAATTTGAAATGTGGAAGAGCAATTGAGATCACACAGTGTTTAT	CCACAAAGGGCCGAGTTAAG	AGAGAATCCTCTCGCCATCC	CCACAAAGGGCCGAGTTAAGATTAAACAATTTGAAATGTGGAAGAGCAATTGAGATCACACAGTGTTTATAGAGAATCCTCTCGCCATCC
1212	GTTCTTATCTTTAGAATGTTCAAACTCTGCAAGGCCAGATGTTTCATGGA	CCACAAAGGGCCGAGTTAAG	AGAGAATCCTCTCGCCATCC	CCACAAAGGGCCGAGTTAAGGTTCTTATCTTTAGAATGTTCAAACTCTGCAAGGCCAGATGTTTCATGGAAGAGAATCCTCTCGCCATCC
1213	TGTTTTATCATCTATATTCCCCGCTTCGATTACTGCTGAAATCATTAAGA	CCACAAAGGGCCGAGTTAAG	AGAGAATCCTCTCGCCATCC	CCACAAAGGGCCGAGTTAAGTGTTTTATCATCTATATTCCCCGCTTCGATTACTGCTGAAATCATTAAGAAGAGAATCCTCTCGCCATCC
1214	TTCTCAATTCAGAAGTGAGCTTGGTCCTATTTGGGTTAGTGATCTTATAT	CCACAAAGGGCCGAGTTAAG	AGAGAATCCTCTCGCCATCC	CCACAAAGGGCCGAGTTAAGTTCTCAATTCAGAAGTGAGCTTGGTCCTATTTGGGTTAGTGATCTTATATAGAGAATCCTCTCGCCATCC
1215	AACATTGCAAAGAGAGATAGGACAAAACTGTTCAACCCTATTAGCAGATT	CCACAAAGGGCCGAGTTAAG	AGAGAATCCTCTCGCCATCC	CCACAAAGGGCCGAGTTAAGAACATTGCAAAGAGAGATAGGACAAAACTGTTCAACCCTATTAGCAGATTAGAGAATCCTCTCGCCATCC
1216	AGTTAGAGACAATAATTTGGAGGTTGATATGTGATGCCCAACAAATAACA	CCACAAAGGGCCGAGTTAAG	AGAGAATCCTCTCGCCATCC	CCACAAAGGGCCGAGTTAAGAGTTAGAGACAATAATTTGGAGGTTGATATGTGATGCCCAACAAATAACAAGAGAATCCTCTCGCCATCC
1217	CAAATGTTTGGACTTTAATACTTATCTTGTCAGCTTCAGCCTTGCCACGG	CCACAAAGGGCCGAGTTAAG	AGAGAATCCTCTCGCCATCC	CCACAAAGGGCCGAGTTAAGCAAATGTTTGGACTTTAATACTTATCTTGTCAGCTTCAGCCTTGCCACGGAGAGAATCCTCTCGCCATCC
1218	GTAAACCAACAACCAAAACAAGAACGCGGAGAAAGAAAGAACAGAAAGAG	CCACAAAGGGCCGAGTTAAG	AGAGAATCCTCTCGCCATCC	CCACAAAGGGCCGAGTTAAGGTAAACCAACAACCAAAACAAGAACGCGGAGAAAGAAAGAACAGAAAGAGAGAGAATCCTCTCGCCATCC
1219	AAAGGTAATCAATTTAGTAAAATCAAACACAAACCATATTTAAAGTCCAT	CCACAAAGGGCCGAGTTAAG	AGAGAATCCTCTCGCCATCC	CCACAAAGGGCCGAGTTAAGAAAGGTAATCAATTTAGTAAAATCAAACACAAACCATATTTAAAGTCCATAGAGAATCCTCTCGCCATCC
1220	GTTGTGAGAGTTATCTTTAAGTATTGATAAATTTGAAAGGGAATGGAGAG	CCACAAAGGGCCGAGTTAAG	AGAGAATCCTCTCGCCATCC	CCACAAAGGGCCGAGTTAAGGTTGTGAGAGTTATCTTTAAGTATTGATAAATTTGAAAGGGAATGGAGAGAGAGAATCCTCTCGCCATCC
1221	TTAGTAGAATTGAATTTCTTCCTTAAGCTTTAATATTCTTCCAAATTTGT	CCACAAAGGGCCGAGTTAAG	AGAGAATCCTCTCGCCATCC	CCACAAAGGGCCGAGTTAAGTTAGTAGAATTGAATTTCTTCCTTAAGCTTTAATATTCTTCCAAATTTGTAGAGAATCCTCTCGCCATCC
1222	TTGATATCTTTTGCACTTTAGGGACGGGATATCTAGAATCAAGAAAATTG	CCACAAAGGGCCGAGTTAAG	AGAGAATCCTCTCGCCATCC	CCACAAAGGGCCGAGTTAAGTTGATATCTTTTGCACTTTAGGGACGGGATATCTAGAATCAAGAAAATTGAGAGAATCCTCTCGCCATCC
1223	AACAAACTTGATGAAGAAAGAAATCTCGAAATTCTATAACATCCTTTAGC	CCACAAAGGGCCGAGTTAAG	AGAGAATCCTCTCGCCATCC	CCACAAAGGGCCGAGTTAAGAACAAACTTGATGAAGAAAGAAATCTCGAAATTCTATAACATCCTTTAGCAGAGAATCCTCTCGCCATCC
1224	AGAGCAGTACCCCAAGCCGATAAATATCAGAAGCACATGAATCTGGAGCT	CCACAAAGGGCCGAGTTAAG	AGAGAATCCTCTCGCCATCC	CCACAAAGGGCCGAGTTAAGAGAGCAGTACCCCAAGCCGATAAATATCAGAAGCACATGAATCTGGAGCTAGAGAATCCTCTCGCCATCC
1225	ATTTTGGCATGATACACAAGAAATTCACTCCTATCTGAAACTAGACATCT	CCACAAAGGGCCGAGTTAAG	AGAGAATCCTCTCGCCATCC	CCACAAAGGGCCGAGTTAAGATTTTGGCATGATACACAAGAAATTCACTCCTATCTGAAACTAGACATCTAGAGAATCCTCTCGCCATCC
1226	ATTATTGTGGATGTCTTTTCTATCTTATAACTAATTAAATACCTATCAAA	CCACAAAGGGCCGAGTTAAG	AGAGAATCCTCTCGCCATCC	CCACAAAGGGCCGAGTTAAGATTATTGTGGATGTCTTTTCTATCTTATAACTAATTAAATACCTATCAAAAGAGAATCCTCTCGCCATCC
1227	TTTTGAAGTTATTCTTTTAGAAGGAATATGTATTTTCTTATAGAACAAAA	CCACAAAGGGCCGAGTTAAG	AGAGAATCCTCTCGCCATCC	CCACAAAGGGCCGAGTTAAGTTTTGAAGTTATTCTTTTAGAAGGAATATGTATTTTCTTATAGAACAAAAAGAGAATCCTCTCGCCATCC
1228	AGATGGTTTGATGTGCATATTGGGGATTAGAAACTGAATAAATTGGGATT	CCACAAAGGGCCGAGTTAAG	AGAGAATCCTCTCGCCATCC	CCACAAAGGGCCGAGTTAAGAGATGGTTTGATGTGCATATTGGGGATTAGAAACTGAATAAATTGGGATTAGAGAATCCTCTCGCCATCC
1229	GATGGTTAGTATTCTTAAATCTTTTGGTATTAGAGTCCCTTTGTCCAGTA	CCACAAAGGGCCGAGTTAAG	AGAGAATCCTCTCGCCATCC	CCACAAAGGGCCGAGTTAAGGATGGTTAGTATTCTTAAATCTTTTGGTATTAGAGTCCCTTTGTCCAGTAAGAGAATCCTCTCGCCATCC
1230	AAGTCATTCAAATATGAGATGGCTATATCCAGAGATCAATGCCCAAGAAT	CCACAAAGGGCCGAGTTAAG	AGAGAATCCTCTCGCCATCC	CCACAAAGGGCCGAGTTAAGAAGTCATTCAAATATGAGATGGCTATATCCAGAGATCAATGCCCAAGAATAGAGAATCCTCTCGCCATCC
1231	CCAAGAAACAGTAGAAACTACAAACGAAGATTATCCACGAATACAGAAAA	CCACAAAGGGCCGAGTTAAG	AGAGAATCCTCTCGCCATCC	CCACAAAGGGCCGAGTTAAGCCAAGAAACAGTAGAAACTACAAACGAAGATTATCCACGAATACAGAAAAAGAGAATCCTCTCGCCATCC
1232	AATTCAACGTGTGAAGTAATTAATATTGACAAAGAAAATACTACGAGTAT	CCACAAAGGGCCGAGTTAAG	AGAGAATCCTCTCGCCATCC	CCACAAAGGGCCGAGTTAAGAATTCAACGTGTGAAGTAATTAATATTGACAAAGAAAATACTACGAGTATAGAGAATCCTCTCGCCATCC
1233	TAATTCGAATATGACTAGATCCTAACTTTGTTCCATTCAAGTTCATCTTA	CCACAAAGGGCCGAGTTAAG	AGAGAATCCTCTCGCCATCC	CCACAAAGGGCCGAGTTAAGTAATTCGAATATGACTAGATCCTAACTTTGTTCCATTCAAGTTCATCTTAAGAGAATCCTCTCGCCATCC
1234	CTTGTAAATTCCTAGATGTAAGAAAATCTTAGGAAATGAAAAGGATTCTT	CCACAAAGGGCCGAGTTAAG	AGAGAATCCTCTCGCCATCC	CCACAAAGGGCCGAGTTAAGCTTGTAAATTCCTAGATGTAAGAAAATCTTAGGAAATGAAAAGGATTCTTAGAGAATCCTCTCGCCATCC
1235	CATTCTTCTAAGTAATAGTTGAACTCTGAAAACGTAACATTGACCAACTC	CCACAAAGGGCCGAGTTAAG	AGAGAATCCTCTCGCCATCC	CCACAAAGGGCCGAGTTAAGCATTCTTCTAAGTAATAGTTGAACTCTGAAAACGTAACATTGACCAACTCAGAGAATCCTCTCGCCATCC
1236	TCAACTCTTACTTAGAAGAATGTTTTACTCTAACTCATACTCACCTCAAA	CCACAAAGGGCCGAGTTAAG	AGAGAATCCTCTCGCCATCC	CCACAAAGGGCCGAGTTAAGTCAACTCTTACTTAGAAGAATGTTTTACTCTAACTCATACTCACCTCAAAAGAGAATCCTCTCGCCATCC
1237	CTAAATTCCTCAATCTTCTTTTCCATATCGTGTGAGCTCCATATATATAT	CCACAAAGGGCCGAGTTAAG	AGAGAATCCTCTCGCCATCC	CCACAAAGGGCCGAGTTAAGCTAAATTCCTCAATCTTCTTTTCCATATCGTGTGAGCTCCATATATATATAGAGAATCCTCTCGCCATCC
1238	ATGAGTAAATTCATGATATTGATGATAGAGTATTCATTCATTCCCCACGA	CCACAAAGGGCCGAGTTAAG	AGAGAATCCTCTCGCCATCC	CCACAAAGGGCCGAGTTAAGATGAGTAAATTCATGATATTGATGATAGAGTATTCATTCATTCCCCACGAAGAGAATCCTCTCGCCATCC
1239	AAACACTTTACAGATGTCTCATTCTAATAAATATATCATTCCCGATCAAT	CCACAAAGGGCCGAGTTAAG	AGAGAATCCTCTCGCCATCC	CCACAAAGGGCCGAGTTAAGAAACACTTTACAGATGTCTCATTCTAATAAATATATCATTCCCGATCAATAGAGAATCCTCTCGCCATCC
1240	ATTGGAGCCCATGACAAATTAGGTGAAATCAAAGAGAAGTAGAGGAAATA	CCACAAAGGGCCGAGTTAAG	AGAGAATCCTCTCGCCATCC	CCACAAAGGGCCGAGTTAAGATTGGAGCCCATGACAAATTAGGTGAAATCAAAGAGAAGTAGAGGAAATAAGAGAATCCTCTCGCCATCC
1241	GAGCTTCATGTAGGAATTGTTACTTCAGTTTCTTGAGTTGTAACCAATTA	CCACAAAGGGCCGAGTTAAG	AGAGAATCCTCTCGCCATCC	CCACAAAGGGCCGAGTTAAGGAGCTTCATGTAGGAATTGTTACTTCAGTTTCTTGAGTTGTAACCAATTAAGAGAATCCTCTCGCCATCC
1242	GAATTTTGCCATCTCTTGATATGCGCCAATTGAGTAGGGATGGAAGGATG	CCACAAAGGGCCGAGTTAAG	AGAGAATCCTCTCGCCATCC	CCACAAAGGGCCGAGTTAAGGAATTTTGCCATCTCTTGATATGCGCCAATTGAGTAGGGATGGAAGGATGAGAGAATCCTCTCGCCATCC
1243	AAATAAATAAGAATGAAACTAATAAGACACTCTAATGTAGTTATATTATC	CCACAAAGGGCCGAGTTAAG	AGAGAATCCTCTCGCCATCC	CCACAAAGGGCCGAGTTAAGAAATAAATAAGAATGAAACTAATAAGACACTCTAATGTAGTTATATTATCAGAGAATCCTCTCGCCATCC
1244	CATCCAGAGGCTTTGACGACTGATCCTGATATTGTTGGAGCCTTAAGGTA	CCACAAAGGGCCGAGTTAAG	AGAGAATCCTCTCGCCATCC	CCACAAAGGGCCGAGTTAAGCATCCAGAGGCTTTGACGACTGATCCTGATATTGTTGGAGCCTTAAGGTAAGAGAATCCTCTCGCCATCC
1245	CTATACTCTTATTAGCCTATTTCTAAATATACAAGATTTTATCAAGTGCA	CCACAAAGGGCCGAGTTAAG	AGAGAATCCTCTCGCCATCC	CCACAAAGGGCCGAGTTAAGCTATACTCTTATTAGCCTATTTCTAAATATACAAGATTTTATCAAGTGCAAGAGAATCCTCTCGCCATCC
1246	TACATGTAACCGTAACATTTCCAACCTGTCAAAGTCGAGTAAAATCATTG	CCACAAAGGGCCGAGTTAAG	AGAGAATCCTCTCGCCATCC	CCACAAAGGGCCGAGTTAAGTACATGTAACCGTAACATTTCCAACCTGTCAAAGTCGAGTAAAATCATTGAGAGAATCCTCTCGCCATCC
1247	TCATCACAGGACCAAATCTATGAAAACTGTAGAAGCATCCCTCAGACTTG	CCACAAAGGGCCGAGTTAAG	AGAGAATCCTCTCGCCATCC	CCACAAAGGGCCGAGTTAAGTCATCACAGGACCAAATCTATGAAAACTGTAGAAGCATCCCTCAGACTTGAGAGAATCCTCTCGCCATCC
1248	TGAGAATGGTATTTGTGGCTATGATTGATTTACTTTTACGTTTAAATAAA	CCACAAAGGGCCGAGTTAAG	AGAGAATCCTCTCGCCATCC	CCACAAAGGGCCGAGTTAAGTGAGAATGGTATTTGTGGCTATGATTGATTTACTTTTACGTTTAAATAAAAGAGAATCCTCTCGCCATCC
1249	AGGTAAAGCATTTCCTATTGCACCTTCCACAGTTATAAGGGTTGAACAAT	CCACAAAGGGCCGAGTTAAG	AGAGAATCCTCTCGCCATCC	CCACAAAGGGCCGAGTTAAGAGGTAAAGCATTTCCTATTGCACCTTCCACAGTTATAAGGGTTGAACAATAGAGAATCCTCTCGCCATCC
1250	TTCCCTTCCCTCTCTATCTATGTCTTTCCCTTAGATTCTACTCTTTTAAT	CCACAAAGGGCCGAGTTAAG	AGAGAATCCTCTCGCCATCC	CCACAAAGGGCCGAGTTAAGTTCCCTTCCCTCTCTATCTATGTCTTTCCCTTAGATTCTACTCTTTTAATAGAGAATCCTCTCGCCATCC
1251	TTTTAATAATACTATTAATAAAGATGATTATTGACTTTACAAAACTATTC	CCACAAAGGGCCGAGTTAAG	AGAGAATCCTCTCGCCATCC	CCACAAAGGGCCGAGTTAAGTTTTAATAATACTATTAATAAAGATGATTATTGACTTTACAAAACTATTCAGAGAATCCTCTCGCCATCC
1252	TCACCAAAATATTTTCATTCAACGTGTTATGCAATTTTCTTTCTTATTAA	CCACAAAGGGCCGAGTTAAG	AGAGAATCCTCTCGCCATCC	CCACAAAGGGCCGAGTTAAGTCACCAAAATATTTTCATTCAACGTGTTATGCAATTTTCTTTCTTATTAAAGAGAATCCTCTCGCCATCC
1253	TAGTAGGGAATAGCCATGTGATTTCGCCAAAAGTCAAACACGATTTATTG	CCACAAAGGGCCGAGTTAAG	AGAGAATCCTCTCGCCATCC	CCACAAAGGGCCGAGTTAAGTAGTAGGGAATAGCCATGTGATTTCGCCAAAAGTCAAACACGATTTATTGAGAGAATCCTCTCGCCATCC
1254	GAGGATCATTAGCAGTAGTTATTTAGATGTAAGATGTTTCTAGATGAGCA	CCACAAAGGGCCGAGTTAAG	AGAGAATCCTCTCGCCATCC	CCACAAAGGGCCGAGTTAAGGAGGATCATTAGCAGTAGTTATTTAGATGTAAGATGTTTCTAGATGAGCAAGAGAATCCTCTCGCCATCC
1255	ATATGCACATTGTCCAAATCTTACCATCATTGACACCCCAGGCTTTGTTC	CCACAAAGGGCCGAGTTAAG	AGAGAATCCTCTCGCCATCC	CCACAAAGGGCCGAGTTAAGATATGCACATTGTCCAAATCTTACCATCATTGACACCCCAGGCTTTGTTCAGAGAATCCTCTCGCCATCC
1256	AAACAAGAATTTCAAAAGAGGAAAGGAAAACTAGCAAAACTCAGCTGTCC	CCACAAAGGGCCGAGTTAAG	AGAGAATCCTCTCGCCATCC	CCACAAAGGGCCGAGTTAAGAAACAAGAATTTCAAAAGAGGAAAGGAAAACTAGCAAAACTCAGCTGTCCAGAGAATCCTCTCGCCATCC
1257	ACTTTGAGACAACAATCACAGTTCTTCTAAAGGTCGGATCAATCTCGCGA	CCACAAAGGGCCGAGTTAAG	AGAGAATCCTCTCGCCATCC	CCACAAAGGGCCGAGTTAAGACTTTGAGACAACAATCACAGTTCTTCTAAAGGTCGGATCAATCTCGCGAAGAGAATCCTCTCGCCATCC
1258	CTGTTGGATTATGATTTCCTTTATAATTTGTGTAGGGAGCACTTATTGAT	CCACAAAGGGCCGAGTTAAG	AGAGAATCCTCTCGCCATCC	CCACAAAGGGCCGAGTTAAGCTGTTGGATTATGATTTCCTTTATAATTTGTGTAGGGAGCACTTATTGATAGAGAATCCTCTCGCCATCC
1259	CAGTGTCGAGGGAGAAGGTAGGTGTTTGGAAATTTTAATAAGAACTCATG	CCACAAAGGGCCGAGTTAAG	AGAGAATCCTCTCGCCATCC	CCACAAAGGGCCGAGTTAAGCAGTGTCGAGGGAGAAGGTAGGTGTTTGGAAATTTTAATAAGAACTCATGAGAGAATCCTCTCGCCATCC
1260	CACAGCTTGCGATAGGCTTGCCTTCGTTTTGAGAAAGCTTTTCGATATTG	CCACAAAGGGCCGAGTTAAG	AGAGAATCCTCTCGCCATCC	CCACAAAGGGCCGAGTTAAGCACAGCTTGCGATAGGCTTGCCTTCGTTTTGAGAAAGCTTTTCGATATTGAGAGAATCCTCTCGCCATCC
1261	CTATGTTTTGTTTCAACCATAATAGTCAATGCCAAGATCAACAACCAAAA	CCACAAAGGGCCGAGTTAAG	AGAGAATCCTCTCGCCATCC	CCACAAAGGGCCGAGTTAAGCTATGTTTTGTTTCAACCATAATAGTCAATGCCAAGATCAACAACCAAAAAGAGAATCCTCTCGCCATCC
1262	TAAATAATACATGAGATTACAGGTTTGGCATTCATTGTGAACATCTTGTA	CCACAAAGGGCCGAGTTAAG	AGAGAATCCTCTCGCCATCC	CCACAAAGGGCCGAGTTAAGTAAATAATACATGAGATTACAGGTTTGGCATTCATTGTGAACATCTTGTAAGAGAATCCTCTCGCCATCC
1263	TAATAACTATTACCAATTGATTGCAAGTTTGACTTCTTTCCTTGTCCTTG	CCACAAAGGGCCGAGTTAAG	AGAGAATCCTCTCGCCATCC	CCACAAAGGGCCGAGTTAAGTAATAACTATTACCAATTGATTGCAAGTTTGACTTCTTTCCTTGTCCTTGAGAGAATCCTCTCGCCATCC
1264	CCTAATACATTACTCCTAAGTTTGTTTATAGAATCTAATATATCTTATAT	CCACAAAGGGCCGAGTTAAG	AGAGAATCCTCTCGCCATCC	CCACAAAGGGCCGAGTTAAGCCTAATACATTACTCCTAAGTTTGTTTATAGAATCTAATATATCTTATATAGAGAATCCTCTCGCCATCC
1265	CCTCGAATTTCGGGCGGCTCTTCTTCTTCGGCTTCGGCTTCGGCTTCTGC	CCACAAAGGGCCGAGTTAAG	AGAGAATCCTCTCGCCATCC	CCACAAAGGGCCGAGTTAAGCCTCGAATTTCGGGCGGCTCTTCTTCTTCGGCTTCGGCTTCGGCTTCTGCAGAGAATCCTCTCGCCATCC
1266	GTCTCTTTGTCTGTCTCTTCTTGTCTCTCTCTCTTGAAACCTCTGAAACA	CCACAAAGGGCCGAGTTAAG	AGAGAATCCTCTCGCCATCC	CCACAAAGGGCCGAGTTAAGGTCTCTTTGTCTGTCTCTTCTTGTCTCTCTCTCTTGAAACCTCTGAAACAAGAGAATCCTCTCGCCATCC
1267	TTGATTAATCGGTTCAGCTTTGTGTGTATGTATGTGAAAGTGCATTTATG	CCACAAAGGGCCGAGTTAAG	AGAGAATCCTCTCGCCATCC	CCACAAAGGGCCGAGTTAAGTTGATTAATCGGTTCAGCTTTGTGTGTATGTATGTGAAAGTGCATTTATGAGAGAATCCTCTCGCCATCC
1268	AACAAAAGTTTTATAACATGTATAAGCCAAGTAAACTTTAGTGTAAACTA	CCACAAAGGGCCGAGTTAAG	AGAGAATCCTCTCGCCATCC	CCACAAAGGGCCGAGTTAAGAACAAAAGTTTTATAACATGTATAAGCCAAGTAAACTTTAGTGTAAACTAAGAGAATCCTCTCGCCATCC
1269	CATTCTTTATGGCCATGGTGCTTTCTCAGTAGTAGCGGCGGAACTAGACA	CCACAAAGGGCCGAGTTAAG	AGAGAATCCTCTCGCCATCC	CCACAAAGGGCCGAGTTAAGCATTCTTTATGGCCATGGTGCTTTCTCAGTAGTAGCGGCGGAACTAGACAAGAGAATCCTCTCGCCATCC
1270	TTGTGTGTTCTTAAGATATAGCCCTATTCACAAAGGTACAAATTCTTGCA	CCACAAAGGGCCGAGTTAAG	AGAGAATCCTCTCGCCATCC	CCACAAAGGGCCGAGTTAAGTTGTGTGTTCTTAAGATATAGCCCTATTCACAAAGGTACAAATTCTTGCAAGAGAATCCTCTCGCCATCC
1271	TCCCTTTTGTCAATCATCACTAGCTCTTCTTTGTCTAGGATTGCTAAAAC	CCACAAAGGGCCGAGTTAAG	AGAGAATCCTCTCGCCATCC	CCACAAAGGGCCGAGTTAAGTCCCTTTTGTCAATCATCACTAGCTCTTCTTTGTCTAGGATTGCTAAAACAGAGAATCCTCTCGCCATCC
1272	AGATCGATGGCATTATTTGTTAAGGCATCCATCCTCATCCATTATTTTGT	CCACAAAGGGCCGAGTTAAG	AGAGAATCCTCTCGCCATCC	CCACAAAGGGCCGAGTTAAGAGATCGATGGCATTATTTGTTAAGGCATCCATCCTCATCCATTATTTTGTAGAGAATCCTCTCGCCATCC
1273	TCTTTGTTGCTCGATCCTTAACAATGAAATAATTAGGATGTCACTCAAAG	CCACAAAGGGCCGAGTTAAG	AGAGAATCCTCTCGCCATCC	CCACAAAGGGCCGAGTTAAGTCTTTGTTGCTCGATCCTTAACAATGAAATAATTAGGATGTCACTCAAAGAGAGAATCCTCTCGCCATCC
1274	ACTTTTACAACTTGACCCAAAATAGAGTCTAAAGTTATGACAAGGTTCCA	CCACAAAGGGCCGAGTTAAG	AGAGAATCCTCTCGCCATCC	CCACAAAGGGCCGAGTTAAGACTTTTACAACTTGACCCAAAATAGAGTCTAAAGTTATGACAAGGTTCCAAGAGAATCCTCTCGCCATCC
1275	ATAATCCTGCAGAAATTCTGTTTCTCACCGATGTCTATCAAGAAGCTACA	CCACAAAGGGCCGAGTTAAG	AGAGAATCCTCTCGCCATCC	CCACAAAGGGCCGAGTTAAGATAATCCTGCAGAAATTCTGTTTCTCACCGATGTCTATCAAGAAGCTACAAGAGAATCCTCTCGCCATCC
1276	ACCCTTCATATTAACATTTTAACTAAATCAACCACTTGCTTTCAGAATTA	CCACAAAGGGCCGAGTTAAG	AGAGAATCCTCTCGCCATCC	CCACAAAGGGCCGAGTTAAGACCCTTCATATTAACATTTTAACTAAATCAACCACTTGCTTTCAGAATTAAGAGAATCCTCTCGCCATCC
1277	AACTTACACAAGCACATAACTGTACTATATTATACATCACAATCTGCATA	CCACAAAGGGCCGAGTTAAG	AGAGAATCCTCTCGCCATCC	CCACAAAGGGCCGAGTTAAGAACTTACACAAGCACATAACTGTACTATATTATACATCACAATCTGCATAAGAGAATCCTCTCGCCATCC
1278	GTATGATGGCGGTTTTGTGTTGTTGCATCTTTTGATTAACTTGAGCAAAT	CCACAAAGGGCCGAGTTAAG	AGAGAATCCTCTCGCCATCC	CCACAAAGGGCCGAGTTAAGGTATGATGGCGGTTTTGTGTTGTTGCATCTTTTGATTAACTTGAGCAAATAGAGAATCCTCTCGCCATCC
1279	AAACTGAACAGACTCTCATACGTAAACCTTAACAGATCACAGATGGAGTT	CCACAAAGGGCCGAGTTAAG	AGAGAATCCTCTCGCCATCC	CCACAAAGGGCCGAGTTAAGAAACTGAACAGACTCTCATACGTAAACCTTAACAGATCACAGATGGAGTTAGAGAATCCTCTCGCCATCC
1280	ATTCTGAGAATCTGTGCTTTTGTTTATATCTATCAAATTATTGTTACCTC	CCACAAAGGGCCGAGTTAAG	AGAGAATCCTCTCGCCATCC	CCACAAAGGGCCGAGTTAAGATTCTGAGAATCTGTGCTTTTGTTTATATCTATCAAATTATTGTTACCTCAGAGAATCCTCTCGCCATCC
1281	GTTTCCATTCAATTATAAAGTCGAAACAATCAGAGGTGGATCAACTGAAA	CCACAAAGGGCCGAGTTAAG	AGAGAATCCTCTCGCCATCC	CCACAAAGGGCCGAGTTAAGGTTTCCATTCAATTATAAAGTCGAAACAATCAGAGGTGGATCAACTGAAAAGAGAATCCTCTCGCCATCC
1282	AACTACAAGTTCATCATAATAACCATGCCCCTGGATTCCTTTGACCATTT	CCACAAAGGGCCGAGTTAAG	AGAGAATCCTCTCGCCATCC	CCACAAAGGGCCGAGTTAAGAACTACAAGTTCATCATAATAACCATGCCCCTGGATTCCTTTGACCATTTAGAGAATCCTCTCGCCATCC
1283	TTGGTGTCTTTGTTCGCATCTAAATGTACTTTCTGGCCAACAAAATGGAG	CCACAAAGGGCCGAGTTAAG	AGAGAATCCTCTCGCCATCC	CCACAAAGGGCCGAGTTAAGTTGGTGTCTTTGTTCGCATCTAAATGTACTTTCTGGCCAACAAAATGGAGAGAGAATCCTCTCGCCATCC
1284	AGTGGTTACTTTGTACTAAGGTCTCATGATATTGTTCCTTTGCTCCAACC	CCACAAAGGGCCGAGTTAAG	AGAGAATCCTCTCGCCATCC	CCACAAAGGGCCGAGTTAAGAGTGGTTACTTTGTACTAAGGTCTCATGATATTGTTCCTTTGCTCCAACCAGAGAATCCTCTCGCCATCC
1285	TTTTGTTTGTCTATTTCTTTTAGTGAATGTCAGTGAAGAATTAAATTGGA	CCACAAAGGGCCGAGTTAAG	AGAGAATCCTCTCGCCATCC	CCACAAAGGGCCGAGTTAAGTTTTGTTTGTCTATTTCTTTTAGTGAATGTCAGTGAAGAATTAAATTGGAAGAGAATCCTCTCGCCATCC
1286	AGTATATAAAGTTTATCCTTGCCTAACCAATTTGTTAACAATTCATTATT	CCACAAAGGGCCGAGTTAAG	AGAGAATCCTCTCGCCATCC	CCACAAAGGGCCGAGTTAAGAGTATATAAAGTTTATCCTTGCCTAACCAATTTGTTAACAATTCATTATTAGAGAATCCTCTCGCCATCC
1287	CCAGAATATATTCAAAAGTAGTGACCCGGATTTGATGACCTACCTCTTCA	CCACAAAGGGCCGAGTTAAG	AGAGAATCCTCTCGCCATCC	CCACAAAGGGCCGAGTTAAGCCAGAATATATTCAAAAGTAGTGACCCGGATTTGATGACCTACCTCTTCAAGAGAATCCTCTCGCCATCC
1288	CAAAACAATATCATAACGTCTTATGCATTCAGGGGAGACTTATACTAAAC	CCACAAAGGGCCGAGTTAAG	AGAGAATCCTCTCGCCATCC	CCACAAAGGGCCGAGTTAAGCAAAACAATATCATAACGTCTTATGCATTCAGGGGAGACTTATACTAAACAGAGAATCCTCTCGCCATCC
1289	TGTCTTCATTGCCTACTATAAGAGGAATAGCATTCAAAAGAGACGTCTGA	CCACAAAGGGCCGAGTTAAG	AGAGAATCCTCTCGCCATCC	CCACAAAGGGCCGAGTTAAGTGTCTTCATTGCCTACTATAAGAGGAATAGCATTCAAAAGAGACGTCTGAAGAGAATCCTCTCGCCATCC
1290	CAAATGAAGGTCGAAAGTGGAAGGATGATGTACTAATTCAGCTCTGTTCT	CCACAAAGGGCCGAGTTAAG	AGAGAATCCTCTCGCCATCC	CCACAAAGGGCCGAGTTAAGCAAATGAAGGTCGAAAGTGGAAGGATGATGTACTAATTCAGCTCTGTTCTAGAGAATCCTCTCGCCATCC
1291	TTGTCTAAATACATTAACAGTCTTAGTTCTCACCGATCCATCACAACTTG	CCACAAAGGGCCGAGTTAAG	AGAGAATCCTCTCGCCATCC	CCACAAAGGGCCGAGTTAAGTTGTCTAAATACATTAACAGTCTTAGTTCTCACCGATCCATCACAACTTGAGAGAATCCTCTCGCCATCC
1292	TTATTATAAAATTTGATTATGGTATCATTTCCTACCTGAGTTGAGACAAC	CCACAAAGGGCCGAGTTAAG	AGAGAATCCTCTCGCCATCC	CCACAAAGGGCCGAGTTAAGTTATTATAAAATTTGATTATGGTATCATTTCCTACCTGAGTTGAGACAACAGAGAATCCTCTCGCCATCC
1293	TTGTTATTTCTTTCCCCATTTTAGTTAATAAGTTTCAACGGTTCCTCTCC	CCACAAAGGGCCGAGTTAAG	AGAGAATCCTCTCGCCATCC	CCACAAAGGGCCGAGTTAAGTTGTTATTTCTTTCCCCATTTTAGTTAATAAGTTTCAACGGTTCCTCTCCAGAGAATCCTCTCGCCATCC
1294	GAACAGACAAGAAGAAATGAATCATGGTTAAAATAACAAAGAATGACTAC	CCACAAAGGGCCGAGTTAAG	AGAGAATCCTCTCGCCATCC	CCACAAAGGGCCGAGTTAAGGAACAGACAAGAAGAAATGAATCATGGTTAAAATAACAAAGAATGACTACAGAGAATCCTCTCGCCATCC
1295	TTCAATTTATTCACAGAAAGTATCATGACATAGTATAATATTATCGCATT	CCACAAAGGGCCGAGTTAAG	AGAGAATCCTCTCGCCATCC	CCACAAAGGGCCGAGTTAAGTTCAATTTATTCACAGAAAGTATCATGACATAGTATAATATTATCGCATTAGAGAATCCTCTCGCCATCC
1296	TCACGCACATAAGTTCAGCCCTCCCCAAAGACAACACTAGAGAGAGAGAG	CCACAAAGGGCCGAGTTAAG	AGAGAATCCTCTCGCCATCC	CCACAAAGGGCCGAGTTAAGTCACGCACATAAGTTCAGCCCTCCCCAAAGACAACACTAGAGAGAGAGAGAGAGAATCCTCTCGCCATCC
1297	TACCGAGCAAACTAAAGGTGTTCTTGCCGATTAAAATTAAGAATTGATCA	CCACAAAGGGCCGAGTTAAG	AGAGAATCCTCTCGCCATCC	CCACAAAGGGCCGAGTTAAGTACCGAGCAAACTAAAGGTGTTCTTGCCGATTAAAATTAAGAATTGATCAAGAGAATCCTCTCGCCATCC
1298	ATGATAGTATTATTTATAATAGGCATGCAGTCGTTCAATTTCAAAAGAGT	CCACAAAGGGCCGAGTTAAG	AGAGAATCCTCTCGCCATCC	CCACAAAGGGCCGAGTTAAGATGATAGTATTATTTATAATAGGCATGCAGTCGTTCAATTTCAAAAGAGTAGAGAATCCTCTCGCCATCC
1299	GGACTTGTGAAAGTTGAATGCATTTCTCTAAGGTTACCTATGATTTGATT	CCACAAAGGGCCGAGTTAAG	AGAGAATCCTCTCGCCATCC	CCACAAAGGGCCGAGTTAAGGGACTTGTGAAAGTTGAATGCATTTCTCTAAGGTTACCTATGATTTGATTAGAGAATCCTCTCGCCATCC
1300	CCGAAATCAGCTCGTGTTAATTATTTTACATAAGCTTATCTGATAATATA	CCACAAAGGGCCGAGTTAAG	AGAGAATCCTCTCGCCATCC	CCACAAAGGGCCGAGTTAAGCCGAAATCAGCTCGTGTTAATTATTTTACATAAGCTTATCTGATAATATAAGAGAATCCTCTCGCCATCC
1301	GCCTAATTACAAGTATTAAATGCTATATATTCTGCTCTGCTTCATGACAT	CCACAAAGGGCCGAGTTAAG	AGAGAATCCTCTCGCCATCC	CCACAAAGGGCCGAGTTAAGGCCTAATTACAAGTATTAAATGCTATATATTCTGCTCTGCTTCATGACATAGAGAATCCTCTCGCCATCC
1302	ACATTATGATTCTTAGGTGTCATTATTTTAATAGTATTTTGAGTCTTCCC	CCACAAAGGGCCGAGTTAAG	AGAGAATCCTCTCGCCATCC	CCACAAAGGGCCGAGTTAAGACATTATGATTCTTAGGTGTCATTATTTTAATAGTATTTTGAGTCTTCCCAGAGAATCCTCTCGCCATCC
1303	GAAGAAGCCAGCCCAGATATCATGACCAAATGCTAAGACTAAAACTACAG	CCACAAAGGGCCGAGTTAAG	AGAGAATCCTCTCGCCATCC	CCACAAAGGGCCGAGTTAAGGAAGAAGCCAGCCCAGATATCATGACCAAATGCTAAGACTAAAACTACAGAGAGAATCCTCTCGCCATCC
1304	CTCATTTTCACCACTTTCTAAATTCTAATCGTAGTTTTCACTTTCCATGG	CCACAAAGGGCCGAGTTAAG	AGAGAATCCTCTCGCCATCC	CCACAAAGGGCCGAGTTAAGCTCATTTTCACCACTTTCTAAATTCTAATCGTAGTTTTCACTTTCCATGGAGAGAATCCTCTCGCCATCC
1305	GATATGTTCTCGTCTCCTGAAAATATAAGCTTATTCTAGAAGGAAGGAAG	CCACAAAGGGCCGAGTTAAG	AGAGAATCCTCTCGCCATCC	CCACAAAGGGCCGAGTTAAGGATATGTTCTCGTCTCCTGAAAATATAAGCTTATTCTAGAAGGAAGGAAGAGAGAATCCTCTCGCCATCC
1306	ATGACACTTATCTTTAATCTCAAAATCAACAATATATTTAATTCATGATA	CCACAAAGGGCCGAGTTAAG	AGAGAATCCTCTCGCCATCC	CCACAAAGGGCCGAGTTAAGATGACACTTATCTTTAATCTCAAAATCAACAATATATTTAATTCATGATAAGAGAATCCTCTCGCCATCC
1307	TGTTTATGTTCATGGCTTGTAATGAGAGTTTTGTCCATTTCCAGAAGAAA	CCACAAAGGGCCGAGTTAAG	AGAGAATCCTCTCGCCATCC	CCACAAAGGGCCGAGTTAAGTGTTTATGTTCATGGCTTGTAATGAGAGTTTTGTCCATTTCCAGAAGAAAAGAGAATCCTCTCGCCATCC
1308	TTAATGCAAGAAAAGTCCGATCAAAATAATGCATGTTCAGTCACATTGAT	CCACAAAGGGCCGAGTTAAG	AGAGAATCCTCTCGCCATCC	CCACAAAGGGCCGAGTTAAGTTAATGCAAGAAAAGTCCGATCAAAATAATGCATGTTCAGTCACATTGATAGAGAATCCTCTCGCCATCC
1309	TGTTTTAGCAAGCATTTGTTTTGGGATTCCACTGCTGATATTTATATATA	CCACAAAGGGCCGAGTTAAG	AGAGAATCCTCTCGCCATCC	CCACAAAGGGCCGAGTTAAGTGTTTTAGCAAGCATTTGTTTTGGGATTCCACTGCTGATATTTATATATAAGAGAATCCTCTCGCCATCC
1310	AAGTATACAATGAGAAGGATCACATGTTCTACTGGAACTGCAAGTATTAT	CCACAAAGGGCCGAGTTAAG	AGAGAATCCTCTCGCCATCC	CCACAAAGGGCCGAGTTAAGAAGTATACAATGAGAAGGATCACATGTTCTACTGGAACTGCAAGTATTATAGAGAATCCTCTCGCCATCC
1311	AATATATATAATTTATCGGACATAAATATACTAGAACTAAACTTACCAAT	CCACAAAGGGCCGAGTTAAG	AGAGAATCCTCTCGCCATCC	CCACAAAGGGCCGAGTTAAGAATATATATAATTTATCGGACATAAATATACTAGAACTAAACTTACCAATAGAGAATCCTCTCGCCATCC
1312	GAAATTAGAAGAATTGAGCTACTGACTATGAAGATGAGTGAGGAATTTCT	CCACAAAGGGCCGAGTTAAG	AGAGAATCCTCTCGCCATCC	CCACAAAGGGCCGAGTTAAGGAAATTAGAAGAATTGAGCTACTGACTATGAAGATGAGTGAGGAATTTCTAGAGAATCCTCTCGCCATCC
1313	AACAATATTATCATTGATGGATTGAGATTCAGTTTGTTCTCTTGATGGAG	CCACAAAGGGCCGAGTTAAG	AGAGAATCCTCTCGCCATCC	CCACAAAGGGCCGAGTTAAGAACAATATTATCATTGATGGATTGAGATTCAGTTTGTTCTCTTGATGGAGAGAGAATCCTCTCGCCATCC
1314	CAATGTTCCACTATGGGTTAACTTCACCGGGTTCCACTGTCCCTTCTCTA	CCACAAAGGGCCGAGTTAAG	AGAGAATCCTCTCGCCATCC	CCACAAAGGGCCGAGTTAAGCAATGTTCCACTATGGGTTAACTTCACCGGGTTCCACTGTCCCTTCTCTAAGAGAATCCTCTCGCCATCC
1315	AAACAGGAAGAGGAGCTTTGGCGGCAGAAATTGAGGATTACTTGGCTTAA	CCACAAAGGGCCGAGTTAAG	AGAGAATCCTCTCGCCATCC	CCACAAAGGGCCGAGTTAAGAAACAGGAAGAGGAGCTTTGGCGGCAGAAATTGAGGATTACTTGGCTTAAAGAGAATCCTCTCGCCATCC
1316	ACATTGCGATTCCAATAATCAACCACCTCTCTAAATTTGTCCATGCTCAG	CCACAAAGGGCCGAGTTAAG	AGAGAATCCTCTCGCCATCC	CCACAAAGGGCCGAGTTAAGACATTGCGATTCCAATAATCAACCACCTCTCTAAATTTGTCCATGCTCAGAGAGAATCCTCTCGCCATCC
1317	TATTGAAATTCCTTTGGAAAAGAAGACTAAGACTGTTGAAGTGGGCCTAG	CCACAAAGGGCCGAGTTAAG	AGAGAATCCTCTCGCCATCC	CCACAAAGGGCCGAGTTAAGTATTGAAATTCCTTTGGAAAAGAAGACTAAGACTGTTGAAGTGGGCCTAGAGAGAATCCTCTCGCCATCC
1318	TTTTAATGCTACTAAAGGCTTGGCTGAGAGGTACTTCAAATATAACTGGA	CCACAAAGGGCCGAGTTAAG	AGAGAATCCTCTCGCCATCC	CCACAAAGGGCCGAGTTAAGTTTTAATGCTACTAAAGGCTTGGCTGAGAGGTACTTCAAATATAACTGGAAGAGAATCCTCTCGCCATCC
1319	CCCTTCCTTTATATAGATATTCTCAAAGTCACAAAGAGTTCTAGAGTCCT	CCACAAAGGGCCGAGTTAAG	AGAGAATCCTCTCGCCATCC	CCACAAAGGGCCGAGTTAAGCCCTTCCTTTATATAGATATTCTCAAAGTCACAAAGAGTTCTAGAGTCCTAGAGAATCCTCTCGCCATCC
1320	TAAATGTTTAAGTGCCCGGGCTGTATTTATTAAGCTTATCCTATCTTATA	CCACAAAGGGCCGAGTTAAG	AGAGAATCCTCTCGCCATCC	CCACAAAGGGCCGAGTTAAGTAAATGTTTAAGTGCCCGGGCTGTATTTATTAAGCTTATCCTATCTTATAAGAGAATCCTCTCGCCATCC
1321	CAGTTTTCGAGGCGTGGAACAGACTTATAGAATTGATTAGGCTATGTCCA	CCACAAAGGGCCGAGTTAAG	AGAGAATCCTCTCGCCATCC	CCACAAAGGGCCGAGTTAAGCAGTTTTCGAGGCGTGGAACAGACTTATAGAATTGATTAGGCTATGTCCAAGAGAATCCTCTCGCCATCC
1322	ATACTCGAGAATTTTAGCAGTTAAATAGTACTCCGCAAGAAAAGCTTTGC	CCACAAAGGGCCGAGTTAAG	AGAGAATCCTCTCGCCATCC	CCACAAAGGGCCGAGTTAAGATACTCGAGAATTTTAGCAGTTAAATAGTACTCCGCAAGAAAAGCTTTGCAGAGAATCCTCTCGCCATCC
1323	TACAAATCAAAGAAAATTAAGAGAAAGCAAGAACAAAGACTAAAACTAGC	CCACAAAGGGCCGAGTTAAG	AGAGAATCCTCTCGCCATCC	CCACAAAGGGCCGAGTTAAGTACAAATCAAAGAAAATTAAGAGAAAGCAAGAACAAAGACTAAAACTAGCAGAGAATCCTCTCGCCATCC
1324	TTGAGTTCAAAATCGATTTCCTTAAAATGATTGAGTTATTAAGTTCTTAA	CCACAAAGGGCCGAGTTAAG	AGAGAATCCTCTCGCCATCC	CCACAAAGGGCCGAGTTAAGTTGAGTTCAAAATCGATTTCCTTAAAATGATTGAGTTATTAAGTTCTTAAAGAGAATCCTCTCGCCATCC
1325	TTAGATAGATACAAGTTTATGTCAAATTTAAGGCATTTCTGAATATTCCA	CCACAAAGGGCCGAGTTAAG	AGAGAATCCTCTCGCCATCC	CCACAAAGGGCCGAGTTAAGTTAGATAGATACAAGTTTATGTCAAATTTAAGGCATTTCTGAATATTCCAAGAGAATCCTCTCGCCATCC
1326	CACATTCAAGAAACTGAAGCTAAAGTTGAAAGATATTTGAAGGATATCAA	CCACAAAGGGCCGAGTTAAG	AGAGAATCCTCTCGCCATCC	CCACAAAGGGCCGAGTTAAGCACATTCAAGAAACTGAAGCTAAAGTTGAAAGATATTTGAAGGATATCAAAGAGAATCCTCTCGCCATCC
1327	GTCACTGAATTTTCAACCAAGGGCGATGACAAATTATAAGAATCAACGAT	CCACAAAGGGCCGAGTTAAG	AGAGAATCCTCTCGCCATCC	CCACAAAGGGCCGAGTTAAGGTCACTGAATTTTCAACCAAGGGCGATGACAAATTATAAGAATCAACGATAGAGAATCCTCTCGCCATCC
1328	AGTTACGTGTGTTGGATAATGACTGAATACCTCTAAATCTGAATTCAAGC	CCACAAAGGGCCGAGTTAAG	AGAGAATCCTCTCGCCATCC	CCACAAAGGGCCGAGTTAAGAGTTACGTGTGTTGGATAATGACTGAATACCTCTAAATCTGAATTCAAGCAGAGAATCCTCTCGCCATCC
1329	ATTTTATGTGGGTGGTTTGTTTTATTACTATGAATAATGTTTATTAATTC	CCACAAAGGGCCGAGTTAAG	AGAGAATCCTCTCGCCATCC	CCACAAAGGGCCGAGTTAAGATTTTATGTGGGTGGTTTGTTTTATTACTATGAATAATGTTTATTAATTCAGAGAATCCTCTCGCCATCC
1330	GTTTTCGCTGAAATGTACATATCTCATTAACAAATAAAAGTTTAATGACT	CCACAAAGGGCCGAGTTAAG	AGAGAATCCTCTCGCCATCC	CCACAAAGGGCCGAGTTAAGGTTTTCGCTGAAATGTACATATCTCATTAACAAATAAAAGTTTAATGACTAGAGAATCCTCTCGCCATCC
1331	ATTGCCAATCCAAGAAGGTATACTGCCATTCAAATGATTCCATGACAAGT	CCACAAAGGGCCGAGTTAAG	AGAGAATCCTCTCGCCATCC	CCACAAAGGGCCGAGTTAAGATTGCCAATCCAAGAAGGTATACTGCCATTCAAATGATTCCATGACAAGTAGAGAATCCTCTCGCCATCC
1332	TGGATCTTTGTCTAGACATTTACAAGCTATATGAAGAACCTCTAAGAGCT	CCACAAAGGGCCGAGTTAAG	AGAGAATCCTCTCGCCATCC	CCACAAAGGGCCGAGTTAAGTGGATCTTTGTCTAGACATTTACAAGCTATATGAAGAACCTCTAAGAGCTAGAGAATCCTCTCGCCATCC
1333	ACTTTAGCATCCCATTTTCTTGATTCTTTTAATTTATCAATCCCACTAAA	CCACAAAGGGCCGAGTTAAG	AGAGAATCCTCTCGCCATCC	CCACAAAGGGCCGAGTTAAGACTTTAGCATCCCATTTTCTTGATTCTTTTAATTTATCAATCCCACTAAAAGAGAATCCTCTCGCCATCC
1334	GACGTTTAAAATGTAGAATAATGAGGCGGTACGTACGTGGTGGACAATCG	CCACAAAGGGCCGAGTTAAG	AGAGAATCCTCTCGCCATCC	CCACAAAGGGCCGAGTTAAGGACGTTTAAAATGTAGAATAATGAGGCGGTACGTACGTGGTGGACAATCGAGAGAATCCTCTCGCCATCC
1335	CAATTGTCATTTAGTCAGGAAATTGGGTGGATGATATAAGGAAAGGGGCA	CCACAAAGGGCCGAGTTAAG	AGAGAATCCTCTCGCCATCC	CCACAAAGGGCCGAGTTAAGCAATTGTCATTTAGTCAGGAAATTGGGTGGATGATATAAGGAAAGGGGCAAGAGAATCCTCTCGCCATCC
1336	CTCCTCCATGAGCACCTCCCTCCTTCCCTCCTTCCTTCTATTGCCAGAAA	CCACAAAGGGCCGAGTTAAG	AGAGAATCCTCTCGCCATCC	CCACAAAGGGCCGAGTTAAGCTCCTCCATGAGCACCTCCCTCCTTCCCTCCTTCCTTCTATTGCCAGAAAAGAGAATCCTCTCGCCATCC
1337	GTTGTGGACATGGCTATCAATGTTATCATGATCATCAGAGAGACTCACCG	CCACAAAGGGCCGAGTTAAG	AGAGAATCCTCTCGCCATCC	CCACAAAGGGCCGAGTTAAGGTTGTGGACATGGCTATCAATGTTATCATGATCATCAGAGAGACTCACCGAGAGAATCCTCTCGCCATCC
1338	ATTGACTCCTTTCTTACACCTCAGCAACCTGTAGTTTTAGTATTTCCAAT	CCACAAAGGGCCGAGTTAAG	AGAGAATCCTCTCGCCATCC	CCACAAAGGGCCGAGTTAAGATTGACTCCTTTCTTACACCTCAGCAACCTGTAGTTTTAGTATTTCCAATAGAGAATCCTCTCGCCATCC
1339	TTTCAACCTAATGCTGGACACAAGAGACCTAAACCTGGTGCTAATTACTT	CCACAAAGGGCCGAGTTAAG	AGAGAATCCTCTCGCCATCC	CCACAAAGGGCCGAGTTAAGTTTCAACCTAATGCTGGACACAAGAGACCTAAACCTGGTGCTAATTACTTAGAGAATCCTCTCGCCATCC
1340	TATCAAGATCAGGGGAAGGAGAAACAGAATCAGAAGAAGGTGTGTCATGT	CCACAAAGGGCCGAGTTAAG	AGAGAATCCTCTCGCCATCC	CCACAAAGGGCCGAGTTAAGTATCAAGATCAGGGGAAGGAGAAACAGAATCAGAAGAAGGTGTGTCATGTAGAGAATCCTCTCGCCATCC
1341	TGCGAAGGGAATTGGGAATGCTGAGATCAATTACTAAAGACATATTATTG	CCACAAAGGGCCGAGTTAAG	AGAGAATCCTCTCGCCATCC	CCACAAAGGGCCGAGTTAAGTGCGAAGGGAATTGGGAATGCTGAGATCAATTACTAAAGACATATTATTGAGAGAATCCTCTCGCCATCC
1342	TCTTTCTTCTTAATCACTTTCGATTATAACTAACTCAAAATTCAGATTTT	CCACAAAGGGCCGAGTTAAG	AGAGAATCCTCTCGCCATCC	CCACAAAGGGCCGAGTTAAGTCTTTCTTCTTAATCACTTTCGATTATAACTAACTCAAAATTCAGATTTTAGAGAATCCTCTCGCCATCC
1343	AATATATTCACATTTATAAGTCGGTACCACAATTATAAATCTAAATACTT	CCACAAAGGGCCGAGTTAAG	AGAGAATCCTCTCGCCATCC	CCACAAAGGGCCGAGTTAAGAATATATTCACATTTATAAGTCGGTACCACAATTATAAATCTAAATACTTAGAGAATCCTCTCGCCATCC
1344	TGTTTAATATTGTCGAGGCTATTAATATTAGACACAATTAGGATTCCAAT	CCACAAAGGGCCGAGTTAAG	AGAGAATCCTCTCGCCATCC	CCACAAAGGGCCGAGTTAAGTGTTTAATATTGTCGAGGCTATTAATATTAGACACAATTAGGATTCCAATAGAGAATCCTCTCGCCATCC
1345	TGATTTCCAAATAATAACAAAACACATATAAATTCTATGGCGCCCACTGC	CCACAAAGGGCCGAGTTAAG	AGAGAATCCTCTCGCCATCC	CCACAAAGGGCCGAGTTAAGTGATTTCCAAATAATAACAAAACACATATAAATTCTATGGCGCCCACTGCAGAGAATCCTCTCGCCATCC
1346	CAATAAGTATTGCTGTTACTGCTGTTGAACCACCTTTGCCCATATCAACT	CCACAAAGGGCCGAGTTAAG	AGAGAATCCTCTCGCCATCC	CCACAAAGGGCCGAGTTAAGCAATAAGTATTGCTGTTACTGCTGTTGAACCACCTTTGCCCATATCAACTAGAGAATCCTCTCGCCATCC
1347	AATGTAAAGTGTATAATCAATTCATAAAGTTGACAACAGTATTCTATAAC	CCACAAAGGGCCGAGTTAAG	AGAGAATCCTCTCGCCATCC	CCACAAAGGGCCGAGTTAAGAATGTAAAGTGTATAATCAATTCATAAAGTTGACAACAGTATTCTATAACAGAGAATCCTCTCGCCATCC
1348	ATCATCTACTCTAAACTTATGCAGACAGGTTAAATTTATTTTAAGAGAAA	CCACAAAGGGCCGAGTTAAG	AGAGAATCCTCTCGCCATCC	CCACAAAGGGCCGAGTTAAGATCATCTACTCTAAACTTATGCAGACAGGTTAAATTTATTTTAAGAGAAAAGAGAATCCTCTCGCCATCC
1349	AAGATAAGCACCACATAATTCTTGAGCATACCGTCCATCTTGCATTTCAA	CCACAAAGGGCCGAGTTAAG	AGAGAATCCTCTCGCCATCC	CCACAAAGGGCCGAGTTAAGAAGATAAGCACCACATAATTCTTGAGCATACCGTCCATCTTGCATTTCAAAGAGAATCCTCTCGCCATCC
1350	TTGTCAATCTTTCAGTTAATTCCCAGCAATTCTCCCTTCTTTCTCTTTGT	CCACAAAGGGCCGAGTTAAG	AGAGAATCCTCTCGCCATCC	CCACAAAGGGCCGAGTTAAGTTGTCAATCTTTCAGTTAATTCCCAGCAATTCTCCCTTCTTTCTCTTTGTAGAGAATCCTCTCGCCATCC
1351	TAATGATAGCCGACTCCGAGGTGAACTAATACACATTACTGATTAAATTG	CCACAAAGGGCCGAGTTAAG	AGAGAATCCTCTCGCCATCC	CCACAAAGGGCCGAGTTAAGTAATGATAGCCGACTCCGAGGTGAACTAATACACATTACTGATTAAATTGAGAGAATCCTCTCGCCATCC
1352	ATTAAGCAACTTTTCTTGTATAATTATGTTTCTACACAACACTAAAATTA	CCACAAAGGGCCGAGTTAAG	AGAGAATCCTCTCGCCATCC	CCACAAAGGGCCGAGTTAAGATTAAGCAACTTTTCTTGTATAATTATGTTTCTACACAACACTAAAATTAAGAGAATCCTCTCGCCATCC
1353	CCCACTACGACTGTAAACACATTTTCTTCTTTCTCAAGATCGACCAGCGT	CCACAAAGGGCCGAGTTAAG	AGAGAATCCTCTCGCCATCC	CCACAAAGGGCCGAGTTAAGCCCACTACGACTGTAAACACATTTTCTTCTTTCTCAAGATCGACCAGCGTAGAGAATCCTCTCGCCATCC
1354	CAATTGAGTCTGTTTTACGAGTGGTCCAAGGAGTGTCATGGGAATTTGTG	CCACAAAGGGCCGAGTTAAG	AGAGAATCCTCTCGCCATCC	CCACAAAGGGCCGAGTTAAGCAATTGAGTCTGTTTTACGAGTGGTCCAAGGAGTGTCATGGGAATTTGTGAGAGAATCCTCTCGCCATCC
1355	CAGAGTCAACACCTCTTGCTCATCTACGAAGTAAGCACAAAGGGTCGGAA	CCACAAAGGGCCGAGTTAAG	AGAGAATCCTCTCGCCATCC	CCACAAAGGGCCGAGTTAAGCAGAGTCAACACCTCTTGCTCATCTACGAAGTAAGCACAAAGGGTCGGAAAGAGAATCCTCTCGCCATCC
1356	ACACGCACGCGAGAATGTTTCTTAGCTGATCTTTAATATGCTCTATGGCA	CCACAAAGGGCCGAGTTAAG	AGAGAATCCTCTCGCCATCC	CCACAAAGGGCCGAGTTAAGACACGCACGCGAGAATGTTTCTTAGCTGATCTTTAATATGCTCTATGGCAAGAGAATCCTCTCGCCATCC
1357	GAATGACCCTCTAGAAGATAGATGAATGTTTAGAGAGAATGTAATGAGAA	CCACAAAGGGCCGAGTTAAG	AGAGAATCCTCTCGCCATCC	CCACAAAGGGCCGAGTTAAGGAATGACCCTCTAGAAGATAGATGAATGTTTAGAGAGAATGTAATGAGAAAGAGAATCCTCTCGCCATCC
1358	TATATAGTACTCAGCAATCAGAAATAGAAATGTAGTACGAAGAAGAGGCC	CCACAAAGGGCCGAGTTAAG	AGAGAATCCTCTCGCCATCC	CCACAAAGGGCCGAGTTAAGTATATAGTACTCAGCAATCAGAAATAGAAATGTAGTACGAAGAAGAGGCCAGAGAATCCTCTCGCCATCC
1359	ATTTTAATCAAATTCACGTTTAAATTAATCCTCATTCGAACCGAATTAAT	CCACAAAGGGCCGAGTTAAG	AGAGAATCCTCTCGCCATCC	CCACAAAGGGCCGAGTTAAGATTTTAATCAAATTCACGTTTAAATTAATCCTCATTCGAACCGAATTAATAGAGAATCCTCTCGCCATCC
1360	AATCCAGCAGGTTAGGGGATAGGGGTGGGGTTGTATGAGATGGGATTTAA	CCACAAAGGGCCGAGTTAAG	AGAGAATCCTCTCGCCATCC	CCACAAAGGGCCGAGTTAAGAATCCAGCAGGTTAGGGGATAGGGGTGGGGTTGTATGAGATGGGATTTAAAGAGAATCCTCTCGCCATCC
1361	GCAGAAGGCCATGACCAGCTTGTATGACGGCAATAGTCTGCAGCAGATCA	CCACAAAGGGCCGAGTTAAG	AGAGAATCCTCTCGCCATCC	CCACAAAGGGCCGAGTTAAGGCAGAAGGCCATGACCAGCTTGTATGACGGCAATAGTCTGCAGCAGATCAAGAGAATCCTCTCGCCATCC
1362	TTCAGTTGTATAATTATGGAGAAGGGTGGGTACTTGGTAGGTGGTGCTTT	CCACAAAGGGCCGAGTTAAG	AGAGAATCCTCTCGCCATCC	CCACAAAGGGCCGAGTTAAGTTCAGTTGTATAATTATGGAGAAGGGTGGGTACTTGGTAGGTGGTGCTTTAGAGAATCCTCTCGCCATCC
1363	TGAATCTCACCATTCTAAGAAGGATATATACTATTCAATACATAAATGTT	CCACAAAGGGCCGAGTTAAG	AGAGAATCCTCTCGCCATCC	CCACAAAGGGCCGAGTTAAGTGAATCTCACCATTCTAAGAAGGATATATACTATTCAATACATAAATGTTAGAGAATCCTCTCGCCATCC
1364	TATAAAATTAGTTAAAATCCAACCTCTTCAGTCTATGTCTTCAATGCTTT	CCACAAAGGGCCGAGTTAAG	AGAGAATCCTCTCGCCATCC	CCACAAAGGGCCGAGTTAAGTATAAAATTAGTTAAAATCCAACCTCTTCAGTCTATGTCTTCAATGCTTTAGAGAATCCTCTCGCCATCC
1365	GGACATTCAAAAGATGAGCTTTATAAAATCTATTGATTATGTAAATAACT	CCACAAAGGGCCGAGTTAAG	AGAGAATCCTCTCGCCATCC	CCACAAAGGGCCGAGTTAAGGGACATTCAAAAGATGAGCTTTATAAAATCTATTGATTATGTAAATAACTAGAGAATCCTCTCGCCATCC
1366	TCAAATTTTGACTCCTATAATTTTAAGTTGATCCAAATTCCATAAAGATA	CCACAAAGGGCCGAGTTAAG	AGAGAATCCTCTCGCCATCC	CCACAAAGGGCCGAGTTAAGTCAAATTTTGACTCCTATAATTTTAAGTTGATCCAAATTCCATAAAGATAAGAGAATCCTCTCGCCATCC
1367	TCTCGGGAATTAAACAATCTAAAATTCGAGAAGTAAAACCAACAACAATT	CCACAAAGGGCCGAGTTAAG	AGAGAATCCTCTCGCCATCC	CCACAAAGGGCCGAGTTAAGTCTCGGGAATTAAACAATCTAAAATTCGAGAAGTAAAACCAACAACAATTAGAGAATCCTCTCGCCATCC
1368	ATTTCTGAAAAGTTTGACACGCACTTAGACAGCTACTACGGCCATGATGA	CCACAAAGGGCCGAGTTAAG	AGAGAATCCTCTCGCCATCC	CCACAAAGGGCCGAGTTAAGATTTCTGAAAAGTTTGACACGCACTTAGACAGCTACTACGGCCATGATGAAGAGAATCCTCTCGCCATCC
1369	CTACTCAATTCAAAGTGGAAATTTTCAGATAATTGTAAATTTGGTCCATA	CCACAAAGGGCCGAGTTAAG	AGAGAATCCTCTCGCCATCC	CCACAAAGGGCCGAGTTAAGCTACTCAATTCAAAGTGGAAATTTTCAGATAATTGTAAATTTGGTCCATAAGAGAATCCTCTCGCCATCC
1370	GACTTCATATAGAGGAAAACAAAGTCAAGGGCTTAACCAATCGGGAAAAC	CCACAAAGGGCCGAGTTAAG	AGAGAATCCTCTCGCCATCC	CCACAAAGGGCCGAGTTAAGGACTTCATATAGAGGAAAACAAAGTCAAGGGCTTAACCAATCGGGAAAACAGAGAATCCTCTCGCCATCC
1371	TCTATTGTTAAGGTGAAAGCATACTATAGATTTTATTGAGCGTATTCCTC	CCACAAAGGGCCGAGTTAAG	AGAGAATCCTCTCGCCATCC	CCACAAAGGGCCGAGTTAAGTCTATTGTTAAGGTGAAAGCATACTATAGATTTTATTGAGCGTATTCCTCAGAGAATCCTCTCGCCATCC
1372	AATGACCACTCCATTTTGGGTAAGAAGAGGAAGAGGTGTCTTGTCCAAGT	CCACAAAGGGCCGAGTTAAG	AGAGAATCCTCTCGCCATCC	CCACAAAGGGCCGAGTTAAGAATGACCACTCCATTTTGGGTAAGAAGAGGAAGAGGTGTCTTGTCCAAGTAGAGAATCCTCTCGCCATCC
1373	CAGGTTGGTCCCTTGCGTATATGAGTTAATGTTCAAACCATCTACTTCAC	CCACAAAGGGCCGAGTTAAG	AGAGAATCCTCTCGCCATCC	CCACAAAGGGCCGAGTTAAGCAGGTTGGTCCCTTGCGTATATGAGTTAATGTTCAAACCATCTACTTCACAGAGAATCCTCTCGCCATCC
1374	TTTTGTTTTCCCACTTAATTAGCTGTTACGACATTAATTTACATTTTATA	CCACAAAGGGCCGAGTTAAG	AGAGAATCCTCTCGCCATCC	CCACAAAGGGCCGAGTTAAGTTTTGTTTTCCCACTTAATTAGCTGTTACGACATTAATTTACATTTTATAAGAGAATCCTCTCGCCATCC
1375	TCCTAAGAAACACATGAACAACTAAATACATGCATTCTCAGAACATTTTA	CCACAAAGGGCCGAGTTAAG	AGAGAATCCTCTCGCCATCC	CCACAAAGGGCCGAGTTAAGTCCTAAGAAACACATGAACAACTAAATACATGCATTCTCAGAACATTTTAAGAGAATCCTCTCGCCATCC
1376	CAATATATCTTTCATCCCTAACTACTAGCAGTCTTGAAATCAACCGAATT	CCACAAAGGGCCGAGTTAAG	AGAGAATCCTCTCGCCATCC	CCACAAAGGGCCGAGTTAAGCAATATATCTTTCATCCCTAACTACTAGCAGTCTTGAAATCAACCGAATTAGAGAATCCTCTCGCCATCC
1377	TAAGTTGTTCATGCTCTTGGTCAATGAAAATATCAAACAACTCATCATAG	CCACAAAGGGCCGAGTTAAG	AGAGAATCCTCTCGCCATCC	CCACAAAGGGCCGAGTTAAGTAAGTTGTTCATGCTCTTGGTCAATGAAAATATCAAACAACTCATCATAGAGAGAATCCTCTCGCCATCC
1378	CCCCAATTTTGAACTAGGAATGAGGTTTGCTAATTAATGGTGCTAAATTC	CCACAAAGGGCCGAGTTAAG	AGAGAATCCTCTCGCCATCC	CCACAAAGGGCCGAGTTAAGCCCCAATTTTGAACTAGGAATGAGGTTTGCTAATTAATGGTGCTAAATTCAGAGAATCCTCTCGCCATCC
1379	TTAAAGCACACAATTTCTCTCTTCACACATATAACCCTACAACACCCAAT	CCACAAAGGGCCGAGTTAAG	AGAGAATCCTCTCGCCATCC	CCACAAAGGGCCGAGTTAAGTTAAAGCACACAATTTCTCTCTTCACACATATAACCCTACAACACCCAATAGAGAATCCTCTCGCCATCC
1380	GGTTTATGAGACCGAATCAAGGCCTTTAAATCATGAATTACCTGGGGAGA	CCACAAAGGGCCGAGTTAAG	AGAGAATCCTCTCGCCATCC	CCACAAAGGGCCGAGTTAAGGGTTTATGAGACCGAATCAAGGCCTTTAAATCATGAATTACCTGGGGAGAAGAGAATCCTCTCGCCATCC
1381	CAACCATCTCCCATGTTGCTTCTTCCACTGGACATTCTTCCGATTACACC	CCACAAAGGGCCGAGTTAAG	AGAGAATCCTCTCGCCATCC	CCACAAAGGGCCGAGTTAAGCAACCATCTCCCATGTTGCTTCTTCCACTGGACATTCTTCCGATTACACCAGAGAATCCTCTCGCCATCC
1382	TAGCGCCTAGGAACCAAGCTCAACGAATTACATCAATGGAAGGAAGGATT	CCACAAAGGGCCGAGTTAAG	AGAGAATCCTCTCGCCATCC	CCACAAAGGGCCGAGTTAAGTAGCGCCTAGGAACCAAGCTCAACGAATTACATCAATGGAAGGAAGGATTAGAGAATCCTCTCGCCATCC
1383	CTAAAACTTAATTATTTAATGAAGAATTGATCACTTTAGTTTAATCAAAA	CCACAAAGGGCCGAGTTAAG	AGAGAATCCTCTCGCCATCC	CCACAAAGGGCCGAGTTAAGCTAAAACTTAATTATTTAATGAAGAATTGATCACTTTAGTTTAATCAAAAAGAGAATCCTCTCGCCATCC
1384	GAGAAGGTCTAGATTAAAAGGTTGAGCAGATAGTTTTCCAGATATTCACA	CCACAAAGGGCCGAGTTAAG	AGAGAATCCTCTCGCCATCC	CCACAAAGGGCCGAGTTAAGGAGAAGGTCTAGATTAAAAGGTTGAGCAGATAGTTTTCCAGATATTCACAAGAGAATCCTCTCGCCATCC
1385	CTTTCCATATTTATGCATGTGTGTTCTGTTGTTTTGAGACATTAACTCTT	CCACAAAGGGCCGAGTTAAG	AGAGAATCCTCTCGCCATCC	CCACAAAGGGCCGAGTTAAGCTTTCCATATTTATGCATGTGTGTTCTGTTGTTTTGAGACATTAACTCTTAGAGAATCCTCTCGCCATCC
1386	TTTTAAGACTTTATGGATTCTTAGGAGGTCCCAAATAATTTGTATATCAA	CCACAAAGGGCCGAGTTAAG	AGAGAATCCTCTCGCCATCC	CCACAAAGGGCCGAGTTAAGTTTTAAGACTTTATGGATTCTTAGGAGGTCCCAAATAATTTGTATATCAAAGAGAATCCTCTCGCCATCC
1387	CTTGAAAGATATTCTTACCATAAAGAGAACAAATAAATAAAACACAGATT	CCACAAAGGGCCGAGTTAAG	AGAGAATCCTCTCGCCATCC	CCACAAAGGGCCGAGTTAAGCTTGAAAGATATTCTTACCATAAAGAGAACAAATAAATAAAACACAGATTAGAGAATCCTCTCGCCATCC
1388	GAAACCAAGGACAACCACACTTGACATACTTCAATTTCATAAGGTATGTG	CCACAAAGGGCCGAGTTAAG	AGAGAATCCTCTCGCCATCC	CCACAAAGGGCCGAGTTAAGGAAACCAAGGACAACCACACTTGACATACTTCAATTTCATAAGGTATGTGAGAGAATCCTCTCGCCATCC
1389	TGTTTTCCTTCTAATTGAAACTGGGAGGAAGCTTGTATTTGTGGTTTGAT	CCACAAAGGGCCGAGTTAAG	AGAGAATCCTCTCGCCATCC	CCACAAAGGGCCGAGTTAAGTGTTTTCCTTCTAATTGAAACTGGGAGGAAGCTTGTATTTGTGGTTTGATAGAGAATCCTCTCGCCATCC
1390	AGATTATTCAGAATTCAAACATCTATTCCTCTCATCCACTTTAGTATATT	CCACAAAGGGCCGAGTTAAG	AGAGAATCCTCTCGCCATCC	CCACAAAGGGCCGAGTTAAGAGATTATTCAGAATTCAAACATCTATTCCTCTCATCCACTTTAGTATATTAGAGAATCCTCTCGCCATCC
1391	TCATGTAACATATAGAAGCATAAGTATGTCTGTGCATGTTATTTTGGTCA	CCACAAAGGGCCGAGTTAAG	AGAGAATCCTCTCGCCATCC	CCACAAAGGGCCGAGTTAAGTCATGTAACATATAGAAGCATAAGTATGTCTGTGCATGTTATTTTGGTCAAGAGAATCCTCTCGCCATCC
1392	CTGTTATTTGATTTATCTTCTACAGGGAGGATGAAATTGACGACATTCAG	CCACAAAGGGCCGAGTTAAG	AGAGAATCCTCTCGCCATCC	CCACAAAGGGCCGAGTTAAGCTGTTATTTGATTTATCTTCTACAGGGAGGATGAAATTGACGACATTCAGAGAGAATCCTCTCGCCATCC
1393	GTGAGAGTTGGACTAGATGAGATGAGATTATGAGTTTAGACATAGTGGAG	CCACAAAGGGCCGAGTTAAG	AGAGAATCCTCTCGCCATCC	CCACAAAGGGCCGAGTTAAGGTGAGAGTTGGACTAGATGAGATGAGATTATGAGTTTAGACATAGTGGAGAGAGAATCCTCTCGCCATCC
1394	ACAGAGACTCTCAACATATTTCCCTAAAATCTCAAAACATAAACAAGCAT	CCACAAAGGGCCGAGTTAAG	AGAGAATCCTCTCGCCATCC	CCACAAAGGGCCGAGTTAAGACAGAGACTCTCAACATATTTCCCTAAAATCTCAAAACATAAACAAGCATAGAGAATCCTCTCGCCATCC
1395	GTAGGTTCAAGTTCCTTCAAGCTCACTTTCCTTAGTGTTCATAATGTTGC	CCACAAAGGGCCGAGTTAAG	AGAGAATCCTCTCGCCATCC	CCACAAAGGGCCGAGTTAAGGTAGGTTCAAGTTCCTTCAAGCTCACTTTCCTTAGTGTTCATAATGTTGCAGAGAATCCTCTCGCCATCC
1396	ACACATAACTTCCAACCATGATACTTGAAAATAAGATTTCTTAACTAACA	CCACAAAGGGCCGAGTTAAG	AGAGAATCCTCTCGCCATCC	CCACAAAGGGCCGAGTTAAGACACATAACTTCCAACCATGATACTTGAAAATAAGATTTCTTAACTAACAAGAGAATCCTCTCGCCATCC
1397	GTGCTGGTAGATAATGATTTGAAACTGAGTTAATCCTTTCCTTCCGTTTT	CCACAAAGGGCCGAGTTAAG	AGAGAATCCTCTCGCCATCC	CCACAAAGGGCCGAGTTAAGGTGCTGGTAGATAATGATTTGAAACTGAGTTAATCCTTTCCTTCCGTTTTAGAGAATCCTCTCGCCATCC
1398	TGGTTTTCTAATATGTGAAGATATCCTCTGTTATTCTTTCGAGAGTGCAA	CCACAAAGGGCCGAGTTAAG	AGAGAATCCTCTCGCCATCC	CCACAAAGGGCCGAGTTAAGTGGTTTTCTAATATGTGAAGATATCCTCTGTTATTCTTTCGAGAGTGCAAAGAGAATCCTCTCGCCATCC
1399	CAAATTTGTCTTTGCTTTTACTAATTGTATCTATCTGGGTATTCAAGATT	CCACAAAGGGCCGAGTTAAG	AGAGAATCCTCTCGCCATCC	CCACAAAGGGCCGAGTTAAGCAAATTTGTCTTTGCTTTTACTAATTGTATCTATCTGGGTATTCAAGATTAGAGAATCCTCTCGCCATCC
1400	TAAATATTACTTTCATATTTCCTTTGTTTGGGATTCTGCAGTGCCTTTCT	CCACAAAGGGCCGAGTTAAG	AGAGAATCCTCTCGCCATCC	CCACAAAGGGCCGAGTTAAGTAAATATTACTTTCATATTTCCTTTGTTTGGGATTCTGCAGTGCCTTTCTAGAGAATCCTCTCGCCATCC
1401	TCATTTGCGAGTGTCCAACTTGTGATTACTAAATATTATTTAGCTCGTTG	CCACAAAGGGCCGAGTTAAG	AGAGAATCCTCTCGCCATCC	CCACAAAGGGCCGAGTTAAGTCATTTGCGAGTGTCCAACTTGTGATTACTAAATATTATTTAGCTCGTTGAGAGAATCCTCTCGCCATCC
1402	AAGTTAAATAAAGTAATTAAACTGTTATAATCTTTTCCTGGGAGCCCAAT	CCACAAAGGGCCGAGTTAAG	AGAGAATCCTCTCGCCATCC	CCACAAAGGGCCGAGTTAAGAAGTTAAATAAAGTAATTAAACTGTTATAATCTTTTCCTGGGAGCCCAATAGAGAATCCTCTCGCCATCC
1403	TGGAAACAAAAGTTTTGATATAGGAAAAGAAGGAGATAAAGAGGCCATAT	CCACAAAGGGCCGAGTTAAG	AGAGAATCCTCTCGCCATCC	CCACAAAGGGCCGAGTTAAGTGGAAACAAAAGTTTTGATATAGGAAAAGAAGGAGATAAAGAGGCCATATAGAGAATCCTCTCGCCATCC
1404	TTCCACTTCCTGATGTTTGCCTTAAGGTTATTCATGGTTACTTACAAGTT	CCACAAAGGGCCGAGTTAAG	AGAGAATCCTCTCGCCATCC	CCACAAAGGGCCGAGTTAAGTTCCACTTCCTGATGTTTGCCTTAAGGTTATTCATGGTTACTTACAAGTTAGAGAATCCTCTCGCCATCC
1405	CAAGTTGGTCTATCTTGGTATCATATATGAGCAGGTATTACTTTAAAATC	CCACAAAGGGCCGAGTTAAG	AGAGAATCCTCTCGCCATCC	CCACAAAGGGCCGAGTTAAGCAAGTTGGTCTATCTTGGTATCATATATGAGCAGGTATTACTTTAAAATCAGAGAATCCTCTCGCCATCC
1406	CATTTCTGGATTCAAACTGGACTTAATACTTAAAGCTTTTCCCTTGAGAA	CCACAAAGGGCCGAGTTAAG	AGAGAATCCTCTCGCCATCC	CCACAAAGGGCCGAGTTAAGCATTTCTGGATTCAAACTGGACTTAATACTTAAAGCTTTTCCCTTGAGAAAGAGAATCCTCTCGCCATCC
1407	AAAAGGATCCACTCAAAGAAGAGATTGTCCATGATTGTGATGATTATCCA	CCACAAAGGGCCGAGTTAAG	AGAGAATCCTCTCGCCATCC	CCACAAAGGGCCGAGTTAAGAAAAGGATCCACTCAAAGAAGAGATTGTCCATGATTGTGATGATTATCCAAGAGAATCCTCTCGCCATCC
1408	TTATATTGTTGTGTGGTTGTGCTTAGCCTCGGAAGATGAAAAGGGTGAAA	CCACAAAGGGCCGAGTTAAG	AGAGAATCCTCTCGCCATCC	CCACAAAGGGCCGAGTTAAGTTATATTGTTGTGTGGTTGTGCTTAGCCTCGGAAGATGAAAAGGGTGAAAAGAGAATCCTCTCGCCATCC
1409	TTTTCTGAGAGTTAAGCATTGAGTAGAGAGAAAATAGAGAGTGATGAGAG	CCACAAAGGGCCGAGTTAAG	AGAGAATCCTCTCGCCATCC	CCACAAAGGGCCGAGTTAAGTTTTCTGAGAGTTAAGCATTGAGTAGAGAGAAAATAGAGAGTGATGAGAGAGAGAATCCTCTCGCCATCC
1410	TATAATTGTGCTACTTGAAGGGAAGTATATGGATGTGACAACCCCATGAA	CCACAAAGGGCCGAGTTAAG	AGAGAATCCTCTCGCCATCC	CCACAAAGGGCCGAGTTAAGTATAATTGTGCTACTTGAAGGGAAGTATATGGATGTGACAACCCCATGAAAGAGAATCCTCTCGCCATCC
1411	GCAGGACGGAGGAAGGAGCAGAATACGTATTTAGCAACAGGGATGTACCT	CCACAAAGGGCCGAGTTAAG	AGAGAATCCTCTCGCCATCC	CCACAAAGGGCCGAGTTAAGGCAGGACGGAGGAAGGAGCAGAATACGTATTTAGCAACAGGGATGTACCTAGAGAATCCTCTCGCCATCC
1412	GGATGGTTCACGAAAATTTGCTCTCCTTTAATTTAATGATGCTTTTGTTT	CCACAAAGGGCCGAGTTAAG	AGAGAATCCTCTCGCCATCC	CCACAAAGGGCCGAGTTAAGGGATGGTTCACGAAAATTTGCTCTCCTTTAATTTAATGATGCTTTTGTTTAGAGAATCCTCTCGCCATCC
1413	AAAATCCTTCTTGATATTGAATACTTGGTAAATTTCTTCCCAATTGGCGA	CCACAAAGGGCCGAGTTAAG	AGAGAATCCTCTCGCCATCC	CCACAAAGGGCCGAGTTAAGAAAATCCTTCTTGATATTGAATACTTGGTAAATTTCTTCCCAATTGGCGAAGAGAATCCTCTCGCCATCC
1414	GGGAAACCCTGTTCGAAACTATTAAGGCTGCCTCTTACTTGAATATAAAA	CCACAAAGGGCCGAGTTAAG	AGAGAATCCTCTCGCCATCC	CCACAAAGGGCCGAGTTAAGGGGAAACCCTGTTCGAAACTATTAAGGCTGCCTCTTACTTGAATATAAAAAGAGAATCCTCTCGCCATCC
1415	TTGACTTTAGTTTAAGACATTTATATTTGGCAAACTTAATCTTAAAATTT	CCACAAAGGGCCGAGTTAAG	AGAGAATCCTCTCGCCATCC	CCACAAAGGGCCGAGTTAAGTTGACTTTAGTTTAAGACATTTATATTTGGCAAACTTAATCTTAAAATTTAGAGAATCCTCTCGCCATCC
1416	ATTTCCACCAGAACTCTCGAATGATCCGTATTAACTCTTTATCTTCCAAT	CCACAAAGGGCCGAGTTAAG	AGAGAATCCTCTCGCCATCC	CCACAAAGGGCCGAGTTAAGATTTCCACCAGAACTCTCGAATGATCCGTATTAACTCTTTATCTTCCAATAGAGAATCCTCTCGCCATCC
1417	GGAAAAGTTACATTTTAGTTTCATATGATACTTTCAACCTCATGTCATTT	CCACAAAGGGCCGAGTTAAG	AGAGAATCCTCTCGCCATCC	CCACAAAGGGCCGAGTTAAGGGAAAAGTTACATTTTAGTTTCATATGATACTTTCAACCTCATGTCATTTAGAGAATCCTCTCGCCATCC
1418	AGAATCATCTCACACTGAACTTTGCTCCACGTGCTTTGATTAAATCGGTT	CCACAAAGGGCCGAGTTAAG	AGAGAATCCTCTCGCCATCC	CCACAAAGGGCCGAGTTAAGAGAATCATCTCACACTGAACTTTGCTCCACGTGCTTTGATTAAATCGGTTAGAGAATCCTCTCGCCATCC
1419	GTGTGCTTTTGTGAGTAGTCTTGCTCAGAAAATGGAGGAGAGGCACCACA	CCACAAAGGGCCGAGTTAAG	AGAGAATCCTCTCGCCATCC	CCACAAAGGGCCGAGTTAAGGTGTGCTTTTGTGAGTAGTCTTGCTCAGAAAATGGAGGAGAGGCACCACAAGAGAATCCTCTCGCCATCC
1420	CTGGAAATTCTGAGAACTGTTGAAGGATAATTTGCCCATGTACAACAACG	CCACAAAGGGCCGAGTTAAG	AGAGAATCCTCTCGCCATCC	CCACAAAGGGCCGAGTTAAGCTGGAAATTCTGAGAACTGTTGAAGGATAATTTGCCCATGTACAACAACGAGAGAATCCTCTCGCCATCC
1421	GTTTCTTGATCACATCCGAGAAAGAAAGTCGCGATACCCGAGCCTGATCC	CCACAAAGGGCCGAGTTAAG	AGAGAATCCTCTCGCCATCC	CCACAAAGGGCCGAGTTAAGGTTTCTTGATCACATCCGAGAAAGAAAGTCGCGATACCCGAGCCTGATCCAGAGAATCCTCTCGCCATCC
1422	TGACAAAGAGCTTGATCCCTTATTTCTCTTCTGTTTCATCGAATTCCAGT	CCACAAAGGGCCGAGTTAAG	AGAGAATCCTCTCGCCATCC	CCACAAAGGGCCGAGTTAAGTGACAAAGAGCTTGATCCCTTATTTCTCTTCTGTTTCATCGAATTCCAGTAGAGAATCCTCTCGCCATCC
1423	AGATTGGTCTTTCATATTTTCACCATCCTCCCTTGAACCTATTCTCAGTA	CCACAAAGGGCCGAGTTAAG	AGAGAATCCTCTCGCCATCC	CCACAAAGGGCCGAGTTAAGAGATTGGTCTTTCATATTTTCACCATCCTCCCTTGAACCTATTCTCAGTAAGAGAATCCTCTCGCCATCC
1424	TTTGTAAATGAATGCCCCTTGAGAAATTATAAAATCCCCTATAGATGCTC	CCACAAAGGGCCGAGTTAAG	AGAGAATCCTCTCGCCATCC	CCACAAAGGGCCGAGTTAAGTTTGTAAATGAATGCCCCTTGAGAAATTATAAAATCCCCTATAGATGCTCAGAGAATCCTCTCGCCATCC
1425	AATTGATTCCTTTGAAATTTTAAGAGGCTTCTCCTTAAAGTTTGAACAAG	CCACAAAGGGCCGAGTTAAG	AGAGAATCCTCTCGCCATCC	CCACAAAGGGCCGAGTTAAGAATTGATTCCTTTGAAATTTTAAGAGGCTTCTCCTTAAAGTTTGAACAAGAGAGAATCCTCTCGCCATCC
1426	TTTAGCCTTAGAGTTCTGCCATTTCTTACCTGATTTCGCTCTTATGATTT	CCACAAAGGGCCGAGTTAAG	AGAGAATCCTCTCGCCATCC	CCACAAAGGGCCGAGTTAAGTTTAGCCTTAGAGTTCTGCCATTTCTTACCTGATTTCGCTCTTATGATTTAGAGAATCCTCTCGCCATCC
1427	TCAGTGGGTGAGTGCGCGTTTGAGAGTAAAAGAAATAAAGAGAGAGGTCT	CCACAAAGGGCCGAGTTAAG	AGAGAATCCTCTCGCCATCC	CCACAAAGGGCCGAGTTAAGTCAGTGGGTGAGTGCGCGTTTGAGAGTAAAAGAAATAAAGAGAGAGGTCTAGAGAATCCTCTCGCCATCC
1428	ATACCACACAGTCTTATACCATGTTAAAGTTCCACTTAACAATAATCAAC	CCACAAAGGGCCGAGTTAAG	AGAGAATCCTCTCGCCATCC	CCACAAAGGGCCGAGTTAAGATACCACACAGTCTTATACCATGTTAAAGTTCCACTTAACAATAATCAACAGAGAATCCTCTCGCCATCC
1429	AGAGACTGAAACCTTTACAAATCCCTTAAAGCACAACTCTAAAGAACATA	CCACAAAGGGCCGAGTTAAG	AGAGAATCCTCTCGCCATCC	CCACAAAGGGCCGAGTTAAGAGAGACTGAAACCTTTACAAATCCCTTAAAGCACAACTCTAAAGAACATAAGAGAATCCTCTCGCCATCC
1430	TGAAACAGGAGATTTATGATGTCTTTTGGATTTGGGATGTTGGGGATTAT	CCACAAAGGGCCGAGTTAAG	AGAGAATCCTCTCGCCATCC	CCACAAAGGGCCGAGTTAAGTGAAACAGGAGATTTATGATGTCTTTTGGATTTGGGATGTTGGGGATTATAGAGAATCCTCTCGCCATCC
1431	TATTCATTTGCATGGTAAATTTGAGTAATTCTTGATAAATGCTCTTCCAT	CCACAAAGGGCCGAGTTAAG	AGAGAATCCTCTCGCCATCC	CCACAAAGGGCCGAGTTAAGTATTCATTTGCATGGTAAATTTGAGTAATTCTTGATAAATGCTCTTCCATAGAGAATCCTCTCGCCATCC
1432	TTTCCCAGAATCAGTTCACCAACCCAAGGGATTCACCTCTCGGCGTCCTA	CCACAAAGGGCCGAGTTAAG	AGAGAATCCTCTCGCCATCC	CCACAAAGGGCCGAGTTAAGTTTCCCAGAATCAGTTCACCAACCCAAGGGATTCACCTCTCGGCGTCCTAAGAGAATCCTCTCGCCATCC
1433	ATATCTTTTCATTTGAATATGTTAATTAAATCCTTACCTGAAACATAAAT	CCACAAAGGGCCGAGTTAAG	AGAGAATCCTCTCGCCATCC	CCACAAAGGGCCGAGTTAAGATATCTTTTCATTTGAATATGTTAATTAAATCCTTACCTGAAACATAAATAGAGAATCCTCTCGCCATCC
1434	CAAGTATACTATTATTGCACGAATGATAGTCAAGTGTTATTTATTTAAGT	CCACAAAGGGCCGAGTTAAG	AGAGAATCCTCTCGCCATCC	CCACAAAGGGCCGAGTTAAGCAAGTATACTATTATTGCACGAATGATAGTCAAGTGTTATTTATTTAAGTAGAGAATCCTCTCGCCATCC
1435	TTAATTAGATTATCACATTTTCGCTTATTTGTTTTATTTGAAATACCAGT	CCACAAAGGGCCGAGTTAAG	AGAGAATCCTCTCGCCATCC	CCACAAAGGGCCGAGTTAAGTTAATTAGATTATCACATTTTCGCTTATTTGTTTTATTTGAAATACCAGTAGAGAATCCTCTCGCCATCC
1436	TTTATCGAATTTGATTTTGAGAGGAGGAGAAAAGAAGATATATTAGAGCA	CCACAAAGGGCCGAGTTAAG	AGAGAATCCTCTCGCCATCC	CCACAAAGGGCCGAGTTAAGTTTATCGAATTTGATTTTGAGAGGAGGAGAAAAGAAGATATATTAGAGCAAGAGAATCCTCTCGCCATCC
1437	GAACATAATTACATTTCTCCTCTCCCTAGTAATCTTCTTATTGTTGTCTT	CCACAAAGGGCCGAGTTAAG	AGAGAATCCTCTCGCCATCC	CCACAAAGGGCCGAGTTAAGGAACATAATTACATTTCTCCTCTCCCTAGTAATCTTCTTATTGTTGTCTTAGAGAATCCTCTCGCCATCC
1438	TTATTTGTTTTGACCCTACTTTTAAGCATTGAGAGTAGAGCTGTAAACGA	CCACAAAGGGCCGAGTTAAG	AGAGAATCCTCTCGCCATCC	CCACAAAGGGCCGAGTTAAGTTATTTGTTTTGACCCTACTTTTAAGCATTGAGAGTAGAGCTGTAAACGAAGAGAATCCTCTCGCCATCC
1439	CGGCTCCTTTCGATCACACCAGTTGCAGATTGGAGACGCTATCACATGAC	CCACAAAGGGCCGAGTTAAG	AGAGAATCCTCTCGCCATCC	CCACAAAGGGCCGAGTTAAGCGGCTCCTTTCGATCACACCAGTTGCAGATTGGAGACGCTATCACATGACAGAGAATCCTCTCGCCATCC
1440	CTAAATAGTATGAAACATCAATTTAAATATGATATTTTCTTTATGATTAG	CCACAAAGGGCCGAGTTAAG	AGAGAATCCTCTCGCCATCC	CCACAAAGGGCCGAGTTAAGCTAAATAGTATGAAACATCAATTTAAATATGATATTTTCTTTATGATTAGAGAGAATCCTCTCGCCATCC
1441	TGCTCAGCAAGAGGAAGTTCTTACAATTGAGAAATTAATAGCAGAGGCAT	CCACAAAGGGCCGAGTTAAG	AGAGAATCCTCTCGCCATCC	CCACAAAGGGCCGAGTTAAGTGCTCAGCAAGAGGAAGTTCTTACAATTGAGAAATTAATAGCAGAGGCATAGAGAATCCTCTCGCCATCC
1442	ATATGCTCATGTCTCTGAACTAAAATATTTATTAATGGTGTTCTCTGCTT	CCACAAAGGGCCGAGTTAAG	AGAGAATCCTCTCGCCATCC	CCACAAAGGGCCGAGTTAAGATATGCTCATGTCTCTGAACTAAAATATTTATTAATGGTGTTCTCTGCTTAGAGAATCCTCTCGCCATCC
1443	AGGGGAAATTTCTGCAGCGTAACTATAGATTACTAGATGGAATTATATTA	CCACAAAGGGCCGAGTTAAG	AGAGAATCCTCTCGCCATCC	CCACAAAGGGCCGAGTTAAGAGGGGAAATTTCTGCAGCGTAACTATAGATTACTAGATGGAATTATATTAAGAGAATCCTCTCGCCATCC
1444	CTAAATTTAGAGGATTCATAATGTGCAGGTACTAATATTTGACATTAAAA	CCACAAAGGGCCGAGTTAAG	AGAGAATCCTCTCGCCATCC	CCACAAAGGGCCGAGTTAAGCTAAATTTAGAGGATTCATAATGTGCAGGTACTAATATTTGACATTAAAAAGAGAATCCTCTCGCCATCC
1445	GTTTCCTTAAGATATTTAGAGTATGCATGCATGTACGTTATTGTTGTTCC	CCACAAAGGGCCGAGTTAAG	AGAGAATCCTCTCGCCATCC	CCACAAAGGGCCGAGTTAAGGTTTCCTTAAGATATTTAGAGTATGCATGCATGTACGTTATTGTTGTTCCAGAGAATCCTCTCGCCATCC
1446	AAAGTAAAGTATTTGTCATATACCATTGCAATCCATACTGAAAGATCTTT	CCACAAAGGGCCGAGTTAAG	AGAGAATCCTCTCGCCATCC	CCACAAAGGGCCGAGTTAAGAAAGTAAAGTATTTGTCATATACCATTGCAATCCATACTGAAAGATCTTTAGAGAATCCTCTCGCCATCC
1447	TTCATGAAGCTGTTAACAATTGAGCTGCATATAATAATAATGATATTACA	CCACAAAGGGCCGAGTTAAG	AGAGAATCCTCTCGCCATCC	CCACAAAGGGCCGAGTTAAGTTCATGAAGCTGTTAACAATTGAGCTGCATATAATAATAATGATATTACAAGAGAATCCTCTCGCCATCC
1448	CAAGCATGAAAAGATGAAGCAATGCGATAGAAATTTATACTCAAAATAAA	CCACAAAGGGCCGAGTTAAG	AGAGAATCCTCTCGCCATCC	CCACAAAGGGCCGAGTTAAGCAAGCATGAAAAGATGAAGCAATGCGATAGAAATTTATACTCAAAATAAAAGAGAATCCTCTCGCCATCC
1449	AAGTAATATCAAATATCAAGAAAGTGTTCAGTTGTAAAGTAAAATAAACC	CCACAAAGGGCCGAGTTAAG	AGAGAATCCTCTCGCCATCC	CCACAAAGGGCCGAGTTAAGAAGTAATATCAAATATCAAGAAAGTGTTCAGTTGTAAAGTAAAATAAACCAGAGAATCCTCTCGCCATCC
1450	CAACCGTGAATTCTTTTCTGATACAAATATTGGGGAAAACAGGCTGCATT	CCACAAAGGGCCGAGTTAAG	AGAGAATCCTCTCGCCATCC	CCACAAAGGGCCGAGTTAAGCAACCGTGAATTCTTTTCTGATACAAATATTGGGGAAAACAGGCTGCATTAGAGAATCCTCTCGCCATCC
1451	CAATGGCTAATGAACGAGTAATCTATTTCACCCCATTCTCAAATGTAGTT	CCACAAAGGGCCGAGTTAAG	AGAGAATCCTCTCGCCATCC	CCACAAAGGGCCGAGTTAAGCAATGGCTAATGAACGAGTAATCTATTTCACCCCATTCTCAAATGTAGTTAGAGAATCCTCTCGCCATCC
1452	TAAACAATTGGTAAAGTTTGAAATTACACAGCTTCATTCTAGTAGTTGCA	CCACAAAGGGCCGAGTTAAG	AGAGAATCCTCTCGCCATCC	CCACAAAGGGCCGAGTTAAGTAAACAATTGGTAAAGTTTGAAATTACACAGCTTCATTCTAGTAGTTGCAAGAGAATCCTCTCGCCATCC
1453	AATACCAGGTAGTATTTTCTCAAACTAAGCTACTAAAACGGTATCAAGGA	CCACAAAGGGCCGAGTTAAG	AGAGAATCCTCTCGCCATCC	CCACAAAGGGCCGAGTTAAGAATACCAGGTAGTATTTTCTCAAACTAAGCTACTAAAACGGTATCAAGGAAGAGAATCCTCTCGCCATCC
1454	TACATGTATTATCATTGCCCGTGTAAACAACTCCACCCGTCAGTTCTTCA	CCACAAAGGGCCGAGTTAAG	AGAGAATCCTCTCGCCATCC	CCACAAAGGGCCGAGTTAAGTACATGTATTATCATTGCCCGTGTAAACAACTCCACCCGTCAGTTCTTCAAGAGAATCCTCTCGCCATCC
1455	GTATTTTCATGCTTATAACATCTTTGTCCTTCTAGGTTCTGTTTTCCTTA	CCACAAAGGGCCGAGTTAAG	AGAGAATCCTCTCGCCATCC	CCACAAAGGGCCGAGTTAAGGTATTTTCATGCTTATAACATCTTTGTCCTTCTAGGTTCTGTTTTCCTTAAGAGAATCCTCTCGCCATCC
1456	ATAAAATAATTGTTAAATATCTGGTGGTACTTCAACTTAAACAATTAGTT	CCACAAAGGGCCGAGTTAAG	AGAGAATCCTCTCGCCATCC	CCACAAAGGGCCGAGTTAAGATAAAATAATTGTTAAATATCTGGTGGTACTTCAACTTAAACAATTAGTTAGAGAATCCTCTCGCCATCC
1457	AAAGTTTTGATGAATGTGATAAATGAAGTATCAGGGAAGGTAAAATAGAG	CCACAAAGGGCCGAGTTAAG	AGAGAATCCTCTCGCCATCC	CCACAAAGGGCCGAGTTAAGAAAGTTTTGATGAATGTGATAAATGAAGTATCAGGGAAGGTAAAATAGAGAGAGAATCCTCTCGCCATCC
1458	ACTTATATATTATTCCATAAATTGAAATCTTGCCAAGTTCTGTTTGTTGA	CCACAAAGGGCCGAGTTAAG	AGAGAATCCTCTCGCCATCC	CCACAAAGGGCCGAGTTAAGACTTATATATTATTCCATAAATTGAAATCTTGCCAAGTTCTGTTTGTTGAAGAGAATCCTCTCGCCATCC
1459	ATAGAAACACCCGACTATTCCCTCTCAGCTTTTGTTCTCTTTCCCTTCTT	CCACAAAGGGCCGAGTTAAG	AGAGAATCCTCTCGCCATCC	CCACAAAGGGCCGAGTTAAGATAGAAACACCCGACTATTCCCTCTCAGCTTTTGTTCTCTTTCCCTTCTTAGAGAATCCTCTCGCCATCC
1460	TTCCTCCTTTCCTTTTATATTTTGTAATTGTGGGAGAGACTATGGTGGTG	CCACAAAGGGCCGAGTTAAG	AGAGAATCCTCTCGCCATCC	CCACAAAGGGCCGAGTTAAGTTCCTCCTTTCCTTTTATATTTTGTAATTGTGGGAGAGACTATGGTGGTGAGAGAATCCTCTCGCCATCC
1461	AGAATGTACCAAGAAAATCTCTGATCCAAGCTATGTTGAAATATTAAATC	CCACAAAGGGCCGAGTTAAG	AGAGAATCCTCTCGCCATCC	CCACAAAGGGCCGAGTTAAGAGAATGTACCAAGAAAATCTCTGATCCAAGCTATGTTGAAATATTAAATCAGAGAATCCTCTCGCCATCC
1462	TCCTTGTTCCAATATTAAATCAAGCACTGACTACGTACTTCCAACATAGC	CCACAAAGGGCCGAGTTAAG	AGAGAATCCTCTCGCCATCC	CCACAAAGGGCCGAGTTAAGTCCTTGTTCCAATATTAAATCAAGCACTGACTACGTACTTCCAACATAGCAGAGAATCCTCTCGCCATCC
1463	TTTTGATTTTGTTCTACTTTCATGGATAATTTTCACTATTTCGACAACAT	CCACAAAGGGCCGAGTTAAG	AGAGAATCCTCTCGCCATCC	CCACAAAGGGCCGAGTTAAGTTTTGATTTTGTTCTACTTTCATGGATAATTTTCACTATTTCGACAACATAGAGAATCCTCTCGCCATCC
1464	AGAAAGAGAGAGACAGATAGGGAGTTGTAGAGAGGAGAGAGAGTTGGGAG	CCACAAAGGGCCGAGTTAAG	AGAGAATCCTCTCGCCATCC	CCACAAAGGGCCGAGTTAAGAGAAAGAGAGAGACAGATAGGGAGTTGTAGAGAGGAGAGAGAGTTGGGAGAGAGAATCCTCTCGCCATCC
1465	CTGGTCTCATGATGATCAAGTAATTTCTTAAATAATTTGTCTTGTATTTT	CCACAAAGGGCCGAGTTAAG	AGAGAATCCTCTCGCCATCC	CCACAAAGGGCCGAGTTAAGCTGGTCTCATGATGATCAAGTAATTTCTTAAATAATTTGTCTTGTATTTTAGAGAATCCTCTCGCCATCC
1466	AGACACACACTTGACTGCGAAACCTGATCAGATCCATTGATGAAGAGCTT	CCACAAAGGGCCGAGTTAAG	AGAGAATCCTCTCGCCATCC	CCACAAAGGGCCGAGTTAAGAGACACACACTTGACTGCGAAACCTGATCAGATCCATTGATGAAGAGCTTAGAGAATCCTCTCGCCATCC
1467	TCTTACATCCTCTCGAGCTACCTTGTCTCCTCCTATCTTCTTTGATGTGC	CCACAAAGGGCCGAGTTAAG	AGAGAATCCTCTCGCCATCC	CCACAAAGGGCCGAGTTAAGTCTTACATCCTCTCGAGCTACCTTGTCTCCTCCTATCTTCTTTGATGTGCAGAGAATCCTCTCGCCATCC
1468	AGTGCCATAGTCTTATCAAATCATCCTTCGCTCAAGATCAAATAGGTGAA	CCACAAAGGGCCGAGTTAAG	AGAGAATCCTCTCGCCATCC	CCACAAAGGGCCGAGTTAAGAGTGCCATAGTCTTATCAAATCATCCTTCGCTCAAGATCAAATAGGTGAAAGAGAATCCTCTCGCCATCC
1469	TGTGCTGGAATTTTAAGCAGAGGAGGAGGGATTTATACACCCATAGGACT	CCACAAAGGGCCGAGTTAAG	AGAGAATCCTCTCGCCATCC	CCACAAAGGGCCGAGTTAAGTGTGCTGGAATTTTAAGCAGAGGAGGAGGGATTTATACACCCATAGGACTAGAGAATCCTCTCGCCATCC
1470	AAATCATGTTCTGGGATTTGCTGATTGGGAGTGTGCTTTCTCTTTGCTTT	CCACAAAGGGCCGAGTTAAG	AGAGAATCCTCTCGCCATCC	CCACAAAGGGCCGAGTTAAGAAATCATGTTCTGGGATTTGCTGATTGGGAGTGTGCTTTCTCTTTGCTTTAGAGAATCCTCTCGCCATCC
1471	GGGGTTAGAGTGATCACATCTACGATCCCTATGAAGCCACAACTCTTTGC	CCACAAAGGGCCGAGTTAAG	AGAGAATCCTCTCGCCATCC	CCACAAAGGGCCGAGTTAAGGGGGTTAGAGTGATCACATCTACGATCCCTATGAAGCCACAACTCTTTGCAGAGAATCCTCTCGCCATCC
1472	GCTAACTGTATTTTGAGTTGTTTATTATGTTGCTGTTAAACAGGGAAAGT	CCACAAAGGGCCGAGTTAAG	AGAGAATCCTCTCGCCATCC	CCACAAAGGGCCGAGTTAAGGCTAACTGTATTTTGAGTTGTTTATTATGTTGCTGTTAAACAGGGAAAGTAGAGAATCCTCTCGCCATCC
1473	TCCCAGCAATGCAGACTCTCAATAGGATGGATACCTTCTTGCCTCCTCTT	CCACAAAGGGCCGAGTTAAG	AGAGAATCCTCTCGCCATCC	CCACAAAGGGCCGAGTTAAGTCCCAGCAATGCAGACTCTCAATAGGATGGATACCTTCTTGCCTCCTCTTAGAGAATCCTCTCGCCATCC
1474	TTATTTGCTCGAGGAGGAGTAATTTATCAACTTCGTGCTACTTTTGCGTT	CCACAAAGGGCCGAGTTAAG	AGAGAATCCTCTCGCCATCC	CCACAAAGGGCCGAGTTAAGTTATTTGCTCGAGGAGGAGTAATTTATCAACTTCGTGCTACTTTTGCGTTAGAGAATCCTCTCGCCATCC
1475	AGACAACATTAGTTTTAAGATTTGTTAGGACTAATACAACTTCACTTTGA	CCACAAAGGGCCGAGTTAAG	AGAGAATCCTCTCGCCATCC	CCACAAAGGGCCGAGTTAAGAGACAACATTAGTTTTAAGATTTGTTAGGACTAATACAACTTCACTTTGAAGAGAATCCTCTCGCCATCC
1476	AACCTATTTTCTTCAACCCACCCTTCAAGCAAATATTTAATGTTTTCTTA	CCACAAAGGGCCGAGTTAAG	AGAGAATCCTCTCGCCATCC	CCACAAAGGGCCGAGTTAAGAACCTATTTTCTTCAACCCACCCTTCAAGCAAATATTTAATGTTTTCTTAAGAGAATCCTCTCGCCATCC
1477	TGTCAACTGCAAGCCTCATGGATCCCTTGAACATGTCGATTTTGGCATTC	CCACAAAGGGCCGAGTTAAG	AGAGAATCCTCTCGCCATCC	CCACAAAGGGCCGAGTTAAGTGTCAACTGCAAGCCTCATGGATCCCTTGAACATGTCGATTTTGGCATTCAGAGAATCCTCTCGCCATCC
1478	TCCCTATTCTAGTTTTCACACCTTCTTGATTCTATACTCTTCTAGTAGTA	CCACAAAGGGCCGAGTTAAG	AGAGAATCCTCTCGCCATCC	CCACAAAGGGCCGAGTTAAGTCCCTATTCTAGTTTTCACACCTTCTTGATTCTATACTCTTCTAGTAGTAAGAGAATCCTCTCGCCATCC
1479	AGTAAAATGAAATGCTGGAAAAGAAATACCATATAAGTTGGGTACTACTA	CCACAAAGGGCCGAGTTAAG	AGAGAATCCTCTCGCCATCC	CCACAAAGGGCCGAGTTAAGAGTAAAATGAAATGCTGGAAAAGAAATACCATATAAGTTGGGTACTACTAAGAGAATCCTCTCGCCATCC
1480	GGACCTATAACACAACCACAAGTGAAGGATCAACTAAATGCAGCAAGCCC	CCACAAAGGGCCGAGTTAAG	AGAGAATCCTCTCGCCATCC	CCACAAAGGGCCGAGTTAAGGGACCTATAACACAACCACAAGTGAAGGATCAACTAAATGCAGCAAGCCCAGAGAATCCTCTCGCCATCC
1481	CAGCCTCTTGTAAGTACATCCTCTATTACATTGTTTTAGTACAATAATAG	CCACAAAGGGCCGAGTTAAG	AGAGAATCCTCTCGCCATCC	CCACAAAGGGCCGAGTTAAGCAGCCTCTTGTAAGTACATCCTCTATTACATTGTTTTAGTACAATAATAGAGAGAATCCTCTCGCCATCC
1482	TATCAATTTAGCCTGCAAAGAAAGAGAGGATTTGGAAGTAAATAATAGGA	CCACAAAGGGCCGAGTTAAG	AGAGAATCCTCTCGCCATCC	CCACAAAGGGCCGAGTTAAGTATCAATTTAGCCTGCAAAGAAAGAGAGGATTTGGAAGTAAATAATAGGAAGAGAATCCTCTCGCCATCC
1483	CCAAGTTCATGATCCTAATTTGGTACTTGCTCTCTAGATAATGTTATTTA	CCACAAAGGGCCGAGTTAAG	AGAGAATCCTCTCGCCATCC	CCACAAAGGGCCGAGTTAAGCCAAGTTCATGATCCTAATTTGGTACTTGCTCTCTAGATAATGTTATTTAAGAGAATCCTCTCGCCATCC
1484	TTTTGTTTCCCTCTGCCCTTGATTTATGTACAACCTTTTCTTGTCCTGGT	CCACAAAGGGCCGAGTTAAG	AGAGAATCCTCTCGCCATCC	CCACAAAGGGCCGAGTTAAGTTTTGTTTCCCTCTGCCCTTGATTTATGTACAACCTTTTCTTGTCCTGGTAGAGAATCCTCTCGCCATCC
1485	TTGGACACTACTGTACAATCCTCCTAATTCTTGACTTGTGAAACAAACAA	CCACAAAGGGCCGAGTTAAG	AGAGAATCCTCTCGCCATCC	CCACAAAGGGCCGAGTTAAGTTGGACACTACTGTACAATCCTCCTAATTCTTGACTTGTGAAACAAACAAAGAGAATCCTCTCGCCATCC
1486	TAGTTAAAGTCACTAGAAACTGAAATATAAATATAGGACAAAGAATAATT	CCACAAAGGGCCGAGTTAAG	AGAGAATCCTCTCGCCATCC	CCACAAAGGGCCGAGTTAAGTAGTTAAAGTCACTAGAAACTGAAATATAAATATAGGACAAAGAATAATTAGAGAATCCTCTCGCCATCC
1487	TACAATCAATAATTCATCTGGAAATAGCTCTTCAATCCTACCACGTAAGG	CCACAAAGGGCCGAGTTAAG	AGAGAATCCTCTCGCCATCC	CCACAAAGGGCCGAGTTAAGTACAATCAATAATTCATCTGGAAATAGCTCTTCAATCCTACCACGTAAGGAGAGAATCCTCTCGCCATCC
1488	TTCCTAACATCAAAACCCGAAACAGATTAAATTGAACAATAGAGAGTCGA	CCACAAAGGGCCGAGTTAAG	AGAGAATCCTCTCGCCATCC	CCACAAAGGGCCGAGTTAAGTTCCTAACATCAAAACCCGAAACAGATTAAATTGAACAATAGAGAGTCGAAGAGAATCCTCTCGCCATCC
1489	GGGCAAATACATTACACACAAAATTTAGGGTTTATCAATCATTACCATTT	CCACAAAGGGCCGAGTTAAG	AGAGAATCCTCTCGCCATCC	CCACAAAGGGCCGAGTTAAGGGGCAAATACATTACACACAAAATTTAGGGTTTATCAATCATTACCATTTAGAGAATCCTCTCGCCATCC
1490	GTGGTCTTTGGCCATTTTGAAGTCATAGTCTGTGTGCACTTTGTTATTCT	CCACAAAGGGCCGAGTTAAG	AGAGAATCCTCTCGCCATCC	CCACAAAGGGCCGAGTTAAGGTGGTCTTTGGCCATTTTGAAGTCATAGTCTGTGTGCACTTTGTTATTCTAGAGAATCCTCTCGCCATCC
1491	TGTAAAGATGTCTTAGTCTTGGTTATCATTAAGCTGGTGAAAACTCTTAT	CCACAAAGGGCCGAGTTAAG	AGAGAATCCTCTCGCCATCC	CCACAAAGGGCCGAGTTAAGTGTAAAGATGTCTTAGTCTTGGTTATCATTAAGCTGGTGAAAACTCTTATAGAGAATCCTCTCGCCATCC
1492	TTAAATAAAGCCCTATGAAGTATAAATATCGTGTTTTAGAAGAAATACTT	CCACAAAGGGCCGAGTTAAG	AGAGAATCCTCTCGCCATCC	CCACAAAGGGCCGAGTTAAGTTAAATAAAGCCCTATGAAGTATAAATATCGTGTTTTAGAAGAAATACTTAGAGAATCCTCTCGCCATCC
1493	TCTACTCATTGAGACGCGAAGTTCTTCAATTTCTACCAATAACAATGGAT	CCACAAAGGGCCGAGTTAAG	AGAGAATCCTCTCGCCATCC	CCACAAAGGGCCGAGTTAAGTCTACTCATTGAGACGCGAAGTTCTTCAATTTCTACCAATAACAATGGATAGAGAATCCTCTCGCCATCC
1494	CTCTTGGAACGAGTATAAACCAATATGCATAAAGAATTAGGGGTGAATTC	CCACAAAGGGCCGAGTTAAG	AGAGAATCCTCTCGCCATCC	CCACAAAGGGCCGAGTTAAGCTCTTGGAACGAGTATAAACCAATATGCATAAAGAATTAGGGGTGAATTCAGAGAATCCTCTCGCCATCC
1495	TTATAATTCATCTCTGGAGCATATTTTCCTAAACTATTATGCCAATGAAT	CCACAAAGGGCCGAGTTAAG	AGAGAATCCTCTCGCCATCC	CCACAAAGGGCCGAGTTAAGTTATAATTCATCTCTGGAGCATATTTTCCTAAACTATTATGCCAATGAATAGAGAATCCTCTCGCCATCC
1496	AAGGTAGAGGAGTCCGTCGGCTTAAAGAGGAAAATCTGGGGAGCAACATC	CCACAAAGGGCCGAGTTAAG	AGAGAATCCTCTCGCCATCC	CCACAAAGGGCCGAGTTAAGAAGGTAGAGGAGTCCGTCGGCTTAAAGAGGAAAATCTGGGGAGCAACATCAGAGAATCCTCTCGCCATCC
1497	GATTTGATTGTTGGTATTTATGCATTTAAAGAAAAGCTTGAATGTTACTA	CCACAAAGGGCCGAGTTAAG	AGAGAATCCTCTCGCCATCC	CCACAAAGGGCCGAGTTAAGGATTTGATTGTTGGTATTTATGCATTTAAAGAAAAGCTTGAATGTTACTAAGAGAATCCTCTCGCCATCC
1498	CAATTCACATTGGGCTTATTGATATATATAAGTCAAGTGATTGGATGGCT	CCACAAAGGGCCGAGTTAAG	AGAGAATCCTCTCGCCATCC	CCACAAAGGGCCGAGTTAAGCAATTCACATTGGGCTTATTGATATATATAAGTCAAGTGATTGGATGGCTAGAGAATCCTCTCGCCATCC
1499	TAAGTTCCATAGGCTTCAAACTGCTATATATTATGAAAGAAACATCAGTG	CCACAAAGGGCCGAGTTAAG	AGAGAATCCTCTCGCCATCC	CCACAAAGGGCCGAGTTAAGTAAGTTCCATAGGCTTCAAACTGCTATATATTATGAAAGAAACATCAGTGAGAGAATCCTCTCGCCATCC
1500	AACCTCCAGAAACCAATAACTTCTCGAAACTGAACCCATGAAATCTTAAG	CCACAAAGGGCCGAGTTAAG	AGAGAATCCTCTCGCCATCC	CCACAAAGGGCCGAGTTAAGAACCTCCAGAAACCAATAACTTCTCGAAACTGAACCCATGAAATCTTAAGAGAGAATCCTCTCGCCATCC
1501	ACTGTCAGACGTTTGGTTAGAGGTTCTGTAAGTTGGAGGTCACGATTGAG	CCACAAAGGGCCGAGTTAAG	AGAGAATCCTCTCGCCATCC	CCACAAAGGGCCGAGTTAAGACTGTCAGACGTTTGGTTAGAGGTTCTGTAAGTTGGAGGTCACGATTGAGAGAGAATCCTCTCGCCATCC
1502	AAATGAGATTGAGGAAAATGAATTGTGTGGTGTTACTGGGGATGATGAAC	CCACAAAGGGCCGAGTTAAG	AGAGAATCCTCTCGCCATCC	CCACAAAGGGCCGAGTTAAGAAATGAGATTGAGGAAAATGAATTGTGTGGTGTTACTGGGGATGATGAACAGAGAATCCTCTCGCCATCC
1503	ACAGCAAATCAGTCCTCTCGTTATTGAAGCCTACTACCTCCTTTTCATCT	CCACAAAGGGCCGAGTTAAG	AGAGAATCCTCTCGCCATCC	CCACAAAGGGCCGAGTTAAGACAGCAAATCAGTCCTCTCGTTATTGAAGCCTACTACCTCCTTTTCATCTAGAGAATCCTCTCGCCATCC
1504	AGAAAGGAGACTAACAGATATATCCATCATCCCCATCCAAATTTAGCAGA	CCACAAAGGGCCGAGTTAAG	AGAGAATCCTCTCGCCATCC	CCACAAAGGGCCGAGTTAAGAGAAAGGAGACTAACAGATATATCCATCATCCCCATCCAAATTTAGCAGAAGAGAATCCTCTCGCCATCC
1505	ACTTAGTTCAGGGACTAGAAGCCACACTACACCAATAACTACTCGGGAAC	CCACAAAGGGCCGAGTTAAG	AGAGAATCCTCTCGCCATCC	CCACAAAGGGCCGAGTTAAGACTTAGTTCAGGGACTAGAAGCCACACTACACCAATAACTACTCGGGAACAGAGAATCCTCTCGCCATCC
1506	TCTATACTCACATCATAGGCATGGCATCAATTAGAATTTCCACAGTCATT	CCACAAAGGGCCGAGTTAAG	AGAGAATCCTCTCGCCATCC	CCACAAAGGGCCGAGTTAAGTCTATACTCACATCATAGGCATGGCATCAATTAGAATTTCCACAGTCATTAGAGAATCCTCTCGCCATCC
1507	AATCTTGATATTTTCTACTACATATTTAACTTATTAATTTCTTTAAAAGT	CCACAAAGGGCCGAGTTAAG	AGAGAATCCTCTCGCCATCC	CCACAAAGGGCCGAGTTAAGAATCTTGATATTTTCTACTACATATTTAACTTATTAATTTCTTTAAAAGTAGAGAATCCTCTCGCCATCC
1508	AGCTGAGATGATAAATTTTGAGCCCTGATAACCTTTTAAGCACACAATAT	CCACAAAGGGCCGAGTTAAG	AGAGAATCCTCTCGCCATCC	CCACAAAGGGCCGAGTTAAGAGCTGAGATGATAAATTTTGAGCCCTGATAACCTTTTAAGCACACAATATAGAGAATCCTCTCGCCATCC
1509	CAGTTCAGTTGTTTCTACTCTCCTGGCTCTAATGGATGGTTTGAAGTCTC	CCACAAAGGGCCGAGTTAAG	AGAGAATCCTCTCGCCATCC	CCACAAAGGGCCGAGTTAAGCAGTTCAGTTGTTTCTACTCTCCTGGCTCTAATGGATGGTTTGAAGTCTCAGAGAATCCTCTCGCCATCC
1510	TGCATTGCATCTTGTTCCCTGTTTACTGAAACCTTTGACCAAATTGCTTG	CCACAAAGGGCCGAGTTAAG	AGAGAATCCTCTCGCCATCC	CCACAAAGGGCCGAGTTAAGTGCATTGCATCTTGTTCCCTGTTTACTGAAACCTTTGACCAAATTGCTTGAGAGAATCCTCTCGCCATCC
1511	TACATCTGAAGATTTTGCTGATAATGGTTATCTAAAGTTTAAACCTTCCA	CCACAAAGGGCCGAGTTAAG	AGAGAATCCTCTCGCCATCC	CCACAAAGGGCCGAGTTAAGTACATCTGAAGATTTTGCTGATAATGGTTATCTAAAGTTTAAACCTTCCAAGAGAATCCTCTCGCCATCC
1512	AGTGTATAATTTTGACATCAGGTTTGTTTCCACTTGTTTCATTTATTAGA	CCACAAAGGGCCGAGTTAAG	AGAGAATCCTCTCGCCATCC	CCACAAAGGGCCGAGTTAAGAGTGTATAATTTTGACATCAGGTTTGTTTCCACTTGTTTCATTTATTAGAAGAGAATCCTCTCGCCATCC
1513	TGCCTTGCATGCCAATCAAACCATAACATCTTGGTGGATCTTTCAATTTT	CCACAAAGGGCCGAGTTAAG	AGAGAATCCTCTCGCCATCC	CCACAAAGGGCCGAGTTAAGTGCCTTGCATGCCAATCAAACCATAACATCTTGGTGGATCTTTCAATTTTAGAGAATCCTCTCGCCATCC
1514	TTCAGCAGCTAAAGAAAGTAGACTTACCAGAATCATCAAAGATGTGCATA	CCACAAAGGGCCGAGTTAAG	AGAGAATCCTCTCGCCATCC	CCACAAAGGGCCGAGTTAAGTTCAGCAGCTAAAGAAAGTAGACTTACCAGAATCATCAAAGATGTGCATAAGAGAATCCTCTCGCCATCC
1515	TTTATTGGCAGATACAAGAAAATTAGGTTCAACAAACGATCTATATCTCT	CCACAAAGGGCCGAGTTAAG	AGAGAATCCTCTCGCCATCC	CCACAAAGGGCCGAGTTAAGTTTATTGGCAGATACAAGAAAATTAGGTTCAACAAACGATCTATATCTCTAGAGAATCCTCTCGCCATCC
1516	AAGCAATAGAATTGGACTATCATATTCATTGGCTCATAATTATCATAAAA	CCACAAAGGGCCGAGTTAAG	AGAGAATCCTCTCGCCATCC	CCACAAAGGGCCGAGTTAAGAAGCAATAGAATTGGACTATCATATTCATTGGCTCATAATTATCATAAAAAGAGAATCCTCTCGCCATCC
1517	GGTTTTGATAGACCGATGAGAATGTTTGGTGCTTTTGGATCATTACAACT	CCACAAAGGGCCGAGTTAAG	AGAGAATCCTCTCGCCATCC	CCACAAAGGGCCGAGTTAAGGGTTTTGATAGACCGATGAGAATGTTTGGTGCTTTTGGATCATTACAACTAGAGAATCCTCTCGCCATCC
1518	TGGACCCGTAAGGAAGACTGGCTTATTATACTCCCTTGACAAATAATCAA	CCACAAAGGGCCGAGTTAAG	AGAGAATCCTCTCGCCATCC	CCACAAAGGGCCGAGTTAAGTGGACCCGTAAGGAAGACTGGCTTATTATACTCCCTTGACAAATAATCAAAGAGAATCCTCTCGCCATCC
1519	TTGTTCTGCAATGAAACCTCAAGAGATTCTAGAAGAGTAGATCAAGCTTG	CCACAAAGGGCCGAGTTAAG	AGAGAATCCTCTCGCCATCC	CCACAAAGGGCCGAGTTAAGTTGTTCTGCAATGAAACCTCAAGAGATTCTAGAAGAGTAGATCAAGCTTGAGAGAATCCTCTCGCCATCC
1520	CTTGGAAACTTGGTGTCTTCTTTATCTTCCTCTATTGTCCATTAAACCAT	CCACAAAGGGCCGAGTTAAG	AGAGAATCCTCTCGCCATCC	CCACAAAGGGCCGAGTTAAGCTTGGAAACTTGGTGTCTTCTTTATCTTCCTCTATTGTCCATTAAACCATAGAGAATCCTCTCGCCATCC
1521	AAAGCTTGTAAAAGACTCCAACCCTTACTAAGAACACCAGAAATGAAAAT	CCACAAAGGGCCGAGTTAAG	AGAGAATCCTCTCGCCATCC	CCACAAAGGGCCGAGTTAAGAAAGCTTGTAAAAGACTCCAACCCTTACTAAGAACACCAGAAATGAAAATAGAGAATCCTCTCGCCATCC
1522	AAAGCACCTTCCTTTGATGTTCTATTCCACACCTTCTCTACTCGATATCC	CCACAAAGGGCCGAGTTAAG	AGAGAATCCTCTCGCCATCC	CCACAAAGGGCCGAGTTAAGAAAGCACCTTCCTTTGATGTTCTATTCCACACCTTCTCTACTCGATATCCAGAGAATCCTCTCGCCATCC
1523	TATTTGTGAAAGATAGCAAGATAACTAATGAAGTAAAGAAGAATAAATTA	CCACAAAGGGCCGAGTTAAG	AGAGAATCCTCTCGCCATCC	CCACAAAGGGCCGAGTTAAGTATTTGTGAAAGATAGCAAGATAACTAATGAAGTAAAGAAGAATAAATTAAGAGAATCCTCTCGCCATCC
1524	TGAATTGAGATAAAGTGCATTGAGACAAGTATATTTAACAAATTGCCTAT	CCACAAAGGGCCGAGTTAAG	AGAGAATCCTCTCGCCATCC	CCACAAAGGGCCGAGTTAAGTGAATTGAGATAAAGTGCATTGAGACAAGTATATTTAACAAATTGCCTATAGAGAATCCTCTCGCCATCC
1525	CTACTTCTCTATTCTTTAAATATTTTGTCTTTCCCGTATAATATATATAT	CCACAAAGGGCCGAGTTAAG	AGAGAATCCTCTCGCCATCC	CCACAAAGGGCCGAGTTAAGCTACTTCTCTATTCTTTAAATATTTTGTCTTTCCCGTATAATATATATATAGAGAATCCTCTCGCCATCC
1526	TTTAATTCAAATTTTATATCAATTTCAGACGTTAGAATTATAAAACCATA	CCACAAAGGGCCGAGTTAAG	AGAGAATCCTCTCGCCATCC	CCACAAAGGGCCGAGTTAAGTTTAATTCAAATTTTATATCAATTTCAGACGTTAGAATTATAAAACCATAAGAGAATCCTCTCGCCATCC
1527	TAGAACTCAACTACTAAACTTGTGTCTAAAAGAACTACAAAGAAATAGTG	CCACAAAGGGCCGAGTTAAG	AGAGAATCCTCTCGCCATCC	CCACAAAGGGCCGAGTTAAGTAGAACTCAACTACTAAACTTGTGTCTAAAAGAACTACAAAGAAATAGTGAGAGAATCCTCTCGCCATCC
1528	AAGCTCGGATCAGAAATTATTGATTCCAACCCCTTACCATATAATCTTTC	CCACAAAGGGCCGAGTTAAG	AGAGAATCCTCTCGCCATCC	CCACAAAGGGCCGAGTTAAGAAGCTCGGATCAGAAATTATTGATTCCAACCCCTTACCATATAATCTTTCAGAGAATCCTCTCGCCATCC
1529	CTGGACATCCTGGGTTTATGACTACAAAACAATAATAAGTTCCCGAAGAA	CCACAAAGGGCCGAGTTAAG	AGAGAATCCTCTCGCCATCC	CCACAAAGGGCCGAGTTAAGCTGGACATCCTGGGTTTATGACTACAAAACAATAATAAGTTCCCGAAGAAAGAGAATCCTCTCGCCATCC
1530	CCTCCTCCCCATAGAAGACGGCAAGGACGGCGCACGAGAAAGAACACTGT	CCACAAAGGGCCGAGTTAAG	AGAGAATCCTCTCGCCATCC	CCACAAAGGGCCGAGTTAAGCCTCCTCCCCATAGAAGACGGCAAGGACGGCGCACGAGAAAGAACACTGTAGAGAATCCTCTCGCCATCC
1531	AGGTCAATAAAACAATCACACTAGCTGTTACAAATCATTATGTTTGAACC	CCACAAAGGGCCGAGTTAAG	AGAGAATCCTCTCGCCATCC	CCACAAAGGGCCGAGTTAAGAGGTCAATAAAACAATCACACTAGCTGTTACAAATCATTATGTTTGAACCAGAGAATCCTCTCGCCATCC
1532	GTCTTATGGTAGCTTGTGTAGAGTTTCATGAGAGTTTCGAGAAATATATA	CCACAAAGGGCCGAGTTAAG	AGAGAATCCTCTCGCCATCC	CCACAAAGGGCCGAGTTAAGGTCTTATGGTAGCTTGTGTAGAGTTTCATGAGAGTTTCGAGAAATATATAAGAGAATCCTCTCGCCATCC
1533	CTCAAAGATTTGGTGGTTCATACAAGGAAGTGTAAATTCTAACATGGAGG	CCACAAAGGGCCGAGTTAAG	AGAGAATCCTCTCGCCATCC	CCACAAAGGGCCGAGTTAAGCTCAAAGATTTGGTGGTTCATACAAGGAAGTGTAAATTCTAACATGGAGGAGAGAATCCTCTCGCCATCC
1534	AGAAGACAAAATTGAACTCTCCTTGCAAATGAAGTTTACAACAAATAGCT	CCACAAAGGGCCGAGTTAAG	AGAGAATCCTCTCGCCATCC	CCACAAAGGGCCGAGTTAAGAGAAGACAAAATTGAACTCTCCTTGCAAATGAAGTTTACAACAAATAGCTAGAGAATCCTCTCGCCATCC
1535	ATATTACTCAGTTGTCGGAGTATAGGAAAGATGGTCACACCTCAGTATTT	CCACAAAGGGCCGAGTTAAG	AGAGAATCCTCTCGCCATCC	CCACAAAGGGCCGAGTTAAGATATTACTCAGTTGTCGGAGTATAGGAAAGATGGTCACACCTCAGTATTTAGAGAATCCTCTCGCCATCC
1536	ATTTAGCTGCAGGTGGGATTAGTAGAAGAACAAGATTATTACCAATTCTT	CCACAAAGGGCCGAGTTAAG	AGAGAATCCTCTCGCCATCC	CCACAAAGGGCCGAGTTAAGATTTAGCTGCAGGTGGGATTAGTAGAAGAACAAGATTATTACCAATTCTTAGAGAATCCTCTCGCCATCC
1537	TCATCCATTAGTAAGAAATATTAAGTTTTGTGAACGTTAAGTCAGGCATT	CCACAAAGGGCCGAGTTAAG	AGAGAATCCTCTCGCCATCC	CCACAAAGGGCCGAGTTAAGTCATCCATTAGTAAGAAATATTAAGTTTTGTGAACGTTAAGTCAGGCATTAGAGAATCCTCTCGCCATCC
1538	TTGTGAATCACTTTTAAAACACACTCAATTAATTCATATATTTATCTTCT	CCACAAAGGGCCGAGTTAAG	AGAGAATCCTCTCGCCATCC	CCACAAAGGGCCGAGTTAAGTTGTGAATCACTTTTAAAACACACTCAATTAATTCATATATTTATCTTCTAGAGAATCCTCTCGCCATCC
1539	TTCAACTGAACCACGTTAATTTCTGTGTCTCCTATTCTGATTATTTATTT	CCACAAAGGGCCGAGTTAAG	AGAGAATCCTCTCGCCATCC	CCACAAAGGGCCGAGTTAAGTTCAACTGAACCACGTTAATTTCTGTGTCTCCTATTCTGATTATTTATTTAGAGAATCCTCTCGCCATCC
1540	AAGGAAATTAGAAATTACTGGGTAATGAAAATGAAGAGGGGATAGTGGAA	CCACAAAGGGCCGAGTTAAG	AGAGAATCCTCTCGCCATCC	CCACAAAGGGCCGAGTTAAGAAGGAAATTAGAAATTACTGGGTAATGAAAATGAAGAGGGGATAGTGGAAAGAGAATCCTCTCGCCATCC
1541	TTTTCACTTGCAAGTTCTACAAAGCACCAACCTTTTGCCATTGGACTAAT	CCACAAAGGGCCGAGTTAAG	AGAGAATCCTCTCGCCATCC	CCACAAAGGGCCGAGTTAAGTTTTCACTTGCAAGTTCTACAAAGCACCAACCTTTTGCCATTGGACTAATAGAGAATCCTCTCGCCATCC
1542	ATCAACATACCACCGTAAATATAATCCAGTGCCACCTACAATTATTGGGA	CCACAAAGGGCCGAGTTAAG	AGAGAATCCTCTCGCCATCC	CCACAAAGGGCCGAGTTAAGATCAACATACCACCGTAAATATAATCCAGTGCCACCTACAATTATTGGGAAGAGAATCCTCTCGCCATCC
1543	TTGAGTTCTGGCTGCCATTCATATTTCTGCTTCCTTCTTTTAAACTCATG	CCACAAAGGGCCGAGTTAAG	AGAGAATCCTCTCGCCATCC	CCACAAAGGGCCGAGTTAAGTTGAGTTCTGGCTGCCATTCATATTTCTGCTTCCTTCTTTTAAACTCATGAGAGAATCCTCTCGCCATCC
1544	TTTTCCAATGTTTGACACTACACATAAATTAAGGAATTGTTGATATCTAT	CCACAAAGGGCCGAGTTAAG	AGAGAATCCTCTCGCCATCC	CCACAAAGGGCCGAGTTAAGTTTTCCAATGTTTGACACTACACATAAATTAAGGAATTGTTGATATCTATAGAGAATCCTCTCGCCATCC
1545	GATAGTGAATATATCTGAAACCATAAATTATTTCTTAAACCACACAGAAT	CCACAAAGGGCCGAGTTAAG	AGAGAATCCTCTCGCCATCC	CCACAAAGGGCCGAGTTAAGGATAGTGAATATATCTGAAACCATAAATTATTTCTTAAACCACACAGAATAGAGAATCCTCTCGCCATCC
1546	CTCCTTATCCACTCCAAAACATCCATGCAATCTTTACGTCCAATGAAGTG	CCACAAAGGGCCGAGTTAAG	AGAGAATCCTCTCGCCATCC	CCACAAAGGGCCGAGTTAAGCTCCTTATCCACTCCAAAACATCCATGCAATCTTTACGTCCAATGAAGTGAGAGAATCCTCTCGCCATCC
1547	AGGTAGATAGAGTGAGTCTTACATTAGGACAGTACTTGGAGATGGCTGCG	CCACAAAGGGCCGAGTTAAG	AGAGAATCCTCTCGCCATCC	CCACAAAGGGCCGAGTTAAGAGGTAGATAGAGTGAGTCTTACATTAGGACAGTACTTGGAGATGGCTGCGAGAGAATCCTCTCGCCATCC
1548	ACTGTATGTCCCCTTGTTCATCTGAATACTGAATCAAGTACATCTGTTGA	CCACAAAGGGCCGAGTTAAG	AGAGAATCCTCTCGCCATCC	CCACAAAGGGCCGAGTTAAGACTGTATGTCCCCTTGTTCATCTGAATACTGAATCAAGTACATCTGTTGAAGAGAATCCTCTCGCCATCC
1549	TTGCTATTGGTGTTACACTGAGCAAAGTTGAAGTGAAAACCTGAATTATG	CCACAAAGGGCCGAGTTAAG	AGAGAATCCTCTCGCCATCC	CCACAAAGGGCCGAGTTAAGTTGCTATTGGTGTTACACTGAGCAAAGTTGAAGTGAAAACCTGAATTATGAGAGAATCCTCTCGCCATCC
1550	ACTATATTCCCACTATAGTCTGAAAGGAAATTATTCATCACTAAGAATAC	CCACAAAGGGCCGAGTTAAG	AGAGAATCCTCTCGCCATCC	CCACAAAGGGCCGAGTTAAGACTATATTCCCACTATAGTCTGAAAGGAAATTATTCATCACTAAGAATACAGAGAATCCTCTCGCCATCC
1551	TATGTCTTTTGCAGAAATCGCGTGTATGGAGCTTAAAGGGGATACATCTT	CCACAAAGGGCCGAGTTAAG	AGAGAATCCTCTCGCCATCC	CCACAAAGGGCCGAGTTAAGTATGTCTTTTGCAGAAATCGCGTGTATGGAGCTTAAAGGGGATACATCTTAGAGAATCCTCTCGCCATCC
1552	GCTAACTGGGGATCTTGAGGAAATATCTTGTGTGTGTGGGTAATGATAGA	CCACAAAGGGCCGAGTTAAG	AGAGAATCCTCTCGCCATCC	CCACAAAGGGCCGAGTTAAGGCTAACTGGGGATCTTGAGGAAATATCTTGTGTGTGTGGGTAATGATAGAAGAGAATCCTCTCGCCATCC
1553	TGCTGTAATGCTTTGCTTACCTTTGCTTTGTTCCTCCAATTACTATTCCA	CCACAAAGGGCCGAGTTAAG	AGAGAATCCTCTCGCCATCC	CCACAAAGGGCCGAGTTAAGTGCTGTAATGCTTTGCTTACCTTTGCTTTGTTCCTCCAATTACTATTCCAAGAGAATCCTCTCGCCATCC
1554	AAGGATTAAATTATGCATACTCATATTCTCCAATTAAACACAAAGAACCA	CCACAAAGGGCCGAGTTAAG	AGAGAATCCTCTCGCCATCC	CCACAAAGGGCCGAGTTAAGAAGGATTAAATTATGCATACTCATATTCTCCAATTAAACACAAAGAACCAAGAGAATCCTCTCGCCATCC
1555	CTATGAGCGGATATCCAAGAACAGCACAAATTTAACAGAAATCCCAAATA	CCACAAAGGGCCGAGTTAAG	AGAGAATCCTCTCGCCATCC	CCACAAAGGGCCGAGTTAAGCTATGAGCGGATATCCAAGAACAGCACAAATTTAACAGAAATCCCAAATAAGAGAATCCTCTCGCCATCC
1556	AGATGTGCCATCTTCCTGTACAAAGAATTAACCCATGTTGTAACCCTCTG	CCACAAAGGGCCGAGTTAAG	AGAGAATCCTCTCGCCATCC	CCACAAAGGGCCGAGTTAAGAGATGTGCCATCTTCCTGTACAAAGAATTAACCCATGTTGTAACCCTCTGAGAGAATCCTCTCGCCATCC
1557	CTATTACCTTTCCTTTTGAATAAATTGTTATCTTGTCATTCCAGAATACT	CCACAAAGGGCCGAGTTAAG	AGAGAATCCTCTCGCCATCC	CCACAAAGGGCCGAGTTAAGCTATTACCTTTCCTTTTGAATAAATTGTTATCTTGTCATTCCAGAATACTAGAGAATCCTCTCGCCATCC
1558	AGTAGTACTTTAAAGATCCTGTTAGAATTTAGAGGACTGAATTGTGTTCA	CCACAAAGGGCCGAGTTAAG	AGAGAATCCTCTCGCCATCC	CCACAAAGGGCCGAGTTAAGAGTAGTACTTTAAAGATCCTGTTAGAATTTAGAGGACTGAATTGTGTTCAAGAGAATCCTCTCGCCATCC
1559	CTTGACATCATATTTTGTTGTTTTACATCATGCATGGATTGATACGGTTT	CCACAAAGGGCCGAGTTAAG	AGAGAATCCTCTCGCCATCC	CCACAAAGGGCCGAGTTAAGCTTGACATCATATTTTGTTGTTTTACATCATGCATGGATTGATACGGTTTAGAGAATCCTCTCGCCATCC
1560	CCATCTTTGGCAACTAGAGCTTCTTGAGGGGCCTGCCTCAGAACATTTTC	CCACAAAGGGCCGAGTTAAG	AGAGAATCCTCTCGCCATCC	CCACAAAGGGCCGAGTTAAGCCATCTTTGGCAACTAGAGCTTCTTGAGGGGCCTGCCTCAGAACATTTTCAGAGAATCCTCTCGCCATCC
1561	GTAGAGGGTAAAGAAAACAGCGTTTTGACTGCTCTGGAGAGGCCGCGTTT	CCACAAAGGGCCGAGTTAAG	AGAGAATCCTCTCGCCATCC	CCACAAAGGGCCGAGTTAAGGTAGAGGGTAAAGAAAACAGCGTTTTGACTGCTCTGGAGAGGCCGCGTTTAGAGAATCCTCTCGCCATCC
1562	AAAAGGATTCACAGATAGAGAGAGAAGCGATTGAGAAGTGAGTTGGTTTC	CCACAAAGGGCCGAGTTAAG	AGAGAATCCTCTCGCCATCC	CCACAAAGGGCCGAGTTAAGAAAAGGATTCACAGATAGAGAGAGAAGCGATTGAGAAGTGAGTTGGTTTCAGAGAATCCTCTCGCCATCC
1563	TTATATAAACGAATTTAACCAAAAGGGCAGTAAAAGCGAGTAGAGTTCGG	CCACAAAGGGCCGAGTTAAG	AGAGAATCCTCTCGCCATCC	CCACAAAGGGCCGAGTTAAGTTATATAAACGAATTTAACCAAAAGGGCAGTAAAAGCGAGTAGAGTTCGGAGAGAATCCTCTCGCCATCC
1564	TGATCACTTTCTTTAGGTTAGTAAATTTGTTCAACGGTTTATTTGCTACA	CCACAAAGGGCCGAGTTAAG	AGAGAATCCTCTCGCCATCC	CCACAAAGGGCCGAGTTAAGTGATCACTTTCTTTAGGTTAGTAAATTTGTTCAACGGTTTATTTGCTACAAGAGAATCCTCTCGCCATCC
1565	ATTGTATCACTATTATCAAGATAAATATTAAGCATCAAAATATCAATAAT	CCACAAAGGGCCGAGTTAAG	AGAGAATCCTCTCGCCATCC	CCACAAAGGGCCGAGTTAAGATTGTATCACTATTATCAAGATAAATATTAAGCATCAAAATATCAATAATAGAGAATCCTCTCGCCATCC
1566	TCTTAGGACTCTTTGTAATAATTAAATCGAATGTTCAAAATGAAATTCTC	CCACAAAGGGCCGAGTTAAG	AGAGAATCCTCTCGCCATCC	CCACAAAGGGCCGAGTTAAGTCTTAGGACTCTTTGTAATAATTAAATCGAATGTTCAAAATGAAATTCTCAGAGAATCCTCTCGCCATCC
1567	TTTTCTCTTTATTCAATTTTGTCTAATTTTGTTCAATTTTCGTTGATGTT	CCACAAAGGGCCGAGTTAAG	AGAGAATCCTCTCGCCATCC	CCACAAAGGGCCGAGTTAAGTTTTCTCTTTATTCAATTTTGTCTAATTTTGTTCAATTTTCGTTGATGTTAGAGAATCCTCTCGCCATCC
1568	CTTTCAGAGTGCACATAATCAAATGGTCTAATGATATGCTCGCCATAAAA	CCACAAAGGGCCGAGTTAAG	AGAGAATCCTCTCGCCATCC	CCACAAAGGGCCGAGTTAAGCTTTCAGAGTGCACATAATCAAATGGTCTAATGATATGCTCGCCATAAAAAGAGAATCCTCTCGCCATCC
1569	ATATTATCGAGTTGTTTACCGGATATGTATTGAATAATAGTGATTATCTT	CCACAAAGGGCCGAGTTAAG	AGAGAATCCTCTCGCCATCC	CCACAAAGGGCCGAGTTAAGATATTATCGAGTTGTTTACCGGATATGTATTGAATAATAGTGATTATCTTAGAGAATCCTCTCGCCATCC
1570	AATAATAATAACTTTAGTATGATCTTGTGCGTCATCCAATATTCATGATC	CCACAAAGGGCCGAGTTAAG	AGAGAATCCTCTCGCCATCC	CCACAAAGGGCCGAGTTAAGAATAATAATAACTTTAGTATGATCTTGTGCGTCATCCAATATTCATGATCAGAGAATCCTCTCGCCATCC
1571	TCGCCATGAAAATTTAAATATAGAATATCTTATTATGAAAGATTCTCTTC	CCACAAAGGGCCGAGTTAAG	AGAGAATCCTCTCGCCATCC	CCACAAAGGGCCGAGTTAAGTCGCCATGAAAATTTAAATATAGAATATCTTATTATGAAAGATTCTCTTCAGAGAATCCTCTCGCCATCC
1572	ATTTTATCTCGATAATAGTAATATAATGACCAAATTCACCACAATCATAT	CCACAAAGGGCCGAGTTAAG	AGAGAATCCTCTCGCCATCC	CCACAAAGGGCCGAGTTAAGATTTTATCTCGATAATAGTAATATAATGACCAAATTCACCACAATCATATAGAGAATCCTCTCGCCATCC
1573	TCAAAGAAAGTGCGTTCGACCGGTATACTAACTTACCCTGCGCATCGATC	CCACAAAGGGCCGAGTTAAG	AGAGAATCCTCTCGCCATCC	CCACAAAGGGCCGAGTTAAGTCAAAGAAAGTGCGTTCGACCGGTATACTAACTTACCCTGCGCATCGATCAGAGAATCCTCTCGCCATCC
1574	TCATTTGATTTTACTTTTGACAGGTAAATTAGATTCAGAGATCCACGAGT	CCACAAAGGGCCGAGTTAAG	AGAGAATCCTCTCGCCATCC	CCACAAAGGGCCGAGTTAAGTCATTTGATTTTACTTTTGACAGGTAAATTAGATTCAGAGATCCACGAGTAGAGAATCCTCTCGCCATCC
1575	TATAACATCGTTTAACATCTAAAATGTGCATATATAATGATAGACTTATA	CCACAAAGGGCCGAGTTAAG	AGAGAATCCTCTCGCCATCC	CCACAAAGGGCCGAGTTAAGTATAACATCGTTTAACATCTAAAATGTGCATATATAATGATAGACTTATAAGAGAATCCTCTCGCCATCC
1576	CTGCACTATCCATCCGACCTTAATAGAGTACAAACTGGAACATCTATGTA	CCACAAAGGGCCGAGTTAAG	AGAGAATCCTCTCGCCATCC	CCACAAAGGGCCGAGTTAAGCTGCACTATCCATCCGACCTTAATAGAGTACAAACTGGAACATCTATGTAAGAGAATCCTCTCGCCATCC
1577	TAATAAATCTCAATCACTTATAACTCACGCTTTTAAAATTTTCAAGAGAT	CCACAAAGGGCCGAGTTAAG	AGAGAATCCTCTCGCCATCC	CCACAAAGGGCCGAGTTAAGTAATAAATCTCAATCACTTATAACTCACGCTTTTAAAATTTTCAAGAGATAGAGAATCCTCTCGCCATCC
1578	TCAACCTTGGAGTTTAATGTAGGAAAACCAAAACCAAATGTCTTATTTAC	CCACAAAGGGCCGAGTTAAG	AGAGAATCCTCTCGCCATCC	CCACAAAGGGCCGAGTTAAGTCAACCTTGGAGTTTAATGTAGGAAAACCAAAACCAAATGTCTTATTTACAGAGAATCCTCTCGCCATCC
1579	CCAACGAGAAATAACTTATCTTTGTCAACTTTACTTATTTCATGTTTATT	CCACAAAGGGCCGAGTTAAG	AGAGAATCCTCTCGCCATCC	CCACAAAGGGCCGAGTTAAGCCAACGAGAAATAACTTATCTTTGTCAACTTTACTTATTTCATGTTTATTAGAGAATCCTCTCGCCATCC
1580	TTTATAATATTTATATCATAAAGAATTAATAAGGTTGGTGTCTTATCTGT	CCACAAAGGGCCGAGTTAAG	AGAGAATCCTCTCGCCATCC	CCACAAAGGGCCGAGTTAAGTTTATAATATTTATATCATAAAGAATTAATAAGGTTGGTGTCTTATCTGTAGAGAATCCTCTCGCCATCC
1581	TTCTAAACATAGTAATCCATTCCCATAACAATATGAGTAGTCGAGTCACT	CCACAAAGGGCCGAGTTAAG	AGAGAATCCTCTCGCCATCC	CCACAAAGGGCCGAGTTAAGTTCTAAACATAGTAATCCATTCCCATAACAATATGAGTAGTCGAGTCACTAGAGAATCCTCTCGCCATCC
1582	AAAATATTTCCCCAATTTTCTCAAGATATCTTCATCTCCTAATTCAGAAT	CCACAAAGGGCCGAGTTAAG	AGAGAATCCTCTCGCCATCC	CCACAAAGGGCCGAGTTAAGAAAATATTTCCCCAATTTTCTCAAGATATCTTCATCTCCTAATTCAGAATAGAGAATCCTCTCGCCATCC
1583	TTGTAATAATATTTAGAGGTTTCAAATAAAACACTTAGAGACACATAATC	CCACAAAGGGCCGAGTTAAG	AGAGAATCCTCTCGCCATCC	CCACAAAGGGCCGAGTTAAGTTGTAATAATATTTAGAGGTTTCAAATAAAACACTTAGAGACACATAATCAGAGAATCCTCTCGCCATCC
1584	TCTAATCAAAGTGCCCTTTCAAATGAATATTCTTTTCCATGCATGTCCAA	CCACAAAGGGCCGAGTTAAG	AGAGAATCCTCTCGCCATCC	CCACAAAGGGCCGAGTTAAGTCTAATCAAAGTGCCCTTTCAAATGAATATTCTTTTCCATGCATGTCCAAAGAGAATCCTCTCGCCATCC
1585	TATGACAAGTGCTAAACAACCTTTCATTCATATTGCTGTCATGAAGTACA	CCACAAAGGGCCGAGTTAAG	AGAGAATCCTCTCGCCATCC	CCACAAAGGGCCGAGTTAAGTATGACAAGTGCTAAACAACCTTTCATTCATATTGCTGTCATGAAGTACAAGAGAATCCTCTCGCCATCC
1586	TATAGACAGATATTCTTATTATACATAATCTTTAAAGGACGAGAACACAC	CCACAAAGGGCCGAGTTAAG	AGAGAATCCTCTCGCCATCC	CCACAAAGGGCCGAGTTAAGTATAGACAGATATTCTTATTATACATAATCTTTAAAGGACGAGAACACACAGAGAATCCTCTCGCCATCC
1587	TAATATTGACCTTATCTAAGAACGGTTTGGTAGATGGTGATGTACAATTT	CCACAAAGGGCCGAGTTAAG	AGAGAATCCTCTCGCCATCC	CCACAAAGGGCCGAGTTAAGTAATATTGACCTTATCTAAGAACGGTTTGGTAGATGGTGATGTACAATTTAGAGAATCCTCTCGCCATCC
1588	GAAGATGTAAGTCATTTAGCATTTCCAATGAGACCAATATAAGAGAAGAG	CCACAAAGGGCCGAGTTAAG	AGAGAATCCTCTCGCCATCC	CCACAAAGGGCCGAGTTAAGGAAGATGTAAGTCATTTAGCATTTCCAATGAGACCAATATAAGAGAAGAGAGAGAATCCTCTCGCCATCC
1589	CAGTACCATATATCATAGTTTTATTCAAGCAAATATTCATCAGTATATTA	CCACAAAGGGCCGAGTTAAG	AGAGAATCCTCTCGCCATCC	CCACAAAGGGCCGAGTTAAGCAGTACCATATATCATAGTTTTATTCAAGCAAATATTCATCAGTATATTAAGAGAATCCTCTCGCCATCC
1590	AAGTATTTTCGTAAGTAACCAATAGAACCAGAAACCATAGTGATCTACCA	CCACAAAGGGCCGAGTTAAG	AGAGAATCCTCTCGCCATCC	CCACAAAGGGCCGAGTTAAGAAGTATTTTCGTAAGTAACCAATAGAACCAGAAACCATAGTGATCTACCAAGAGAATCCTCTCGCCATCC
1591	TATATATATATACGGAAACTCATAAAATGCGAAGTTAATCTGTCAACCAA	CCACAAAGGGCCGAGTTAAG	AGAGAATCCTCTCGCCATCC	CCACAAAGGGCCGAGTTAAGTATATATATATACGGAAACTCATAAAATGCGAAGTTAATCTGTCAACCAAAGAGAATCCTCTCGCCATCC
1592	ATCCCATTACCTTGGAAGATCTTGATCATGCCATATCACAGGTTAAACTG	CCACAAAGGGCCGAGTTAAG	AGAGAATCCTCTCGCCATCC	CCACAAAGGGCCGAGTTAAGATCCCATTACCTTGGAAGATCTTGATCATGCCATATCACAGGTTAAACTGAGAGAATCCTCTCGCCATCC
1593	TGAGTGAAGAAGATTTTGATGTCGAATTGGGCCGGCTTTTAGCGTTGCTG	CCACAAAGGGCCGAGTTAAG	AGAGAATCCTCTCGCCATCC	CCACAAAGGGCCGAGTTAAGTGAGTGAAGAAGATTTTGATGTCGAATTGGGCCGGCTTTTAGCGTTGCTGAGAGAATCCTCTCGCCATCC
1594	GTAAATGAAAATGATATGCTAGAGAAAACTATCCTTCATTATTCACACCT	CCACAAAGGGCCGAGTTAAG	AGAGAATCCTCTCGCCATCC	CCACAAAGGGCCGAGTTAAGGTAAATGAAAATGATATGCTAGAGAAAACTATCCTTCATTATTCACACCTAGAGAATCCTCTCGCCATCC
1595	TTATTTTCACACTTTTCTCCACAAGGTGTTTTGAAGTTAGACAAGTATAT	CCACAAAGGGCCGAGTTAAG	AGAGAATCCTCTCGCCATCC	CCACAAAGGGCCGAGTTAAGTTATTTTCACACTTTTCTCCACAAGGTGTTTTGAAGTTAGACAAGTATATAGAGAATCCTCTCGCCATCC
1596	CAAAGTCTAAGGGGAAAAGAAAGGGAAGATAGTTTAAGAATTTCGGCAGC	CCACAAAGGGCCGAGTTAAG	AGAGAATCCTCTCGCCATCC	CCACAAAGGGCCGAGTTAAGCAAAGTCTAAGGGGAAAAGAAAGGGAAGATAGTTTAAGAATTTCGGCAGCAGAGAATCCTCTCGCCATCC
1597	TATATATATATTCCACACTCTTTTATCCCATATTTATTTTGTGCCCTCAA	CCACAAAGGGCCGAGTTAAG	AGAGAATCCTCTCGCCATCC	CCACAAAGGGCCGAGTTAAGTATATATATATTCCACACTCTTTTATCCCATATTTATTTTGTGCCCTCAAAGAGAATCCTCTCGCCATCC
1598	AGATTAATTAACGCCAAGTTAGAGATGAGAGAATCTTATTATAATTAAGT	CCACAAAGGGCCGAGTTAAG	AGAGAATCCTCTCGCCATCC	CCACAAAGGGCCGAGTTAAGAGATTAATTAACGCCAAGTTAGAGATGAGAGAATCTTATTATAATTAAGTAGAGAATCCTCTCGCCATCC
1599	AGTTACTAAATCATTTACATGGGTGAAGAATTTTCAATCTTTATTTATAA	CCACAAAGGGCCGAGTTAAG	AGAGAATCCTCTCGCCATCC	CCACAAAGGGCCGAGTTAAGAGTTACTAAATCATTTACATGGGTGAAGAATTTTCAATCTTTATTTATAAAGAGAATCCTCTCGCCATCC
1600	TTCACTATGTGTCTAAGCTATGCATGAATTTGTCAATATATCTATCTATT	CCACAAAGGGCCGAGTTAAG	AGAGAATCCTCTCGCCATCC	CCACAAAGGGCCGAGTTAAGTTCACTATGTGTCTAAGCTATGCATGAATTTGTCAATATATCTATCTATTAGAGAATCCTCTCGCCATCC
1601	GCATTGAGTATAGGCAAGAACTTAGTTTATGGTGAGATATCAAACATATT	CCACAAAGGGCCGAGTTAAG	AGAGAATCCTCTCGCCATCC	CCACAAAGGGCCGAGTTAAGGCATTGAGTATAGGCAAGAACTTAGTTTATGGTGAGATATCAAACATATTAGAGAATCCTCTCGCCATCC
1602	CTACTGGGTTGGTTATTTTCCTTTAATGTTAAGACAATAAAACCTCATGT	CCACAAAGGGCCGAGTTAAG	AGAGAATCCTCTCGCCATCC	CCACAAAGGGCCGAGTTAAGCTACTGGGTTGGTTATTTTCCTTTAATGTTAAGACAATAAAACCTCATGTAGAGAATCCTCTCGCCATCC
1603	TTTATTATATATTGTAAATTGATTGAATATGTTCGTACTATAATAATAAC	CCACAAAGGGCCGAGTTAAG	AGAGAATCCTCTCGCCATCC	CCACAAAGGGCCGAGTTAAGTTTATTATATATTGTAAATTGATTGAATATGTTCGTACTATAATAATAACAGAGAATCCTCTCGCCATCC
1604	TATAGGAATATTAAAATGTTGGTAGAATTATTAATTTTGTAAAATGCTTA	CCACAAAGGGCCGAGTTAAG	AGAGAATCCTCTCGCCATCC	CCACAAAGGGCCGAGTTAAGTATAGGAATATTAAAATGTTGGTAGAATTATTAATTTTGTAAAATGCTTAAGAGAATCCTCTCGCCATCC
1605	GGAGGGAAAATACTCAATCTTTAACAACTTAGGTGAGCCGGAAATAACTA	CCACAAAGGGCCGAGTTAAG	AGAGAATCCTCTCGCCATCC	CCACAAAGGGCCGAGTTAAGGGAGGGAAAATACTCAATCTTTAACAACTTAGGTGAGCCGGAAATAACTAAGAGAATCCTCTCGCCATCC
1606	ATATATTTACGTATGCATATTTCTTGATTTTGCTTCTTTGTCATGCTTCA	CCACAAAGGGCCGAGTTAAG	AGAGAATCCTCTCGCCATCC	CCACAAAGGGCCGAGTTAAGATATATTTACGTATGCATATTTCTTGATTTTGCTTCTTTGTCATGCTTCAAGAGAATCCTCTCGCCATCC
1607	ATCTAAAGATCAGAGATTCTTCCAATAGGTATGAGATAGTGACAAAATAC	CCACAAAGGGCCGAGTTAAG	AGAGAATCCTCTCGCCATCC	CCACAAAGGGCCGAGTTAAGATCTAAAGATCAGAGATTCTTCCAATAGGTATGAGATAGTGACAAAATACAGAGAATCCTCTCGCCATCC
1608	TTAAGATGAGTGAATATGATATTCTTAATTTTACATATGAAAATATATAA	CCACAAAGGGCCGAGTTAAG	AGAGAATCCTCTCGCCATCC	CCACAAAGGGCCGAGTTAAGTTAAGATGAGTGAATATGATATTCTTAATTTTACATATGAAAATATATAAAGAGAATCCTCTCGCCATCC
1609	TCATCTCCAAAATTTGAGATATATAATAATTGACTTATGCTAAATTGATT	CCACAAAGGGCCGAGTTAAG	AGAGAATCCTCTCGCCATCC	CCACAAAGGGCCGAGTTAAGTCATCTCCAAAATTTGAGATATATAATAATTGACTTATGCTAAATTGATTAGAGAATCCTCTCGCCATCC
1610	TGTAGATGTCACTAGACTTATAATCACATCCTAGGATCACAAATTCGGGA	CCACAAAGGGCCGAGTTAAG	AGAGAATCCTCTCGCCATCC	CCACAAAGGGCCGAGTTAAGTGTAGATGTCACTAGACTTATAATCACATCCTAGGATCACAAATTCGGGAAGAGAATCCTCTCGCCATCC
1611	TTTAAAATTTGCACTTAAGTTTCGTTATCTATTCCTTCTAATTAATCACA	CCACAAAGGGCCGAGTTAAG	AGAGAATCCTCTCGCCATCC	CCACAAAGGGCCGAGTTAAGTTTAAAATTTGCACTTAAGTTTCGTTATCTATTCCTTCTAATTAATCACAAGAGAATCCTCTCGCCATCC
1612	AGACCGAGACAAGCAGTTCCACCACTTCGCTCCCCAACCCTCATTTGTGT	CCACAAAGGGCCGAGTTAAG	AGAGAATCCTCTCGCCATCC	CCACAAAGGGCCGAGTTAAGAGACCGAGACAAGCAGTTCCACCACTTCGCTCCCCAACCCTCATTTGTGTAGAGAATCCTCTCGCCATCC
1613	TCCAAGGTCCAACTAAAGAATTGTCAATTTAAACTCTATTGAAACATGCT	CCACAAAGGGCCGAGTTAAG	AGAGAATCCTCTCGCCATCC	CCACAAAGGGCCGAGTTAAGTCCAAGGTCCAACTAAAGAATTGTCAATTTAAACTCTATTGAAACATGCTAGAGAATCCTCTCGCCATCC
1614	CACCAAGAAGATCTTTAATCTCTATTCTGACCAAACACTGCCACTCTTTC	CCACAAAGGGCCGAGTTAAG	AGAGAATCCTCTCGCCATCC	CCACAAAGGGCCGAGTTAAGCACCAAGAAGATCTTTAATCTCTATTCTGACCAAACACTGCCACTCTTTCAGAGAATCCTCTCGCCATCC
1615	TGGGAGAGGGAGCAGCAATTTCAGATATCAGAGTGGTGGCAGAAGAAGCA	CCACAAAGGGCCGAGTTAAG	AGAGAATCCTCTCGCCATCC	CCACAAAGGGCCGAGTTAAGTGGGAGAGGGAGCAGCAATTTCAGATATCAGAGTGGTGGCAGAAGAAGCAAGAGAATCCTCTCGCCATCC
1616	AAAATCTTTTACTATAGTTAATGGGATTCTTCTGCTTTTGTTGTTGTTGT	CCACAAAGGGCCGAGTTAAG	AGAGAATCCTCTCGCCATCC	CCACAAAGGGCCGAGTTAAGAAAATCTTTTACTATAGTTAATGGGATTCTTCTGCTTTTGTTGTTGTTGTAGAGAATCCTCTCGCCATCC
1617	TTCCCGCAATCTCGCATGTTCGGATTCTTGATTTTGGGTTGATGAAGAAG	CCACAAAGGGCCGAGTTAAG	AGAGAATCCTCTCGCCATCC	CCACAAAGGGCCGAGTTAAGTTCCCGCAATCTCGCATGTTCGGATTCTTGATTTTGGGTTGATGAAGAAGAGAGAATCCTCTCGCCATCC
1618	TGGAAATCACCAGAATCCCCAGCAGCAGCATCTTAGTATCCACCACGGTG	CCACAAAGGGCCGAGTTAAG	AGAGAATCCTCTCGCCATCC	CCACAAAGGGCCGAGTTAAGTGGAAATCACCAGAATCCCCAGCAGCAGCATCTTAGTATCCACCACGGTGAGAGAATCCTCTCGCCATCC
1619	TTGACAGCAAATCTGGCGGTGGAAAACTCTGAAACTGCATAGGCGAAGAG	CCACAAAGGGCCGAGTTAAG	AGAGAATCCTCTCGCCATCC	CCACAAAGGGCCGAGTTAAGTTGACAGCAAATCTGGCGGTGGAAAACTCTGAAACTGCATAGGCGAAGAGAGAGAATCCTCTCGCCATCC
1620	TGAATTTAGAAACTGAACTATTTGCAGAACCCTAGTTATTCTCTTGATTC	CCACAAAGGGCCGAGTTAAG	AGAGAATCCTCTCGCCATCC	CCACAAAGGGCCGAGTTAAGTGAATTTAGAAACTGAACTATTTGCAGAACCCTAGTTATTCTCTTGATTCAGAGAATCCTCTCGCCATCC
1621	ATACAGCACAGGGAAGAAGCAGCAGTTAAGAGAGAAAGGGCAATGGCATA	CCACAAAGGGCCGAGTTAAG	AGAGAATCCTCTCGCCATCC	CCACAAAGGGCCGAGTTAAGATACAGCACAGGGAAGAAGCAGCAGTTAAGAGAGAAAGGGCAATGGCATAAGAGAATCCTCTCGCCATCC
1622	TTTCACCTTGGGTTGAAATATGGGAATCTAACTTAGCATGCAATTATGAG	CCACAAAGGGCCGAGTTAAG	AGAGAATCCTCTCGCCATCC	CCACAAAGGGCCGAGTTAAGTTTCACCTTGGGTTGAAATATGGGAATCTAACTTAGCATGCAATTATGAGAGAGAATCCTCTCGCCATCC
1623	ACGCACTGCACTCTTCCCCTTATAAGTTTTAGATTTCTGTATTCTAACAT	CCACAAAGGGCCGAGTTAAG	AGAGAATCCTCTCGCCATCC	CCACAAAGGGCCGAGTTAAGACGCACTGCACTCTTCCCCTTATAAGTTTTAGATTTCTGTATTCTAACATAGAGAATCCTCTCGCCATCC
1624	AAATTCAAAGGACCTGTGAGGGCTTCTCTTACAATCTGGTTTGCACTGCA	CCACAAAGGGCCGAGTTAAG	AGAGAATCCTCTCGCCATCC	CCACAAAGGGCCGAGTTAAGAAATTCAAAGGACCTGTGAGGGCTTCTCTTACAATCTGGTTTGCACTGCAAGAGAATCCTCTCGCCATCC
1625	CTATTAGCTAAACTGTTGTGGAAATTGGTGCATCAAAGAGGGAGCATTAG	CCACAAAGGGCCGAGTTAAG	AGAGAATCCTCTCGCCATCC	CCACAAAGGGCCGAGTTAAGCTATTAGCTAAACTGTTGTGGAAATTGGTGCATCAAAGAGGGAGCATTAGAGAGAATCCTCTCGCCATCC
1626	GAGGTTGGTCTCCTATGAAATAACGGGACACCCAAATAGCTACCAAGATC	CCACAAAGGGCCGAGTTAAG	AGAGAATCCTCTCGCCATCC	CCACAAAGGGCCGAGTTAAGGAGGTTGGTCTCCTATGAAATAACGGGACACCCAAATAGCTACCAAGATCAGAGAATCCTCTCGCCATCC
1627	GTTTAAGACGGTTAGCCAAAATATTTGAAACCAATTTGACTAGAACATTA	CCACAAAGGGCCGAGTTAAG	AGAGAATCCTCTCGCCATCC	CCACAAAGGGCCGAGTTAAGGTTTAAGACGGTTAGCCAAAATATTTGAAACCAATTTGACTAGAACATTAAGAGAATCCTCTCGCCATCC
1628	AATGTCCACTCAGCTGGTTGTGAAGGTAGGCACGGTTCTTTGGTATATAG	CCACAAAGGGCCGAGTTAAG	AGAGAATCCTCTCGCCATCC	CCACAAAGGGCCGAGTTAAGAATGTCCACTCAGCTGGTTGTGAAGGTAGGCACGGTTCTTTGGTATATAGAGAGAATCCTCTCGCCATCC
1629	TACCCGATCAAGAGTCCACACCTAAGTTGAACATTGAAGGTCGACATCAA	CCACAAAGGGCCGAGTTAAG	AGAGAATCCTCTCGCCATCC	CCACAAAGGGCCGAGTTAAGTACCCGATCAAGAGTCCACACCTAAGTTGAACATTGAAGGTCGACATCAAAGAGAATCCTCTCGCCATCC
1630	CCACCTCCTGATCGTCCATTAAATCCTCCAAAATTTCAAATCTACTACCT	CCACAAAGGGCCGAGTTAAG	AGAGAATCCTCTCGCCATCC	CCACAAAGGGCCGAGTTAAGCCACCTCCTGATCGTCCATTAAATCCTCCAAAATTTCAAATCTACTACCTAGAGAATCCTCTCGCCATCC
1631	CTCCAGGTTTGCAATTGTGATTTCAGATCCTCCAATGCAGCAATCAGTCG	CCACAAAGGGCCGAGTTAAG	AGAGAATCCTCTCGCCATCC	CCACAAAGGGCCGAGTTAAGCTCCAGGTTTGCAATTGTGATTTCAGATCCTCCAATGCAGCAATCAGTCGAGAGAATCCTCTCGCCATCC
1632	TCTGCAAGATCTAACCTATCCACAACCTCCTGAAATAGTTGCATCTGACA	CCACAAAGGGCCGAGTTAAG	AGAGAATCCTCTCGCCATCC	CCACAAAGGGCCGAGTTAAGTCTGCAAGATCTAACCTATCCACAACCTCCTGAAATAGTTGCATCTGACAAGAGAATCCTCTCGCCATCC
1633	GTAAGAACAAAATCAACAACATCTTGCGTACCGAAGAAAGCCTGAAAGTA	CCACAAAGGGCCGAGTTAAG	AGAGAATCCTCTCGCCATCC	CCACAAAGGGCCGAGTTAAGGTAAGAACAAAATCAACAACATCTTGCGTACCGAAGAAAGCCTGAAAGTAAGAGAATCCTCTCGCCATCC
1634	CAACGGTCCGAATCTTGACAAATAAGACGATGAAAATATTTTAGGACCGA	CCACAAAGGGCCGAGTTAAG	AGAGAATCCTCTCGCCATCC	CCACAAAGGGCCGAGTTAAGCAACGGTCCGAATCTTGACAAATAAGACGATGAAAATATTTTAGGACCGAAGAGAATCCTCTCGCCATCC
1635	CTAGGAAGGAAAATAGGAGGAGTGGAGCGAGGATTTGGGCGAGAAATTAG	CCACAAAGGGCCGAGTTAAG	AGAGAATCCTCTCGCCATCC	CCACAAAGGGCCGAGTTAAGCTAGGAAGGAAAATAGGAGGAGTGGAGCGAGGATTTGGGCGAGAAATTAGAGAGAATCCTCTCGCCATCC
1636	TGCTTTTCACTTCAAATGCCCTTCGACCTATGTTGCTCCTACATCTAGAT	CCACAAAGGGCCGAGTTAAG	AGAGAATCCTCTCGCCATCC	CCACAAAGGGCCGAGTTAAGTGCTTTTCACTTCAAATGCCCTTCGACCTATGTTGCTCCTACATCTAGATAGAGAATCCTCTCGCCATCC
1637	GAGCTTCGAGTCAATAAAAGATAGGATTGATTAGTATAATATTGTAAGCT	CCACAAAGGGCCGAGTTAAG	AGAGAATCCTCTCGCCATCC	CCACAAAGGGCCGAGTTAAGGAGCTTCGAGTCAATAAAAGATAGGATTGATTAGTATAATATTGTAAGCTAGAGAATCCTCTCGCCATCC
1638	AACAGACCTTCATGACAAAGACACAGCCTAGCAGGGTTCATTTAAAACAA	CCACAAAGGGCCGAGTTAAG	AGAGAATCCTCTCGCCATCC	CCACAAAGGGCCGAGTTAAGAACAGACCTTCATGACAAAGACACAGCCTAGCAGGGTTCATTTAAAACAAAGAGAATCCTCTCGCCATCC
1639	AACAGTTTCTTTCCAGTTCTCCGCAAAATAGATGATAATAAAGCCCTAAA	CCACAAAGGGCCGAGTTAAG	AGAGAATCCTCTCGCCATCC	CCACAAAGGGCCGAGTTAAGAACAGTTTCTTTCCAGTTCTCCGCAAAATAGATGATAATAAAGCCCTAAAAGAGAATCCTCTCGCCATCC
1640	GATACAATAGATGAGAATCAGGATGGGCATTTATCACATTCTGAATTAAG	CCACAAAGGGCCGAGTTAAG	AGAGAATCCTCTCGCCATCC	CCACAAAGGGCCGAGTTAAGGATACAATAGATGAGAATCAGGATGGGCATTTATCACATTCTGAATTAAGAGAGAATCCTCTCGCCATCC
1641	AAAGGCAATAGGAAATCAGAAGTGAAACAGAGATAATTAGAGCAATTAAC	CCACAAAGGGCCGAGTTAAG	AGAGAATCCTCTCGCCATCC	CCACAAAGGGCCGAGTTAAGAAAGGCAATAGGAAATCAGAAGTGAAACAGAGATAATTAGAGCAATTAACAGAGAATCCTCTCGCCATCC
1642	TACATAAATAATAGGTCAAAAGTATACACAGCATAAAATAAATCAAGAAG	CCACAAAGGGCCGAGTTAAG	AGAGAATCCTCTCGCCATCC	CCACAAAGGGCCGAGTTAAGTACATAAATAATAGGTCAAAAGTATACACAGCATAAAATAAATCAAGAAGAGAGAATCCTCTCGCCATCC
1643	GTCTTCCCAACAAATCCTCTCTCTAATCGTACACTCTGTCTTTGTTTCAC	CCACAAAGGGCCGAGTTAAG	AGAGAATCCTCTCGCCATCC	CCACAAAGGGCCGAGTTAAGGTCTTCCCAACAAATCCTCTCTCTAATCGTACACTCTGTCTTTGTTTCACAGAGAATCCTCTCGCCATCC
1644	AAACATAATACAATTTCTCAATAAGTTATTTAAAATAACAATTCTTTGGA	CCACAAAGGGCCGAGTTAAG	AGAGAATCCTCTCGCCATCC	CCACAAAGGGCCGAGTTAAGAAACATAATACAATTTCTCAATAAGTTATTTAAAATAACAATTCTTTGGAAGAGAATCCTCTCGCCATCC
1645	CTTTCAATTTTAATTCAAGTTTAACATTTAAGTTTTAGCCATATTAAAGT	CCACAAAGGGCCGAGTTAAG	AGAGAATCCTCTCGCCATCC	CCACAAAGGGCCGAGTTAAGCTTTCAATTTTAATTCAAGTTTAACATTTAAGTTTTAGCCATATTAAAGTAGAGAATCCTCTCGCCATCC
1646	GATTTATTAATATCACACGTTATTCATAATTAACTATAAAACTAAAATTC	CCACAAAGGGCCGAGTTAAG	AGAGAATCCTCTCGCCATCC	CCACAAAGGGCCGAGTTAAGGATTTATTAATATCACACGTTATTCATAATTAACTATAAAACTAAAATTCAGAGAATCCTCTCGCCATCC
1647	TAAAATGAGTTTAATATGATATAGTAGATCTAATATATAGTATTCATATT	CCACAAAGGGCCGAGTTAAG	AGAGAATCCTCTCGCCATCC	CCACAAAGGGCCGAGTTAAGTAAAATGAGTTTAATATGATATAGTAGATCTAATATATAGTATTCATATTAGAGAATCCTCTCGCCATCC
1648	TCTTTAATCAAATTTCAAGACCAATATATGTCATATTATCAAGGAATTGA	CCACAAAGGGCCGAGTTAAG	AGAGAATCCTCTCGCCATCC	CCACAAAGGGCCGAGTTAAGTCTTTAATCAAATTTCAAGACCAATATATGTCATATTATCAAGGAATTGAAGAGAATCCTCTCGCCATCC
1649	TAATTAGATTAGGTTTATGTAATTATTAAATGGATTAGATTTTGGTTAAA	CCACAAAGGGCCGAGTTAAG	AGAGAATCCTCTCGCCATCC	CCACAAAGGGCCGAGTTAAGTAATTAGATTAGGTTTATGTAATTATTAAATGGATTAGATTTTGGTTAAAAGAGAATCCTCTCGCCATCC
1650	AATTCCAACCACATCATTTCTAATTACATATGCCATAAAATAATAAATTT	CCACAAAGGGCCGAGTTAAG	AGAGAATCCTCTCGCCATCC	CCACAAAGGGCCGAGTTAAGAATTCCAACCACATCATTTCTAATTACATATGCCATAAAATAATAAATTTAGAGAATCCTCTCGCCATCC
1651	AATATATAGGAATAATTACTTATTATCAACTGAAATAACTAATAAATAAA	CCACAAAGGGCCGAGTTAAG	AGAGAATCCTCTCGCCATCC	CCACAAAGGGCCGAGTTAAGAATATATAGGAATAATTACTTATTATCAACTGAAATAACTAATAAATAAAAGAGAATCCTCTCGCCATCC
1652	AGATAAAATCAAGAGACTAATATTATTTCTTCAAATTATATTGACTTACA	CCACAAAGGGCCGAGTTAAG	AGAGAATCCTCTCGCCATCC	CCACAAAGGGCCGAGTTAAGAGATAAAATCAAGAGACTAATATTATTTCTTCAAATTATATTGACTTACAAGAGAATCCTCTCGCCATCC
1653	TTCCTTTTCTACTAATGGAATTATTATACCTCTTCTCCACCATGCCCTGC	CCACAAAGGGCCGAGTTAAG	AGAGAATCCTCTCGCCATCC	CCACAAAGGGCCGAGTTAAGTTCCTTTTCTACTAATGGAATTATTATACCTCTTCTCCACCATGCCCTGCAGAGAATCCTCTCGCCATCC
1654	GAAGCTCTGACGAAGTAAAGGGTGGTGAAACGGGAATCAGATTGCTTATC	CCACAAAGGGCCGAGTTAAG	AGAGAATCCTCTCGCCATCC	CCACAAAGGGCCGAGTTAAGGAAGCTCTGACGAAGTAAAGGGTGGTGAAACGGGAATCAGATTGCTTATCAGAGAATCCTCTCGCCATCC
1655	TCTCCTTTGGTTTCTGACATAGATGAAGCACTGATGAAGGTATTCGAAGG	CCACAAAGGGCCGAGTTAAG	AGAGAATCCTCTCGCCATCC	CCACAAAGGGCCGAGTTAAGTCTCCTTTGGTTTCTGACATAGATGAAGCACTGATGAAGGTATTCGAAGGAGAGAATCCTCTCGCCATCC
1656	GACCATGCCATGAACGATTTTATGCGGCAATTTCATCTAAAATGTTGTAG	CCACAAAGGGCCGAGTTAAG	AGAGAATCCTCTCGCCATCC	CCACAAAGGGCCGAGTTAAGGACCATGCCATGAACGATTTTATGCGGCAATTTCATCTAAAATGTTGTAGAGAGAATCCTCTCGCCATCC
1657	AAATATCAGAATCACCAAAAGAAGAAGAATTATATGTTAATTAAAAGGAA	CCACAAAGGGCCGAGTTAAG	AGAGAATCCTCTCGCCATCC	CCACAAAGGGCCGAGTTAAGAAATATCAGAATCACCAAAAGAAGAAGAATTATATGTTAATTAAAAGGAAAGAGAATCCTCTCGCCATCC
1658	TTGTGAAAAGCTGGCTGATTAATTCTATGGAACCATCTTTGATAGGAAAT	CCACAAAGGGCCGAGTTAAG	AGAGAATCCTCTCGCCATCC	CCACAAAGGGCCGAGTTAAGTTGTGAAAAGCTGGCTGATTAATTCTATGGAACCATCTTTGATAGGAAATAGAGAATCCTCTCGCCATCC
1659	TAATCCTTGTAGATTATTGTAGTATATTTCCAGTGATCCACCTGCTTGTC	CCACAAAGGGCCGAGTTAAG	AGAGAATCCTCTCGCCATCC	CCACAAAGGGCCGAGTTAAGTAATCCTTGTAGATTATTGTAGTATATTTCCAGTGATCCACCTGCTTGTCAGAGAATCCTCTCGCCATCC
1660	TGGATGGTTTGGATGATCAATTGGATGGTATTAGGAAAGATATACTACAG	CCACAAAGGGCCGAGTTAAG	AGAGAATCCTCTCGCCATCC	CCACAAAGGGCCGAGTTAAGTGGATGGTTTGGATGATCAATTGGATGGTATTAGGAAAGATATACTACAGAGAGAATCCTCTCGCCATCC
1661	CATAGATGGTTTGTGAGATTCATTGATGACTGCACAAGAATGACATGGTT	CCACAAAGGGCCGAGTTAAG	AGAGAATCCTCTCGCCATCC	CCACAAAGGGCCGAGTTAAGCATAGATGGTTTGTGAGATTCATTGATGACTGCACAAGAATGACATGGTTAGAGAATCCTCTCGCCATCC
1662	GTTGATAATGCTTGAAGAGGAGTCTGCATCTGAAGTACTCTTGATGACAT	CCACAAAGGGCCGAGTTAAG	AGAGAATCCTCTCGCCATCC	CCACAAAGGGCCGAGTTAAGGTTGATAATGCTTGAAGAGGAGTCTGCATCTGAAGTACTCTTGATGACATAGAGAATCCTCTCGCCATCC
1663	GAAAGGGAGATGAACCTATTTTGTGATAACAAGGCAGCAATTGATATCTC	CCACAAAGGGCCGAGTTAAG	AGAGAATCCTCTCGCCATCC	CCACAAAGGGCCGAGTTAAGGAAAGGGAGATGAACCTATTTTGTGATAACAAGGCAGCAATTGATATCTCAGAGAATCCTCTCGCCATCC
1664	TCGCATTTCAGTTCAAGGGCACTAGAAATAATGGGTCTAATTCTTTATCG	CCACAAAGGGCCGAGTTAAG	AGAGAATCCTCTCGCCATCC	CCACAAAGGGCCGAGTTAAGTCGCATTTCAGTTCAAGGGCACTAGAAATAATGGGTCTAATTCTTTATCGAGAGAATCCTCTCGCCATCC
1665	ATCTCAATCCCAAAACTCCTGTACTAATATCTATCACCCTCCATTTTCAT	CCACAAAGGGCCGAGTTAAG	AGAGAATCCTCTCGCCATCC	CCACAAAGGGCCGAGTTAAGATCTCAATCCCAAAACTCCTGTACTAATATCTATCACCCTCCATTTTCATAGAGAATCCTCTCGCCATCC
1666	TGAAATCGGGATCTATATTCAAATAAGAATGAAACAAGACTGGAGGGCCT	CCACAAAGGGCCGAGTTAAG	AGAGAATCCTCTCGCCATCC	CCACAAAGGGCCGAGTTAAGTGAAATCGGGATCTATATTCAAATAAGAATGAAACAAGACTGGAGGGCCTAGAGAATCCTCTCGCCATCC
1667	AATATGATTCAAATAGGTGATCTAATTTTATAAACATAGCTAGAGACAAC	CCACAAAGGGCCGAGTTAAG	AGAGAATCCTCTCGCCATCC	CCACAAAGGGCCGAGTTAAGAATATGATTCAAATAGGTGATCTAATTTTATAAACATAGCTAGAGACAACAGAGAATCCTCTCGCCATCC
1668	CGTTTGAGTAAAGTAGATCTCTTATTGAAAGTAAGTTTAAATTTCTGCAT	CCACAAAGGGCCGAGTTAAG	AGAGAATCCTCTCGCCATCC	CCACAAAGGGCCGAGTTAAGCGTTTGAGTAAAGTAGATCTCTTATTGAAAGTAAGTTTAAATTTCTGCATAGAGAATCCTCTCGCCATCC
1669	GCATAGTAATCTTGTATATGCCCGACCTTAATTTCATTCCCTTCTTATAG	CCACAAAGGGCCGAGTTAAG	AGAGAATCCTCTCGCCATCC	CCACAAAGGGCCGAGTTAAGGCATAGTAATCTTGTATATGCCCGACCTTAATTTCATTCCCTTCTTATAGAGAGAATCCTCTCGCCATCC
1670	GTCCAATCACCACCAGCTCCATTATCAAACTTTAACAAGAATGGTACAGA	CCACAAAGGGCCGAGTTAAG	AGAGAATCCTCTCGCCATCC	CCACAAAGGGCCGAGTTAAGGTCCAATCACCACCAGCTCCATTATCAAACTTTAACAAGAATGGTACAGAAGAGAATCCTCTCGCCATCC
1671	TTGTAGATCCAAAGAGAATTAAAAGGTGAGAATTCCTGAAATTTCCCTTT	CCACAAAGGGCCGAGTTAAG	AGAGAATCCTCTCGCCATCC	CCACAAAGGGCCGAGTTAAGTTGTAGATCCAAAGAGAATTAAAAGGTGAGAATTCCTGAAATTTCCCTTTAGAGAATCCTCTCGCCATCC
1672	ATTGCTGAAGATTGTGTATACCATAAATTCAGTGTGTGTTAATTCATATT	CCACAAAGGGCCGAGTTAAG	AGAGAATCCTCTCGCCATCC	CCACAAAGGGCCGAGTTAAGATTGCTGAAGATTGTGTATACCATAAATTCAGTGTGTGTTAATTCATATTAGAGAATCCTCTCGCCATCC
1673	CTCAAAGGAAAATCTATGATGAGAGGTAGTATGAAATAACTTCTCATGAA	CCACAAAGGGCCGAGTTAAG	AGAGAATCCTCTCGCCATCC	CCACAAAGGGCCGAGTTAAGCTCAAAGGAAAATCTATGATGAGAGGTAGTATGAAATAACTTCTCATGAAAGAGAATCCTCTCGCCATCC
1674	TCTATCCGTTGACTATGATAAATTAACCTCGTCCTTCTGGGGAGTGAAAT	CCACAAAGGGCCGAGTTAAG	AGAGAATCCTCTCGCCATCC	CCACAAAGGGCCGAGTTAAGTCTATCCGTTGACTATGATAAATTAACCTCGTCCTTCTGGGGAGTGAAATAGAGAATCCTCTCGCCATCC
1675	GCACATAGAAGCTCTACTCCAAGAATAATAATATGAGGAACCACACCAAT	CCACAAAGGGCCGAGTTAAG	AGAGAATCCTCTCGCCATCC	CCACAAAGGGCCGAGTTAAGGCACATAGAAGCTCTACTCCAAGAATAATAATATGAGGAACCACACCAATAGAGAATCCTCTCGCCATCC
1676	ACACTTGCGATTCTCTATGTTTGCCCTTCTTTAGTATTATTTTGATTCCA	CCACAAAGGGCCGAGTTAAG	AGAGAATCCTCTCGCCATCC	CCACAAAGGGCCGAGTTAAGACACTTGCGATTCTCTATGTTTGCCCTTCTTTAGTATTATTTTGATTCCAAGAGAATCCTCTCGCCATCC
1677	TGCTCCAACATTTTCCTACAAAGATTCTTAACCTAATTAATAACCTAATC	CCACAAAGGGCCGAGTTAAG	AGAGAATCCTCTCGCCATCC	CCACAAAGGGCCGAGTTAAGTGCTCCAACATTTTCCTACAAAGATTCTTAACCTAATTAATAACCTAATCAGAGAATCCTCTCGCCATCC
1678	ACCCTACTCTTTTATTTCTCCCTCAAATCATTGCAATGTTTTAACCATTT	CCACAAAGGGCCGAGTTAAG	AGAGAATCCTCTCGCCATCC	CCACAAAGGGCCGAGTTAAGACCCTACTCTTTTATTTCTCCCTCAAATCATTGCAATGTTTTAACCATTTAGAGAATCCTCTCGCCATCC
1679	AACAGACAGACAGATTGTACCATAAATCTTGTAGGAATTGACATTGTACA	CCACAAAGGGCCGAGTTAAG	AGAGAATCCTCTCGCCATCC	CCACAAAGGGCCGAGTTAAGAACAGACAGACAGATTGTACCATAAATCTTGTAGGAATTGACATTGTACAAGAGAATCCTCTCGCCATCC
1680	TGTTGTTTGTCTCTCTTATCTTTACTAATAATATTTAACTACATTTAAAA	CCACAAAGGGCCGAGTTAAG	AGAGAATCCTCTCGCCATCC	CCACAAAGGGCCGAGTTAAGTGTTGTTTGTCTCTCTTATCTTTACTAATAATATTTAACTACATTTAAAAAGAGAATCCTCTCGCCATCC
1681	AACTTGACACCTATAACAAAGATATTGATGGGTATTCTTGATTTCTAGCT	CCACAAAGGGCCGAGTTAAG	AGAGAATCCTCTCGCCATCC	CCACAAAGGGCCGAGTTAAGAACTTGACACCTATAACAAAGATATTGATGGGTATTCTTGATTTCTAGCTAGAGAATCCTCTCGCCATCC
1682	CTTGAGAAGCTGAACAACTGATGGAAGAATTTGCCGAGAATCTTGTGGTG	CCACAAAGGGCCGAGTTAAG	AGAGAATCCTCTCGCCATCC	CCACAAAGGGCCGAGTTAAGCTTGAGAAGCTGAACAACTGATGGAAGAATTTGCCGAGAATCTTGTGGTGAGAGAATCCTCTCGCCATCC
1683	TTCCACTTTTAGTATTTTAACCCAGCAAAACTATATCATACTGTGGTTAA	CCACAAAGGGCCGAGTTAAG	AGAGAATCCTCTCGCCATCC	CCACAAAGGGCCGAGTTAAGTTCCACTTTTAGTATTTTAACCCAGCAAAACTATATCATACTGTGGTTAAAGAGAATCCTCTCGCCATCC
1684	GCCATCCGCAAGCAAGATATGAATCTATCAATGTGGTCACCATCAGAAAC	CCACAAAGGGCCGAGTTAAG	AGAGAATCCTCTCGCCATCC	CCACAAAGGGCCGAGTTAAGGCCATCCGCAAGCAAGATATGAATCTATCAATGTGGTCACCATCAGAAACAGAGAATCCTCTCGCCATCC
1685	TGAATCTTGTGGGAGACTGATTGATTTGTTGTGTTACTTTGCATTTAGGC	CCACAAAGGGCCGAGTTAAG	AGAGAATCCTCTCGCCATCC	CCACAAAGGGCCGAGTTAAGTGAATCTTGTGGGAGACTGATTGATTTGTTGTGTTACTTTGCATTTAGGCAGAGAATCCTCTCGCCATCC
1686	AATACATACAATCATTCATATGCAGAACAGTATCCCGTCAAGCAAAGAAA	CCACAAAGGGCCGAGTTAAG	AGAGAATCCTCTCGCCATCC	CCACAAAGGGCCGAGTTAAGAATACATACAATCATTCATATGCAGAACAGTATCCCGTCAAGCAAAGAAAAGAGAATCCTCTCGCCATCC
1687	CATAATTGAAACTACACTTTATTGCAATTTGTTCATACCTTAAAATTTTC	CCACAAAGGGCCGAGTTAAG	AGAGAATCCTCTCGCCATCC	CCACAAAGGGCCGAGTTAAGCATAATTGAAACTACACTTTATTGCAATTTGTTCATACCTTAAAATTTTCAGAGAATCCTCTCGCCATCC
1688	AAGCTCTCAAGATTGCCGCTGAACTTAGACTGGAGAAAGTTTACTTTGAA	CCACAAAGGGCCGAGTTAAG	AGAGAATCCTCTCGCCATCC	CCACAAAGGGCCGAGTTAAGAAGCTCTCAAGATTGCCGCTGAACTTAGACTGGAGAAAGTTTACTTTGAAAGAGAATCCTCTCGCCATCC
1689	ATTTGCATCCATCATCTTCTGTATTGCACTTGATCTAGAAATCCATTTTG	CCACAAAGGGCCGAGTTAAG	AGAGAATCCTCTCGCCATCC	CCACAAAGGGCCGAGTTAAGATTTGCATCCATCATCTTCTGTATTGCACTTGATCTAGAAATCCATTTTGAGAGAATCCTCTCGCCATCC
1690	GAGGTATGACAACAATCTCACCAGGAACTACGAGTAATCTTCCACATTCC	CCACAAAGGGCCGAGTTAAG	AGAGAATCCTCTCGCCATCC	CCACAAAGGGCCGAGTTAAGGAGGTATGACAACAATCTCACCAGGAACTACGAGTAATCTTCCACATTCCAGAGAATCCTCTCGCCATCC
1691	CTGCCAGCGCCGCATACAGTGTACAGACCATCTATGAAATCAGTAGGTGT	CCACAAAGGGCCGAGTTAAG	AGAGAATCCTCTCGCCATCC	CCACAAAGGGCCGAGTTAAGCTGCCAGCGCCGCATACAGTGTACAGACCATCTATGAAATCAGTAGGTGTAGAGAATCCTCTCGCCATCC
1692	CATGCAGTTCAATTTCTGTCTTCTGTACTGTTTGTTGCTTCATAAAGATG	CCACAAAGGGCCGAGTTAAG	AGAGAATCCTCTCGCCATCC	CCACAAAGGGCCGAGTTAAGCATGCAGTTCAATTTCTGTCTTCTGTACTGTTTGTTGCTTCATAAAGATGAGAGAATCCTCTCGCCATCC
1693	CTAAATTCAACACATGTCAGAGATAGTTTTATGCCTCCAATTTTAATTAT	CCACAAAGGGCCGAGTTAAG	AGAGAATCCTCTCGCCATCC	CCACAAAGGGCCGAGTTAAGCTAAATTCAACACATGTCAGAGATAGTTTTATGCCTCCAATTTTAATTATAGAGAATCCTCTCGCCATCC
1694	ATTGACGAAAATATGCCTAAAGAAGAACCAAATTGACTTATTTTCCATTT	CCACAAAGGGCCGAGTTAAG	AGAGAATCCTCTCGCCATCC	CCACAAAGGGCCGAGTTAAGATTGACGAAAATATGCCTAAAGAAGAACCAAATTGACTTATTTTCCATTTAGAGAATCCTCTCGCCATCC
1695	TTTGTACTATAAGATACTCACCAGGACAGCCACAGATGAACTTAAAACAT	CCACAAAGGGCCGAGTTAAG	AGAGAATCCTCTCGCCATCC	CCACAAAGGGCCGAGTTAAGTTTGTACTATAAGATACTCACCAGGACAGCCACAGATGAACTTAAAACATAGAGAATCCTCTCGCCATCC
1696	TTTCTATAAGATACTCAACAGGGCAGCCACAGATGAACTTAAATATATCA	CCACAAAGGGCCGAGTTAAG	AGAGAATCCTCTCGCCATCC	CCACAAAGGGCCGAGTTAAGTTTCTATAAGATACTCAACAGGGCAGCCACAGATGAACTTAAATATATCAAGAGAATCCTCTCGCCATCC
1697	AAAGAGGCAAAAGTATAAGAGGACAAAGTAGAAAATGCTCACCAATGATG	CCACAAAGGGCCGAGTTAAG	AGAGAATCCTCTCGCCATCC	CCACAAAGGGCCGAGTTAAGAAAGAGGCAAAAGTATAAGAGGACAAAGTAGAAAATGCTCACCAATGATGAGAGAATCCTCTCGCCATCC
1698	TAGCTTATATTGAAGTATAGAAGAAGATAGCGGCTTTTGTATTCTTTGGA	CCACAAAGGGCCGAGTTAAG	AGAGAATCCTCTCGCCATCC	CCACAAAGGGCCGAGTTAAGTAGCTTATATTGAAGTATAGAAGAAGATAGCGGCTTTTGTATTCTTTGGAAGAGAATCCTCTCGCCATCC
1699	CTCATCTTAAGGTGCTTGCAATTAATCTCTTGGGAATAAAGTGAATATCT	CCACAAAGGGCCGAGTTAAG	AGAGAATCCTCTCGCCATCC	CCACAAAGGGCCGAGTTAAGCTCATCTTAAGGTGCTTGCAATTAATCTCTTGGGAATAAAGTGAATATCTAGAGAATCCTCTCGCCATCC
1700	TCTTGCCTTTCATTTTCAATATTTGCAGCAGTCTAAGAATTATATACATC	CCACAAAGGGCCGAGTTAAG	AGAGAATCCTCTCGCCATCC	CCACAAAGGGCCGAGTTAAGTCTTGCCTTTCATTTTCAATATTTGCAGCAGTCTAAGAATTATATACATCAGAGAATCCTCTCGCCATCC
1701	TTCTATTTGTTGTCTTTTGTCTTCTTTTGAGCTTTACTTTACTGCTGTGA	CCACAAAGGGCCGAGTTAAG	AGAGAATCCTCTCGCCATCC	CCACAAAGGGCCGAGTTAAGTTCTATTTGTTGTCTTTTGTCTTCTTTTGAGCTTTACTTTACTGCTGTGAAGAGAATCCTCTCGCCATCC
1702	ACTGTTATAAACTAATATGAAGGGTGATGATCTAAATCTTTTATAATCTA	CCACAAAGGGCCGAGTTAAG	AGAGAATCCTCTCGCCATCC	CCACAAAGGGCCGAGTTAAGACTGTTATAAACTAATATGAAGGGTGATGATCTAAATCTTTTATAATCTAAGAGAATCCTCTCGCCATCC
1703	TATAGAATAATTACCAACAAAATATAACAATCCTTTAGAAGAAGAATAGT	CCACAAAGGGCCGAGTTAAG	AGAGAATCCTCTCGCCATCC	CCACAAAGGGCCGAGTTAAGTATAGAATAATTACCAACAAAATATAACAATCCTTTAGAAGAAGAATAGTAGAGAATCCTCTCGCCATCC
1704	CAGGACGATGATTTCAGCTTTTAAAGAATCGATTATGATCAAATGTCTTA	CCACAAAGGGCCGAGTTAAG	AGAGAATCCTCTCGCCATCC	CCACAAAGGGCCGAGTTAAGCAGGACGATGATTTCAGCTTTTAAAGAATCGATTATGATCAAATGTCTTAAGAGAATCCTCTCGCCATCC
1705	TGATAGATAGTTCTTAAATGTGTGCAAACTTTTAAAACCAATCATTGTTT	CCACAAAGGGCCGAGTTAAG	AGAGAATCCTCTCGCCATCC	CCACAAAGGGCCGAGTTAAGTGATAGATAGTTCTTAAATGTGTGCAAACTTTTAAAACCAATCATTGTTTAGAGAATCCTCTCGCCATCC
1706	CTATTCCAGAAGATATGCAGCTAAAGGAGTTGAGTGAGTCTAGTTTGCCC	CCACAAAGGGCCGAGTTAAG	AGAGAATCCTCTCGCCATCC	CCACAAAGGGCCGAGTTAAGCTATTCCAGAAGATATGCAGCTAAAGGAGTTGAGTGAGTCTAGTTTGCCCAGAGAATCCTCTCGCCATCC
1707	CTCTTCAGTTTTCACAACGGACATGTAACTACCTTCAGACATCAGTGATT	CCACAAAGGGCCGAGTTAAG	AGAGAATCCTCTCGCCATCC	CCACAAAGGGCCGAGTTAAGCTCTTCAGTTTTCACAACGGACATGTAACTACCTTCAGACATCAGTGATTAGAGAATCCTCTCGCCATCC
1708	GTTTTCCCTTTTCTTTCAAGATCAGATGTTTTCTAGTAAAATTCTTTGAT	CCACAAAGGGCCGAGTTAAG	AGAGAATCCTCTCGCCATCC	CCACAAAGGGCCGAGTTAAGGTTTTCCCTTTTCTTTCAAGATCAGATGTTTTCTAGTAAAATTCTTTGATAGAGAATCCTCTCGCCATCC
1709	ACCGAAGATTTGTCCTGCATCTTGAATATGAAGCTAAATTTCTAAGAGCA	CCACAAAGGGCCGAGTTAAG	AGAGAATCCTCTCGCCATCC	CCACAAAGGGCCGAGTTAAGACCGAAGATTTGTCCTGCATCTTGAATATGAAGCTAAATTTCTAAGAGCAAGAGAATCCTCTCGCCATCC
1710	TTCTTCCAACCTACTGTCATCTGCCGTTCTTTAGGATATTTTGGGTATTC	CCACAAAGGGCCGAGTTAAG	AGAGAATCCTCTCGCCATCC	CCACAAAGGGCCGAGTTAAGTTCTTCCAACCTACTGTCATCTGCCGTTCTTTAGGATATTTTGGGTATTCAGAGAATCCTCTCGCCATCC
1711	TTAGAGCCATTTGTTTTAGTGCTTTTGCAACTTCAACTCTAGTCAAAGGT	CCACAAAGGGCCGAGTTAAG	AGAGAATCCTCTCGCCATCC	CCACAAAGGGCCGAGTTAAGTTAGAGCCATTTGTTTTAGTGCTTTTGCAACTTCAACTCTAGTCAAAGGTAGAGAATCCTCTCGCCATCC
1712	TCAATCCCCTTCTCTCCCTGTGTCTCTCGTTTCCTCCTCCACTTTGTGTC	CCACAAAGGGCCGAGTTAAG	AGAGAATCCTCTCGCCATCC	CCACAAAGGGCCGAGTTAAGTCAATCCCCTTCTCTCCCTGTGTCTCTCGTTTCCTCCTCCACTTTGTGTCAGAGAATCCTCTCGCCATCC
1713	AATCTCCGATTAAAACCAACTTAAACAAGTAGTCGTAGTCATCGTCGGCT	CCACAAAGGGCCGAGTTAAG	AGAGAATCCTCTCGCCATCC	CCACAAAGGGCCGAGTTAAGAATCTCCGATTAAAACCAACTTAAACAAGTAGTCGTAGTCATCGTCGGCTAGAGAATCCTCTCGCCATCC
1714	GCTCGTATGATACATTTTCTATTATTGGATCTTATACTATCTCCTCGTAA	CCACAAAGGGCCGAGTTAAG	AGAGAATCCTCTCGCCATCC	CCACAAAGGGCCGAGTTAAGGCTCGTATGATACATTTTCTATTATTGGATCTTATACTATCTCCTCGTAAAGAGAATCCTCTCGCCATCC
1715	TATGAGAGTGAAAGGTAATACAAATACTAAAATTTAGACAAAATAGTAAA	CCACAAAGGGCCGAGTTAAG	AGAGAATCCTCTCGCCATCC	CCACAAAGGGCCGAGTTAAGTATGAGAGTGAAAGGTAATACAAATACTAAAATTTAGACAAAATAGTAAAAGAGAATCCTCTCGCCATCC
1716	GACTTACTTCATGGATTGTTATAATGTCTGCATAATTTGAAGAAGTAGCA	CCACAAAGGGCCGAGTTAAG	AGAGAATCCTCTCGCCATCC	CCACAAAGGGCCGAGTTAAGGACTTACTTCATGGATTGTTATAATGTCTGCATAATTTGAAGAAGTAGCAAGAGAATCCTCTCGCCATCC
1717	ACATAAAACTAGATCTCTCAAACATGCTATTTCATGGAGTTCTACAAAAC	CCACAAAGGGCCGAGTTAAG	AGAGAATCCTCTCGCCATCC	CCACAAAGGGCCGAGTTAAGACATAAAACTAGATCTCTCAAACATGCTATTTCATGGAGTTCTACAAAACAGAGAATCCTCTCGCCATCC
1718	CTTAAGTGAAAGTTTGTTTTCTATTTTGAAACAATAAAAGGCCAGCTATA	CCACAAAGGGCCGAGTTAAG	AGAGAATCCTCTCGCCATCC	CCACAAAGGGCCGAGTTAAGCTTAAGTGAAAGTTTGTTTTCTATTTTGAAACAATAAAAGGCCAGCTATAAGAGAATCCTCTCGCCATCC
1719	CTTCCACTTACCTTACAACCATTTACCTCCAACATATGTCAATCAGTCAA	CCACAAAGGGCCGAGTTAAG	AGAGAATCCTCTCGCCATCC	CCACAAAGGGCCGAGTTAAGCTTCCACTTACCTTACAACCATTTACCTCCAACATATGTCAATCAGTCAAAGAGAATCCTCTCGCCATCC
1720	CAATTGGGAATTCTTGAATGTTTCTCCTTGCTGATACAGGCTGTTGGTTT	CCACAAAGGGCCGAGTTAAG	AGAGAATCCTCTCGCCATCC	CCACAAAGGGCCGAGTTAAGCAATTGGGAATTCTTGAATGTTTCTCCTTGCTGATACAGGCTGTTGGTTTAGAGAATCCTCTCGCCATCC
1721	CATGCATTTGGATTTACATATACGCACAGAAACAGTCATCAGAAATAATT	CCACAAAGGGCCGAGTTAAG	AGAGAATCCTCTCGCCATCC	CCACAAAGGGCCGAGTTAAGCATGCATTTGGATTTACATATACGCACAGAAACAGTCATCAGAAATAATTAGAGAATCCTCTCGCCATCC
1722	ATGTGGTACTTGTAGTTGTCGATCGAACTCAGAAAGAAACATATCTGGGG	CCACAAAGGGCCGAGTTAAG	AGAGAATCCTCTCGCCATCC	CCACAAAGGGCCGAGTTAAGATGTGGTACTTGTAGTTGTCGATCGAACTCAGAAAGAAACATATCTGGGGAGAGAATCCTCTCGCCATCC
1723	AAATTACAAAATTAAACCATAATTATATGTAATATAGTAATTATCATAGG	CCACAAAGGGCCGAGTTAAG	AGAGAATCCTCTCGCCATCC	CCACAAAGGGCCGAGTTAAGAAATTACAAAATTAAACCATAATTATATGTAATATAGTAATTATCATAGGAGAGAATCCTCTCGCCATCC
1724	GGTGTTATTTATGCATCACATGTTAACCAAAATCTTCAATATGCAAACCT	CCACAAAGGGCCGAGTTAAG	AGAGAATCCTCTCGCCATCC	CCACAAAGGGCCGAGTTAAGGGTGTTATTTATGCATCACATGTTAACCAAAATCTTCAATATGCAAACCTAGAGAATCCTCTCGCCATCC
1725	TCTCAGAAGCTAGAGAGTCATTAATGCTCAGATCTAGGACATCTTCTTCA	CCACAAAGGGCCGAGTTAAG	AGAGAATCCTCTCGCCATCC	CCACAAAGGGCCGAGTTAAGTCTCAGAAGCTAGAGAGTCATTAATGCTCAGATCTAGGACATCTTCTTCAAGAGAATCCTCTCGCCATCC
1726	GAATGAACTTGGAAAATGCCATCAAAATCGGTAACTATATCGGGGAGTTT	CCACAAAGGGCCGAGTTAAG	AGAGAATCCTCTCGCCATCC	CCACAAAGGGCCGAGTTAAGGAATGAACTTGGAAAATGCCATCAAAATCGGTAACTATATCGGGGAGTTTAGAGAATCCTCTCGCCATCC
1727	TAGTTGTCATCCCATCCGGCCCTGGACTTTTGTATCCTCCCATATCGAAG	CCACAAAGGGCCGAGTTAAG	AGAGAATCCTCTCGCCATCC	CCACAAAGGGCCGAGTTAAGTAGTTGTCATCCCATCCGGCCCTGGACTTTTGTATCCTCCCATATCGAAGAGAGAATCCTCTCGCCATCC
1728	CTGTTCTAAAATAGCACTTCCGTTAGAAATATATAGTAACTTTAAAATTC	CCACAAAGGGCCGAGTTAAG	AGAGAATCCTCTCGCCATCC	CCACAAAGGGCCGAGTTAAGCTGTTCTAAAATAGCACTTCCGTTAGAAATATATAGTAACTTTAAAATTCAGAGAATCCTCTCGCCATCC
1729	AATTAATCCGCTACTTTAATTTTCGAATTATTTACAATTGTGCCCCGAAA	CCACAAAGGGCCGAGTTAAG	AGAGAATCCTCTCGCCATCC	CCACAAAGGGCCGAGTTAAGAATTAATCCGCTACTTTAATTTTCGAATTATTTACAATTGTGCCCCGAAAAGAGAATCCTCTCGCCATCC
1730	ATTGACAGAGCCAATAGACATATACAGCGAGTGGATTGATGAATGTGAGC	CCACAAAGGGCCGAGTTAAG	AGAGAATCCTCTCGCCATCC	CCACAAAGGGCCGAGTTAAGATTGACAGAGCCAATAGACATATACAGCGAGTGGATTGATGAATGTGAGCAGAGAATCCTCTCGCCATCC
1731	ATAGATTTCTGGGTTTCATTCTCTGCCTCTGTGAACTGTTTCTTTGGCCC	CCACAAAGGGCCGAGTTAAG	AGAGAATCCTCTCGCCATCC	CCACAAAGGGCCGAGTTAAGATAGATTTCTGGGTTTCATTCTCTGCCTCTGTGAACTGTTTCTTTGGCCCAGAGAATCCTCTCGCCATCC
1732	TCATACAAATTCCAATACACTCTACTTCAGGACAACCCAAAGAAAAGAAA	CCACAAAGGGCCGAGTTAAG	AGAGAATCCTCTCGCCATCC	CCACAAAGGGCCGAGTTAAGTCATACAAATTCCAATACACTCTACTTCAGGACAACCCAAAGAAAAGAAAAGAGAATCCTCTCGCCATCC
1733	ATATTCACACCATTTAATCAAAGAGCCCCAAGTCAACAGTTTTACTATCT	CCACAAAGGGCCGAGTTAAG	AGAGAATCCTCTCGCCATCC	CCACAAAGGGCCGAGTTAAGATATTCACACCATTTAATCAAAGAGCCCCAAGTCAACAGTTTTACTATCTAGAGAATCCTCTCGCCATCC
1734	AATTTACCAGAAGAACAGGAAACAATGGGAAAAGAGCATTAAGGATTTCA	CCACAAAGGGCCGAGTTAAG	AGAGAATCCTCTCGCCATCC	CCACAAAGGGCCGAGTTAAGAATTTACCAGAAGAACAGGAAACAATGGGAAAAGAGCATTAAGGATTTCAAGAGAATCCTCTCGCCATCC
1735	AAACACATATTCCAGAATATAAGTACATTCAAAATTTCTTTCCTACAGAA	CCACAAAGGGCCGAGTTAAG	AGAGAATCCTCTCGCCATCC	CCACAAAGGGCCGAGTTAAGAAACACATATTCCAGAATATAAGTACATTCAAAATTTCTTTCCTACAGAAAGAGAATCCTCTCGCCATCC
1736	AGGTATCCTACAAATGACCATTGAATTGTCTCATATATTCATGGAGAAAT	CCACAAAGGGCCGAGTTAAG	AGAGAATCCTCTCGCCATCC	CCACAAAGGGCCGAGTTAAGAGGTATCCTACAAATGACCATTGAATTGTCTCATATATTCATGGAGAAATAGAGAATCCTCTCGCCATCC
1737	GAGTAGTGTTCTTTCTTTTATCATCCTAGTTTCTTAACCATTATCCCAAA	CCACAAAGGGCCGAGTTAAG	AGAGAATCCTCTCGCCATCC	CCACAAAGGGCCGAGTTAAGGAGTAGTGTTCTTTCTTTTATCATCCTAGTTTCTTAACCATTATCCCAAAAGAGAATCCTCTCGCCATCC
1738	TACAACATAAAACTATATAAAATGAAGCCAAAATCTAGATACAAAGTTCT	CCACAAAGGGCCGAGTTAAG	AGAGAATCCTCTCGCCATCC	CCACAAAGGGCCGAGTTAAGTACAACATAAAACTATATAAAATGAAGCCAAAATCTAGATACAAAGTTCTAGAGAATCCTCTCGCCATCC
1739	AACTATATGTGTAATCATAATCATATCTAGAAGCCCCGTTCTAAAGACAA	CCACAAAGGGCCGAGTTAAG	AGAGAATCCTCTCGCCATCC	CCACAAAGGGCCGAGTTAAGAACTATATGTGTAATCATAATCATATCTAGAAGCCCCGTTCTAAAGACAAAGAGAATCCTCTCGCCATCC
1740	TCCTTACAATATACTTTCATTATACATGTAGTTGAGGTATAGATTGTCAT	CCACAAAGGGCCGAGTTAAG	AGAGAATCCTCTCGCCATCC	CCACAAAGGGCCGAGTTAAGTCCTTACAATATACTTTCATTATACATGTAGTTGAGGTATAGATTGTCATAGAGAATCCTCTCGCCATCC
1741	TGTTACCAAGCTACGCATTCTTAACTTTATTTGTTAATTATGGTAGTTAA	CCACAAAGGGCCGAGTTAAG	AGAGAATCCTCTCGCCATCC	CCACAAAGGGCCGAGTTAAGTGTTACCAAGCTACGCATTCTTAACTTTATTTGTTAATTATGGTAGTTAAAGAGAATCCTCTCGCCATCC
1742	TTAAGAATTTTCAGTTGGCACTCTCTTAACATTCGGGTAATCGGATCATC	CCACAAAGGGCCGAGTTAAG	AGAGAATCCTCTCGCCATCC	CCACAAAGGGCCGAGTTAAGTTAAGAATTTTCAGTTGGCACTCTCTTAACATTCGGGTAATCGGATCATCAGAGAATCCTCTCGCCATCC
1743	ATTGAAAGTTTTCTGAAGCTATTTTGATGAGGAATACTTCTTATGCATGC	CCACAAAGGGCCGAGTTAAG	AGAGAATCCTCTCGCCATCC	CCACAAAGGGCCGAGTTAAGATTGAAAGTTTTCTGAAGCTATTTTGATGAGGAATACTTCTTATGCATGCAGAGAATCCTCTCGCCATCC
1744	TGGAGCTCGCATGGACTAACTTATCTAAGCCAATTAAGAGGAAGAGAGAA	CCACAAAGGGCCGAGTTAAG	AGAGAATCCTCTCGCCATCC	CCACAAAGGGCCGAGTTAAGTGGAGCTCGCATGGACTAACTTATCTAAGCCAATTAAGAGGAAGAGAGAAAGAGAATCCTCTCGCCATCC
1745	AATATGTGCTTGATATATTTACAGTTCAAAGTTCTGGTAGAAACGGTACT	CCACAAAGGGCCGAGTTAAG	AGAGAATCCTCTCGCCATCC	CCACAAAGGGCCGAGTTAAGAATATGTGCTTGATATATTTACAGTTCAAAGTTCTGGTAGAAACGGTACTAGAGAATCCTCTCGCCATCC
1746	ATTATTGTAGATTTTATTTATGATATGAAACAAAATGCACAGTATTGATA	CCACAAAGGGCCGAGTTAAG	AGAGAATCCTCTCGCCATCC	CCACAAAGGGCCGAGTTAAGATTATTGTAGATTTTATTTATGATATGAAACAAAATGCACAGTATTGATAAGAGAATCCTCTCGCCATCC
1747	TTTCATTTATTTTACTTATCCTGGGAATGCAGATTAGAATAACTGATTTC	CCACAAAGGGCCGAGTTAAG	AGAGAATCCTCTCGCCATCC	CCACAAAGGGCCGAGTTAAGTTTCATTTATTTTACTTATCCTGGGAATGCAGATTAGAATAACTGATTTCAGAGAATCCTCTCGCCATCC
1748	ATGCTCAATCTTCAATTGTTGCTATATCAAGTGGAACTGATACAAGTGCA	CCACAAAGGGCCGAGTTAAG	AGAGAATCCTCTCGCCATCC	CCACAAAGGGCCGAGTTAAGATGCTCAATCTTCAATTGTTGCTATATCAAGTGGAACTGATACAAGTGCAAGAGAATCCTCTCGCCATCC
1749	GCTTCAGATTTCTATCACTCAGAGATCGAAGGATTTTATTCACAATTTAA	CCACAAAGGGCCGAGTTAAG	AGAGAATCCTCTCGCCATCC	CCACAAAGGGCCGAGTTAAGGCTTCAGATTTCTATCACTCAGAGATCGAAGGATTTTATTCACAATTTAAAGAGAATCCTCTCGCCATCC
1750	AGATGCCTTGTTTATCTAATATTACCTTGTTATTGTATGTGACTTTCTTG	CCACAAAGGGCCGAGTTAAG	AGAGAATCCTCTCGCCATCC	CCACAAAGGGCCGAGTTAAGAGATGCCTTGTTTATCTAATATTACCTTGTTATTGTATGTGACTTTCTTGAGAGAATCCTCTCGCCATCC
1751	GGTCATTAATACTATCTTTATTCTGTTATGTGACTCATTTCTGACTTCTC	CCACAAAGGGCCGAGTTAAG	AGAGAATCCTCTCGCCATCC	CCACAAAGGGCCGAGTTAAGGGTCATTAATACTATCTTTATTCTGTTATGTGACTCATTTCTGACTTCTCAGAGAATCCTCTCGCCATCC
1752	GATGCTGAAGGTTTAGAAGAAATCCGCAAGCTAACTGAGGTAGGAAAATT	CCACAAAGGGCCGAGTTAAG	AGAGAATCCTCTCGCCATCC	CCACAAAGGGCCGAGTTAAGGATGCTGAAGGTTTAGAAGAAATCCGCAAGCTAACTGAGGTAGGAAAATTAGAGAATCCTCTCGCCATCC
1753	TGAGGGACAAACCACTGATACATAATTTTGATTTCCATTGTAGATATTTT	CCACAAAGGGCCGAGTTAAG	AGAGAATCCTCTCGCCATCC	CCACAAAGGGCCGAGTTAAGTGAGGGACAAACCACTGATACATAATTTTGATTTCCATTGTAGATATTTTAGAGAATCCTCTCGCCATCC
1754	TACATAGTCCTGCTTCTCCAATTGATACGAGACCTCACAGAAATAAATAA	CCACAAAGGGCCGAGTTAAG	AGAGAATCCTCTCGCCATCC	CCACAAAGGGCCGAGTTAAGTACATAGTCCTGCTTCTCCAATTGATACGAGACCTCACAGAAATAAATAAAGAGAATCCTCTCGCCATCC
1755	CTCCCGAACATGCTCATCAAAATTCTTTCTCTTCACCTAATATTTCTCAT	CCACAAAGGGCCGAGTTAAG	AGAGAATCCTCTCGCCATCC	CCACAAAGGGCCGAGTTAAGCTCCCGAACATGCTCATCAAAATTCTTTCTCTTCACCTAATATTTCTCATAGAGAATCCTCTCGCCATCC
1756	TTGTTGCTTTTGTATAGAATGAAAATGGACGGGTTACATAAGAATCATCT	CCACAAAGGGCCGAGTTAAG	AGAGAATCCTCTCGCCATCC	CCACAAAGGGCCGAGTTAAGTTGTTGCTTTTGTATAGAATGAAAATGGACGGGTTACATAAGAATCATCTAGAGAATCCTCTCGCCATCC
1757	TTTGGAAAGGGTGAACAACATGGTAACTTCCTAACTCCTTAACTCAGTAT	CCACAAAGGGCCGAGTTAAG	AGAGAATCCTCTCGCCATCC	CCACAAAGGGCCGAGTTAAGTTTGGAAAGGGTGAACAACATGGTAACTTCCTAACTCCTTAACTCAGTATAGAGAATCCTCTCGCCATCC
1758	AAAAGAAAATCTATTGCAAAGTTGACCCAAGACTTAGCCCCAAACACTTG	CCACAAAGGGCCGAGTTAAG	AGAGAATCCTCTCGCCATCC	CCACAAAGGGCCGAGTTAAGAAAAGAAAATCTATTGCAAAGTTGACCCAAGACTTAGCCCCAAACACTTGAGAGAATCCTCTCGCCATCC
1759	ATACTATTCAACTTAAACGTAAATATAACTTAAAATACCGCTTATAATTA	CCACAAAGGGCCGAGTTAAG	AGAGAATCCTCTCGCCATCC	CCACAAAGGGCCGAGTTAAGATACTATTCAACTTAAACGTAAATATAACTTAAAATACCGCTTATAATTAAGAGAATCCTCTCGCCATCC
1760	ATTGAACAATTTTATTTCTGTTAAATCAATCTTTATATTTAAAAGTTATG	CCACAAAGGGCCGAGTTAAG	AGAGAATCCTCTCGCCATCC	CCACAAAGGGCCGAGTTAAGATTGAACAATTTTATTTCTGTTAAATCAATCTTTATATTTAAAAGTTATGAGAGAATCCTCTCGCCATCC
1761	TTCGTCTTAATTAATGAATCTAGTTGGTGATGATTAATGTAGAGGTAGTC	CCACAAAGGGCCGAGTTAAG	AGAGAATCCTCTCGCCATCC	CCACAAAGGGCCGAGTTAAGTTCGTCTTAATTAATGAATCTAGTTGGTGATGATTAATGTAGAGGTAGTCAGAGAATCCTCTCGCCATCC
1762	GGTTGCATTATATTATGGGAATCTTTGAGACATGTTGTGACCATCAATGC	CCACAAAGGGCCGAGTTAAG	AGAGAATCCTCTCGCCATCC	CCACAAAGGGCCGAGTTAAGGGTTGCATTATATTATGGGAATCTTTGAGACATGTTGTGACCATCAATGCAGAGAATCCTCTCGCCATCC
1763	TTCCTAAAACTAACCTCTCCTCCACCACTTCTCCTCCGCGACAGACTTCG	CCACAAAGGGCCGAGTTAAG	AGAGAATCCTCTCGCCATCC	CCACAAAGGGCCGAGTTAAGTTCCTAAAACTAACCTCTCCTCCACCACTTCTCCTCCGCGACAGACTTCGAGAGAATCCTCTCGCCATCC
1764	AAAGCCTCACAAATAGTCACCGGCAAATGAACCCATCTCTGATTCCTGTG	CCACAAAGGGCCGAGTTAAG	AGAGAATCCTCTCGCCATCC	CCACAAAGGGCCGAGTTAAGAAAGCCTCACAAATAGTCACCGGCAAATGAACCCATCTCTGATTCCTGTGAGAGAATCCTCTCGCCATCC
1765	CCACCGCCATTCCCTGCTCCTTCTTCGTCCCCTTCCCTCCTCCTCCCAGC	CCACAAAGGGCCGAGTTAAG	AGAGAATCCTCTCGCCATCC	CCACAAAGGGCCGAGTTAAGCCACCGCCATTCCCTGCTCCTTCTTCGTCCCCTTCCCTCCTCCTCCCAGCAGAGAATCCTCTCGCCATCC
1766	TTTGGTAAATTTGGATTTTAACTTATATAACTTGATAAATTTCATCATTT	CCACAAAGGGCCGAGTTAAG	AGAGAATCCTCTCGCCATCC	CCACAAAGGGCCGAGTTAAGTTTGGTAAATTTGGATTTTAACTTATATAACTTGATAAATTTCATCATTTAGAGAATCCTCTCGCCATCC
1767	TTAAAATACAATGTGAATTGAAGCTAAATCTCGAGTTTAATACTAAATTC	CCACAAAGGGCCGAGTTAAG	AGAGAATCCTCTCGCCATCC	CCACAAAGGGCCGAGTTAAGTTAAAATACAATGTGAATTGAAGCTAAATCTCGAGTTTAATACTAAATTCAGAGAATCCTCTCGCCATCC
1768	TATTCTGACATAGTTTAAAAGGTATGCAATTATAGAAATATTGATATGAC	CCACAAAGGGCCGAGTTAAG	AGAGAATCCTCTCGCCATCC	CCACAAAGGGCCGAGTTAAGTATTCTGACATAGTTTAAAAGGTATGCAATTATAGAAATATTGATATGACAGAGAATCCTCTCGCCATCC
1769	ATTTGTGCATTTCCAATTCAAGGCTACTATTTTCCAGTATGCAGCTATGA	CCACAAAGGGCCGAGTTAAG	AGAGAATCCTCTCGCCATCC	CCACAAAGGGCCGAGTTAAGATTTGTGCATTTCCAATTCAAGGCTACTATTTTCCAGTATGCAGCTATGAAGAGAATCCTCTCGCCATCC
1770	AAGTCATCGTCACATAAGTTAAATTCAATACCTCTCATTTCGCAAGTCAA	CCACAAAGGGCCGAGTTAAG	AGAGAATCCTCTCGCCATCC	CCACAAAGGGCCGAGTTAAGAAGTCATCGTCACATAAGTTAAATTCAATACCTCTCATTTCGCAAGTCAAAGAGAATCCTCTCGCCATCC
1771	TTTAATAAACAAATTAACCATATTTAAATATAAACGAGTTTGAATAAGAT	CCACAAAGGGCCGAGTTAAG	AGAGAATCCTCTCGCCATCC	CCACAAAGGGCCGAGTTAAGTTTAATAAACAAATTAACCATATTTAAATATAAACGAGTTTGAATAAGATAGAGAATCCTCTCGCCATCC
1772	AATTATAAGAATAAATAGTTGAATGAATTCGAACGAGATTTTAGATTTCC	CCACAAAGGGCCGAGTTAAG	AGAGAATCCTCTCGCCATCC	CCACAAAGGGCCGAGTTAAGAATTATAAGAATAAATAGTTGAATGAATTCGAACGAGATTTTAGATTTCCAGAGAATCCTCTCGCCATCC
1773	GGCTAATAATCTTCTGTTTGATTAATGTAAGTTTATATAGAGGAATAAAA	CCACAAAGGGCCGAGTTAAG	AGAGAATCCTCTCGCCATCC	CCACAAAGGGCCGAGTTAAGGGCTAATAATCTTCTGTTTGATTAATGTAAGTTTATATAGAGGAATAAAAAGAGAATCCTCTCGCCATCC
1774	AGCCCCTTCAGAACATGCAGTATATAGGCGCGGAAATGGGACATTGCATC	CCACAAAGGGCCGAGTTAAG	AGAGAATCCTCTCGCCATCC	CCACAAAGGGCCGAGTTAAGAGCCCCTTCAGAACATGCAGTATATAGGCGCGGAAATGGGACATTGCATCAGAGAATCCTCTCGCCATCC
1775	TTGAAAATGATCAAGAAAAGCGGTAGAAAGATATCTAAAATACAAGAGAG	CCACAAAGGGCCGAGTTAAG	AGAGAATCCTCTCGCCATCC	CCACAAAGGGCCGAGTTAAGTTGAAAATGATCAAGAAAAGCGGTAGAAAGATATCTAAAATACAAGAGAGAGAGAATCCTCTCGCCATCC
1776	AAAAGAGGGATTGAAATAGGAGGAACAGATACAGAAGCAAGACTATGTTG	CCACAAAGGGCCGAGTTAAG	AGAGAATCCTCTCGCCATCC	CCACAAAGGGCCGAGTTAAGAAAAGAGGGATTGAAATAGGAGGAACAGATACAGAAGCAAGACTATGTTGAGAGAATCCTCTCGCCATCC
1777	GTATTGGCAATGTATTTCTATCTAGATTCTGCAAGAGTCCCACCATGAAC	CCACAAAGGGCCGAGTTAAG	AGAGAATCCTCTCGCCATCC	CCACAAAGGGCCGAGTTAAGGTATTGGCAATGTATTTCTATCTAGATTCTGCAAGAGTCCCACCATGAACAGAGAATCCTCTCGCCATCC
1778	TTCTCCATTCTCTGTTTCATTTATTGCAGAATCTCCTGTGAATGAATTGA	CCACAAAGGGCCGAGTTAAG	AGAGAATCCTCTCGCCATCC	CCACAAAGGGCCGAGTTAAGTTCTCCATTCTCTGTTTCATTTATTGCAGAATCTCCTGTGAATGAATTGAAGAGAATCCTCTCGCCATCC
1779	TCTTCAAGCTCCCCATATTGAGAAAAGATGTTACGGAGTTTATCAGTAGT	CCACAAAGGGCCGAGTTAAG	AGAGAATCCTCTCGCCATCC	CCACAAAGGGCCGAGTTAAGTCTTCAAGCTCCCCATATTGAGAAAAGATGTTACGGAGTTTATCAGTAGTAGAGAATCCTCTCGCCATCC
1780	AAATATGGGCCAATATTTGAACCTTGTTACTTGAATGACGGTGTCCTCAA	CCACAAAGGGCCGAGTTAAG	AGAGAATCCTCTCGCCATCC	CCACAAAGGGCCGAGTTAAGAAATATGGGCCAATATTTGAACCTTGTTACTTGAATGACGGTGTCCTCAAAGAGAATCCTCTCGCCATCC
1781	CACCACCAAGATAACTCTCTGGCCGTTTGTTTTCCCGAATCAAAATATTC	CCACAAAGGGCCGAGTTAAG	AGAGAATCCTCTCGCCATCC	CCACAAAGGGCCGAGTTAAGCACCACCAAGATAACTCTCTGGCCGTTTGTTTTCCCGAATCAAAATATTCAGAGAATCCTCTCGCCATCC
1782	AGGTTAGAAGAGACTTTCGCCTTAAATCTTTTAACTTAGTTGAGAATAAC	CCACAAAGGGCCGAGTTAAG	AGAGAATCCTCTCGCCATCC	CCACAAAGGGCCGAGTTAAGAGGTTAGAAGAGACTTTCGCCTTAAATCTTTTAACTTAGTTGAGAATAACAGAGAATCCTCTCGCCATCC
1783	AAGATGCAATGTTACTGTCAAAGTGTGTAAAATACTCTCAAAAGCCTAAT	CCACAAAGGGCCGAGTTAAG	AGAGAATCCTCTCGCCATCC	CCACAAAGGGCCGAGTTAAGAAGATGCAATGTTACTGTCAAAGTGTGTAAAATACTCTCAAAAGCCTAATAGAGAATCCTCTCGCCATCC
1784	AAAGAAGACGAAAGATTGGAGTAGGAAATAAAGGGAGAGTGCCATGGAAC	CCACAAAGGGCCGAGTTAAG	AGAGAATCCTCTCGCCATCC	CCACAAAGGGCCGAGTTAAGAAAGAAGACGAAAGATTGGAGTAGGAAATAAAGGGAGAGTGCCATGGAACAGAGAATCCTCTCGCCATCC
1785	CATTACTAGATATATTATGTTCAGTTAATTGGAAATTTCTATACCTTCAC	CCACAAAGGGCCGAGTTAAG	AGAGAATCCTCTCGCCATCC	CCACAAAGGGCCGAGTTAAGCATTACTAGATATATTATGTTCAGTTAATTGGAAATTTCTATACCTTCACAGAGAATCCTCTCGCCATCC
1786	AAAACATGTCACCTAAACACTTGGAGAAAATCAACAAAAGTAAAAGAATC	CCACAAAGGGCCGAGTTAAG	AGAGAATCCTCTCGCCATCC	CCACAAAGGGCCGAGTTAAGAAAACATGTCACCTAAACACTTGGAGAAAATCAACAAAAGTAAAAGAATCAGAGAATCCTCTCGCCATCC
1787	ACAGAATATATTTTCATCCTAGCTTCTTCCTCACTGAAACATGCATACAG	CCACAAAGGGCCGAGTTAAG	AGAGAATCCTCTCGCCATCC	CCACAAAGGGCCGAGTTAAGACAGAATATATTTTCATCCTAGCTTCTTCCTCACTGAAACATGCATACAGAGAGAATCCTCTCGCCATCC
1788	TTAATAGATGTCCAATACTCACAAATATCCACATAAATAGTCAGTTTGAT	CCACAAAGGGCCGAGTTAAG	AGAGAATCCTCTCGCCATCC	CCACAAAGGGCCGAGTTAAGTTAATAGATGTCCAATACTCACAAATATCCACATAAATAGTCAGTTTGATAGAGAATCCTCTCGCCATCC
1789	TAAGTAGTAACTAATAATCTTAAAGTTCTGTATACAGTCAAAATGAGACA	CCACAAAGGGCCGAGTTAAG	AGAGAATCCTCTCGCCATCC	CCACAAAGGGCCGAGTTAAGTAAGTAGTAACTAATAATCTTAAAGTTCTGTATACAGTCAAAATGAGACAAGAGAATCCTCTCGCCATCC
1790	TCTACAAACAAACCTGTAATGTATTTTCTATATACAAACAAACACGTTAC	CCACAAAGGGCCGAGTTAAG	AGAGAATCCTCTCGCCATCC	CCACAAAGGGCCGAGTTAAGTCTACAAACAAACCTGTAATGTATTTTCTATATACAAACAAACACGTTACAGAGAATCCTCTCGCCATCC
1791	GTTGCGCTCCTGTGTAGGAAGACTCGTTGATCTCACAAATGATAGAGTCC	CCACAAAGGGCCGAGTTAAG	AGAGAATCCTCTCGCCATCC	CCACAAAGGGCCGAGTTAAGGTTGCGCTCCTGTGTAGGAAGACTCGTTGATCTCACAAATGATAGAGTCCAGAGAATCCTCTCGCCATCC
1792	GCAAAAGCTGATCCTGTCCATCAATTTGTTGACCAGACCCGTGATCATCA	CCACAAAGGGCCGAGTTAAG	AGAGAATCCTCTCGCCATCC	CCACAAAGGGCCGAGTTAAGGCAAAAGCTGATCCTGTCCATCAATTTGTTGACCAGACCCGTGATCATCAAGAGAATCCTCTCGCCATCC
1793	AGGGAAGTTAAGATCTAAAGCTTGGCATCATTTCACAAAGCTCATCAAGG	CCACAAAGGGCCGAGTTAAG	AGAGAATCCTCTCGCCATCC	CCACAAAGGGCCGAGTTAAGAGGGAAGTTAAGATCTAAAGCTTGGCATCATTTCACAAAGCTCATCAAGGAGAGAATCCTCTCGCCATCC
1794	GGATGAACATTAGTCATTTCTGAGAGTTTACTATGTCATTTCTTTTAATT	CCACAAAGGGCCGAGTTAAG	AGAGAATCCTCTCGCCATCC	CCACAAAGGGCCGAGTTAAGGGATGAACATTAGTCATTTCTGAGAGTTTACTATGTCATTTCTTTTAATTAGAGAATCCTCTCGCCATCC
1795	AGAAAATTGCCTGATTGTAAGATCGTATAAGTGCTAGCTCCTAAACCTCA	CCACAAAGGGCCGAGTTAAG	AGAGAATCCTCTCGCCATCC	CCACAAAGGGCCGAGTTAAGAGAAAATTGCCTGATTGTAAGATCGTATAAGTGCTAGCTCCTAAACCTCAAGAGAATCCTCTCGCCATCC
1796	AACTTGGTGCACTATAGATTAATATGAAGATTTAAAATAGAAAATGATGC	CCACAAAGGGCCGAGTTAAG	AGAGAATCCTCTCGCCATCC	CCACAAAGGGCCGAGTTAAGAACTTGGTGCACTATAGATTAATATGAAGATTTAAAATAGAAAATGATGCAGAGAATCCTCTCGCCATCC
1797	TTGTTTGTGTCTCATCATCATCTTCCTTGTCCTACTGCCACCTTTCTAGT	CCACAAAGGGCCGAGTTAAG	AGAGAATCCTCTCGCCATCC	CCACAAAGGGCCGAGTTAAGTTGTTTGTGTCTCATCATCATCTTCCTTGTCCTACTGCCACCTTTCTAGTAGAGAATCCTCTCGCCATCC
1798	TAGCAGTAACCTCTCCTCCTTTCGCTTCACAGCTTACATCCTTAAGAATA	CCACAAAGGGCCGAGTTAAG	AGAGAATCCTCTCGCCATCC	CCACAAAGGGCCGAGTTAAGTAGCAGTAACCTCTCCTCCTTTCGCTTCACAGCTTACATCCTTAAGAATAAGAGAATCCTCTCGCCATCC
1799	AATACAGAAACCCAACCATTAGAAGAAAAGGAATGAAGACGATGGTGTTT	CCACAAAGGGCCGAGTTAAG	AGAGAATCCTCTCGCCATCC	CCACAAAGGGCCGAGTTAAGAATACAGAAACCCAACCATTAGAAGAAAAGGAATGAAGACGATGGTGTTTAGAGAATCCTCTCGCCATCC
1800	CTTTATCATGGGTTCTTCTATCATTGCAGGATTGATGGGATCTTTCTTTT	CCACAAAGGGCCGAGTTAAG	AGAGAATCCTCTCGCCATCC	CCACAAAGGGCCGAGTTAAGCTTTATCATGGGTTCTTCTATCATTGCAGGATTGATGGGATCTTTCTTTTAGAGAATCCTCTCGCCATCC
1801	GTATTCTTCTCTTGGAAATTGTTACTGGAGGAAGCATTACAAATAAGCGC	CCACAAAGGGCCGAGTTAAG	AGAGAATCCTCTCGCCATCC	CCACAAAGGGCCGAGTTAAGGTATTCTTCTCTTGGAAATTGTTACTGGAGGAAGCATTACAAATAAGCGCAGAGAATCCTCTCGCCATCC
1802	CATTCAGTTTAGCTGGAAAACACGGACCAATATATGCATAGGTGTGGCAC	CCACAAAGGGCCGAGTTAAG	AGAGAATCCTCTCGCCATCC	CCACAAAGGGCCGAGTTAAGCATTCAGTTTAGCTGGAAAACACGGACCAATATATGCATAGGTGTGGCACAGAGAATCCTCTCGCCATCC
1803	ATCTTGAAAACCTCAGCATTGCTCAAACTCTTCTTGGTATTGAAAGATTC	CCACAAAGGGCCGAGTTAAG	AGAGAATCCTCTCGCCATCC	CCACAAAGGGCCGAGTTAAGATCTTGAAAACCTCAGCATTGCTCAAACTCTTCTTGGTATTGAAAGATTCAGAGAATCCTCTCGCCATCC
1804	TACAAAGAACTAAGAATTGCCACTGAAGATTTTAGAGCAGTAAATAAAAT	CCACAAAGGGCCGAGTTAAG	AGAGAATCCTCTCGCCATCC	CCACAAAGGGCCGAGTTAAGTACAAAGAACTAAGAATTGCCACTGAAGATTTTAGAGCAGTAAATAAAATAGAGAATCCTCTCGCCATCC
1805	AGTAGAATGGCGTTGAACTAAGGAATTTGACCTAATCCCGTATGCAAAAT	CCACAAAGGGCCGAGTTAAG	AGAGAATCCTCTCGCCATCC	CCACAAAGGGCCGAGTTAAGAGTAGAATGGCGTTGAACTAAGGAATTTGACCTAATCCCGTATGCAAAATAGAGAATCCTCTCGCCATCC
1806	ATTTGTAATGTGAAAATGGTGAATAGGGGATCAATATATTTATACATATT	CCACAAAGGGCCGAGTTAAG	AGAGAATCCTCTCGCCATCC	CCACAAAGGGCCGAGTTAAGATTTGTAATGTGAAAATGGTGAATAGGGGATCAATATATTTATACATATTAGAGAATCCTCTCGCCATCC
1807	CTTCTCTTAAAATTTACATTTTCGATGCTAATCTTAAGGACAATATGTAT	CCACAAAGGGCCGAGTTAAG	AGAGAATCCTCTCGCCATCC	CCACAAAGGGCCGAGTTAAGCTTCTCTTAAAATTTACATTTTCGATGCTAATCTTAAGGACAATATGTATAGAGAATCCTCTCGCCATCC
1808	AAATCCTATCATTCCGTACTCATCAACTCTAAAAGTAAAATCTCTTAGTC	CCACAAAGGGCCGAGTTAAG	AGAGAATCCTCTCGCCATCC	CCACAAAGGGCCGAGTTAAGAAATCCTATCATTCCGTACTCATCAACTCTAAAAGTAAAATCTCTTAGTCAGAGAATCCTCTCGCCATCC
1809	TGATGACATATCTTCTTCTAAATATCATGTACTTCCTCCGTTTGATAAAA	CCACAAAGGGCCGAGTTAAG	AGAGAATCCTCTCGCCATCC	CCACAAAGGGCCGAGTTAAGTGATGACATATCTTCTTCTAAATATCATGTACTTCCTCCGTTTGATAAAAAGAGAATCCTCTCGCCATCC
1810	ACGGATTATTAGATAATTAGATAGTAAAATAAGCAAATTAAATTGACTAA	CCACAAAGGGCCGAGTTAAG	AGAGAATCCTCTCGCCATCC	CCACAAAGGGCCGAGTTAAGACGGATTATTAGATAATTAGATAGTAAAATAAGCAAATTAAATTGACTAAAGAGAATCCTCTCGCCATCC
1811	ACCGAGGCTTTAAAGAAATACTACTAGTAGCACAAAATCATTAATATTGC	CCACAAAGGGCCGAGTTAAG	AGAGAATCCTCTCGCCATCC	CCACAAAGGGCCGAGTTAAGACCGAGGCTTTAAAGAAATACTACTAGTAGCACAAAATCATTAATATTGCAGAGAATCCTCTCGCCATCC
1812	TCTGGGAGTTGTTTTGTGTTTCATTTATTCTGGCTTTTAGGTTTCTGGTT	CCACAAAGGGCCGAGTTAAG	AGAGAATCCTCTCGCCATCC	CCACAAAGGGCCGAGTTAAGTCTGGGAGTTGTTTTGTGTTTCATTTATTCTGGCTTTTAGGTTTCTGGTTAGAGAATCCTCTCGCCATCC
1813	TTCACCTAATTAATCAACCTTTCCACTTTCAGGCATTTAGTTCATCAAAA	CCACAAAGGGCCGAGTTAAG	AGAGAATCCTCTCGCCATCC	CCACAAAGGGCCGAGTTAAGTTCACCTAATTAATCAACCTTTCCACTTTCAGGCATTTAGTTCATCAAAAAGAGAATCCTCTCGCCATCC
1814	GTAAGAAGCCTTCATATTCACATCTTATATCTTTTGGTTGCTTATGTTAG	CCACAAAGGGCCGAGTTAAG	AGAGAATCCTCTCGCCATCC	CCACAAAGGGCCGAGTTAAGGTAAGAAGCCTTCATATTCACATCTTATATCTTTTGGTTGCTTATGTTAGAGAGAATCCTCTCGCCATCC
1815	TGGCATATCTCTCACAGAAGTTTGATGCATAATTTCTTCTTCCAAAAGTA	CCACAAAGGGCCGAGTTAAG	AGAGAATCCTCTCGCCATCC	CCACAAAGGGCCGAGTTAAGTGGCATATCTCTCACAGAAGTTTGATGCATAATTTCTTCTTCCAAAAGTAAGAGAATCCTCTCGCCATCC
1816	TTTGTCTCTATGATCAAAACTCAATTTTCTACTACAGTTAAAACTTTCAA	CCACAAAGGGCCGAGTTAAG	AGAGAATCCTCTCGCCATCC	CCACAAAGGGCCGAGTTAAGTTTGTCTCTATGATCAAAACTCAATTTTCTACTACAGTTAAAACTTTCAAAGAGAATCCTCTCGCCATCC
1817	AGTATTCTTGAGGTGGGGTAATTGGTGAAGTTTATTCGGTATGATCAGGT	CCACAAAGGGCCGAGTTAAG	AGAGAATCCTCTCGCCATCC	CCACAAAGGGCCGAGTTAAGAGTATTCTTGAGGTGGGGTAATTGGTGAAGTTTATTCGGTATGATCAGGTAGAGAATCCTCTCGCCATCC
1818	GCCCTCAAAATAGAAAAGCAAAATAGTACGACCAACTGCAAGCATATATT	CCACAAAGGGCCGAGTTAAG	AGAGAATCCTCTCGCCATCC	CCACAAAGGGCCGAGTTAAGGCCCTCAAAATAGAAAAGCAAAATAGTACGACCAACTGCAAGCATATATTAGAGAATCCTCTCGCCATCC
1819	TGGCATCCAATAATATTAATCTCCAGGTAAATAGCAGTTTGGACCAGGTT	CCACAAAGGGCCGAGTTAAG	AGAGAATCCTCTCGCCATCC	CCACAAAGGGCCGAGTTAAGTGGCATCCAATAATATTAATCTCCAGGTAAATAGCAGTTTGGACCAGGTTAGAGAATCCTCTCGCCATCC
1820	AAGTAATGTAAAAGAAAGTTTAATGATCATAAATATATCCAAGCAACATA	CCACAAAGGGCCGAGTTAAG	AGAGAATCCTCTCGCCATCC	CCACAAAGGGCCGAGTTAAGAAGTAATGTAAAAGAAAGTTTAATGATCATAAATATATCCAAGCAACATAAGAGAATCCTCTCGCCATCC
1821	TATTAATATTTGATATTTGTAACTCCAAAATCTATCATCTCAAAGCCAGT	CCACAAAGGGCCGAGTTAAG	AGAGAATCCTCTCGCCATCC	CCACAAAGGGCCGAGTTAAGTATTAATATTTGATATTTGTAACTCCAAAATCTATCATCTCAAAGCCAGTAGAGAATCCTCTCGCCATCC
1822	AGAATGTCTATATATCATGTTGCACGTGTTACATATGATTATATTTAGTT	CCACAAAGGGCCGAGTTAAG	AGAGAATCCTCTCGCCATCC	CCACAAAGGGCCGAGTTAAGAGAATGTCTATATATCATGTTGCACGTGTTACATATGATTATATTTAGTTAGAGAATCCTCTCGCCATCC
1823	TGTTTAATATAGTCTCAAGTGAATAAACTGTCATATAATATTAAATGAAA	CCACAAAGGGCCGAGTTAAG	AGAGAATCCTCTCGCCATCC	CCACAAAGGGCCGAGTTAAGTGTTTAATATAGTCTCAAGTGAATAAACTGTCATATAATATTAAATGAAAAGAGAATCCTCTCGCCATCC
1824	GTGGCAGAATAGAGAAACGGGAGAATGCAAGTATATCTATCCCTATCTAG	CCACAAAGGGCCGAGTTAAG	AGAGAATCCTCTCGCCATCC	CCACAAAGGGCCGAGTTAAGGTGGCAGAATAGAGAAACGGGAGAATGCAAGTATATCTATCCCTATCTAGAGAGAATCCTCTCGCCATCC
1825	TTCCTTCTCTTGGGAACTAAAAGTTTCATTCATGCCTTCTCTCTCCTACT	CCACAAAGGGCCGAGTTAAG	AGAGAATCCTCTCGCCATCC	CCACAAAGGGCCGAGTTAAGTTCCTTCTCTTGGGAACTAAAAGTTTCATTCATGCCTTCTCTCTCCTACTAGAGAATCCTCTCGCCATCC
1826	GATCTGTCTCACTCAACTTCGTTTCCCACTTGTGATGCAGTTACATGTCG	CCACAAAGGGCCGAGTTAAG	AGAGAATCCTCTCGCCATCC	CCACAAAGGGCCGAGTTAAGGATCTGTCTCACTCAACTTCGTTTCCCACTTGTGATGCAGTTACATGTCGAGAGAATCCTCTCGCCATCC
1827	ATACACCATAAATGAGCTAATATTGCAGTAGTTTCCAAGTTACCCAATTG	CCACAAAGGGCCGAGTTAAG	AGAGAATCCTCTCGCCATCC	CCACAAAGGGCCGAGTTAAGATACACCATAAATGAGCTAATATTGCAGTAGTTTCCAAGTTACCCAATTGAGAGAATCCTCTCGCCATCC
1828	AAAGATGGTTTTGTAACTCGTGATGGGGTTTTATGCAAGTGCTGTAATGA	CCACAAAGGGCCGAGTTAAG	AGAGAATCCTCTCGCCATCC	CCACAAAGGGCCGAGTTAAGAAAGATGGTTTTGTAACTCGTGATGGGGTTTTATGCAAGTGCTGTAATGAAGAGAATCCTCTCGCCATCC
1829	AAAATTGACAAACAAATTCAGGTGGATACAGTCATCGTTTAAAGCACACA	CCACAAAGGGCCGAGTTAAG	AGAGAATCCTCTCGCCATCC	CCACAAAGGGCCGAGTTAAGAAAATTGACAAACAAATTCAGGTGGATACAGTCATCGTTTAAAGCACACAAGAGAATCCTCTCGCCATCC
1830	GCTTTTCACTTCTATAATTTGAGAGATTATTGTCCATGTTCTGGGGCAGA	CCACAAAGGGCCGAGTTAAG	AGAGAATCCTCTCGCCATCC	CCACAAAGGGCCGAGTTAAGGCTTTTCACTTCTATAATTTGAGAGATTATTGTCCATGTTCTGGGGCAGAAGAGAATCCTCTCGCCATCC
1831	TTCCGCTCATCCATGTAACATTTTCTTGGAAGTGTCTTTACGAAATTGCA	CCACAAAGGGCCGAGTTAAG	AGAGAATCCTCTCGCCATCC	CCACAAAGGGCCGAGTTAAGTTCCGCTCATCCATGTAACATTTTCTTGGAAGTGTCTTTACGAAATTGCAAGAGAATCCTCTCGCCATCC
1832	ATTTGAAATAAGGAGTAGAATTTTGGCATGAGAAAGGCAACCTAGTGAAG	CCACAAAGGGCCGAGTTAAG	AGAGAATCCTCTCGCCATCC	CCACAAAGGGCCGAGTTAAGATTTGAAATAAGGAGTAGAATTTTGGCATGAGAAAGGCAACCTAGTGAAGAGAGAATCCTCTCGCCATCC
1833	TGCTTTAATTTGCTTAAAACTGACCAAACTTATCTGTAACACAAGTTTTA	CCACAAAGGGCCGAGTTAAG	AGAGAATCCTCTCGCCATCC	CCACAAAGGGCCGAGTTAAGTGCTTTAATTTGCTTAAAACTGACCAAACTTATCTGTAACACAAGTTTTAAGAGAATCCTCTCGCCATCC
1834	GAGCCATTAAAATTCTTGGAATCTCTGAATGGTGCTTTGATGTCGGAATA	CCACAAAGGGCCGAGTTAAG	AGAGAATCCTCTCGCCATCC	CCACAAAGGGCCGAGTTAAGGAGCCATTAAAATTCTTGGAATCTCTGAATGGTGCTTTGATGTCGGAATAAGAGAATCCTCTCGCCATCC
1835	CCACAAGAAAGGAGAGAAGTAATACATCTAACCTGCTTTCTGGCCCAACT	CCACAAAGGGCCGAGTTAAG	AGAGAATCCTCTCGCCATCC	CCACAAAGGGCCGAGTTAAGCCACAAGAAAGGAGAGAAGTAATACATCTAACCTGCTTTCTGGCCCAACTAGAGAATCCTCTCGCCATCC
1836	TACAATGGATATGATGAATTAGGTAGTATAAACTATTTCACTCAATGAAT	CCACAAAGGGCCGAGTTAAG	AGAGAATCCTCTCGCCATCC	CCACAAAGGGCCGAGTTAAGTACAATGGATATGATGAATTAGGTAGTATAAACTATTTCACTCAATGAATAGAGAATCCTCTCGCCATCC
1837	TGTTAAAATCACTATAACAACAAAGAAGGCAGATTGATTAAGGAACAAAT	CCACAAAGGGCCGAGTTAAG	AGAGAATCCTCTCGCCATCC	CCACAAAGGGCCGAGTTAAGTGTTAAAATCACTATAACAACAAAGAAGGCAGATTGATTAAGGAACAAATAGAGAATCCTCTCGCCATCC
1838	AAGCACGCTTATTTTAGAAAGTAGGAAATTTAACTTTTGATATCCTAAAG	CCACAAAGGGCCGAGTTAAG	AGAGAATCCTCTCGCCATCC	CCACAAAGGGCCGAGTTAAGAAGCACGCTTATTTTAGAAAGTAGGAAATTTAACTTTTGATATCCTAAAGAGAGAATCCTCTCGCCATCC
1839	CACGACTGCCACATCTTCTCCTAACATCTATTGATACATTTAATACTCCC	CCACAAAGGGCCGAGTTAAG	AGAGAATCCTCTCGCCATCC	CCACAAAGGGCCGAGTTAAGCACGACTGCCACATCTTCTCCTAACATCTATTGATACATTTAATACTCCCAGAGAATCCTCTCGCCATCC
1840	TTTCCATACTTGTATATGTTCAGTGATTGATGATATATATAAATGAATCT	CCACAAAGGGCCGAGTTAAG	AGAGAATCCTCTCGCCATCC	CCACAAAGGGCCGAGTTAAGTTTCCATACTTGTATATGTTCAGTGATTGATGATATATATAAATGAATCTAGAGAATCCTCTCGCCATCC
1841	TTCTATTCTTGTATTTCCTCGGCAAATTTCCAAATGTTTCAATTATATAT	CCACAAAGGGCCGAGTTAAG	AGAGAATCCTCTCGCCATCC	CCACAAAGGGCCGAGTTAAGTTCTATTCTTGTATTTCCTCGGCAAATTTCCAAATGTTTCAATTATATATAGAGAATCCTCTCGCCATCC
1842	TGGATATTTATTGCCATTTATCTAACTCATCACTACTGCACCATGTCCCT	CCACAAAGGGCCGAGTTAAG	AGAGAATCCTCTCGCCATCC	CCACAAAGGGCCGAGTTAAGTGGATATTTATTGCCATTTATCTAACTCATCACTACTGCACCATGTCCCTAGAGAATCCTCTCGCCATCC
1843	TAGCTCTGCTCTTCCCGTAGACATGGATTGACTCAATTACCAAGCTGGCA	CCACAAAGGGCCGAGTTAAG	AGAGAATCCTCTCGCCATCC	CCACAAAGGGCCGAGTTAAGTAGCTCTGCTCTTCCCGTAGACATGGATTGACTCAATTACCAAGCTGGCAAGAGAATCCTCTCGCCATCC
1844	GATAGTCTGTTTGAGATCTAACTTTATGTGGATTAGACATGTAACCAGCA	CCACAAAGGGCCGAGTTAAG	AGAGAATCCTCTCGCCATCC	CCACAAAGGGCCGAGTTAAGGATAGTCTGTTTGAGATCTAACTTTATGTGGATTAGACATGTAACCAGCAAGAGAATCCTCTCGCCATCC
1845	ACCCTTTTGAACTTTGAGACATCCCAAGTTTTAAGAATCTTGTTTGGCTA	CCACAAAGGGCCGAGTTAAG	AGAGAATCCTCTCGCCATCC	CCACAAAGGGCCGAGTTAAGACCCTTTTGAACTTTGAGACATCCCAAGTTTTAAGAATCTTGTTTGGCTAAGAGAATCCTCTCGCCATCC
1846	CTTAATTAGTCCAACGTAGTAGTCCCATTTATAAGGTTATGAGTTTAAAA	CCACAAAGGGCCGAGTTAAG	AGAGAATCCTCTCGCCATCC	CCACAAAGGGCCGAGTTAAGCTTAATTAGTCCAACGTAGTAGTCCCATTTATAAGGTTATGAGTTTAAAAAGAGAATCCTCTCGCCATCC
1847	AAAGCTCAAACATCGAATAATAGAAAGTATACGTCACTATCACTTGCATC	CCACAAAGGGCCGAGTTAAG	AGAGAATCCTCTCGCCATCC	CCACAAAGGGCCGAGTTAAGAAAGCTCAAACATCGAATAATAGAAAGTATACGTCACTATCACTTGCATCAGAGAATCCTCTCGCCATCC
1848	GAAGGAACAGGAAACAACAAACCAACACAAACAACACAAAACAGCAAGAA	CCACAAAGGGCCGAGTTAAG	AGAGAATCCTCTCGCCATCC	CCACAAAGGGCCGAGTTAAGGAAGGAACAGGAAACAACAAACCAACACAAACAACACAAAACAGCAAGAAAGAGAATCCTCTCGCCATCC
1849	AAGGGTAACAAAGGTGTGATTCCAAGATTTTAAGAGATAGCCGGAAACAA	CCACAAAGGGCCGAGTTAAG	AGAGAATCCTCTCGCCATCC	CCACAAAGGGCCGAGTTAAGAAGGGTAACAAAGGTGTGATTCCAAGATTTTAAGAGATAGCCGGAAACAAAGAGAATCCTCTCGCCATCC
1850	AAGTTATGTTTTACTATTTTAGGTTAACAAATGATTAAACATACAACAAA	CCACAAAGGGCCGAGTTAAG	AGAGAATCCTCTCGCCATCC	CCACAAAGGGCCGAGTTAAGAAGTTATGTTTTACTATTTTAGGTTAACAAATGATTAAACATACAACAAAAGAGAATCCTCTCGCCATCC
1851	AAGTTAGCAAAGATTCAGTTAAATTTTATAGGATATTTAGATGGGATTCT	CCACAAAGGGCCGAGTTAAG	AGAGAATCCTCTCGCCATCC	CCACAAAGGGCCGAGTTAAGAAGTTAGCAAAGATTCAGTTAAATTTTATAGGATATTTAGATGGGATTCTAGAGAATCCTCTCGCCATCC
1852	TGGAATCGGACTGCCAAGTTATTGTTACTCAAATCAATGGGAGTTTACAG	CCACAAAGGGCCGAGTTAAG	AGAGAATCCTCTCGCCATCC	CCACAAAGGGCCGAGTTAAGTGGAATCGGACTGCCAAGTTATTGTTACTCAAATCAATGGGAGTTTACAGAGAGAATCCTCTCGCCATCC
1853	AACTTGGTCCTATTTCTTAAATTTTATACAACTTAGTCCTTTAACTATTT	CCACAAAGGGCCGAGTTAAG	AGAGAATCCTCTCGCCATCC	CCACAAAGGGCCGAGTTAAGAACTTGGTCCTATTTCTTAAATTTTATACAACTTAGTCCTTTAACTATTTAGAGAATCCTCTCGCCATCC
1854	GATTTGGTTTCTTTTACCTAGGTGTCTCATATGGTTTGTTAAGTGAGGGA	CCACAAAGGGCCGAGTTAAG	AGAGAATCCTCTCGCCATCC	CCACAAAGGGCCGAGTTAAGGATTTGGTTTCTTTTACCTAGGTGTCTCATATGGTTTGTTAAGTGAGGGAAGAGAATCCTCTCGCCATCC
1855	TTTCGTATAATTATTCTACAAAGACAATACAATGCTTTGACAATCAATTC	CCACAAAGGGCCGAGTTAAG	AGAGAATCCTCTCGCCATCC	CCACAAAGGGCCGAGTTAAGTTTCGTATAATTATTCTACAAAGACAATACAATGCTTTGACAATCAATTCAGAGAATCCTCTCGCCATCC
1856	ATTTTAAAAGGCAGAATATGAAAATGTTAAAATTAATGAGGGTAGATTAT	CCACAAAGGGCCGAGTTAAG	AGAGAATCCTCTCGCCATCC	CCACAAAGGGCCGAGTTAAGATTTTAAAAGGCAGAATATGAAAATGTTAAAATTAATGAGGGTAGATTATAGAGAATCCTCTCGCCATCC
1857	TTCCAATACTGATAACTAAAATTATTGTAGCATCTTCCACATCAATTAAT	CCACAAAGGGCCGAGTTAAG	AGAGAATCCTCTCGCCATCC	CCACAAAGGGCCGAGTTAAGTTCCAATACTGATAACTAAAATTATTGTAGCATCTTCCACATCAATTAATAGAGAATCCTCTCGCCATCC
1858	TTTGTATTTTCTTAAAGTTTGGTTAGACTATAAATAAAAGTGCATCTATA	CCACAAAGGGCCGAGTTAAG	AGAGAATCCTCTCGCCATCC	CCACAAAGGGCCGAGTTAAGTTTGTATTTTCTTAAAGTTTGGTTAGACTATAAATAAAAGTGCATCTATAAGAGAATCCTCTCGCCATCC
1859	GGTTCGAGTTCCGTCACTTCACCGCCGATGAATGTACTTCCCACCGGTAA	CCACAAAGGGCCGAGTTAAG	AGAGAATCCTCTCGCCATCC	CCACAAAGGGCCGAGTTAAGGGTTCGAGTTCCGTCACTTCACCGCCGATGAATGTACTTCCCACCGGTAAAGAGAATCCTCTCGCCATCC
1860	AGCAATGATCCCGAAGAGTTGAAAAGGATAGGAAACGACAATTACAAGAA	CCACAAAGGGCCGAGTTAAG	AGAGAATCCTCTCGCCATCC	CCACAAAGGGCCGAGTTAAGAGCAATGATCCCGAAGAGTTGAAAAGGATAGGAAACGACAATTACAAGAAAGAGAATCCTCTCGCCATCC
1861	AGCTCTCTTGAAACTCCACCGGGTAGATGATGCTGATTTATGCCTATCAA	CCACAAAGGGCCGAGTTAAG	AGAGAATCCTCTCGCCATCC	CCACAAAGGGCCGAGTTAAGAGCTCTCTTGAAACTCCACCGGGTAGATGATGCTGATTTATGCCTATCAAAGAGAATCCTCTCGCCATCC
1862	TAGAGCACAAATTGACTTGGCACTTGGAAGGTATGTCGAGAATTATGCTT	CCACAAAGGGCCGAGTTAAG	AGAGAATCCTCTCGCCATCC	CCACAAAGGGCCGAGTTAAGTAGAGCACAAATTGACTTGGCACTTGGAAGGTATGTCGAGAATTATGCTTAGAGAATCCTCTCGCCATCC
1863	CCAGAAGTTCACCAGGAGAAGAAATTGCTGCTCGGAACTGCTCAAGACTT	CCACAAAGGGCCGAGTTAAG	AGAGAATCCTCTCGCCATCC	CCACAAAGGGCCGAGTTAAGCCAGAAGTTCACCAGGAGAAGAAATTGCTGCTCGGAACTGCTCAAGACTTAGAGAATCCTCTCGCCATCC
1864	AAATACAAGTAAAACGAGATAGAAGGAGCACGTTGTTTTATCTCACGCTA	CCACAAAGGGCCGAGTTAAG	AGAGAATCCTCTCGCCATCC	CCACAAAGGGCCGAGTTAAGAAATACAAGTAAAACGAGATAGAAGGAGCACGTTGTTTTATCTCACGCTAAGAGAATCCTCTCGCCATCC
1865	GTCAGGTACTTACAATAATTATATGAATAGTTCTGGGTAAGAGTTTACAG	CCACAAAGGGCCGAGTTAAG	AGAGAATCCTCTCGCCATCC	CCACAAAGGGCCGAGTTAAGGTCAGGTACTTACAATAATTATATGAATAGTTCTGGGTAAGAGTTTACAGAGAGAATCCTCTCGCCATCC
1866	AATTGTTCTCATTGGGAATGTAGTCATCCGAGGATAATTTGTTTTCTTTT	CCACAAAGGGCCGAGTTAAG	AGAGAATCCTCTCGCCATCC	CCACAAAGGGCCGAGTTAAGAATTGTTCTCATTGGGAATGTAGTCATCCGAGGATAATTTGTTTTCTTTTAGAGAATCCTCTCGCCATCC
1867	GTTTGCTAACGAATGATTTGAGAATTTTATCATGGAACATCTGCTATATT	CCACAAAGGGCCGAGTTAAG	AGAGAATCCTCTCGCCATCC	CCACAAAGGGCCGAGTTAAGGTTTGCTAACGAATGATTTGAGAATTTTATCATGGAACATCTGCTATATTAGAGAATCCTCTCGCCATCC
1868	TAATGAAGGGTTTGATGTGGAGAAACATAAAATACCTTTTGCAAACCCAA	CCACAAAGGGCCGAGTTAAG	AGAGAATCCTCTCGCCATCC	CCACAAAGGGCCGAGTTAAGTAATGAAGGGTTTGATGTGGAGAAACATAAAATACCTTTTGCAAACCCAAAGAGAATCCTCTCGCCATCC
1869	AAAGGAACTAATGAAAATGAAATAAACAGAAGGCAATAACCAGGTGGAGA	CCACAAAGGGCCGAGTTAAG	AGAGAATCCTCTCGCCATCC	CCACAAAGGGCCGAGTTAAGAAAGGAACTAATGAAAATGAAATAAACAGAAGGCAATAACCAGGTGGAGAAGAGAATCCTCTCGCCATCC
1870	TCTTCGAGAGCCGTGGACTTGATCTCTAAGAGAGGATGTGTTGGAGCTTT	CCACAAAGGGCCGAGTTAAG	AGAGAATCCTCTCGCCATCC	CCACAAAGGGCCGAGTTAAGTCTTCGAGAGCCGTGGACTTGATCTCTAAGAGAGGATGTGTTGGAGCTTTAGAGAATCCTCTCGCCATCC
1871	AACACTACTTCTCGGTAAGCAGTATGGGGCAATATGGAATCATCAGAATA	CCACAAAGGGCCGAGTTAAG	AGAGAATCCTCTCGCCATCC	CCACAAAGGGCCGAGTTAAGAACACTACTTCTCGGTAAGCAGTATGGGGCAATATGGAATCATCAGAATAAGAGAATCCTCTCGCCATCC
1872	ATATTCATAGTCAACTCAGATACCTCTTTTGATACAATATTAAGGACAAT	CCACAAAGGGCCGAGTTAAG	AGAGAATCCTCTCGCCATCC	CCACAAAGGGCCGAGTTAAGATATTCATAGTCAACTCAGATACCTCTTTTGATACAATATTAAGGACAATAGAGAATCCTCTCGCCATCC
1873	TGCTTTGGATGACATTTAGTGCATCTCCTTCCATCATGATGTTTTCATTT	CCACAAAGGGCCGAGTTAAG	AGAGAATCCTCTCGCCATCC	CCACAAAGGGCCGAGTTAAGTGCTTTGGATGACATTTAGTGCATCTCCTTCCATCATGATGTTTTCATTTAGAGAATCCTCTCGCCATCC
1874	CAACAGTCGATTCTAGAAGAGGGTTACTAGTTAGTGGAGCATATGTATAT	CCACAAAGGGCCGAGTTAAG	AGAGAATCCTCTCGCCATCC	CCACAAAGGGCCGAGTTAAGCAACAGTCGATTCTAGAAGAGGGTTACTAGTTAGTGGAGCATATGTATATAGAGAATCCTCTCGCCATCC
1875	ACAAATGACGTCATCCTAAGGTATCACACTAGAGTATGGTATGGTAATGG	CCACAAAGGGCCGAGTTAAG	AGAGAATCCTCTCGCCATCC	CCACAAAGGGCCGAGTTAAGACAAATGACGTCATCCTAAGGTATCACACTAGAGTATGGTATGGTAATGGAGAGAATCCTCTCGCCATCC
1876	CAAACAACAAAATAATCTCAACCTAAAGAACTCGATAAATATGGAAACTC	CCACAAAGGGCCGAGTTAAG	AGAGAATCCTCTCGCCATCC	CCACAAAGGGCCGAGTTAAGCAAACAACAAAATAATCTCAACCTAAAGAACTCGATAAATATGGAAACTCAGAGAATCCTCTCGCCATCC
1877	AATTTCAATAAGTGAGAAAATCTTGTGTATTGCGCTTCATTTGAGCCTTT	CCACAAAGGGCCGAGTTAAG	AGAGAATCCTCTCGCCATCC	CCACAAAGGGCCGAGTTAAGAATTTCAATAAGTGAGAAAATCTTGTGTATTGCGCTTCATTTGAGCCTTTAGAGAATCCTCTCGCCATCC
1878	GCGCCCTTATCTGTCTCGAGGAAGTGACTTGACAACTTGGGAGGTAAATT	CCACAAAGGGCCGAGTTAAG	AGAGAATCCTCTCGCCATCC	CCACAAAGGGCCGAGTTAAGGCGCCCTTATCTGTCTCGAGGAAGTGACTTGACAACTTGGGAGGTAAATTAGAGAATCCTCTCGCCATCC
1879	GGAACTTCTGTATGCTTTCCTTTGGTCTTTCCTTCCTGTTACGAAGAACA	CCACAAAGGGCCGAGTTAAG	AGAGAATCCTCTCGCCATCC	CCACAAAGGGCCGAGTTAAGGGAACTTCTGTATGCTTTCCTTTGGTCTTTCCTTCCTGTTACGAAGAACAAGAGAATCCTCTCGCCATCC
1880	AAAGATTCTAACAGCATAAAACACTCTCACCTGAAATATTGAAAATCATT	CCACAAAGGGCCGAGTTAAG	AGAGAATCCTCTCGCCATCC	CCACAAAGGGCCGAGTTAAGAAAGATTCTAACAGCATAAAACACTCTCACCTGAAATATTGAAAATCATTAGAGAATCCTCTCGCCATCC
1881	ATCTATATGCTATAATTGCTTTTGACGATATTTGATGTGTCACTGGAGCT	CCACAAAGGGCCGAGTTAAG	AGAGAATCCTCTCGCCATCC	CCACAAAGGGCCGAGTTAAGATCTATATGCTATAATTGCTTTTGACGATATTTGATGTGTCACTGGAGCTAGAGAATCCTCTCGCCATCC
1882	GCTGCATTATCACTACTTTTCTCCTTGTTGGTTCGCTATTTCTTGAAGCA	CCACAAAGGGCCGAGTTAAG	AGAGAATCCTCTCGCCATCC	CCACAAAGGGCCGAGTTAAGGCTGCATTATCACTACTTTTCTCCTTGTTGGTTCGCTATTTCTTGAAGCAAGAGAATCCTCTCGCCATCC
1883	CTTGAGGGAAGTCATTGAAGCGCGAATGGTCAGACCTTTGCCGCCGACGC	CCACAAAGGGCCGAGTTAAG	AGAGAATCCTCTCGCCATCC	CCACAAAGGGCCGAGTTAAGCTTGAGGGAAGTCATTGAAGCGCGAATGGTCAGACCTTTGCCGCCGACGCAGAGAATCCTCTCGCCATCC
1884	GGTCTCCTTCCGTAACCAGAGTTTTGTATTCGATCAGTAGCTTTTCTCTT	CCACAAAGGGCCGAGTTAAG	AGAGAATCCTCTCGCCATCC	CCACAAAGGGCCGAGTTAAGGGTCTCCTTCCGTAACCAGAGTTTTGTATTCGATCAGTAGCTTTTCTCTTAGAGAATCCTCTCGCCATCC
1885	GCCTGGAAGACACAATCATCTTGACCATGAAGGGCATTGCTGCTGGAATG	CCACAAAGGGCCGAGTTAAG	AGAGAATCCTCTCGCCATCC	CCACAAAGGGCCGAGTTAAGGCCTGGAAGACACAATCATCTTGACCATGAAGGGCATTGCTGCTGGAATGAGAGAATCCTCTCGCCATCC
1886	TGGCTCGGTGTTGGTGCAGCTTTCAAATATGCGATCAAGAAGGATATCAA	CCACAAAGGGCCGAGTTAAG	AGAGAATCCTCTCGCCATCC	CCACAAAGGGCCGAGTTAAGTGGCTCGGTGTTGGTGCAGCTTTCAAATATGCGATCAAGAAGGATATCAAAGAGAATCCTCTCGCCATCC
1887	CTTGATTACCTTTTGGCTGCTTAGCTTATAGTTGATAATTTTACTGAAAA	CCACAAAGGGCCGAGTTAAG	AGAGAATCCTCTCGCCATCC	CCACAAAGGGCCGAGTTAAGCTTGATTACCTTTTGGCTGCTTAGCTTATAGTTGATAATTTTACTGAAAAAGAGAATCCTCTCGCCATCC
1888	CAAACATCCCTTGTAACCTCAGGAGTTACTCTTGGATTACCTATAAAGGA	CCACAAAGGGCCGAGTTAAG	AGAGAATCCTCTCGCCATCC	CCACAAAGGGCCGAGTTAAGCAAACATCCCTTGTAACCTCAGGAGTTACTCTTGGATTACCTATAAAGGAAGAGAATCCTCTCGCCATCC
1889	TTTATGTAGACATGCTAATCATAAGTTCTGTGTAGGAACCCGTATTAGAA	CCACAAAGGGCCGAGTTAAG	AGAGAATCCTCTCGCCATCC	CCACAAAGGGCCGAGTTAAGTTTATGTAGACATGCTAATCATAAGTTCTGTGTAGGAACCCGTATTAGAAAGAGAATCCTCTCGCCATCC
1890	AACAATGTCCCAACAAAGAATCGTAAAAGACAGAAATATGACAACCATAG	CCACAAAGGGCCGAGTTAAG	AGAGAATCCTCTCGCCATCC	CCACAAAGGGCCGAGTTAAGAACAATGTCCCAACAAAGAATCGTAAAAGACAGAAATATGACAACCATAGAGAGAATCCTCTCGCCATCC
1891	ATATTATTACAACTGTTATTTGCCTAAAACATATTCAAGAAAGAACAATT	CCACAAAGGGCCGAGTTAAG	AGAGAATCCTCTCGCCATCC	CCACAAAGGGCCGAGTTAAGATATTATTACAACTGTTATTTGCCTAAAACATATTCAAGAAAGAACAATTAGAGAATCCTCTCGCCATCC
1892	TACAAATAAAGTAGAAGAATAACATAGTCAATAATTGAGGCAACTTATCG	CCACAAAGGGCCGAGTTAAG	AGAGAATCCTCTCGCCATCC	CCACAAAGGGCCGAGTTAAGTACAAATAAAGTAGAAGAATAACATAGTCAATAATTGAGGCAACTTATCGAGAGAATCCTCTCGCCATCC
1893	AATTTAGATTTCTTGATCAACATTAATACAGTTTTATATTAATTTCAAAT	CCACAAAGGGCCGAGTTAAG	AGAGAATCCTCTCGCCATCC	CCACAAAGGGCCGAGTTAAGAATTTAGATTTCTTGATCAACATTAATACAGTTTTATATTAATTTCAAATAGAGAATCCTCTCGCCATCC
1894	AATTCGGAAACTTCGTTGCAGAATATAACGCCACCTACCGTGCACTCAAC	CCACAAAGGGCCGAGTTAAG	AGAGAATCCTCTCGCCATCC	CCACAAAGGGCCGAGTTAAGAATTCGGAAACTTCGTTGCAGAATATAACGCCACCTACCGTGCACTCAACAGAGAATCCTCTCGCCATCC
1895	CTATTAATATGGGTTTTGTTATATGCTAATAGTTTCAAAATACAACTCGT	CCACAAAGGGCCGAGTTAAG	AGAGAATCCTCTCGCCATCC	CCACAAAGGGCCGAGTTAAGCTATTAATATGGGTTTTGTTATATGCTAATAGTTTCAAAATACAACTCGTAGAGAATCCTCTCGCCATCC
1896	TATAAGGATATGAAATTAGGCATGTCAATGGATTATGAAATTAGTATATT	CCACAAAGGGCCGAGTTAAG	AGAGAATCCTCTCGCCATCC	CCACAAAGGGCCGAGTTAAGTATAAGGATATGAAATTAGGCATGTCAATGGATTATGAAATTAGTATATTAGAGAATCCTCTCGCCATCC
1897	AATTGATCAATTTAAATTAGATTTTAGAGATAAAATGATAGAGCATTAGC	CCACAAAGGGCCGAGTTAAG	AGAGAATCCTCTCGCCATCC	CCACAAAGGGCCGAGTTAAGAATTGATCAATTTAAATTAGATTTTAGAGATAAAATGATAGAGCATTAGCAGAGAATCCTCTCGCCATCC
1898	ACATTATCACTCATGAAAAGTACATATTTACATATTTTAAATGTTACACG	CCACAAAGGGCCGAGTTAAG	AGAGAATCCTCTCGCCATCC	CCACAAAGGGCCGAGTTAAGACATTATCACTCATGAAAAGTACATATTTACATATTTTAAATGTTACACGAGAGAATCCTCTCGCCATCC
1899	CCAAGTTTCTTCCCTTAAAGTAATTCGCAATTTATCAACAAGCCCTGGAT	CCACAAAGGGCCGAGTTAAG	AGAGAATCCTCTCGCCATCC	CCACAAAGGGCCGAGTTAAGCCAAGTTTCTTCCCTTAAAGTAATTCGCAATTTATCAACAAGCCCTGGATAGAGAATCCTCTCGCCATCC
1900	GTCCAACCAAGAGAGTATCAGTAGGTGAATCGAAGCTTTGCCAAAGGAAT	CCACAAAGGGCCGAGTTAAG	AGAGAATCCTCTCGCCATCC	CCACAAAGGGCCGAGTTAAGGTCCAACCAAGAGAGTATCAGTAGGTGAATCGAAGCTTTGCCAAAGGAATAGAGAATCCTCTCGCCATCC
1901	TTTTACTACAATGATAAAATTATAAGTTCTAGAGTAATCATTTAGTTATT	CCACAAAGGGCCGAGTTAAG	AGAGAATCCTCTCGCCATCC	CCACAAAGGGCCGAGTTAAGTTTTACTACAATGATAAAATTATAAGTTCTAGAGTAATCATTTAGTTATTAGAGAATCCTCTCGCCATCC
1902	AATGAGTTGTTATAGAATTATGCATTATTCACATTCAAACATTACAAGTC	CCACAAAGGGCCGAGTTAAG	AGAGAATCCTCTCGCCATCC	CCACAAAGGGCCGAGTTAAGAATGAGTTGTTATAGAATTATGCATTATTCACATTCAAACATTACAAGTCAGAGAATCCTCTCGCCATCC
1903	GTGGCGCACGAGTGTATTTGCTCTCAACTTGCCATCTTTCCATCTTTGAA	CCACAAAGGGCCGAGTTAAG	AGAGAATCCTCTCGCCATCC	CCACAAAGGGCCGAGTTAAGGTGGCGCACGAGTGTATTTGCTCTCAACTTGCCATCTTTCCATCTTTGAAAGAGAATCCTCTCGCCATCC
1904	TGTATATAGTTATGTTTGATGAGACTTTTCAATTACAACATATATCTAAA	CCACAAAGGGCCGAGTTAAG	AGAGAATCCTCTCGCCATCC	CCACAAAGGGCCGAGTTAAGTGTATATAGTTATGTTTGATGAGACTTTTCAATTACAACATATATCTAAAAGAGAATCCTCTCGCCATCC
1905	AATCTCAATCATTTTCCCTCCTTATTGTATTCTACTTCTTGTTCGTTATA	CCACAAAGGGCCGAGTTAAG	AGAGAATCCTCTCGCCATCC	CCACAAAGGGCCGAGTTAAGAATCTCAATCATTTTCCCTCCTTATTGTATTCTACTTCTTGTTCGTTATAAGAGAATCCTCTCGCCATCC
1906	TCTATATTAATGTCATGATTACATATGTTTAATTGAATATTTGATCAACA	CCACAAAGGGCCGAGTTAAG	AGAGAATCCTCTCGCCATCC	CCACAAAGGGCCGAGTTAAGTCTATATTAATGTCATGATTACATATGTTTAATTGAATATTTGATCAACAAGAGAATCCTCTCGCCATCC
1907	TAAAGAACAATTTGATCTCATAACATGGTAGTCAAAGCTTCAATAATTCT	CCACAAAGGGCCGAGTTAAG	AGAGAATCCTCTCGCCATCC	CCACAAAGGGCCGAGTTAAGTAAAGAACAATTTGATCTCATAACATGGTAGTCAAAGCTTCAATAATTCTAGAGAATCCTCTCGCCATCC
1908	ACAGACAACTAAATATCTCCATCGGATTCGCACTACCTCTCCAAGTTTCT	CCACAAAGGGCCGAGTTAAG	AGAGAATCCTCTCGCCATCC	CCACAAAGGGCCGAGTTAAGACAGACAACTAAATATCTCCATCGGATTCGCACTACCTCTCCAAGTTTCTAGAGAATCCTCTCGCCATCC
1909	CATGGATGATTGCCATCTTTGTGGAAAAGACAAGAGAAGAGCTGGCGACC	CCACAAAGGGCCGAGTTAAG	AGAGAATCCTCTCGCCATCC	CCACAAAGGGCCGAGTTAAGCATGGATGATTGCCATCTTTGTGGAAAAGACAAGAGAAGAGCTGGCGACCAGAGAATCCTCTCGCCATCC
1910	ATCTAATTAAGGCTACCTGTATTTTCAGTACATTGTTTTGGAATGATTAA	CCACAAAGGGCCGAGTTAAG	AGAGAATCCTCTCGCCATCC	CCACAAAGGGCCGAGTTAAGATCTAATTAAGGCTACCTGTATTTTCAGTACATTGTTTTGGAATGATTAAAGAGAATCCTCTCGCCATCC
1911	TGGCAATCAAGGCTGCAAAACTGTCTCGAACAATCACCAACTGAAGCAGA	CCACAAAGGGCCGAGTTAAG	AGAGAATCCTCTCGCCATCC	CCACAAAGGGCCGAGTTAAGTGGCAATCAAGGCTGCAAAACTGTCTCGAACAATCACCAACTGAAGCAGAAGAGAATCCTCTCGCCATCC
1912	GGCATTCAAAGCTTTACTACCCTTATTTACATTCCTATTCTTCTTTCTCG	CCACAAAGGGCCGAGTTAAG	AGAGAATCCTCTCGCCATCC	CCACAAAGGGCCGAGTTAAGGGCATTCAAAGCTTTACTACCCTTATTTACATTCCTATTCTTCTTTCTCGAGAGAATCCTCTCGCCATCC
1913	TGCCGAGGACGAAAGCATTTGGGGTGGTGTTGTAGAAGCACAGCGTATAA	CCACAAAGGGCCGAGTTAAG	AGAGAATCCTCTCGCCATCC	CCACAAAGGGCCGAGTTAAGTGCCGAGGACGAAAGCATTTGGGGTGGTGTTGTAGAAGCACAGCGTATAAAGAGAATCCTCTCGCCATCC
1914	TATATTTTCCATTGGTTCCATCCACATCAGAGGTCCGGCTAACGAGTTTA	CCACAAAGGGCCGAGTTAAG	AGAGAATCCTCTCGCCATCC	CCACAAAGGGCCGAGTTAAGTATATTTTCCATTGGTTCCATCCACATCAGAGGTCCGGCTAACGAGTTTAAGAGAATCCTCTCGCCATCC
1915	CCAACTGAAATTTTGTTCTTAATCAGCAATTCATGGAACAAGCAGACAAG	CCACAAAGGGCCGAGTTAAG	AGAGAATCCTCTCGCCATCC	CCACAAAGGGCCGAGTTAAGCCAACTGAAATTTTGTTCTTAATCAGCAATTCATGGAACAAGCAGACAAGAGAGAATCCTCTCGCCATCC
1916	ATATTTCAGTTTTCCCAACACACAAAGTTCTTGATCATCATTCACTTAAT	CCACAAAGGGCCGAGTTAAG	AGAGAATCCTCTCGCCATCC	CCACAAAGGGCCGAGTTAAGATATTTCAGTTTTCCCAACACACAAAGTTCTTGATCATCATTCACTTAATAGAGAATCCTCTCGCCATCC
1917	CCTTCTTCTAACATAGTATCAAAGTGGAAGATCCTGAGTTCGAACCCCTT	CCACAAAGGGCCGAGTTAAG	AGAGAATCCTCTCGCCATCC	CCACAAAGGGCCGAGTTAAGCCTTCTTCTAACATAGTATCAAAGTGGAAGATCCTGAGTTCGAACCCCTTAGAGAATCCTCTCGCCATCC
1918	AAACACTATTAGAATTTTAGTCAAATAGAGAAGGATTAAATTTATATTCT	CCACAAAGGGCCGAGTTAAG	AGAGAATCCTCTCGCCATCC	CCACAAAGGGCCGAGTTAAGAAACACTATTAGAATTTTAGTCAAATAGAGAAGGATTAAATTTATATTCTAGAGAATCCTCTCGCCATCC
1919	CATGACTATAGAAAAGAGAAACAGGAACAGTGCTAAAATCTCATACTTCA	CCACAAAGGGCCGAGTTAAG	AGAGAATCCTCTCGCCATCC	CCACAAAGGGCCGAGTTAAGCATGACTATAGAAAAGAGAAACAGGAACAGTGCTAAAATCTCATACTTCAAGAGAATCCTCTCGCCATCC
1920	AAAGGCTTCTAATTATTCTGAATTCTTGGGTATCTCTGGTGCAATGTAAT	CCACAAAGGGCCGAGTTAAG	AGAGAATCCTCTCGCCATCC	CCACAAAGGGCCGAGTTAAGAAAGGCTTCTAATTATTCTGAATTCTTGGGTATCTCTGGTGCAATGTAATAGAGAATCCTCTCGCCATCC
1921	TACATTGTTTAGTTTATTAAATCAGATGTAGTTTTATGTAGCTAATGTGT	CCACAAAGGGCCGAGTTAAG	AGAGAATCCTCTCGCCATCC	CCACAAAGGGCCGAGTTAAGTACATTGTTTAGTTTATTAAATCAGATGTAGTTTTATGTAGCTAATGTGTAGAGAATCCTCTCGCCATCC
1922	GAGCAACTCATAAACAGTATACTTATTTGTAAAATGTTATGTTCTTCTTT	CCACAAAGGGCCGAGTTAAG	AGAGAATCCTCTCGCCATCC	CCACAAAGGGCCGAGTTAAGGAGCAACTCATAAACAGTATACTTATTTGTAAAATGTTATGTTCTTCTTTAGAGAATCCTCTCGCCATCC
1923	TCCTGGAACTTATTTAGGATGCAAAATGGAGATATCTACTTCGTGAGTTT	CCACAAAGGGCCGAGTTAAG	AGAGAATCCTCTCGCCATCC	CCACAAAGGGCCGAGTTAAGTCCTGGAACTTATTTAGGATGCAAAATGGAGATATCTACTTCGTGAGTTTAGAGAATCCTCTCGCCATCC
1924	ATTCTATGTTAATTCCTATCTCCTCTAGAATTTGTTGAAAGAGTTTTGTT	CCACAAAGGGCCGAGTTAAG	AGAGAATCCTCTCGCCATCC	CCACAAAGGGCCGAGTTAAGATTCTATGTTAATTCCTATCTCCTCTAGAATTTGTTGAAAGAGTTTTGTTAGAGAATCCTCTCGCCATCC
1925	GCATTTGCCAGTCCCACATAGCCCTCCAGGAAAGAGAAGCCAACTGTTTA	CCACAAAGGGCCGAGTTAAG	AGAGAATCCTCTCGCCATCC	CCACAAAGGGCCGAGTTAAGGCATTTGCCAGTCCCACATAGCCCTCCAGGAAAGAGAAGCCAACTGTTTAAGAGAATCCTCTCGCCATCC
1926	AACAAATGATGCAACTTAACTTTTAATATGAACGTAGTCTGATTTTACCA	CCACAAAGGGCCGAGTTAAG	AGAGAATCCTCTCGCCATCC	CCACAAAGGGCCGAGTTAAGAACAAATGATGCAACTTAACTTTTAATATGAACGTAGTCTGATTTTACCAAGAGAATCCTCTCGCCATCC
1927	AGACTATCAAGCTTCAAAACTCGTCCCTTCCCTTTCTCAACCACCAAATC	CCACAAAGGGCCGAGTTAAG	AGAGAATCCTCTCGCCATCC	CCACAAAGGGCCGAGTTAAGAGACTATCAAGCTTCAAAACTCGTCCCTTCCCTTTCTCAACCACCAAATCAGAGAATCCTCTCGCCATCC
1928	GGCAGTCAAATGGTTTCTCGATGAATGAGCAGATTGATGCATTATACAGA	CCACAAAGGGCCGAGTTAAG	AGAGAATCCTCTCGCCATCC	CCACAAAGGGCCGAGTTAAGGGCAGTCAAATGGTTTCTCGATGAATGAGCAGATTGATGCATTATACAGAAGAGAATCCTCTCGCCATCC
1929	ACATTTTCATGGCTTAAAAGGATCAAAACCAAAGGGATGTGATCTTTTCC	CCACAAAGGGCCGAGTTAAG	AGAGAATCCTCTCGCCATCC	CCACAAAGGGCCGAGTTAAGACATTTTCATGGCTTAAAAGGATCAAAACCAAAGGGATGTGATCTTTTCCAGAGAATCCTCTCGCCATCC
1930	TTTATGAATAACTTCCCTACTTTATATTTATATGGTTTCATCAAGAAGCA	CCACAAAGGGCCGAGTTAAG	AGAGAATCCTCTCGCCATCC	CCACAAAGGGCCGAGTTAAGTTTATGAATAACTTCCCTACTTTATATTTATATGGTTTCATCAAGAAGCAAGAGAATCCTCTCGCCATCC
1931	TTTTGGTCTGCTGATCATCACTTAATTAACCACTAAAATCATTAATGGAA	CCACAAAGGGCCGAGTTAAG	AGAGAATCCTCTCGCCATCC	CCACAAAGGGCCGAGTTAAGTTTTGGTCTGCTGATCATCACTTAATTAACCACTAAAATCATTAATGGAAAGAGAATCCTCTCGCCATCC
1932	TGGTTAAGCTTTATTTTATGATCCAAAGGGTAATTTAACTTCAATTGCAA	CCACAAAGGGCCGAGTTAAG	AGAGAATCCTCTCGCCATCC	CCACAAAGGGCCGAGTTAAGTGGTTAAGCTTTATTTTATGATCCAAAGGGTAATTTAACTTCAATTGCAAAGAGAATCCTCTCGCCATCC
1933	CCACTAATGTCCAAAAGCATAAATACTCCTATTACTATACATATTGATAG	CCACAAAGGGCCGAGTTAAG	AGAGAATCCTCTCGCCATCC	CCACAAAGGGCCGAGTTAAGCCACTAATGTCCAAAAGCATAAATACTCCTATTACTATACATATTGATAGAGAGAATCCTCTCGCCATCC
1934	TTTATTATTAGCTGGTTATTATTGTAGCTCGGAAATAGTTAAAGAAATTT	CCACAAAGGGCCGAGTTAAG	AGAGAATCCTCTCGCCATCC	CCACAAAGGGCCGAGTTAAGTTTATTATTAGCTGGTTATTATTGTAGCTCGGAAATAGTTAAAGAAATTTAGAGAATCCTCTCGCCATCC
1935	TTATATTATGAACCAGTGGTAGCTTGTGGAATGAATCGAACGCAAAGAGC	CCACAAAGGGCCGAGTTAAG	AGAGAATCCTCTCGCCATCC	CCACAAAGGGCCGAGTTAAGTTATATTATGAACCAGTGGTAGCTTGTGGAATGAATCGAACGCAAAGAGCAGAGAATCCTCTCGCCATCC
1936	TTTAGGTCTTGAATGAGAATTAGATATTAAAGTATTGTGCATGGCAGATG	CCACAAAGGGCCGAGTTAAG	AGAGAATCCTCTCGCCATCC	CCACAAAGGGCCGAGTTAAGTTTAGGTCTTGAATGAGAATTAGATATTAAAGTATTGTGCATGGCAGATGAGAGAATCCTCTCGCCATCC
1937	GATACAAGCTTTTCATTATTTGTACACATTATATTTGAGTCCAGAAAATG	CCACAAAGGGCCGAGTTAAG	AGAGAATCCTCTCGCCATCC	CCACAAAGGGCCGAGTTAAGGATACAAGCTTTTCATTATTTGTACACATTATATTTGAGTCCAGAAAATGAGAGAATCCTCTCGCCATCC
1938	TTGTTGCCCATTAAATTCAAATTGTTAATTGTTAATTGTTAAATGGTCCC	CCACAAAGGGCCGAGTTAAG	AGAGAATCCTCTCGCCATCC	CCACAAAGGGCCGAGTTAAGTTGTTGCCCATTAAATTCAAATTGTTAATTGTTAATTGTTAAATGGTCCCAGAGAATCCTCTCGCCATCC
1939	TGTACAAGAAAACAATCCCAGATTTCAATAGTAGTACTGATATATATATA	CCACAAAGGGCCGAGTTAAG	AGAGAATCCTCTCGCCATCC	CCACAAAGGGCCGAGTTAAGTGTACAAGAAAACAATCCCAGATTTCAATAGTAGTACTGATATATATATAAGAGAATCCTCTCGCCATCC
1940	GTTGAATAGCGGGATTCTATCATTTGCATGGTGTATCGTATATATATATA	CCACAAAGGGCCGAGTTAAG	AGAGAATCCTCTCGCCATCC	CCACAAAGGGCCGAGTTAAGGTTGAATAGCGGGATTCTATCATTTGCATGGTGTATCGTATATATATATAAGAGAATCCTCTCGCCATCC
1941	ATTGAGAACATTCGTCTGATCATCATTAATGGGTAGATCCAAGCAGTCAG	CCACAAAGGGCCGAGTTAAG	AGAGAATCCTCTCGCCATCC	CCACAAAGGGCCGAGTTAAGATTGAGAACATTCGTCTGATCATCATTAATGGGTAGATCCAAGCAGTCAGAGAGAATCCTCTCGCCATCC
1942	AAGTAAATCATCATCTTCAGAAACAATACAATTGATAACATTCAAATTTG	CCACAAAGGGCCGAGTTAAG	AGAGAATCCTCTCGCCATCC	CCACAAAGGGCCGAGTTAAGAAGTAAATCATCATCTTCAGAAACAATACAATTGATAACATTCAAATTTGAGAGAATCCTCTCGCCATCC
1943	TGAACATATGGCAGTAAGGTGGATGATAGTGGCATGTGGAAATTGAATTT	CCACAAAGGGCCGAGTTAAG	AGAGAATCCTCTCGCCATCC	CCACAAAGGGCCGAGTTAAGTGAACATATGGCAGTAAGGTGGATGATAGTGGCATGTGGAAATTGAATTTAGAGAATCCTCTCGCCATCC
1944	AGACAAGGAGACCCATTATCACCGGCTTTGTTCACAATCTTCTCAGATGT	CCACAAAGGGCCGAGTTAAG	AGAGAATCCTCTCGCCATCC	CCACAAAGGGCCGAGTTAAGAGACAAGGAGACCCATTATCACCGGCTTTGTTCACAATCTTCTCAGATGTAGAGAATCCTCTCGCCATCC
1945	TTGTTCAACACCTCCCCACATTGTTTGATGCCACCCCAAATCCATGAGGA	CCACAAAGGGCCGAGTTAAG	AGAGAATCCTCTCGCCATCC	CCACAAAGGGCCGAGTTAAGTTGTTCAACACCTCCCCACATTGTTTGATGCCACCCCAAATCCATGAGGAAGAGAATCCTCTCGCCATCC
1946	GGTAAATCAGTCACTGGAGTTGGTTTGAGAAATCACAATGGCCTCATTCT	CCACAAAGGGCCGAGTTAAG	AGAGAATCCTCTCGCCATCC	CCACAAAGGGCCGAGTTAAGGGTAAATCAGTCACTGGAGTTGGTTTGAGAAATCACAATGGCCTCATTCTAGAGAATCCTCTCGCCATCC
1947	CCAATGCAACAACTCCTACACAAACCAGATGAATAAAATGGGTCATTAAA	CCACAAAGGGCCGAGTTAAG	AGAGAATCCTCTCGCCATCC	CCACAAAGGGCCGAGTTAAGCCAATGCAACAACTCCTACACAAACCAGATGAATAAAATGGGTCATTAAAAGAGAATCCTCTCGCCATCC
1948	CACCAATGTGTACAATCGATTCCGGTTCTTGATACACCATAAAATGAAGG	CCACAAAGGGCCGAGTTAAG	AGAGAATCCTCTCGCCATCC	CCACAAAGGGCCGAGTTAAGCACCAATGTGTACAATCGATTCCGGTTCTTGATACACCATAAAATGAAGGAGAGAATCCTCTCGCCATCC
1949	TATGCCCTTTTCAAATAAATTATTTACTATTAGGTCCAAGTGCCATTATC	CCACAAAGGGCCGAGTTAAG	AGAGAATCCTCTCGCCATCC	CCACAAAGGGCCGAGTTAAGTATGCCCTTTTCAAATAAATTATTTACTATTAGGTCCAAGTGCCATTATCAGAGAATCCTCTCGCCATCC
1950	GATCTTGAACCATCAGATATTGGCGTAATACTGAAGATAGACAGAATTGC	CCACAAAGGGCCGAGTTAAG	AGAGAATCCTCTCGCCATCC	CCACAAAGGGCCGAGTTAAGGATCTTGAACCATCAGATATTGGCGTAATACTGAAGATAGACAGAATTGCAGAGAATCCTCTCGCCATCC
1951	ACATTATTTGAAATTTGTGTCACAACCATAATGATTACATTTTCGCTTAA	CCACAAAGGGCCGAGTTAAG	AGAGAATCCTCTCGCCATCC	CCACAAAGGGCCGAGTTAAGACATTATTTGAAATTTGTGTCACAACCATAATGATTACATTTTCGCTTAAAGAGAATCCTCTCGCCATCC
1952	TAACCTTAAATTTCTCCAGTACAAATCCAATCGAATGCAAAATAAAGTAT	CCACAAAGGGCCGAGTTAAG	AGAGAATCCTCTCGCCATCC	CCACAAAGGGCCGAGTTAAGTAACCTTAAATTTCTCCAGTACAAATCCAATCGAATGCAAAATAAAGTATAGAGAATCCTCTCGCCATCC
1953	TAAGAAATAAAAGTTCAAAATCTAAGGGAATCATTTGAGGATGCATTGTC	CCACAAAGGGCCGAGTTAAG	AGAGAATCCTCTCGCCATCC	CCACAAAGGGCCGAGTTAAGTAAGAAATAAAAGTTCAAAATCTAAGGGAATCATTTGAGGATGCATTGTCAGAGAATCCTCTCGCCATCC
1954	CTTCTTTAGTGGAATTAAATTGCTGTCATCTGTCTTTGTTCAGATTTTAC	CCACAAAGGGCCGAGTTAAG	AGAGAATCCTCTCGCCATCC	CCACAAAGGGCCGAGTTAAGCTTCTTTAGTGGAATTAAATTGCTGTCATCTGTCTTTGTTCAGATTTTACAGAGAATCCTCTCGCCATCC
1955	AACTCCTCTGTAGTACCACCATTGAAACGTGTTAAAGATGAGAAAATCAT	CCACAAAGGGCCGAGTTAAG	AGAGAATCCTCTCGCCATCC	CCACAAAGGGCCGAGTTAAGAACTCCTCTGTAGTACCACCATTGAAACGTGTTAAAGATGAGAAAATCATAGAGAATCCTCTCGCCATCC
1956	TGCTGGCTCTTCATTAAGTAAATCATGTATCAATATTCTTCAAACGTGAA	CCACAAAGGGCCGAGTTAAG	AGAGAATCCTCTCGCCATCC	CCACAAAGGGCCGAGTTAAGTGCTGGCTCTTCATTAAGTAAATCATGTATCAATATTCTTCAAACGTGAAAGAGAATCCTCTCGCCATCC
1957	CTGGTGTGTTGCTGGAGTGCCTGATATTTGGAATGAGATTCTTTATAATC	CCACAAAGGGCCGAGTTAAG	AGAGAATCCTCTCGCCATCC	CCACAAAGGGCCGAGTTAAGCTGGTGTGTTGCTGGAGTGCCTGATATTTGGAATGAGATTCTTTATAATCAGAGAATCCTCTCGCCATCC
1958	TGTCTCCTTACTTGATACATAAAAGATTACGATTAACTTGTTATATAACT	CCACAAAGGGCCGAGTTAAG	AGAGAATCCTCTCGCCATCC	CCACAAAGGGCCGAGTTAAGTGTCTCCTTACTTGATACATAAAAGATTACGATTAACTTGTTATATAACTAGAGAATCCTCTCGCCATCC
1959	AGAGTCCAGATTGAAGATAGTACACAGAGACATCAAAGCTACAAATGTGC	CCACAAAGGGCCGAGTTAAG	AGAGAATCCTCTCGCCATCC	CCACAAAGGGCCGAGTTAAGAGAGTCCAGATTGAAGATAGTACACAGAGACATCAAAGCTACAAATGTGCAGAGAATCCTCTCGCCATCC
1960	CATTTGATTGATTTCTTTTAATATCAAGATTCGAAAACAAATGTAGTTGC	CCACAAAGGGCCGAGTTAAG	AGAGAATCCTCTCGCCATCC	CCACAAAGGGCCGAGTTAAGCATTTGATTGATTTCTTTTAATATCAAGATTCGAAAACAAATGTAGTTGCAGAGAATCCTCTCGCCATCC
1961	AAGCTGAAGAATACTTATCTTATGATGTCCAATTCCTTTTATGTAGTCCC	CCACAAAGGGCCGAGTTAAG	AGAGAATCCTCTCGCCATCC	CCACAAAGGGCCGAGTTAAGAAGCTGAAGAATACTTATCTTATGATGTCCAATTCCTTTTATGTAGTCCCAGAGAATCCTCTCGCCATCC
1962	TTGGTTCTGCAAGAAGATTAGATATAAAGGAAGTGGAAAAGTAAATGCTC	CCACAAAGGGCCGAGTTAAG	AGAGAATCCTCTCGCCATCC	CCACAAAGGGCCGAGTTAAGTTGGTTCTGCAAGAAGATTAGATATAAAGGAAGTGGAAAAGTAAATGCTCAGAGAATCCTCTCGCCATCC
1963	GGAAGAACTTTGAAGACCCTCCTGACTCTCTATCATCCTCATAACTTGTA	CCACAAAGGGCCGAGTTAAG	AGAGAATCCTCTCGCCATCC	CCACAAAGGGCCGAGTTAAGGGAAGAACTTTGAAGACCCTCCTGACTCTCTATCATCCTCATAACTTGTAAGAGAATCCTCTCGCCATCC
1964	ATCCCATGATGAATTGGTGGAGTAGAAATTTTGCTTCTCACAGAGCCTTG	CCACAAAGGGCCGAGTTAAG	AGAGAATCCTCTCGCCATCC	CCACAAAGGGCCGAGTTAAGATCCCATGATGAATTGGTGGAGTAGAAATTTTGCTTCTCACAGAGCCTTGAGAGAATCCTCTCGCCATCC
1965	AAAATTTACTGATTGACTAACGTTGATTTTGCTAGTTATTTATCTGGAAA	CCACAAAGGGCCGAGTTAAG	AGAGAATCCTCTCGCCATCC	CCACAAAGGGCCGAGTTAAGAAAATTTACTGATTGACTAACGTTGATTTTGCTAGTTATTTATCTGGAAAAGAGAATCCTCTCGCCATCC
1966	AAAGGTTTATGGAATCAAGTCAAGGGGTCTTACATCTTCTCTATGCTAGT	CCACAAAGGGCCGAGTTAAG	AGAGAATCCTCTCGCCATCC	CCACAAAGGGCCGAGTTAAGAAAGGTTTATGGAATCAAGTCAAGGGGTCTTACATCTTCTCTATGCTAGTAGAGAATCCTCTCGCCATCC
1967	GCTCAGATCATATAGAAATCCCGTCAACTACTTCAAAATGTTAGATTTGG	CCACAAAGGGCCGAGTTAAG	AGAGAATCCTCTCGCCATCC	CCACAAAGGGCCGAGTTAAGGCTCAGATCATATAGAAATCCCGTCAACTACTTCAAAATGTTAGATTTGGAGAGAATCCTCTCGCCATCC
1968	TCAAATAATGGTTTTAAGAAATGTCCACAAATCAGCCAGAAAATTTACTA	CCACAAAGGGCCGAGTTAAG	AGAGAATCCTCTCGCCATCC	CCACAAAGGGCCGAGTTAAGTCAAATAATGGTTTTAAGAAATGTCCACAAATCAGCCAGAAAATTTACTAAGAGAATCCTCTCGCCATCC
1969	TTCCACTTACCGACAGCTTCAAATTAATAACTAAGATGACAATAGGGAAT	CCACAAAGGGCCGAGTTAAG	AGAGAATCCTCTCGCCATCC	CCACAAAGGGCCGAGTTAAGTTCCACTTACCGACAGCTTCAAATTAATAACTAAGATGACAATAGGGAATAGAGAATCCTCTCGCCATCC
1970	GTCTTCTTTCACCTCTCTCAACAACATAATCTCAACCCTAGCATTGGATA	CCACAAAGGGCCGAGTTAAG	AGAGAATCCTCTCGCCATCC	CCACAAAGGGCCGAGTTAAGGTCTTCTTTCACCTCTCTCAACAACATAATCTCAACCCTAGCATTGGATAAGAGAATCCTCTCGCCATCC
1971	CCCCATCTCATACTCTGTTCCTCACATGAATTTCTTCTATTTTCAATCAC	CCACAAAGGGCCGAGTTAAG	AGAGAATCCTCTCGCCATCC	CCACAAAGGGCCGAGTTAAGCCCCATCTCATACTCTGTTCCTCACATGAATTTCTTCTATTTTCAATCACAGAGAATCCTCTCGCCATCC
1972	CTTTGGTGAATGTAGTGCAAATTTAATTGTGGATTCTTTTAGGGCTTGCT	CCACAAAGGGCCGAGTTAAG	AGAGAATCCTCTCGCCATCC	CCACAAAGGGCCGAGTTAAGCTTTGGTGAATGTAGTGCAAATTTAATTGTGGATTCTTTTAGGGCTTGCTAGAGAATCCTCTCGCCATCC
1973	CCTTGAGGTGTCTAATCATTCTTATATTGGGAAATGTTGGGCGTTGGAGT	CCACAAAGGGCCGAGTTAAG	AGAGAATCCTCTCGCCATCC	CCACAAAGGGCCGAGTTAAGCCTTGAGGTGTCTAATCATTCTTATATTGGGAAATGTTGGGCGTTGGAGTAGAGAATCCTCTCGCCATCC
1974	CTATAAATACAATCTAGAATTAGACTATAAATATAATCTGCATTAATTTT	CCACAAAGGGCCGAGTTAAG	AGAGAATCCTCTCGCCATCC	CCACAAAGGGCCGAGTTAAGCTATAAATACAATCTAGAATTAGACTATAAATATAATCTGCATTAATTTTAGAGAATCCTCTCGCCATCC
1975	ATTATTAGTTTGCATATATGACAGTTAAACTTATTATTAAATAGTCAAAG	CCACAAAGGGCCGAGTTAAG	AGAGAATCCTCTCGCCATCC	CCACAAAGGGCCGAGTTAAGATTATTAGTTTGCATATATGACAGTTAAACTTATTATTAAATAGTCAAAGAGAGAATCCTCTCGCCATCC
1976	AATTATATATTCTAGTATTTAGAATCTCATTTACTCTAAAATTAGTTAAT	CCACAAAGGGCCGAGTTAAG	AGAGAATCCTCTCGCCATCC	CCACAAAGGGCCGAGTTAAGAATTATATATTCTAGTATTTAGAATCTCATTTACTCTAAAATTAGTTAATAGAGAATCCTCTCGCCATCC
1977	ATAAAATTAATTAATAAAGATAGAGAATTAAAATCACGAGCTGACAAGAA	CCACAAAGGGCCGAGTTAAG	AGAGAATCCTCTCGCCATCC	CCACAAAGGGCCGAGTTAAGATAAAATTAATTAATAAAGATAGAGAATTAAAATCACGAGCTGACAAGAAAGAGAATCCTCTCGCCATCC
1978	TATGCACTATATAAGTTTATTTTCATAATACAGAAACGCAAGAATTATTT	CCACAAAGGGCCGAGTTAAG	AGAGAATCCTCTCGCCATCC	CCACAAAGGGCCGAGTTAAGTATGCACTATATAAGTTTATTTTCATAATACAGAAACGCAAGAATTATTTAGAGAATCCTCTCGCCATCC
1979	ATGGTCTTGCATTTTAGATTTGAATGTCCTTATTCGTATTTTGGGATATC	CCACAAAGGGCCGAGTTAAG	AGAGAATCCTCTCGCCATCC	CCACAAAGGGCCGAGTTAAGATGGTCTTGCATTTTAGATTTGAATGTCCTTATTCGTATTTTGGGATATCAGAGAATCCTCTCGCCATCC
1980	TTCCTTACAAATGTTAAATTCAGAAGAAAATGCCTTTACAATATCTTATT	CCACAAAGGGCCGAGTTAAG	AGAGAATCCTCTCGCCATCC	CCACAAAGGGCCGAGTTAAGTTCCTTACAAATGTTAAATTCAGAAGAAAATGCCTTTACAATATCTTATTAGAGAATCCTCTCGCCATCC
1981	TATATATTCTATCTAGTTCACATGAAAGATACATACAGTCTATCCATTTT	CCACAAAGGGCCGAGTTAAG	AGAGAATCCTCTCGCCATCC	CCACAAAGGGCCGAGTTAAGTATATATTCTATCTAGTTCACATGAAAGATACATACAGTCTATCCATTTTAGAGAATCCTCTCGCCATCC
1982	ATTATTAATATTATTCTAAGTATTAACCCTTCCAGTGACATTTCAATTGC	CCACAAAGGGCCGAGTTAAG	AGAGAATCCTCTCGCCATCC	CCACAAAGGGCCGAGTTAAGATTATTAATATTATTCTAAGTATTAACCCTTCCAGTGACATTTCAATTGCAGAGAATCCTCTCGCCATCC
1983	GAGCAATTTCTCAAAATTCTGCAACAAAAGGGATCAAATAAGACACTTGA	CCACAAAGGGCCGAGTTAAG	AGAGAATCCTCTCGCCATCC	CCACAAAGGGCCGAGTTAAGGAGCAATTTCTCAAAATTCTGCAACAAAAGGGATCAAATAAGACACTTGAAGAGAATCCTCTCGCCATCC
1984	GTCAATATCCAATAATTATTCTTTAGCCAACCATAAGGAAATGTCTGTGA	CCACAAAGGGCCGAGTTAAG	AGAGAATCCTCTCGCCATCC	CCACAAAGGGCCGAGTTAAGGTCAATATCCAATAATTATTCTTTAGCCAACCATAAGGAAATGTCTGTGAAGAGAATCCTCTCGCCATCC
1985	TTTCATTTTATCCCAAAGAAGGTCTGCTTTCATTATAATAGTTTCTAATA	CCACAAAGGGCCGAGTTAAG	AGAGAATCCTCTCGCCATCC	CCACAAAGGGCCGAGTTAAGTTTCATTTTATCCCAAAGAAGGTCTGCTTTCATTATAATAGTTTCTAATAAGAGAATCCTCTCGCCATCC
1986	TACCAATTCGTCAAAACCACTTAAATTGCATACAAAATTCTTCCAAATTT	CCACAAAGGGCCGAGTTAAG	AGAGAATCCTCTCGCCATCC	CCACAAAGGGCCGAGTTAAGTACCAATTCGTCAAAACCACTTAAATTGCATACAAAATTCTTCCAAATTTAGAGAATCCTCTCGCCATCC
1987	GGTGAGAAAATAAATGTCCATAAAATGCCACAAGTTATAAATATGAAGTA	CCACAAAGGGCCGAGTTAAG	AGAGAATCCTCTCGCCATCC	CCACAAAGGGCCGAGTTAAGGGTGAGAAAATAAATGTCCATAAAATGCCACAAGTTATAAATATGAAGTAAGAGAATCCTCTCGCCATCC
1988	TTGTATTGAAGGAAACCAGTTACTTCTAATATATGAATACATGGAGAACA	CCACAAAGGGCCGAGTTAAG	AGAGAATCCTCTCGCCATCC	CCACAAAGGGCCGAGTTAAGTTGTATTGAAGGAAACCAGTTACTTCTAATATATGAATACATGGAGAACAAGAGAATCCTCTCGCCATCC
1989	GTCTTGCCAAGCTTGATGAAGAAGAGAATACACACATTAGTACACGAATT	CCACAAAGGGCCGAGTTAAG	AGAGAATCCTCTCGCCATCC	CCACAAAGGGCCGAGTTAAGGTCTTGCCAAGCTTGATGAAGAAGAGAATACACACATTAGTACACGAATTAGAGAATCCTCTCGCCATCC
1990	GTTATCATTGATGTTAAATAGGTTCATTTATAGGTTTTAAATTTGGGTTA	CCACAAAGGGCCGAGTTAAG	AGAGAATCCTCTCGCCATCC	CCACAAAGGGCCGAGTTAAGGTTATCATTGATGTTAAATAGGTTCATTTATAGGTTTTAAATTTGGGTTAAGAGAATCCTCTCGCCATCC
1991	CATGCTCATAATACTAGTGCTATTTAGATTGTGACTAATCCTATCTTTTA	CCACAAAGGGCCGAGTTAAG	AGAGAATCCTCTCGCCATCC	CCACAAAGGGCCGAGTTAAGCATGCTCATAATACTAGTGCTATTTAGATTGTGACTAATCCTATCTTTTAAGAGAATCCTCTCGCCATCC
1992	GACTGTTTTGATAAAGAGATATTATTTGTTGTAGCTGTAATCAAGGGATA	CCACAAAGGGCCGAGTTAAG	AGAGAATCCTCTCGCCATCC	CCACAAAGGGCCGAGTTAAGGACTGTTTTGATAAAGAGATATTATTTGTTGTAGCTGTAATCAAGGGATAAGAGAATCCTCTCGCCATCC
1993	TTTTCATTGTAATTATCTTTCAGAATTATCACATCTTAAATTGCACTTGA	CCACAAAGGGCCGAGTTAAG	AGAGAATCCTCTCGCCATCC	CCACAAAGGGCCGAGTTAAGTTTTCATTGTAATTATCTTTCAGAATTATCACATCTTAAATTGCACTTGAAGAGAATCCTCTCGCCATCC
1994	AAGATAAATGCAAATACTTGGTTAATATTGGTCGCCTGTCACTTAGATAC	CCACAAAGGGCCGAGTTAAG	AGAGAATCCTCTCGCCATCC	CCACAAAGGGCCGAGTTAAGAAGATAAATGCAAATACTTGGTTAATATTGGTCGCCTGTCACTTAGATACAGAGAATCCTCTCGCCATCC
1995	GCTACCTAACAGATAAAGCAGATGTATACAGTTTTGGAGTAGTTGCATTG	CCACAAAGGGCCGAGTTAAG	AGAGAATCCTCTCGCCATCC	CCACAAAGGGCCGAGTTAAGGCTACCTAACAGATAAAGCAGATGTATACAGTTTTGGAGTAGTTGCATTGAGAGAATCCTCTCGCCATCC
1996	AAGTTACAGTACTAATGTTGTTGCATAGTTGGGTGGTGTGGAAATAAAGA	CCACAAAGGGCCGAGTTAAG	AGAGAATCCTCTCGCCATCC	CCACAAAGGGCCGAGTTAAGAAGTTACAGTACTAATGTTGTTGCATAGTTGGGTGGTGTGGAAATAAAGAAGAGAATCCTCTCGCCATCC
1997	AAGATGAGTGAAATGAGATACCTGATCAGAAGTGCAAGTAGAAAATAGGA	CCACAAAGGGCCGAGTTAAG	AGAGAATCCTCTCGCCATCC	CCACAAAGGGCCGAGTTAAGAAGATGAGTGAAATGAGATACCTGATCAGAAGTGCAAGTAGAAAATAGGAAGAGAATCCTCTCGCCATCC
1998	TGCATACCTACCACAAAGTTCCCGATCATGTGTCTTTAGAATTTCAGATG	CCACAAAGGGCCGAGTTAAG	AGAGAATCCTCTCGCCATCC	CCACAAAGGGCCGAGTTAAGTGCATACCTACCACAAAGTTCCCGATCATGTGTCTTTAGAATTTCAGATGAGAGAATCCTCTCGCCATCC
[truncated: 13,169 more rows]

## Sheet: Supplementary table 1 chr2
Supplementary Table 1. Oligo-FISH primer information.
No.	Target Sequence	5' Adaptor Sequence	3' Adaptor Sequence	Oligo Sequence
1	TTCTTGTTTTATGCTACAACTTAAAATACTCCACATTTAACATCATGAAT	TGTGACAGTAGCTCCGAACC	AACCTGGGGAGTCGTAGTTC	TGTGACAGTAGCTCCGAACCTTCTTGTTTTATGCTACAACTTAAAATACTCCACATTTAACATCATGAATAACCTGGGGAGTCGTAGTTC
2	CTAGGTACTGCATCAATAACTTCACTGGGCTATAAGTATTTTCTGTTCTG	TGTGACAGTAGCTCCGAACC	AACCTGGGGAGTCGTAGTTC	TGTGACAGTAGCTCCGAACCCTAGGTACTGCATCAATAACTTCACTGGGCTATAAGTATTTTCTGTTCTGAACCTGGGGAGTCGTAGTTC
3	GCATACCATGGTATTAATTACAAAAGGCTATAAAGATAGTGTAACAGAAG	TGTGACAGTAGCTCCGAACC	AACCTGGGGAGTCGTAGTTC	TGTGACAGTAGCTCCGAACCGCATACCATGGTATTAATTACAAAAGGCTATAAAGATAGTGTAACAGAAGAACCTGGGGAGTCGTAGTTC
4	AAAGGAAACCTCGTTCACCAGAAGTTAAAATAATTCCCAGAGTTTCAAAG	TGTGACAGTAGCTCCGAACC	AACCTGGGGAGTCGTAGTTC	TGTGACAGTAGCTCCGAACCAAAGGAAACCTCGTTCACCAGAAGTTAAAATAATTCCCAGAGTTTCAAAGAACCTGGGGAGTCGTAGTTC
5	AACCACTTCTTCATTCGGTTTAAATAATTCTCAATGCTTCTGCCATTATT	TGTGACAGTAGCTCCGAACC	AACCTGGGGAGTCGTAGTTC	TGTGACAGTAGCTCCGAACCAACCACTTCTTCATTCGGTTTAAATAATTCTCAATGCTTCTGCCATTATTAACCTGGGGAGTCGTAGTTC
6	AGCTGGTAACTTTGCTATATTATGGTGCTTATTTCAGTTAGTGGGCCTGA	TGTGACAGTAGCTCCGAACC	AACCTGGGGAGTCGTAGTTC	TGTGACAGTAGCTCCGAACCAGCTGGTAACTTTGCTATATTATGGTGCTTATTTCAGTTAGTGGGCCTGAAACCTGGGGAGTCGTAGTTC
7	AGTAAGCTATATACTGTAACACTTTCCTTTTCTCACAGCACCATTCATTT	TGTGACAGTAGCTCCGAACC	AACCTGGGGAGTCGTAGTTC	TGTGACAGTAGCTCCGAACCAGTAAGCTATATACTGTAACACTTTCCTTTTCTCACAGCACCATTCATTTAACCTGGGGAGTCGTAGTTC
8	ATAATATATTTGTTTAATGTTAAAATAAGAGTATTTATCAAAATAGTTTA	TGTGACAGTAGCTCCGAACC	AACCTGGGGAGTCGTAGTTC	TGTGACAGTAGCTCCGAACCATAATATATTTGTTTAATGTTAAAATAAGAGTATTTATCAAAATAGTTTAAACCTGGGGAGTCGTAGTTC
9	ATATTATTGGAGAGAGAGAAGGTCCAAAACAGAAAATGAAAGTCCAGATA	TGTGACAGTAGCTCCGAACC	AACCTGGGGAGTCGTAGTTC	TGTGACAGTAGCTCCGAACCATATTATTGGAGAGAGAGAAGGTCCAAAACAGAAAATGAAAGTCCAGATAAACCTGGGGAGTCGTAGTTC
10	ATTCTTCAGTGGCTCCAGCAACAAACGGGTTATATTTCTACAAAGATCAG	TGTGACAGTAGCTCCGAACC	AACCTGGGGAGTCGTAGTTC	TGTGACAGTAGCTCCGAACCATTCTTCAGTGGCTCCAGCAACAAACGGGTTATATTTCTACAAAGATCAGAACCTGGGGAGTCGTAGTTC
11	AAGAATTTAGATGTCCTTAACGGCTGTATTGTTACTGTCAGACTATCGAG	TGTGACAGTAGCTCCGAACC	AACCTGGGGAGTCGTAGTTC	TGTGACAGTAGCTCCGAACCAAGAATTTAGATGTCCTTAACGGCTGTATTGTTACTGTCAGACTATCGAGAACCTGGGGAGTCGTAGTTC
12	AACATTTGAAATTTAGTATAATAATTTATGTTGTCTCAGTTTTGCGGTTT	TGTGACAGTAGCTCCGAACC	AACCTGGGGAGTCGTAGTTC	TGTGACAGTAGCTCCGAACCAACATTTGAAATTTAGTATAATAATTTATGTTGTCTCAGTTTTGCGGTTTAACCTGGGGAGTCGTAGTTC
13	CTAATTGGGTTAAGAGAATTAATGGGCAAAATGTCTTTAGTGGAATTGAT	TGTGACAGTAGCTCCGAACC	AACCTGGGGAGTCGTAGTTC	TGTGACAGTAGCTCCGAACCCTAATTGGGTTAAGAGAATTAATGGGCAAAATGTCTTTAGTGGAATTGATAACCTGGGGAGTCGTAGTTC
14	ATTCTTGAAAGAGAGAAGGAGGGAGATGGATACGTTGAACTTGAACAAGG	TGTGACAGTAGCTCCGAACC	AACCTGGGGAGTCGTAGTTC	TGTGACAGTAGCTCCGAACCATTCTTGAAAGAGAGAAGGAGGGAGATGGATACGTTGAACTTGAACAAGGAACCTGGGGAGTCGTAGTTC
15	CAGAGATACCTTCCTTCCAAGAAATTCATCAAGCCGATCAACAACAGAAG	TGTGACAGTAGCTCCGAACC	AACCTGGGGAGTCGTAGTTC	TGTGACAGTAGCTCCGAACCCAGAGATACCTTCCTTCCAAGAAATTCATCAAGCCGATCAACAACAGAAGAACCTGGGGAGTCGTAGTTC
16	TAACGTTAATTATTTCCTTTCGATACAACATAAATAAAGAAAAGACATAT	TGTGACAGTAGCTCCGAACC	AACCTGGGGAGTCGTAGTTC	TGTGACAGTAGCTCCGAACCTAACGTTAATTATTTCCTTTCGATACAACATAAATAAAGAAAAGACATATAACCTGGGGAGTCGTAGTTC
17	ATTGGGATACCTGATTGGAAAAGAAAATACGGTCTGATTTGTACTTTTCA	TGTGACAGTAGCTCCGAACC	AACCTGGGGAGTCGTAGTTC	TGTGACAGTAGCTCCGAACCATTGGGATACCTGATTGGAAAAGAAAATACGGTCTGATTTGTACTTTTCAAACCTGGGGAGTCGTAGTTC
18	AGAGCTGGTGATCTTAAGAGGAGAAGGCACTGGAAAGCTTGAGGAATGGG	TGTGACAGTAGCTCCGAACC	AACCTGGGGAGTCGTAGTTC	TGTGACAGTAGCTCCGAACCAGAGCTGGTGATCTTAAGAGGAGAAGGCACTGGAAAGCTTGAGGAATGGGAACCTGGGGAGTCGTAGTTC
19	ACCCCTAACGAGTTTGATACCTTTGAGGATGTACTGAAAATTTACAAAAG	TGTGACAGTAGCTCCGAACC	AACCTGGGGAGTCGTAGTTC	TGTGACAGTAGCTCCGAACCACCCCTAACGAGTTTGATACCTTTGAGGATGTACTGAAAATTTACAAAAGAACCTGGGGAGTCGTAGTTC
20	GTTTTGATTGCTGACCATATCTTCAGACCATCAACGGCAAAAGGATAGTC	TGTGACAGTAGCTCCGAACC	AACCTGGGGAGTCGTAGTTC	TGTGACAGTAGCTCCGAACCGTTTTGATTGCTGACCATATCTTCAGACCATCAACGGCAAAAGGATAGTCAACCTGGGGAGTCGTAGTTC
21	CTGTTCCCTCCAATGGCGCCTCTACTTATATATTATTCTGGTGATTTCAA	TGTGACAGTAGCTCCGAACC	AACCTGGGGAGTCGTAGTTC	TGTGACAGTAGCTCCGAACCCTGTTCCCTCCAATGGCGCCTCTACTTATATATTATTCTGGTGATTTCAAAACCTGGGGAGTCGTAGTTC
22	ATGGATGGGATCTACTATATGGATGTAGGTAGGTTTAGGTATAGTATTTA	TGTGACAGTAGCTCCGAACC	AACCTGGGGAGTCGTAGTTC	TGTGACAGTAGCTCCGAACCATGGATGGGATCTACTATATGGATGTAGGTAGGTTTAGGTATAGTATTTAAACCTGGGGAGTCGTAGTTC
23	GTATTATATTATTGATTATTGAGTAAATATTTTGTCCATTATATTTCAAA	TGTGACAGTAGCTCCGAACC	AACCTGGGGAGTCGTAGTTC	TGTGACAGTAGCTCCGAACCGTATTATATTATTGATTATTGAGTAAATATTTTGTCCATTATATTTCAAAAACCTGGGGAGTCGTAGTTC
24	CGTGCTAATTGACCGTTAATTTAAGGTTATTTCTACCAGCCAGTTTTCGT	TGTGACAGTAGCTCCGAACC	AACCTGGGGAGTCGTAGTTC	TGTGACAGTAGCTCCGAACCCGTGCTAATTGACCGTTAATTTAAGGTTATTTCTACCAGCCAGTTTTCGTAACCTGGGGAGTCGTAGTTC
25	TTATTATGGCATGTGGAATAGTAACCGAGGAATGATGTTTATGTGTTCTT	TGTGACAGTAGCTCCGAACC	AACCTGGGGAGTCGTAGTTC	TGTGACAGTAGCTCCGAACCTTATTATGGCATGTGGAATAGTAACCGAGGAATGATGTTTATGTGTTCTTAACCTGGGGAGTCGTAGTTC
26	TCGTGCCTGTTCTGACCCAATCTTCCAAGTATGCAGGGTTTCCAAGTCTC	TGTGACAGTAGCTCCGAACC	AACCTGGGGAGTCGTAGTTC	TGTGACAGTAGCTCCGAACCTCGTGCCTGTTCTGACCCAATCTTCCAAGTATGCAGGGTTTCCAAGTCTCAACCTGGGGAGTCGTAGTTC
27	TGGTACTTTCTCCATGTTGTATTATCTACTCAGAAACTCATACAAATGAA	TGTGACAGTAGCTCCGAACC	AACCTGGGGAGTCGTAGTTC	TGTGACAGTAGCTCCGAACCTGGTACTTTCTCCATGTTGTATTATCTACTCAGAAACTCATACAAATGAAAACCTGGGGAGTCGTAGTTC
28	ATGAAGTAGAAATAAGAAATAGTAAACAAAGAAAGAAGTGCAGTGTATTC	TGTGACAGTAGCTCCGAACC	AACCTGGGGAGTCGTAGTTC	TGTGACAGTAGCTCCGAACCATGAAGTAGAAATAAGAAATAGTAAACAAAGAAAGAAGTGCAGTGTATTCAACCTGGGGAGTCGTAGTTC
29	TTAGTCAGTATCTAGTAGTAATTGAGGATGGGCAGCATTGATAGTGGCTT	TGTGACAGTAGCTCCGAACC	AACCTGGGGAGTCGTAGTTC	TGTGACAGTAGCTCCGAACCTTAGTCAGTATCTAGTAGTAATTGAGGATGGGCAGCATTGATAGTGGCTTAACCTGGGGAGTCGTAGTTC
30	TAAATAAATATTCTTATTCAAACTAGAAAAGATGCTTTGCCTTTGCCTAT	TGTGACAGTAGCTCCGAACC	AACCTGGGGAGTCGTAGTTC	TGTGACAGTAGCTCCGAACCTAAATAAATATTCTTATTCAAACTAGAAAAGATGCTTTGCCTTTGCCTATAACCTGGGGAGTCGTAGTTC
31	GAAATCTCAAACTGAAAGCAAGATTAAAGGAACCGTTGTCCTGACGAAGA	TGTGACAGTAGCTCCGAACC	AACCTGGGGAGTCGTAGTTC	TGTGACAGTAGCTCCGAACCGAAATCTCAAACTGAAAGCAAGATTAAAGGAACCGTTGTCCTGACGAAGAAACCTGGGGAGTCGTAGTTC
32	GAAGGAAAACAGGAATGAAAAGATAATGAGCACAATGTCCCGATCAGGCT	TGTGACAGTAGCTCCGAACC	AACCTGGGGAGTCGTAGTTC	TGTGACAGTAGCTCCGAACCGAAGGAAAACAGGAATGAAAAGATAATGAGCACAATGTCCCGATCAGGCTAACCTGGGGAGTCGTAGTTC
33	TCGTAGAGGAAGAACGGGCCGAACTCTAATATCAACAGGTAACTCTTTGG	TGTGACAGTAGCTCCGAACC	AACCTGGGGAGTCGTAGTTC	TGTGACAGTAGCTCCGAACCTCGTAGAGGAAGAACGGGCCGAACTCTAATATCAACAGGTAACTCTTTGGAACCTGGGGAGTCGTAGTTC
34	GTAGTGCCTCAAATTCAGGAGCTAGAAATTGCATTATTGACTTCAGGGCA	TGTGACAGTAGCTCCGAACC	AACCTGGGGAGTCGTAGTTC	TGTGACAGTAGCTCCGAACCGTAGTGCCTCAAATTCAGGAGCTAGAAATTGCATTATTGACTTCAGGGCAAACCTGGGGAGTCGTAGTTC
35	GTATTTGAATTTCTTCTCTACCTTTGATGATTTGGGGTATAGGAAAACTG	TGTGACAGTAGCTCCGAACC	AACCTGGGGAGTCGTAGTTC	TGTGACAGTAGCTCCGAACCGTATTTGAATTTCTTCTCTACCTTTGATGATTTGGGGTATAGGAAAACTGAACCTGGGGAGTCGTAGTTC
36	TGGCTAGACAGACGCTGGTTAATGCTGGAGGGATGCTTGAGAAGACAGTT	TGTGACAGTAGCTCCGAACC	AACCTGGGGAGTCGTAGTTC	TGTGACAGTAGCTCCGAACCTGGCTAGACAGACGCTGGTTAATGCTGGAGGGATGCTTGAGAAGACAGTTAACCTGGGGAGTCGTAGTTC
37	GGCATTCCTAAAGACTATCACGCCACAGATTCAAAGCTTACTTCGCATTT	TGTGACAGTAGCTCCGAACC	AACCTGGGGAGTCGTAGTTC	TGTGACAGTAGCTCCGAACCGGCATTCCTAAAGACTATCACGCCACAGATTCAAAGCTTACTTCGCATTTAACCTGGGGAGTCGTAGTTC
38	ATACTAATGCAGCTTTTAGTTTAGATATCTATATATGCACATTATATGTC	TGTGACAGTAGCTCCGAACC	AACCTGGGGAGTCGTAGTTC	TGTGACAGTAGCTCCGAACCATACTAATGCAGCTTTTAGTTTAGATATCTATATATGCACATTATATGTCAACCTGGGGAGTCGTAGTTC
39	AGGCATGATGGCATCAATAGAATCAAACTAAAGTACAGCCTTACATTATG	TGTGACAGTAGCTCCGAACC	AACCTGGGGAGTCGTAGTTC	TGTGACAGTAGCTCCGAACCAGGCATGATGGCATCAATAGAATCAAACTAAAGTACAGCCTTACATTATGAACCTGGGGAGTCGTAGTTC
40	AGAGAAACATCAAATAAGTAAATATGTTAAAGGAAGAAGCCTATAGAAAA	TGTGACAGTAGCTCCGAACC	AACCTGGGGAGTCGTAGTTC	TGTGACAGTAGCTCCGAACCAGAGAAACATCAAATAAGTAAATATGTTAAAGGAAGAAGCCTATAGAAAAAACCTGGGGAGTCGTAGTTC
41	ACCAAAGCAACAGGTATATAGATGAATTTGCAACTAACATTATGACCCTA	TGTGACAGTAGCTCCGAACC	AACCTGGGGAGTCGTAGTTC	TGTGACAGTAGCTCCGAACCACCAAAGCAACAGGTATATAGATGAATTTGCAACTAACATTATGACCCTAAACCTGGGGAGTCGTAGTTC
42	CTACCCTGTCAATTATGAGTAGTGATATACAGTAACAAATCAGTAATTAT	TGTGACAGTAGCTCCGAACC	AACCTGGGGAGTCGTAGTTC	TGTGACAGTAGCTCCGAACCCTACCCTGTCAATTATGAGTAGTGATATACAGTAACAAATCAGTAATTATAACCTGGGGAGTCGTAGTTC
43	TTCTAATAATATCTGGGACTAAATTTTAGTTATGTTTCCTTTTCCTTTTA	TGTGACAGTAGCTCCGAACC	AACCTGGGGAGTCGTAGTTC	TGTGACAGTAGCTCCGAACCTTCTAATAATATCTGGGACTAAATTTTAGTTATGTTTCCTTTTCCTTTTAAACCTGGGGAGTCGTAGTTC
44	AATGAGAAGCTATCCATCCCAACAATGTTAATAATGATCATAAAAGAATC	TGTGACAGTAGCTCCGAACC	AACCTGGGGAGTCGTAGTTC	TGTGACAGTAGCTCCGAACCAATGAGAAGCTATCCATCCCAACAATGTTAATAATGATCATAAAAGAATCAACCTGGGGAGTCGTAGTTC
45	TTTGGTTAGATATTTTGACTATCTTTCTATTAGTTACACTTCATTGCTTG	TGTGACAGTAGCTCCGAACC	AACCTGGGGAGTCGTAGTTC	TGTGACAGTAGCTCCGAACCTTTGGTTAGATATTTTGACTATCTTTCTATTAGTTACACTTCATTGCTTGAACCTGGGGAGTCGTAGTTC
46	ACGTTTGGGCCAATCATATATTTTCATAATAAAGGTTCAACATGTGCACA	TGTGACAGTAGCTCCGAACC	AACCTGGGGAGTCGTAGTTC	TGTGACAGTAGCTCCGAACCACGTTTGGGCCAATCATATATTTTCATAATAAAGGTTCAACATGTGCACAAACCTGGGGAGTCGTAGTTC
47	TCCATACCCAAAATCAACATGTTCAGCTGAATTGCCTTTATCTGTCAAAA	TGTGACAGTAGCTCCGAACC	AACCTGGGGAGTCGTAGTTC	TGTGACAGTAGCTCCGAACCTCCATACCCAAAATCAACATGTTCAGCTGAATTGCCTTTATCTGTCAAAAAACCTGGGGAGTCGTAGTTC
48	CTTTTATGCTACTATTTTGAGGTATCCTGCAACAACTGATTTGTATTTAT	TGTGACAGTAGCTCCGAACC	AACCTGGGGAGTCGTAGTTC	TGTGACAGTAGCTCCGAACCCTTTTATGCTACTATTTTGAGGTATCCTGCAACAACTGATTTGTATTTATAACCTGGGGAGTCGTAGTTC
49	ACTTCTTCCAAAGTCCAATTGCAGCATGGCAGTTTAAGTGTTATTAATGA	TGTGACAGTAGCTCCGAACC	AACCTGGGGAGTCGTAGTTC	TGTGACAGTAGCTCCGAACCACTTCTTCCAAAGTCCAATTGCAGCATGGCAGTTTAAGTGTTATTAATGAAACCTGGGGAGTCGTAGTTC
50	CAAGTTGGTTCTCTTGGTTTTCTGGCTCAAAGGGCTGCACATCTTGGAAT	TGTGACAGTAGCTCCGAACC	AACCTGGGGAGTCGTAGTTC	TGTGACAGTAGCTCCGAACCCAAGTTGGTTCTCTTGGTTTTCTGGCTCAAAGGGCTGCACATCTTGGAATAACCTGGGGAGTCGTAGTTC
51	GGTTCGCAATTTCGTGTAGAATCTATGTTTCTAAGGTTGGCACACACCCA	TGTGACAGTAGCTCCGAACC	AACCTGGGGAGTCGTAGTTC	TGTGACAGTAGCTCCGAACCGGTTCGCAATTTCGTGTAGAATCTATGTTTCTAAGGTTGGCACACACCCAAACCTGGGGAGTCGTAGTTC
52	GTACTGCCTCGCTTGTTGGAAGAAATAATATCAACTAGGATTATGGTGAA	TGTGACAGTAGCTCCGAACC	AACCTGGGGAGTCGTAGTTC	TGTGACAGTAGCTCCGAACCGTACTGCCTCGCTTGTTGGAAGAAATAATATCAACTAGGATTATGGTGAAAACCTGGGGAGTCGTAGTTC
53	CATGATAAGTGGAAAGCTAAAGTTATCTATGGTGATACAGATAGGTGCAT	TGTGACAGTAGCTCCGAACC	AACCTGGGGAGTCGTAGTTC	TGTGACAGTAGCTCCGAACCCATGATAAGTGGAAAGCTAAAGTTATCTATGGTGATACAGATAGGTGCATAACCTGGGGAGTCGTAGTTC
54	TCAAAGTGAGCCAAAATTTGATGCAAAAGGTATTGAGACTGTACGAAGAG	TGTGACAGTAGCTCCGAACC	AACCTGGGGAGTCGTAGTTC	TGTGACAGTAGCTCCGAACCTCAAAGTGAGCCAAAATTTGATGCAAAAGGTATTGAGACTGTACGAAGAGAACCTGGGGAGTCGTAGTTC
55	TCAAGATGTTGATAAGGTAACCTCTAGAGACTGATTCCTTTCCTGAGACT	TGTGACAGTAGCTCCGAACC	AACCTGGGGAGTCGTAGTTC	TGTGACAGTAGCTCCGAACCTCAAGATGTTGATAAGGTAACCTCTAGAGACTGATTCCTTTCCTGAGACTAACCTGGGGAGTCGTAGTTC
56	TGACAGTAAATGAAACATATACATTGAAACTTGGACATATGTATAATAAG	TGTGACAGTAGCTCCGAACC	AACCTGGGGAGTCGTAGTTC	TGTGACAGTAGCTCCGAACCTGACAGTAAATGAAACATATACATTGAAACTTGGACATATGTATAATAAGAACCTGGGGAGTCGTAGTTC
57	ATGGTCCAAGGATCATCCCGTCTATGTCAAAGCTGTTCCATGTGTGAGGC	TGTGACAGTAGCTCCGAACC	AACCTGGGGAGTCGTAGTTC	TGTGACAGTAGCTCCGAACCATGGTCCAAGGATCATCCCGTCTATGTCAAAGCTGTTCCATGTGTGAGGCAACCTGGGGAGTCGTAGTTC
58	AAACTTGTTTATGAAGTAATATGATGAAATCTTGGTCCAGTTAGTTGTTA	TGTGACAGTAGCTCCGAACC	AACCTGGGGAGTCGTAGTTC	TGTGACAGTAGCTCCGAACCAAACTTGTTTATGAAGTAATATGATGAAATCTTGGTCCAGTTAGTTGTTAAACCTGGGGAGTCGTAGTTC
59	GCACTTGCGAAAGAGCTTATCTACTGACAAATAAAGAAGATGAAGCAAGG	TGTGACAGTAGCTCCGAACC	AACCTGGGGAGTCGTAGTTC	TGTGACAGTAGCTCCGAACCGCACTTGCGAAAGAGCTTATCTACTGACAAATAAAGAAGATGAAGCAAGGAACCTGGGGAGTCGTAGTTC
60	AGGAGGAAGATTTGGATCAATTGGTACAGCACTCAACTTCACAACCTCAT	TGTGACAGTAGCTCCGAACC	AACCTGGGGAGTCGTAGTTC	TGTGACAGTAGCTCCGAACCAGGAGGAAGATTTGGATCAATTGGTACAGCACTCAACTTCACAACCTCATAACCTGGGGAGTCGTAGTTC
61	TAATTTCCATTTTCCATTTTGATATTAACAAAGGGCTGAAGAGTTGCAAG	TGTGACAGTAGCTCCGAACC	AACCTGGGGAGTCGTAGTTC	TGTGACAGTAGCTCCGAACCTAATTTCCATTTTCCATTTTGATATTAACAAAGGGCTGAAGAGTTGCAAGAACCTGGGGAGTCGTAGTTC
62	GCATATGTTCCTGTTTCTTAATCCAGTTTCCCTTCTCCACCCCTCTTCCT	TGTGACAGTAGCTCCGAACC	AACCTGGGGAGTCGTAGTTC	TGTGACAGTAGCTCCGAACCGCATATGTTCCTGTTTCTTAATCCAGTTTCCCTTCTCCACCCCTCTTCCTAACCTGGGGAGTCGTAGTTC
63	AAACAACCACAAGTTTCACATACAGAATCTCCCTCATGAACAGTTGCAGT	TGTGACAGTAGCTCCGAACC	AACCTGGGGAGTCGTAGTTC	TGTGACAGTAGCTCCGAACCAAACAACCACAAGTTTCACATACAGAATCTCCCTCATGAACAGTTGCAGTAACCTGGGGAGTCGTAGTTC
64	AAGGTCATCATCTGAGCCAAAATCTATTTCATTGTCAGCGCCAGAGAAAG	TGTGACAGTAGCTCCGAACC	AACCTGGGGAGTCGTAGTTC	TGTGACAGTAGCTCCGAACCAAGGTCATCATCTGAGCCAAAATCTATTTCATTGTCAGCGCCAGAGAAAGAACCTGGGGAGTCGTAGTTC
65	CTTCTTCTGCTGTTCAATGTCCTCAGGGTCAGGGCTAAGTTCATCATCTG	TGTGACAGTAGCTCCGAACC	AACCTGGGGAGTCGTAGTTC	TGTGACAGTAGCTCCGAACCCTTCTTCTGCTGTTCAATGTCCTCAGGGTCAGGGCTAAGTTCATCATCTGAACCTGGGGAGTCGTAGTTC
66	ATAGGCGAGGAAATTCTGACAGTGAAGATGAACCATTATTCTCTGATTCA	TGTGACAGTAGCTCCGAACC	AACCTGGGGAGTCGTAGTTC	TGTGACAGTAGCTCCGAACCATAGGCGAGGAAATTCTGACAGTGAAGATGAACCATTATTCTCTGATTCAAACCTGGGGAGTCGTAGTTC
67	CTTATAAAGAGAGATCAGGAAATCAAAGGGATGGTAGTTATTTGGACGAT	TGTGACAGTAGCTCCGAACC	AACCTGGGGAGTCGTAGTTC	TGTGACAGTAGCTCCGAACCCTTATAAAGAGAGATCAGGAAATCAAAGGGATGGTAGTTATTTGGACGATAACCTGGGGAGTCGTAGTTC
68	GGTTTCTTGACCGTTATGCAATCATTAAAAGTTATTTGCAGGAACCCATT	TGTGACAGTAGCTCCGAACC	AACCTGGGGAGTCGTAGTTC	TGTGACAGTAGCTCCGAACCGGTTTCTTGACCGTTATGCAATCATTAAAAGTTATTTGCAGGAACCCATTAACCTGGGGAGTCGTAGTTC
69	TGAGAAAGTGATACATGATAAAGAAGAGTCTGTCAAGGATTCTCAACAAT	TGTGACAGTAGCTCCGAACC	AACCTGGGGAGTCGTAGTTC	TGTGACAGTAGCTCCGAACCTGAGAAAGTGATACATGATAAAGAAGAGTCTGTCAAGGATTCTCAACAATAACCTGGGGAGTCGTAGTTC
70	CTCAAAAGACAATACAACATTTCATCCTACTATTTTAAATATATAGAGCA	TGTGACAGTAGCTCCGAACC	AACCTGGGGAGTCGTAGTTC	TGTGACAGTAGCTCCGAACCCTCAAAAGACAATACAACATTTCATCCTACTATTTTAAATATATAGAGCAAACCTGGGGAGTCGTAGTTC
71	GAATTGAAAGGTTTTAAGACAGGCTTTATGGTTGTAATTATTTGAGTTAC	TGTGACAGTAGCTCCGAACC	AACCTGGGGAGTCGTAGTTC	TGTGACAGTAGCTCCGAACCGAATTGAAAGGTTTTAAGACAGGCTTTATGGTTGTAATTATTTGAGTTACAACCTGGGGAGTCGTAGTTC
72	TAAATTTCTTGTATGAATCTAATAAAATGTCTTAGCTTATCAGGGTTGTC	TGTGACAGTAGCTCCGAACC	AACCTGGGGAGTCGTAGTTC	TGTGACAGTAGCTCCGAACCTAAATTTCTTGTATGAATCTAATAAAATGTCTTAGCTTATCAGGGTTGTCAACCTGGGGAGTCGTAGTTC
73	CAGCTGATTGAAAAGTAGATGCTTATAGGTTGAGAAAGTTGAATTTGCTT	TGTGACAGTAGCTCCGAACC	AACCTGGGGAGTCGTAGTTC	TGTGACAGTAGCTCCGAACCCAGCTGATTGAAAAGTAGATGCTTATAGGTTGAGAAAGTTGAATTTGCTTAACCTGGGGAGTCGTAGTTC
74	TGGAACCCAGGTACCCAGAGGAAATGAACAAATTGGTTGCTGCAGTATGG	TGTGACAGTAGCTCCGAACC	AACCTGGGGAGTCGTAGTTC	TGTGACAGTAGCTCCGAACCTGGAACCCAGGTACCCAGAGGAAATGAACAAATTGGTTGCTGCAGTATGGAACCTGGGGAGTCGTAGTTC
75	TCATTGGCATTGTGTCAAACATATATACTTTCATTTGCAACTAACATATG	TGTGACAGTAGCTCCGAACC	AACCTGGGGAGTCGTAGTTC	TGTGACAGTAGCTCCGAACCTCATTGGCATTGTGTCAAACATATATACTTTCATTTGCAACTAACATATGAACCTGGGGAGTCGTAGTTC
76	GAAACAAGAACATCATGACATGGTTATTAATACTGACATATTAAGTAAGA	TGTGACAGTAGCTCCGAACC	AACCTGGGGAGTCGTAGTTC	TGTGACAGTAGCTCCGAACCGAAACAAGAACATCATGACATGGTTATTAATACTGACATATTAAGTAAGAAACCTGGGGAGTCGTAGTTC
77	GTACAATCATCTTTTGGAATAGGTGCTTTAATCACATCTTTTATCATATT	TGTGACAGTAGCTCCGAACC	AACCTGGGGAGTCGTAGTTC	TGTGACAGTAGCTCCGAACCGTACAATCATCTTTTGGAATAGGTGCTTTAATCACATCTTTTATCATATTAACCTGGGGAGTCGTAGTTC
78	TAGGCTACATTGTTATACATACAACATAAACCAAAGCCTCCTTATGTATT	TGTGACAGTAGCTCCGAACC	AACCTGGGGAGTCGTAGTTC	TGTGACAGTAGCTCCGAACCTAGGCTACATTGTTATACATACAACATAAACCAAAGCCTCCTTATGTATTAACCTGGGGAGTCGTAGTTC
79	AAAGCATACTAGCCAAAGTTAACTCCCTTACGCCATAGCAAAATCCATTT	TGTGACAGTAGCTCCGAACC	AACCTGGGGAGTCGTAGTTC	TGTGACAGTAGCTCCGAACCAAAGCATACTAGCCAAAGTTAACTCCCTTACGCCATAGCAAAATCCATTTAACCTGGGGAGTCGTAGTTC
80	ATTTGTCTCATTCCATTTTAGGTCATTGCTTTGGATGTTAATTTACCAGT	TGTGACAGTAGCTCCGAACC	AACCTGGGGAGTCGTAGTTC	TGTGACAGTAGCTCCGAACCATTTGTCTCATTCCATTTTAGGTCATTGCTTTGGATGTTAATTTACCAGTAACCTGGGGAGTCGTAGTTC
81	CTTCCTGCAGTAGATAAACAAATTATATGAACTTTTCAAATAGTGAATCT	TGTGACAGTAGCTCCGAACC	AACCTGGGGAGTCGTAGTTC	TGTGACAGTAGCTCCGAACCCTTCCTGCAGTAGATAAACAAATTATATGAACTTTTCAAATAGTGAATCTAACCTGGGGAGTCGTAGTTC
82	CAACATATGTCTATAGAGTAACTTAGGATCAATATAGTTTTCAAGCTAAA	TGTGACAGTAGCTCCGAACC	AACCTGGGGAGTCGTAGTTC	TGTGACAGTAGCTCCGAACCCAACATATGTCTATAGAGTAACTTAGGATCAATATAGTTTTCAAGCTAAAAACCTGGGGAGTCGTAGTTC
83	TTAATGAACATTAAGGAGAACAAGATTATGATTTCTTCTTTTCTCGAAAA	TGTGACAGTAGCTCCGAACC	AACCTGGGGAGTCGTAGTTC	TGTGACAGTAGCTCCGAACCTTAATGAACATTAAGGAGAACAAGATTATGATTTCTTCTTTTCTCGAAAAAACCTGGGGAGTCGTAGTTC
84	GGATGTGTGTCAAGCTATGTTATAATGAATACCTCCACCATCTGAAATGG	TGTGACAGTAGCTCCGAACC	AACCTGGGGAGTCGTAGTTC	TGTGACAGTAGCTCCGAACCGGATGTGTGTCAAGCTATGTTATAATGAATACCTCCACCATCTGAAATGGAACCTGGGGAGTCGTAGTTC
85	GGTTGACAGATATTTAAATATTGCAGTTGTTAAAGCTTCCATGTCACAAA	TGTGACAGTAGCTCCGAACC	AACCTGGGGAGTCGTAGTTC	TGTGACAGTAGCTCCGAACCGGTTGACAGATATTTAAATATTGCAGTTGTTAAAGCTTCCATGTCACAAAAACCTGGGGAGTCGTAGTTC
86	CCACTTGTTTACGTTTCTAAAATTTTCTTTCCCTGCCAGTTTTGATATTT	TGTGACAGTAGCTCCGAACC	AACCTGGGGAGTCGTAGTTC	TGTGACAGTAGCTCCGAACCCCACTTGTTTACGTTTCTAAAATTTTCTTTCCCTGCCAGTTTTGATATTTAACCTGGGGAGTCGTAGTTC
87	TGTGTGGCCTTATGGTGGAAGGAGGGTCTATTTGAGTGGCTCTTTCACCA	TGTGACAGTAGCTCCGAACC	AACCTGGGGAGTCGTAGTTC	TGTGACAGTAGCTCCGAACCTGTGTGGCCTTATGGTGGAAGGAGGGTCTATTTGAGTGGCTCTTTCACCAAACCTGGGGAGTCGTAGTTC
88	TAGGGCTTTCTTGAATTCTGTTGGATCCAATATCTCTGTGTTATCTTCAG	TGTGACAGTAGCTCCGAACC	AACCTGGGGAGTCGTAGTTC	TGTGACAGTAGCTCCGAACCTAGGGCTTTCTTGAATTCTGTTGGATCCAATATCTCTGTGTTATCTTCAGAACCTGGGGAGTCGTAGTTC
89	AAAAGTTTCTGCTCAATGTAAAGTTCTATTCTTATGTAAATTTGGGAATC	TGTGACAGTAGCTCCGAACC	AACCTGGGGAGTCGTAGTTC	TGTGACAGTAGCTCCGAACCAAAAGTTTCTGCTCAATGTAAAGTTCTATTCTTATGTAAATTTGGGAATCAACCTGGGGAGTCGTAGTTC
90	TCATTTGAATTGATTAATTATCTTTGTTTCTAGGCAATTGGTGATTCTTA	TGTGACAGTAGCTCCGAACC	AACCTGGGGAGTCGTAGTTC	TGTGACAGTAGCTCCGAACCTCATTTGAATTGATTAATTATCTTTGTTTCTAGGCAATTGGTGATTCTTAAACCTGGGGAGTCGTAGTTC
91	TGGACTGCTTAAAGGTCAATTTGGTTTCTAAAGTTACTTATATGTTTTCA	TGTGACAGTAGCTCCGAACC	AACCTGGGGAGTCGTAGTTC	TGTGACAGTAGCTCCGAACCTGGACTGCTTAAAGGTCAATTTGGTTTCTAAAGTTACTTATATGTTTTCAAACCTGGGGAGTCGTAGTTC
92	AGGGAGGAACCAGAAAAGAATTCACAGAGTAACTACTGCACAACTGTATA	TGTGACAGTAGCTCCGAACC	AACCTGGGGAGTCGTAGTTC	TGTGACAGTAGCTCCGAACCAGGGAGGAACCAGAAAAGAATTCACAGAGTAACTACTGCACAACTGTATAAACCTGGGGAGTCGTAGTTC
93	ACTAAATCCCCTCCTCCTGCTTCCTTTCATGTTTGTTTCAGCGTAATTTT	TGTGACAGTAGCTCCGAACC	AACCTGGGGAGTCGTAGTTC	TGTGACAGTAGCTCCGAACCACTAAATCCCCTCCTCCTGCTTCCTTTCATGTTTGTTTCAGCGTAATTTTAACCTGGGGAGTCGTAGTTC
94	AGTTTGGATTCAACAATTCTTATATTAGTATGCTGTCAAGTTTCTGTAAT	TGTGACAGTAGCTCCGAACC	AACCTGGGGAGTCGTAGTTC	TGTGACAGTAGCTCCGAACCAGTTTGGATTCAACAATTCTTATATTAGTATGCTGTCAAGTTTCTGTAATAACCTGGGGAGTCGTAGTTC
95	AATAGGAATCTTGATATCTGACGTAAATAATTAATTCAAGTCTAGTTTGT	TGTGACAGTAGCTCCGAACC	AACCTGGGGAGTCGTAGTTC	TGTGACAGTAGCTCCGAACCAATAGGAATCTTGATATCTGACGTAAATAATTAATTCAAGTCTAGTTTGTAACCTGGGGAGTCGTAGTTC
96	ACATGTTCGGCATAAGAAAATGACCCATCAATGTTCACTTCAACTCTTGT	TGTGACAGTAGCTCCGAACC	AACCTGGGGAGTCGTAGTTC	TGTGACAGTAGCTCCGAACCACATGTTCGGCATAAGAAAATGACCCATCAATGTTCACTTCAACTCTTGTAACCTGGGGAGTCGTAGTTC
97	AATAAATGCATTTTAATATGTGAATGTGAAAGAGTTGAAGTAGAAACCAG	TGTGACAGTAGCTCCGAACC	AACCTGGGGAGTCGTAGTTC	TGTGACAGTAGCTCCGAACCAATAAATGCATTTTAATATGTGAATGTGAAAGAGTTGAAGTAGAAACCAGAACCTGGGGAGTCGTAGTTC
[truncated: 15,070 more rows]

## Sheet: Supplementary table 1 chr3
Supplementary Table 1. Oligo-FISH primer information.
[truncated: 15,168 more rows]

## Sheet: Supplementary table 1 chr4
Supplementary Table 1. Oligo-FISH primer information.
[truncated: 15,168 more rows]

[truncated: 9 more sheets: Supplementary table 1 chr5, Supplementary table 1 chr6, Supplementary table 1 chr7, Supplementary table 1 chr8, Supplementary table 1 chr9, Supplementary table 1 chr10, Supplementary table 1 chr11, Supplementary table 2, Supplementary table 3]
